# Supplementary material for: Self-promoted and stereospecific formation of N-glycosides
Source: PubMed Central journal article supplement — Chem Sci. 2019 Apr 18;10(20):5299–307. doi: 10.1039/c9sc00857h (PMC6540880; doi:10.1039/c9sc00857h), 2019-04-18

## NMR-spectra

### Contents

|                                  |    |
|----------------------------------|----|
| NMR-spectra .....                | 1  |
| Compound 1 $\alpha$ .....        | 3  |
| Compound 1 $\beta$ .....         | 5  |
| Compound 2 $\alpha$ .....        | 7  |
| Compound 2 $\beta$ .....         | 9  |
| Compound 3 $\alpha$ .....        | 11 |
| Compound 4 $\alpha$ .....        | 12 |
| Compound 4 $\beta$ .....         | 14 |
| Compound 5 .....                 | 16 |
| Compound 6 .....                 | 18 |
| Compound 7 .....                 | 20 |
| Compound 12 .....                | 22 |
| Compound 13 .....                | 24 |
| Compound 14 .....                | 26 |
| Compound 15 .....                | 28 |
| Compound 16 .....                | 30 |
| Compound 17 .....                | 32 |
| Compound 18 .....                | 33 |
| Compound 19 .....                | 35 |
| Compound 20 .....                | 37 |
| Compound 21 .....                | 38 |
| Compound 22 .....                | 40 |
| Compound 23 .....                | 42 |
| Compound 23 $\alpha/\beta$ ..... | 44 |
| Compound 24 .....                | 46 |
| Compound 24 $\alpha/\beta$ ..... | 48 |
| Compound 25 .....                | 50 |
| Compound 25 $\alpha/\beta$ ..... | 52 |
| Compound 26 .....                | 54 |
| Compound 26 $\alpha/\beta$ ..... | 56 |
| Compound 27 .....                | 58 |
| Compound 27 $\alpha/\beta$ ..... | 60 |
| Compound 28 .....                | 62 |
| Compound 28 $\alpha/\beta$ ..... | 64 |
| Compound 29 .....                | 66 |
| Compound 30 .....                | 68 |
| Compound 32 .....                | 70 |

|                             |     |
|-----------------------------|-----|
| Compound 33 .....           | 73  |
| Compound S1 .....           | 75  |
| Compound S3 .....           | 77  |
| Compound S10 .....          | 79  |
| Compound S11 .....          | 81  |
| Compound S12 .....          | 83  |
| Compound S13 .....          | 85  |
| Compound S14 .....          | 87  |
| Compound S15 .....          | 89  |
| Compound S16 $\alpha$ ..... | 91  |
| Compound S16 $\beta$ .....  | 93  |
| Compound S17 $\alpha$ ..... | 94  |
| Compound S17 $\beta$ .....  | 96  |
| Compound S18 $\alpha$ ..... | 98  |
| Compound S18 $\beta$ .....  | 100 |
| Compound S19 .....          | 102 |
| Compound S20 $\alpha$ ..... | 104 |
| Compound S20 $\beta$ .....  | 106 |
| Compound S21 .....          | 108 |
| Compound S22 $\alpha$ ..... | 110 |
| Compound S22 $\beta$ .....  | 112 |
| Compound S23 .....          | 114 |
| Compound S24 .....          | 116 |
| Compound S25 .....          | 118 |
| Compound S26 $\alpha$ ..... | 120 |
| Compound S26 $\beta$ .....  | 122 |
| Compound S27 .....          | 124 |
| Compound S28 .....          | 126 |
| Compound S29 .....          | 128 |
| Compound S30 .....          | 130 |
| Compound S31 .....          | 132 |
| Compound S32 .....          | 134 |



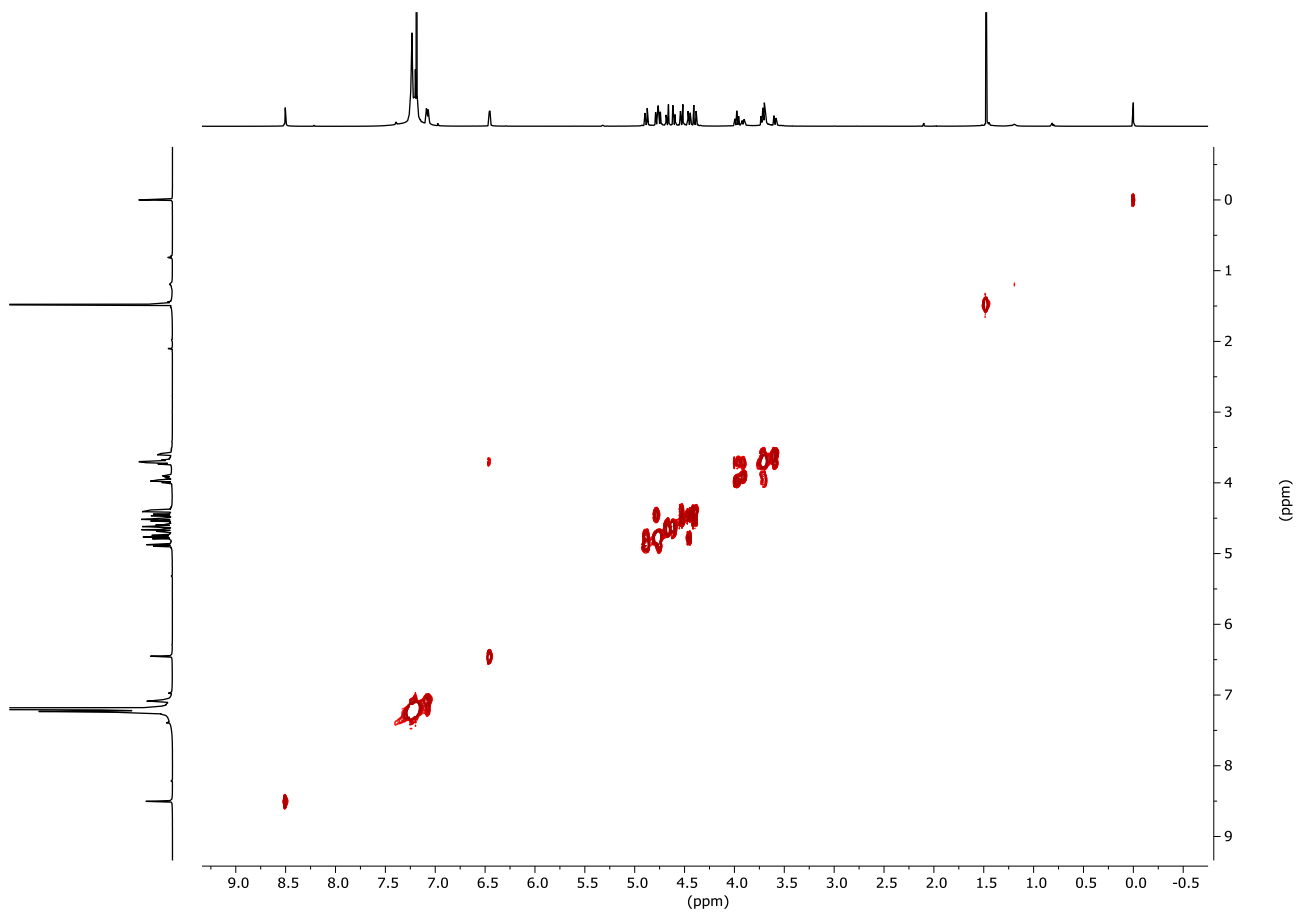



# Compound 1 $\beta$

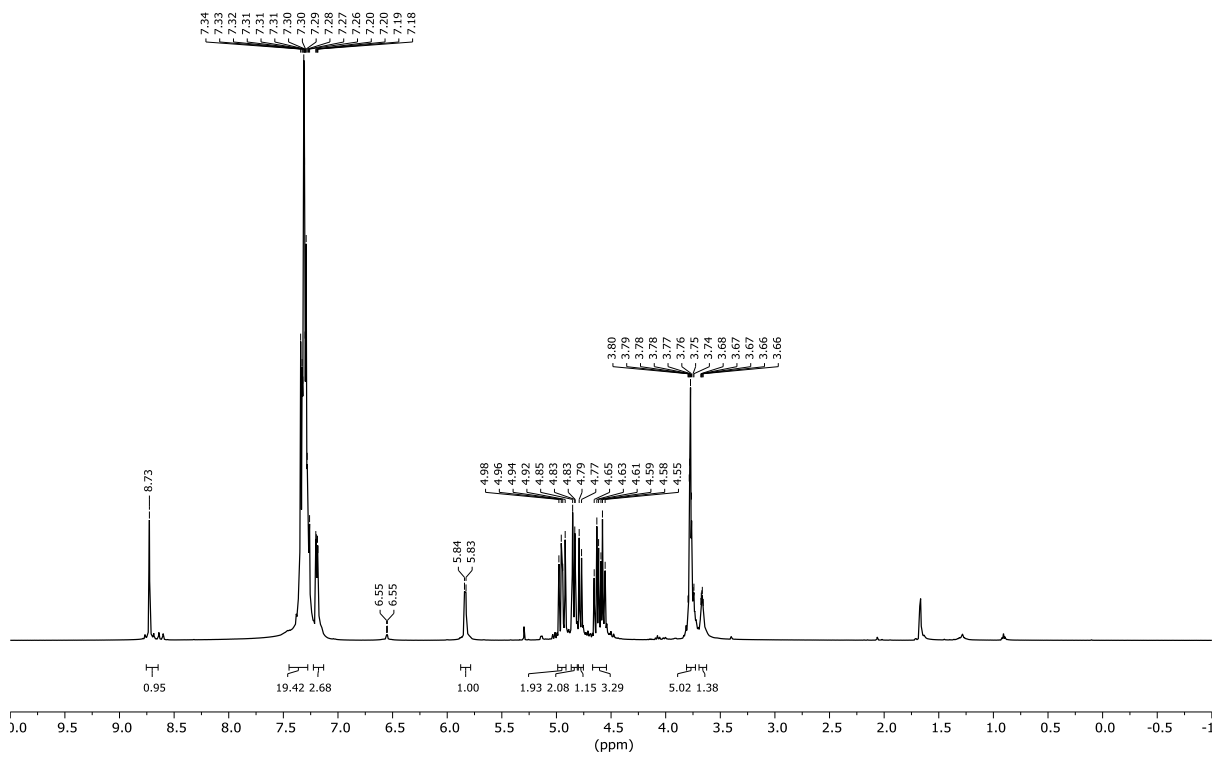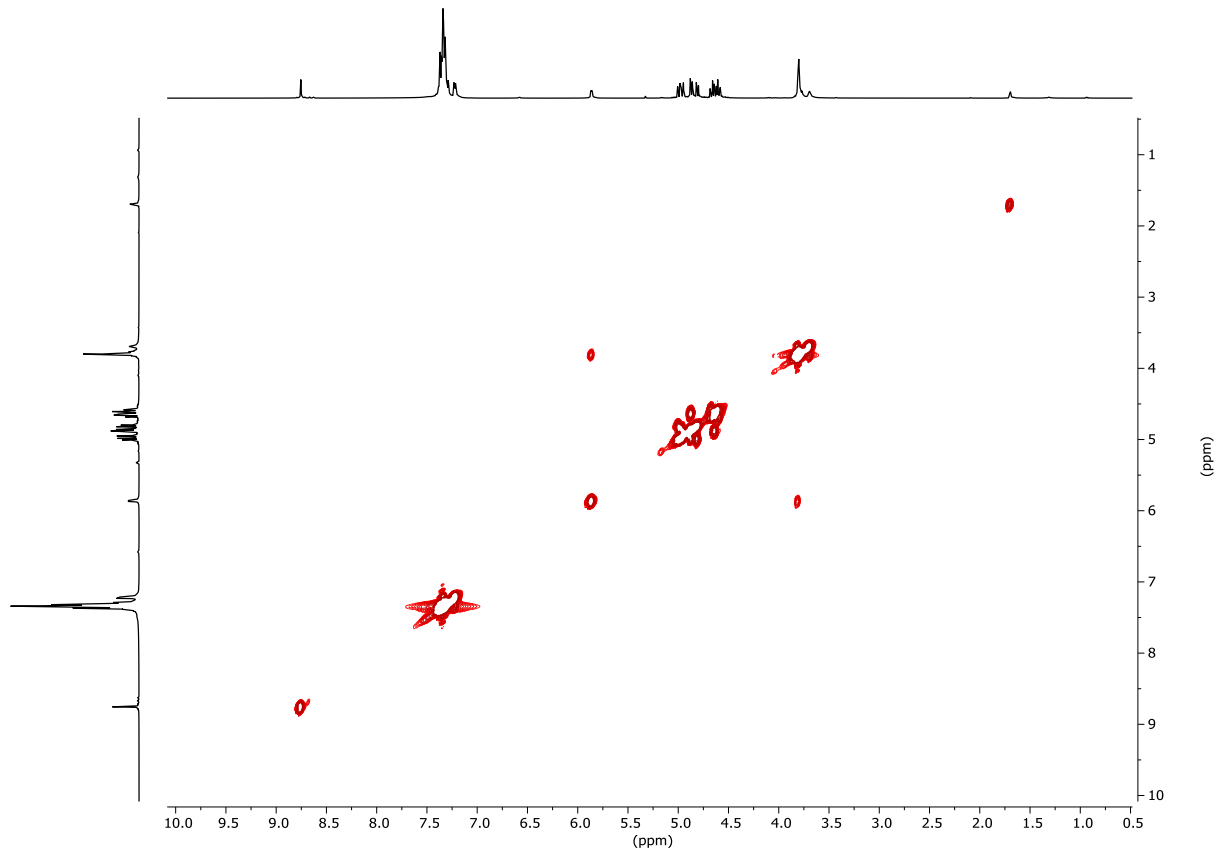

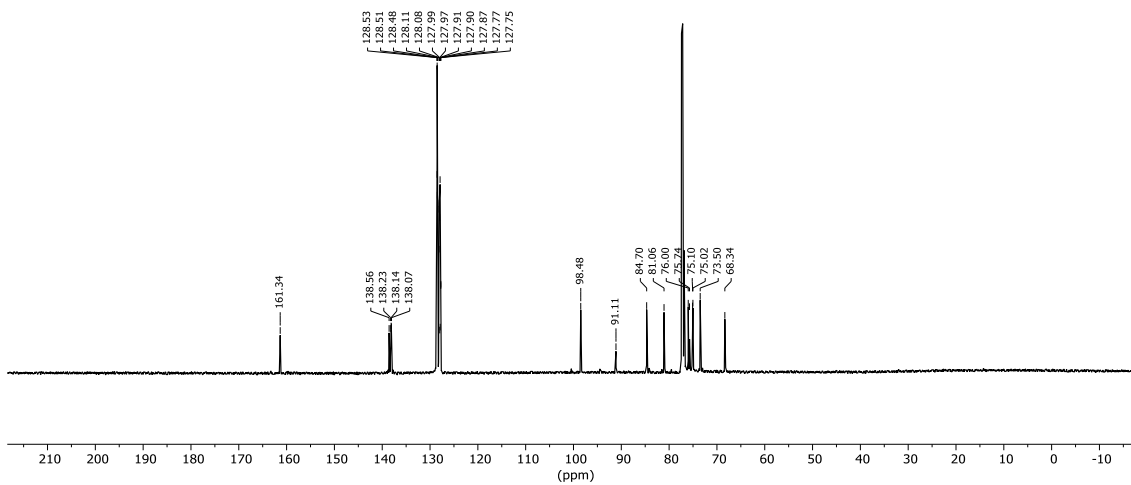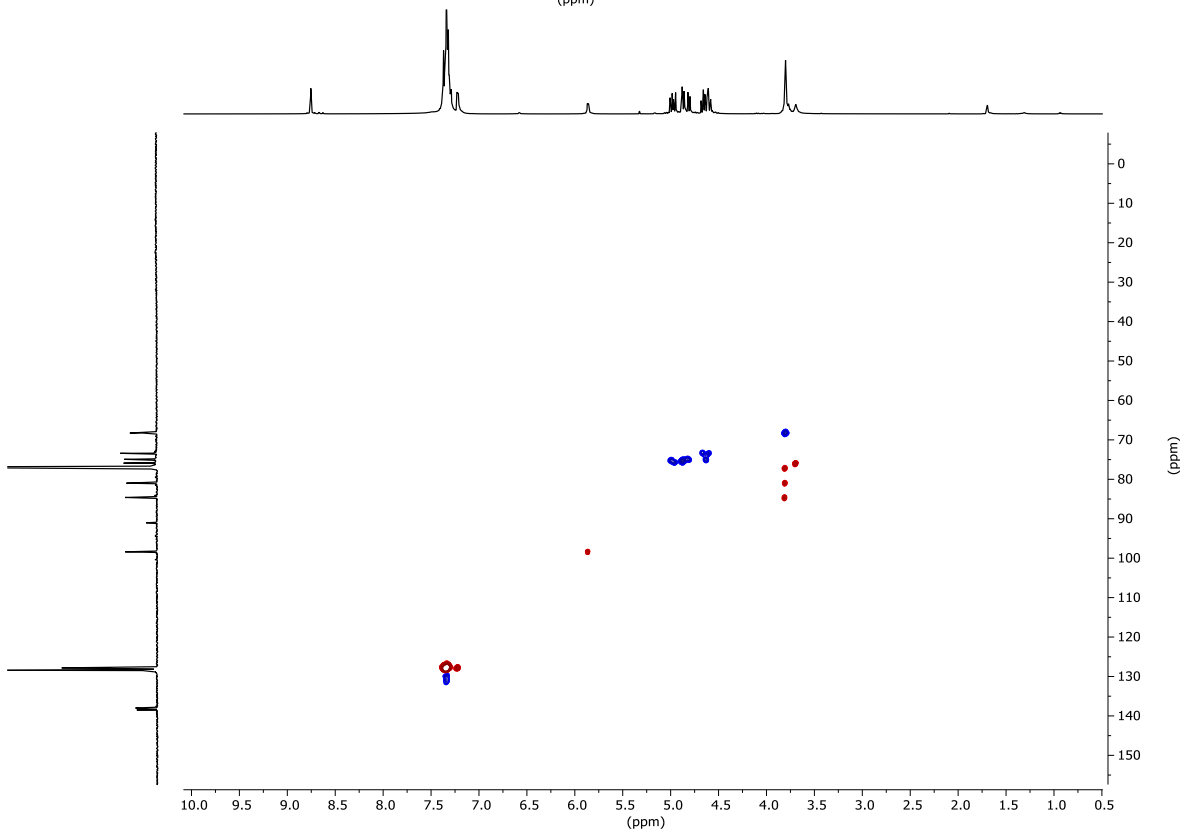

# Compound 2α

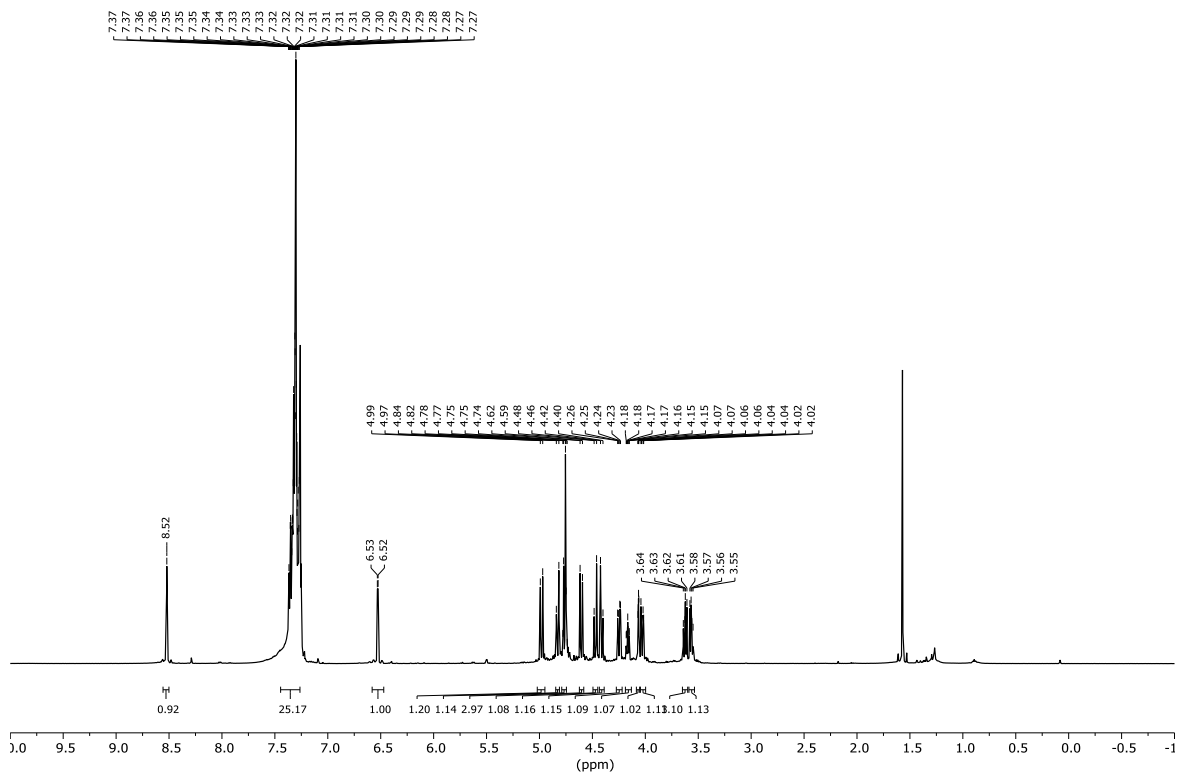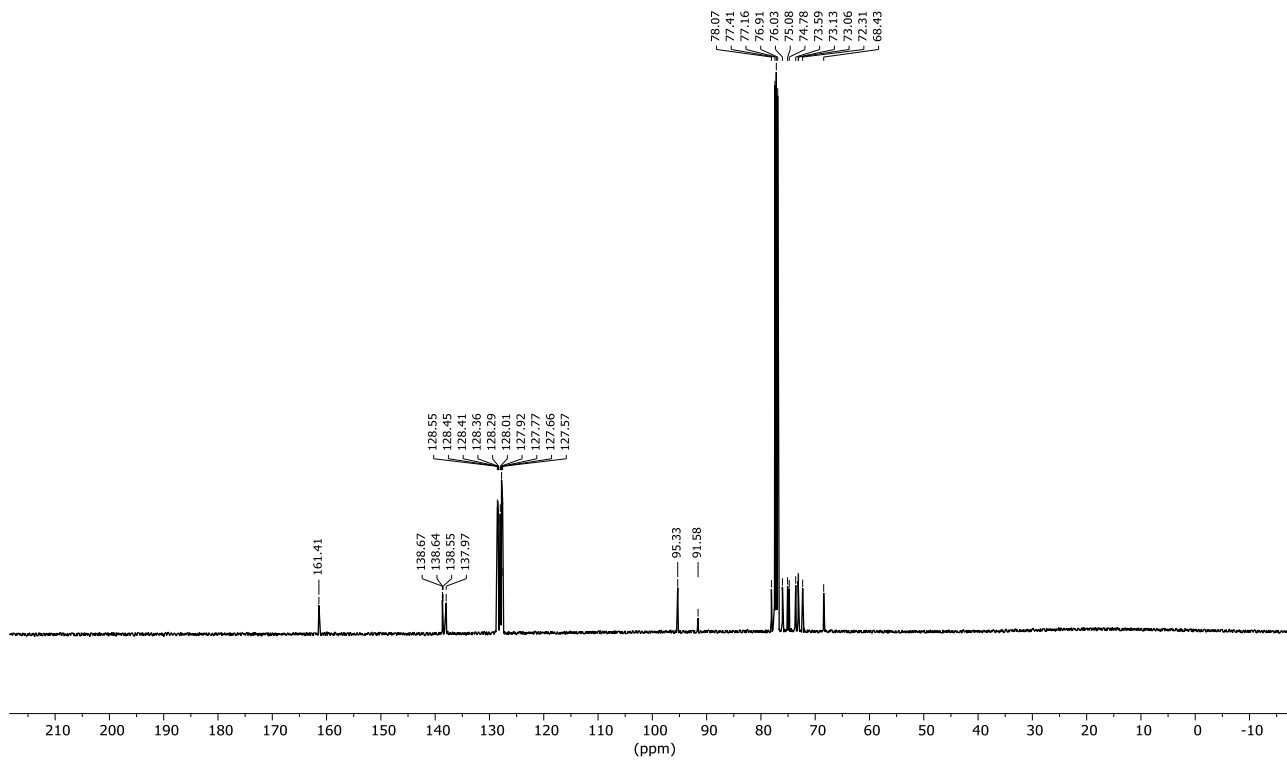

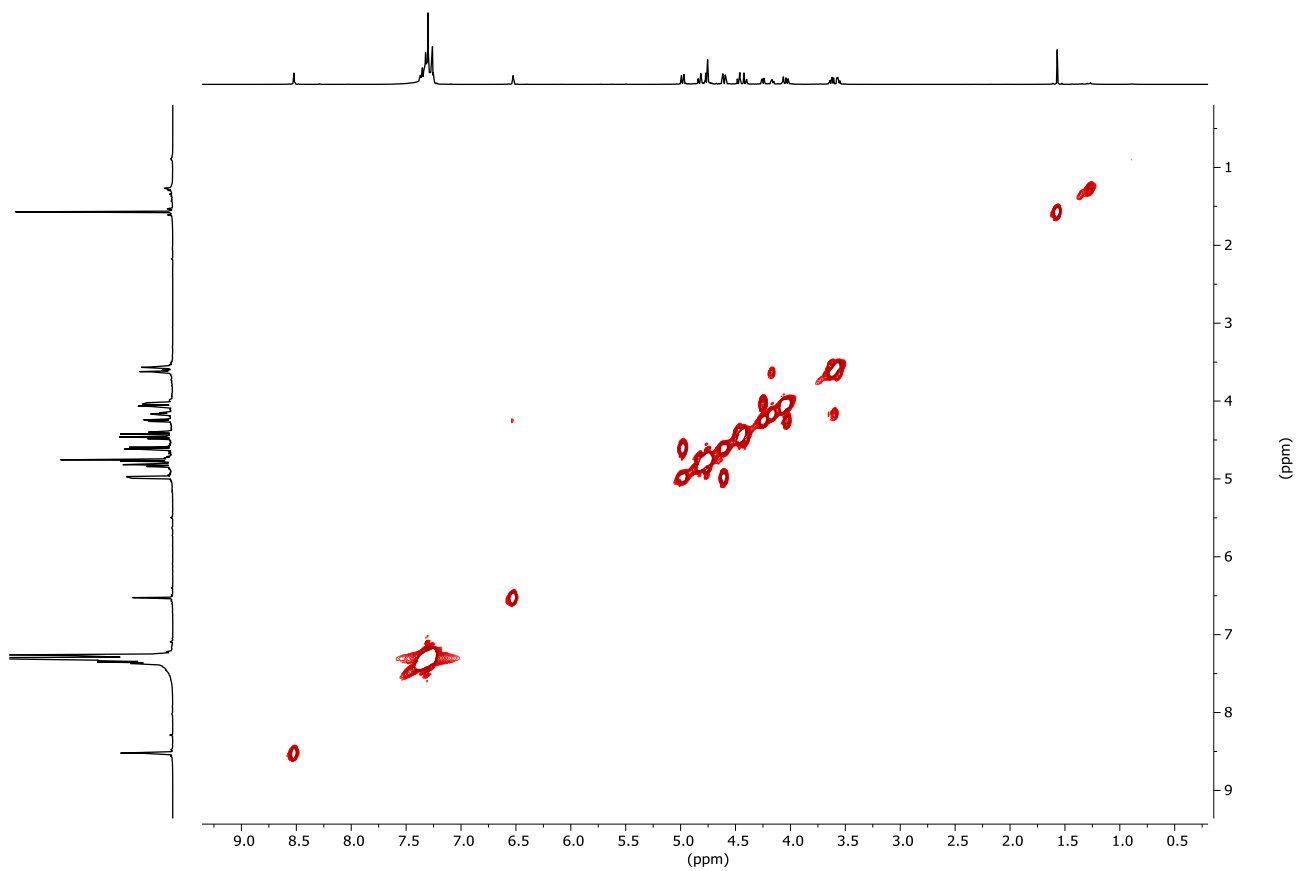

Compound 2β

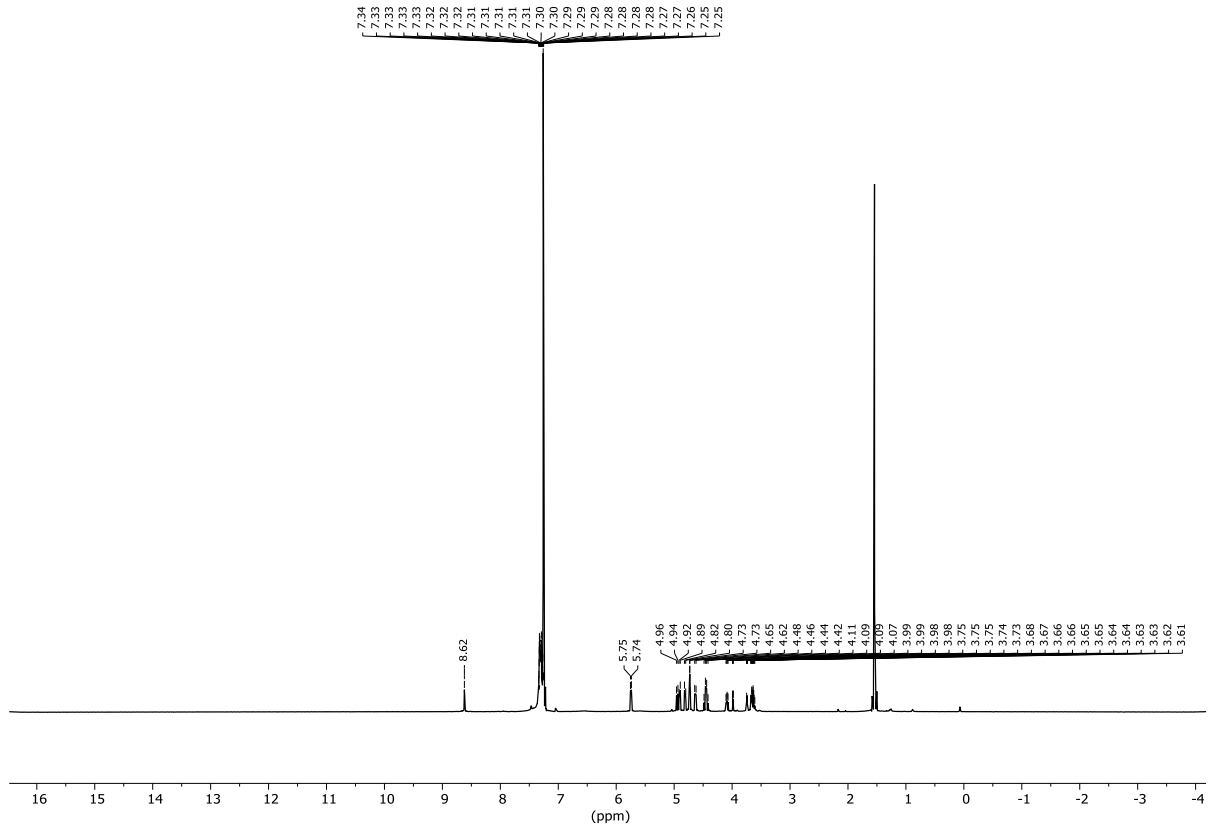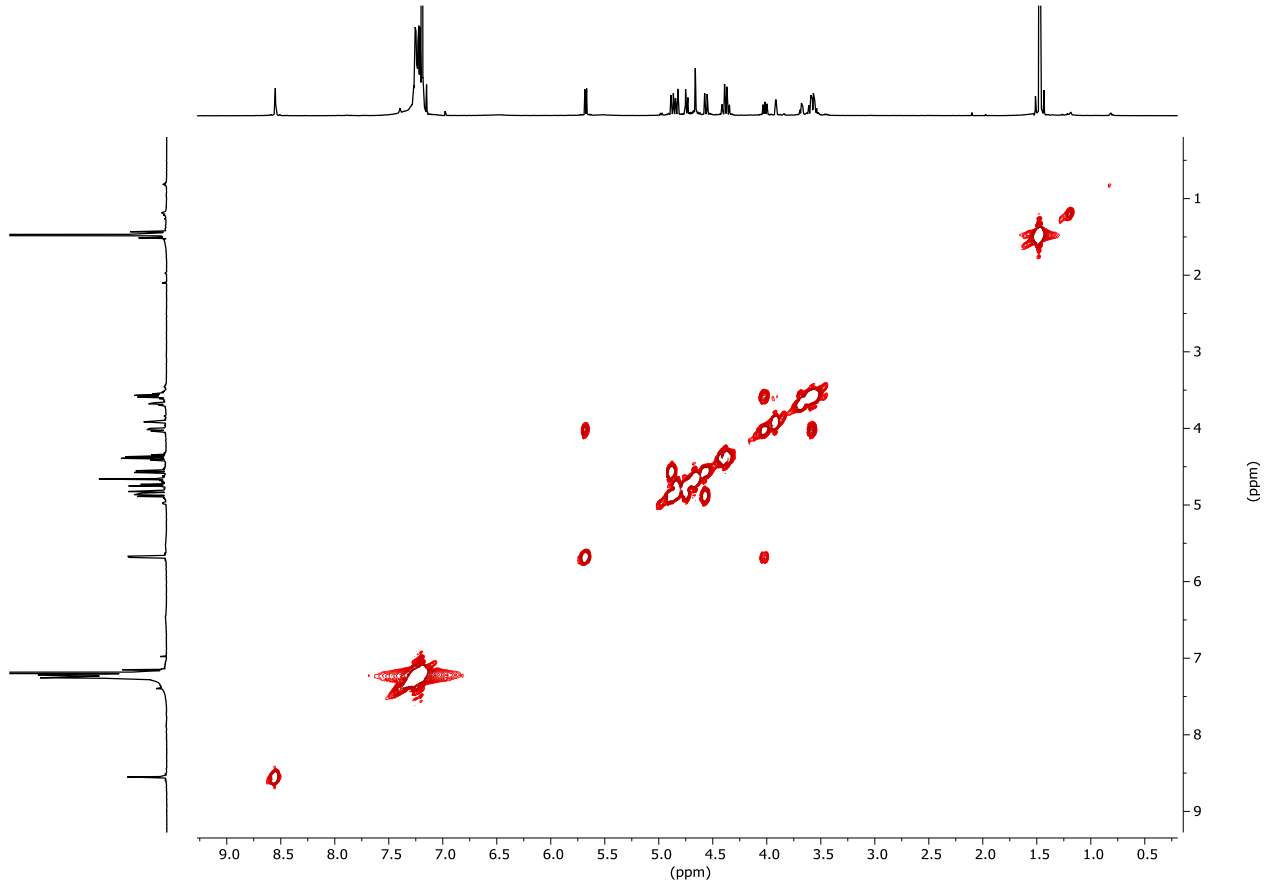

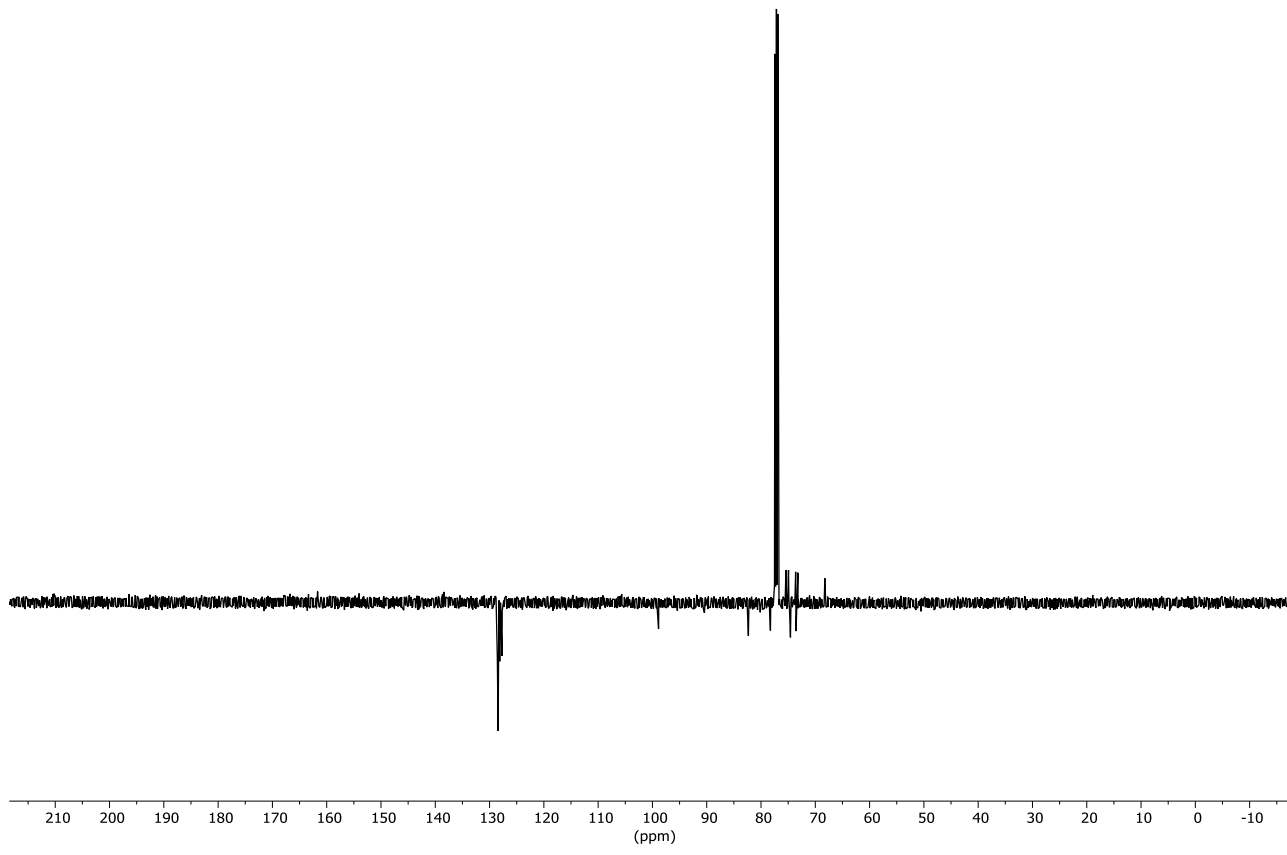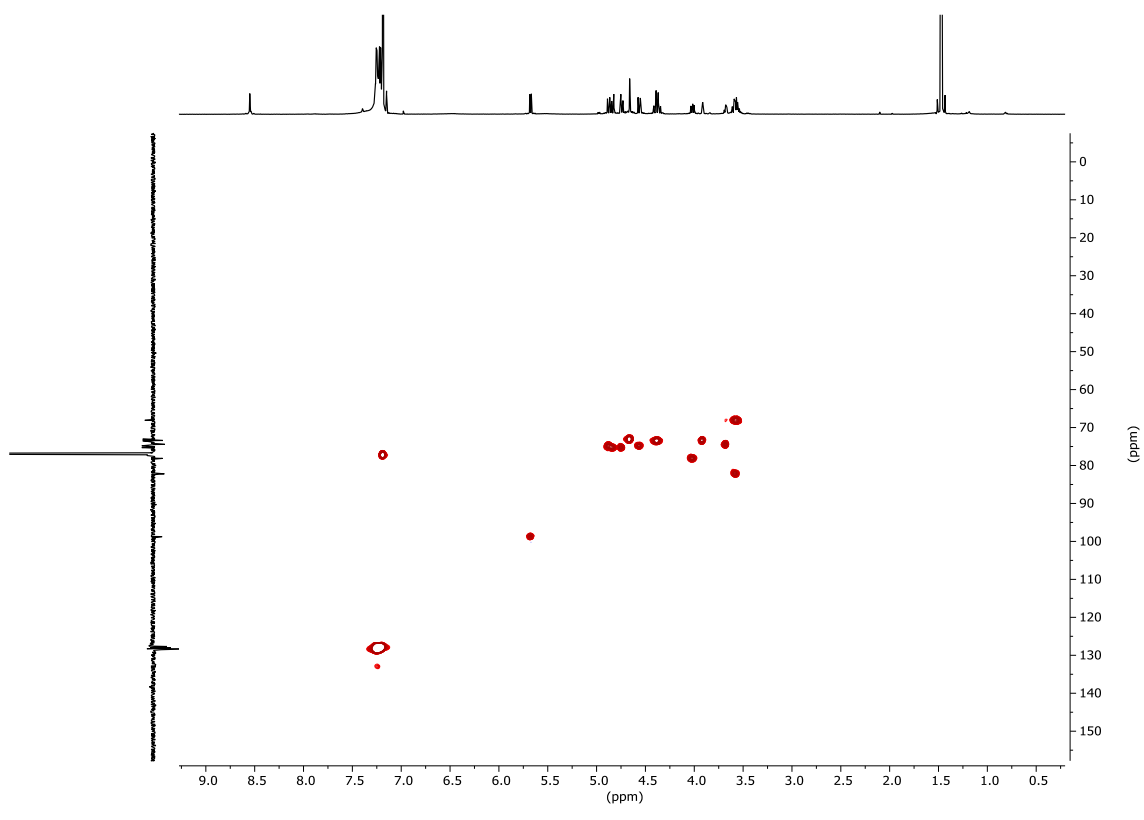

Compound 3 $\alpha$

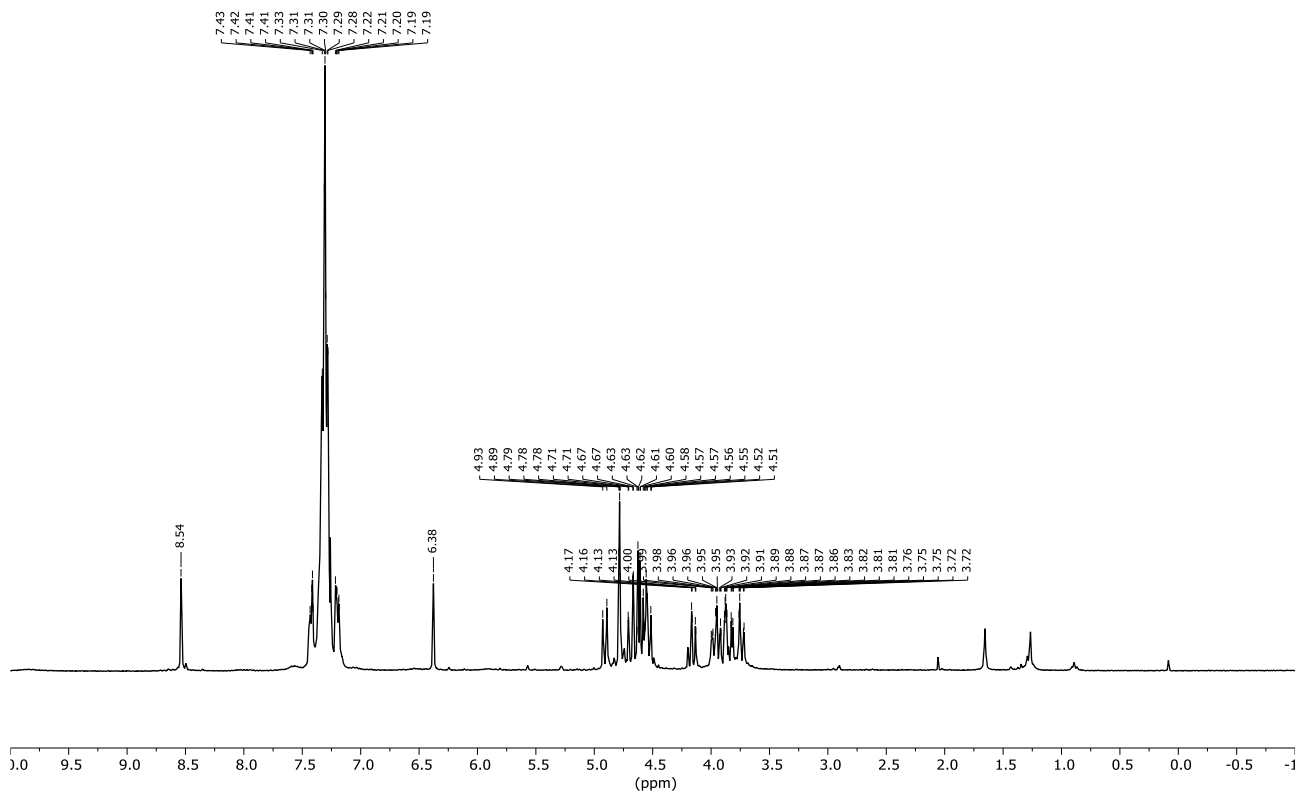

Compound 4 $\alpha$

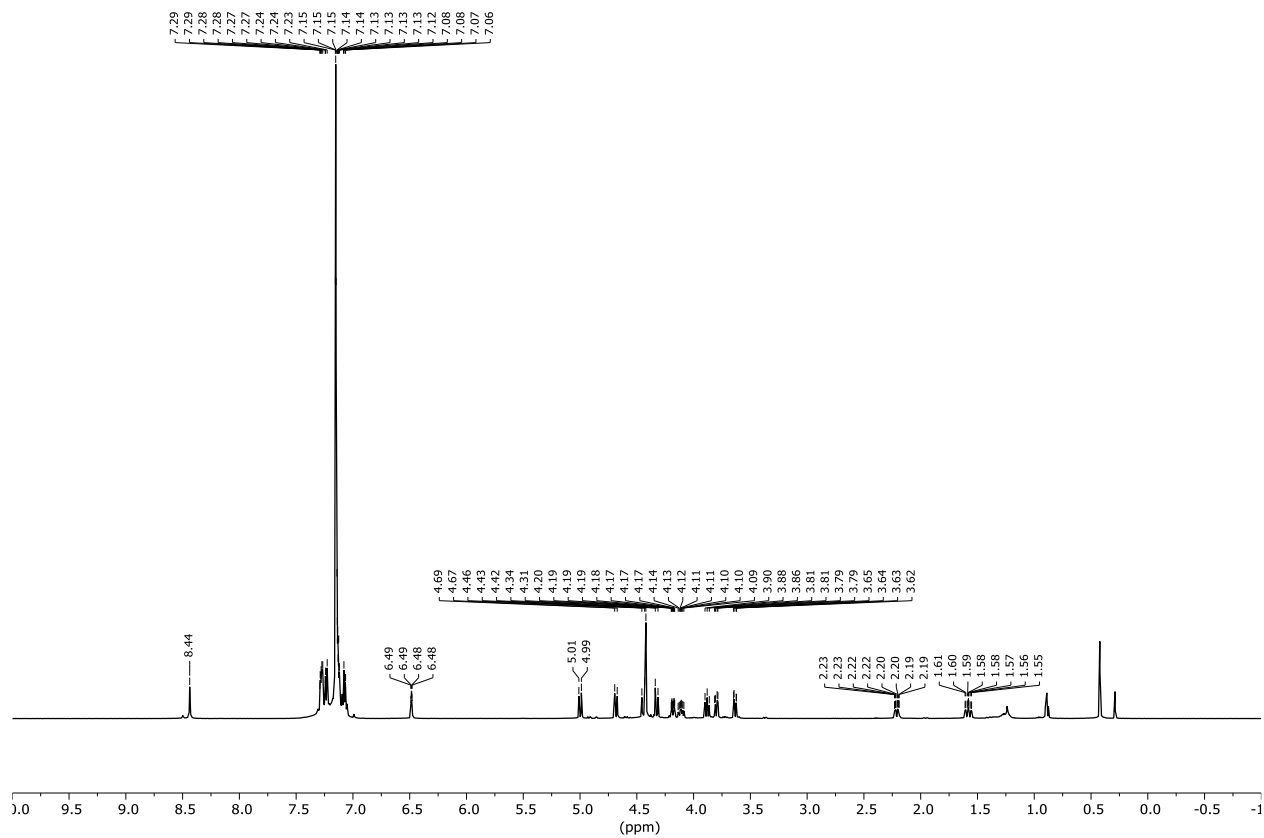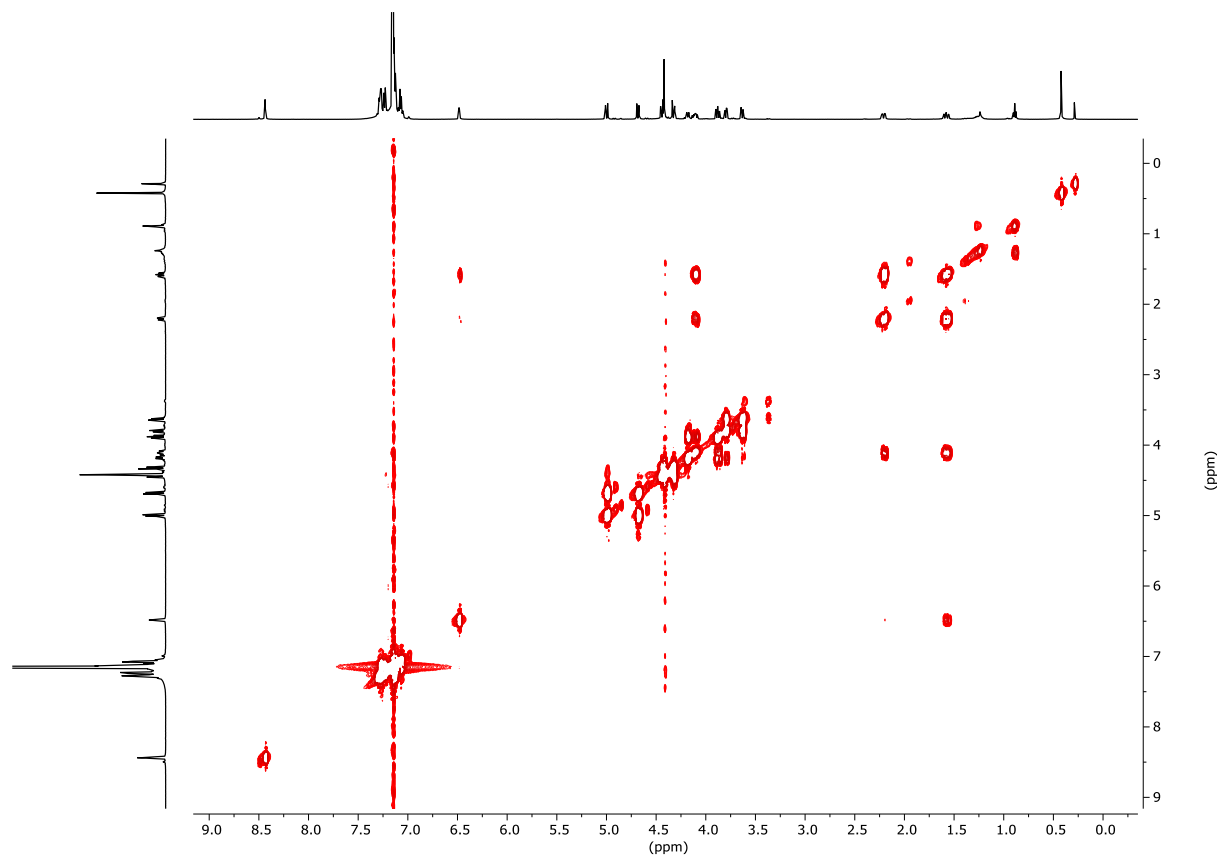



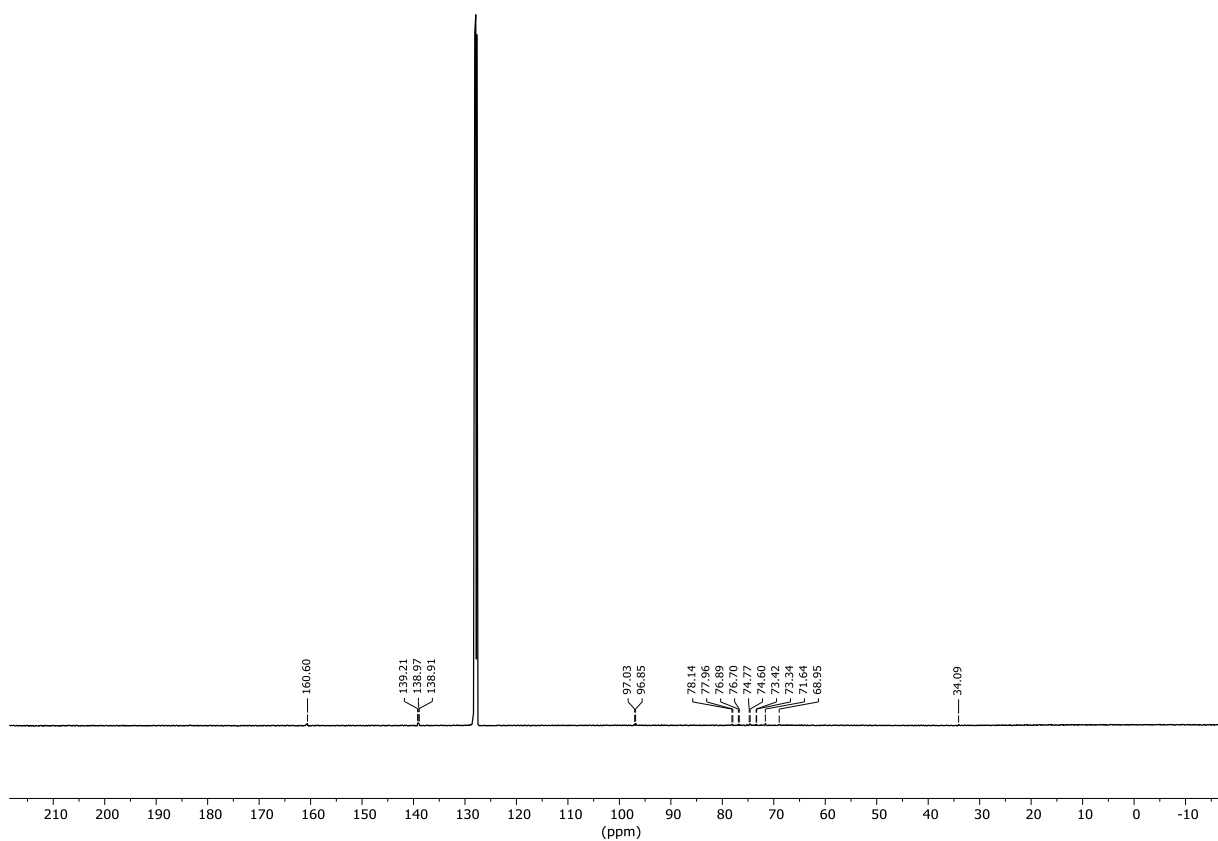

Compound 4 $\beta$

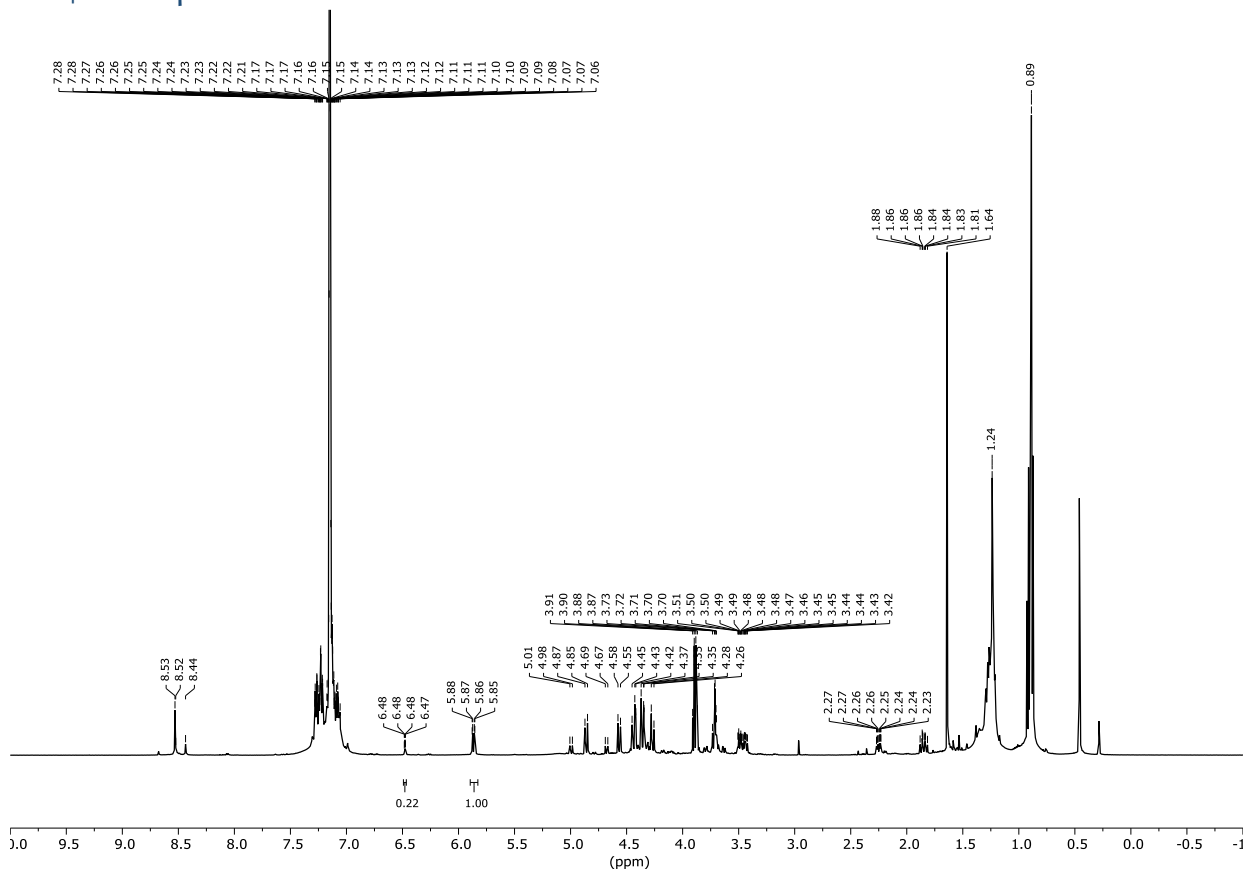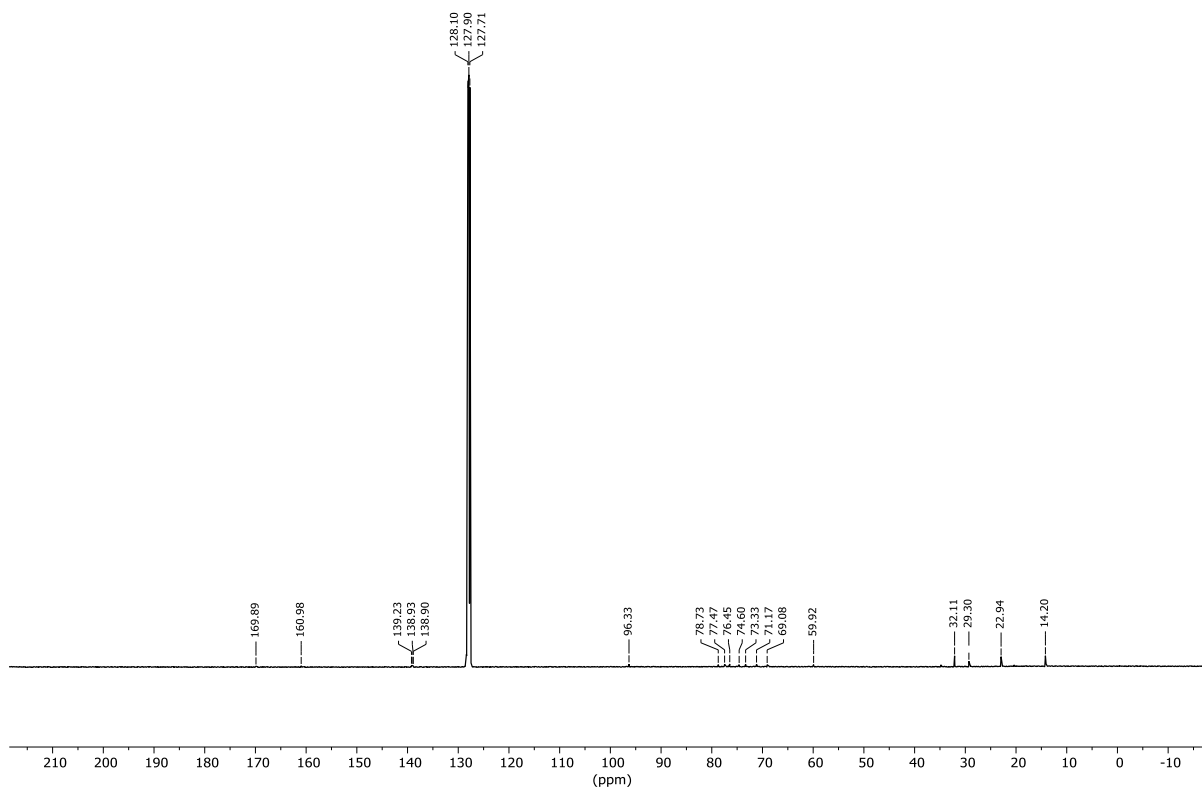

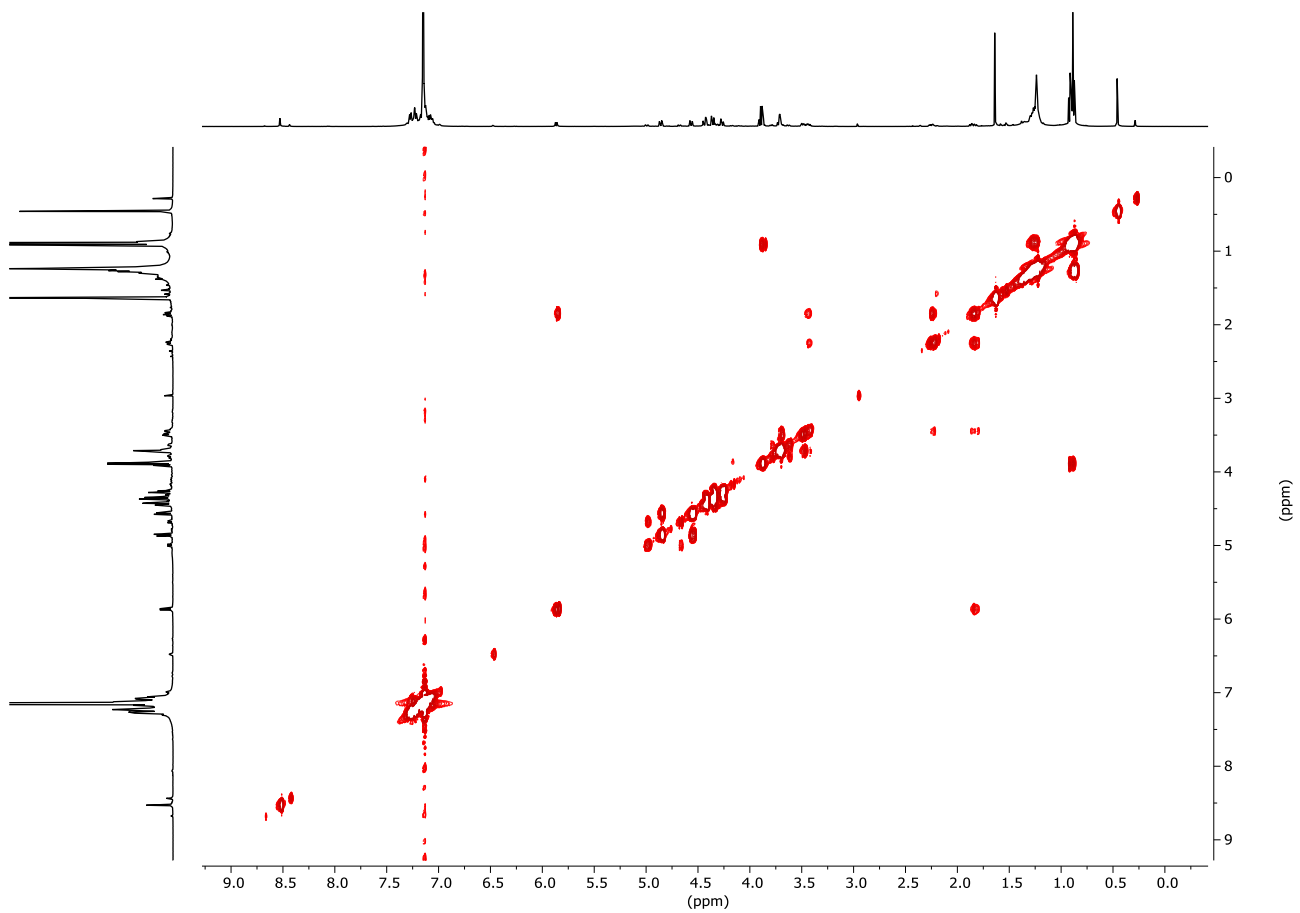

Compound 5

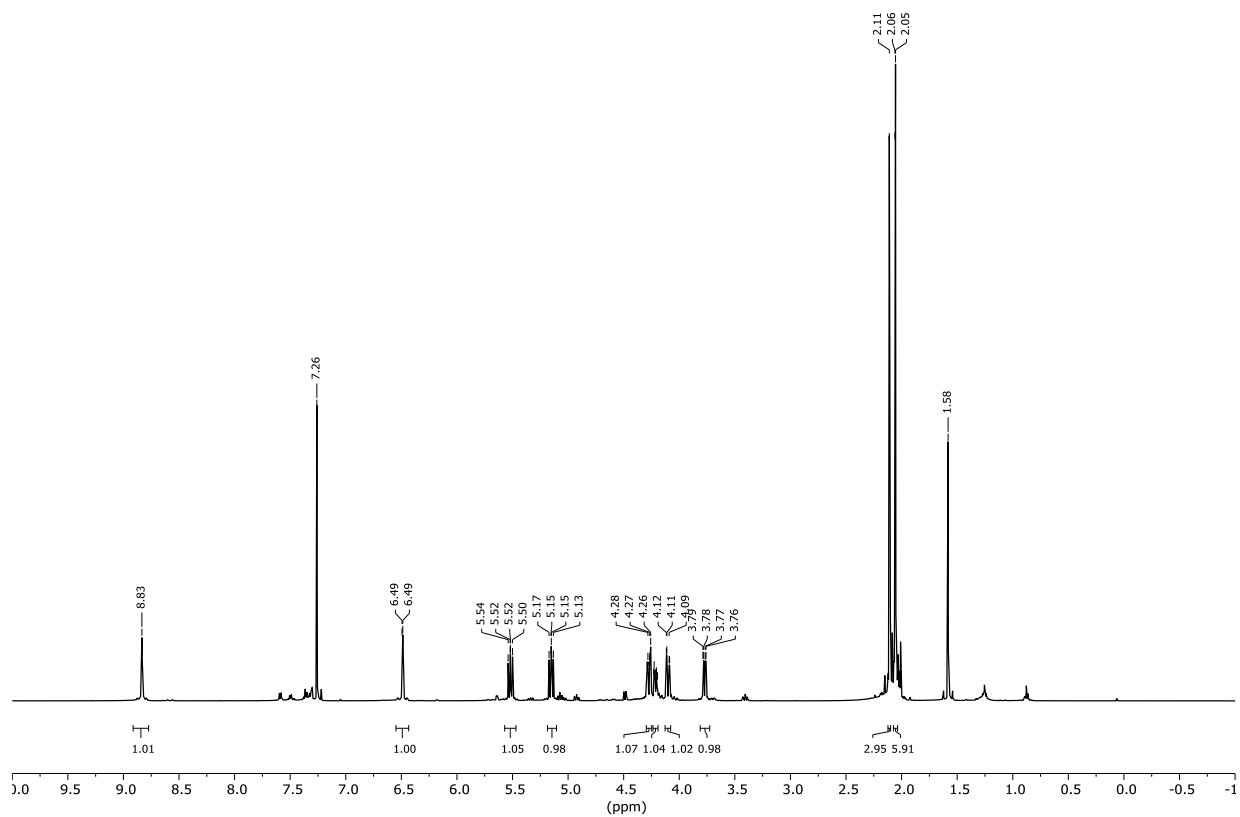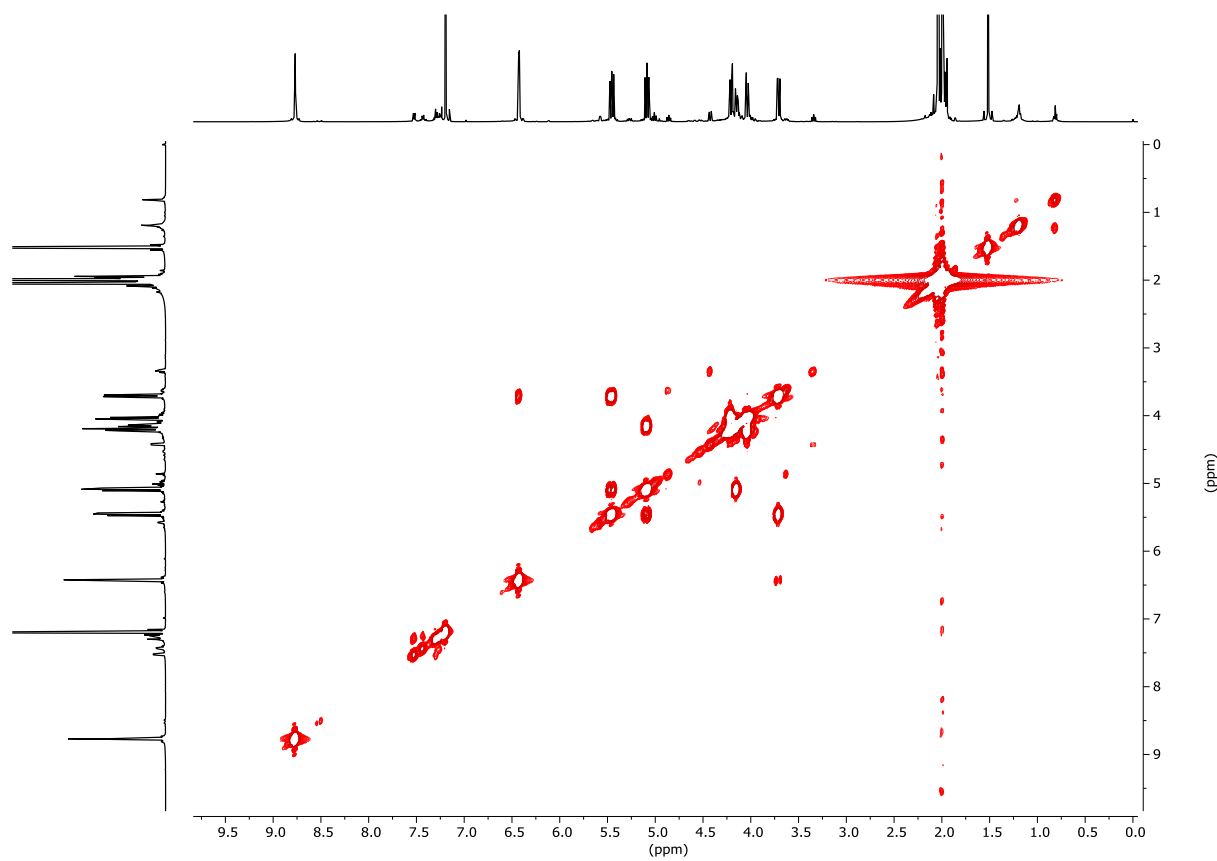

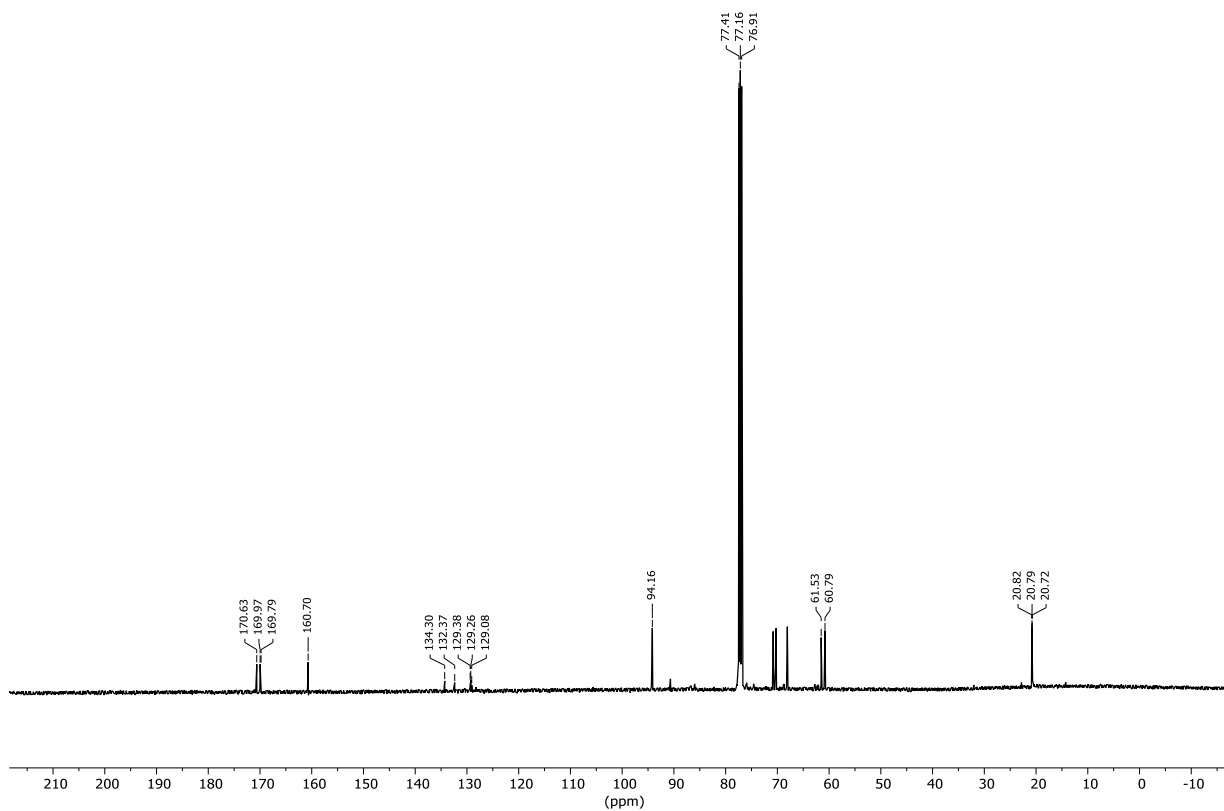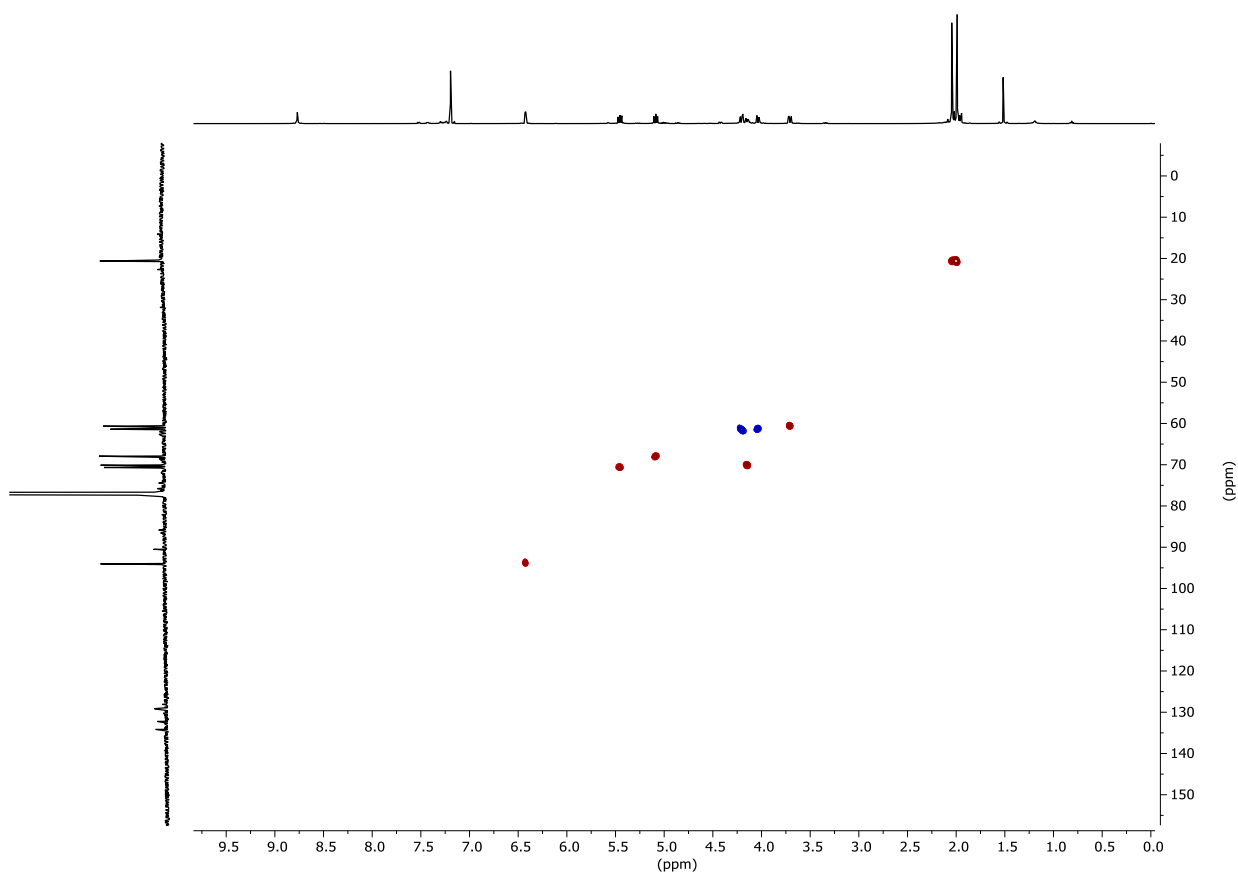

Compound 6

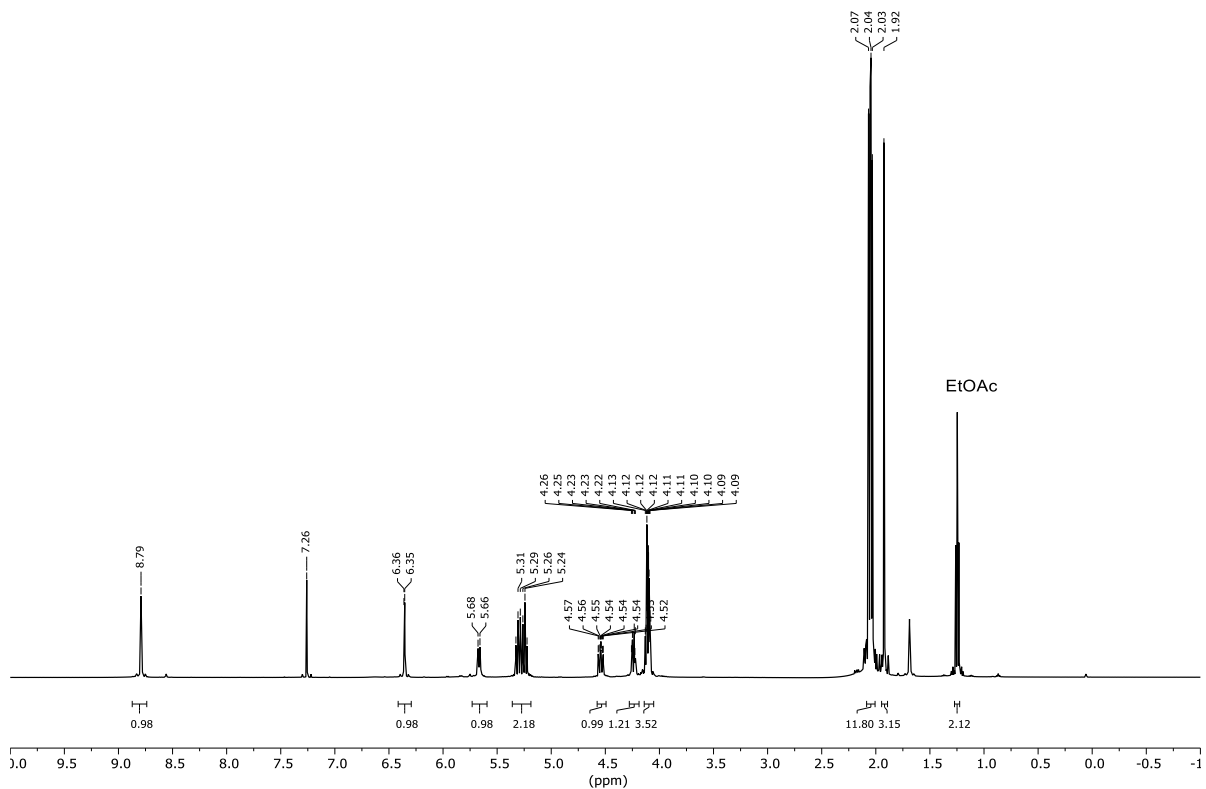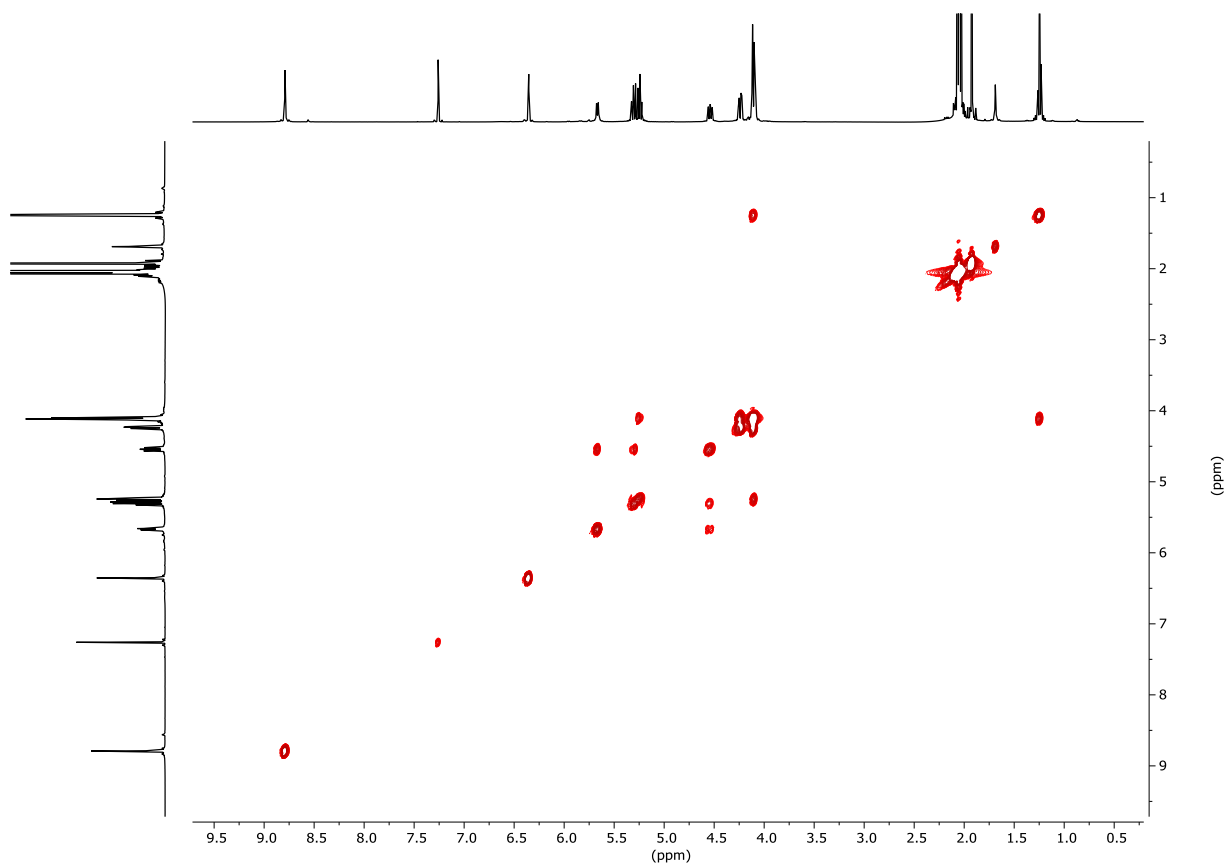

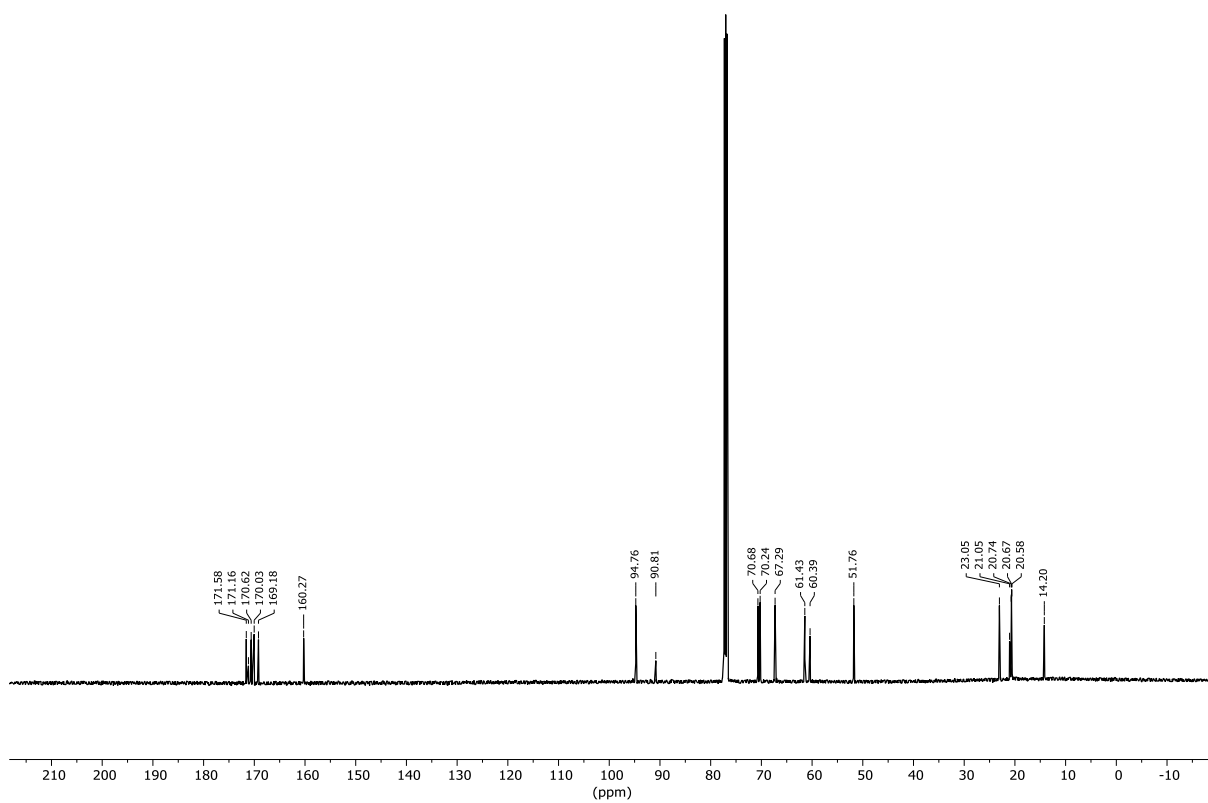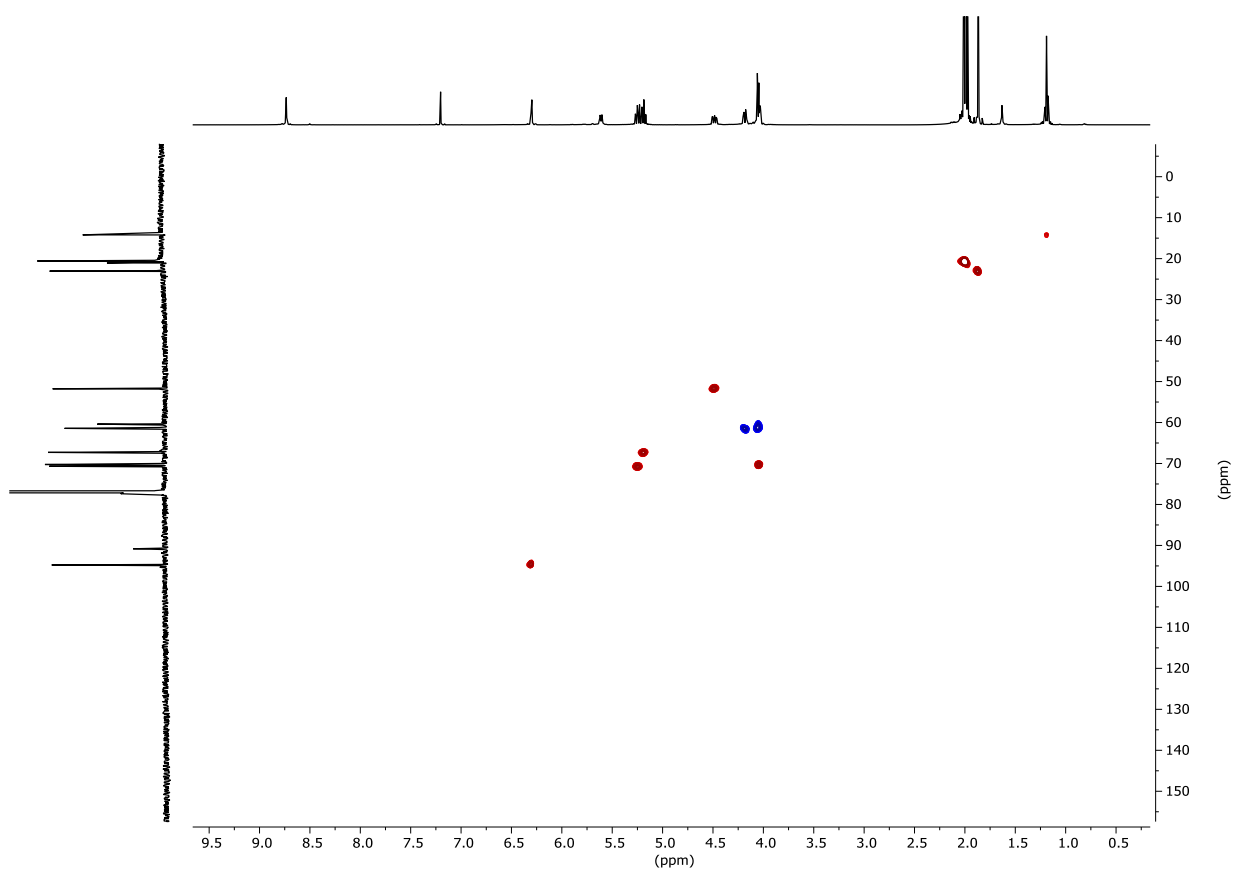

Compound 7

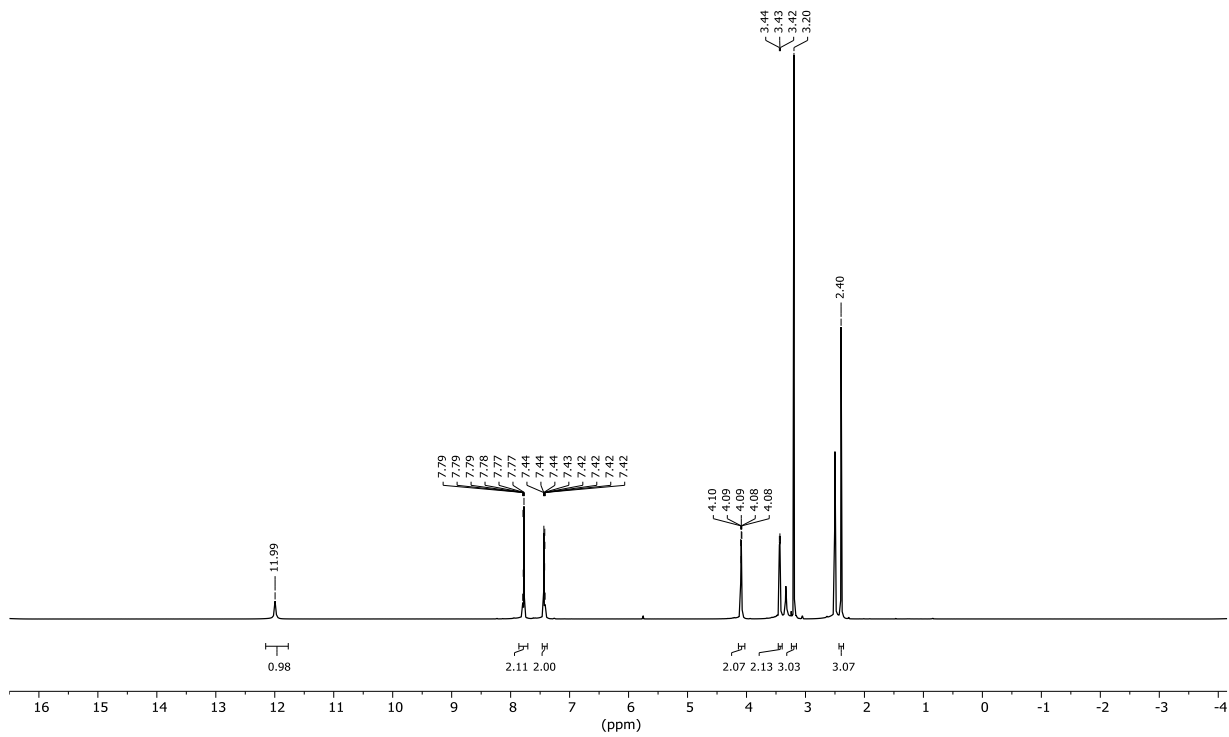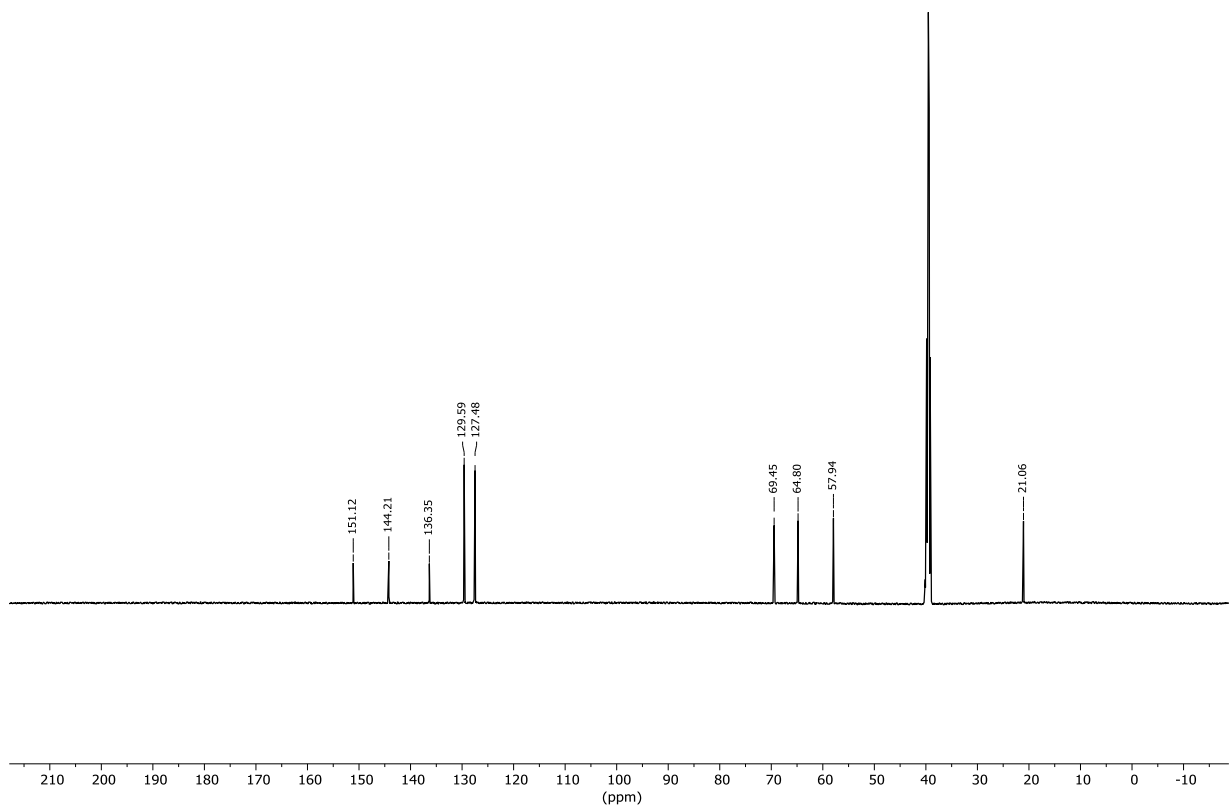



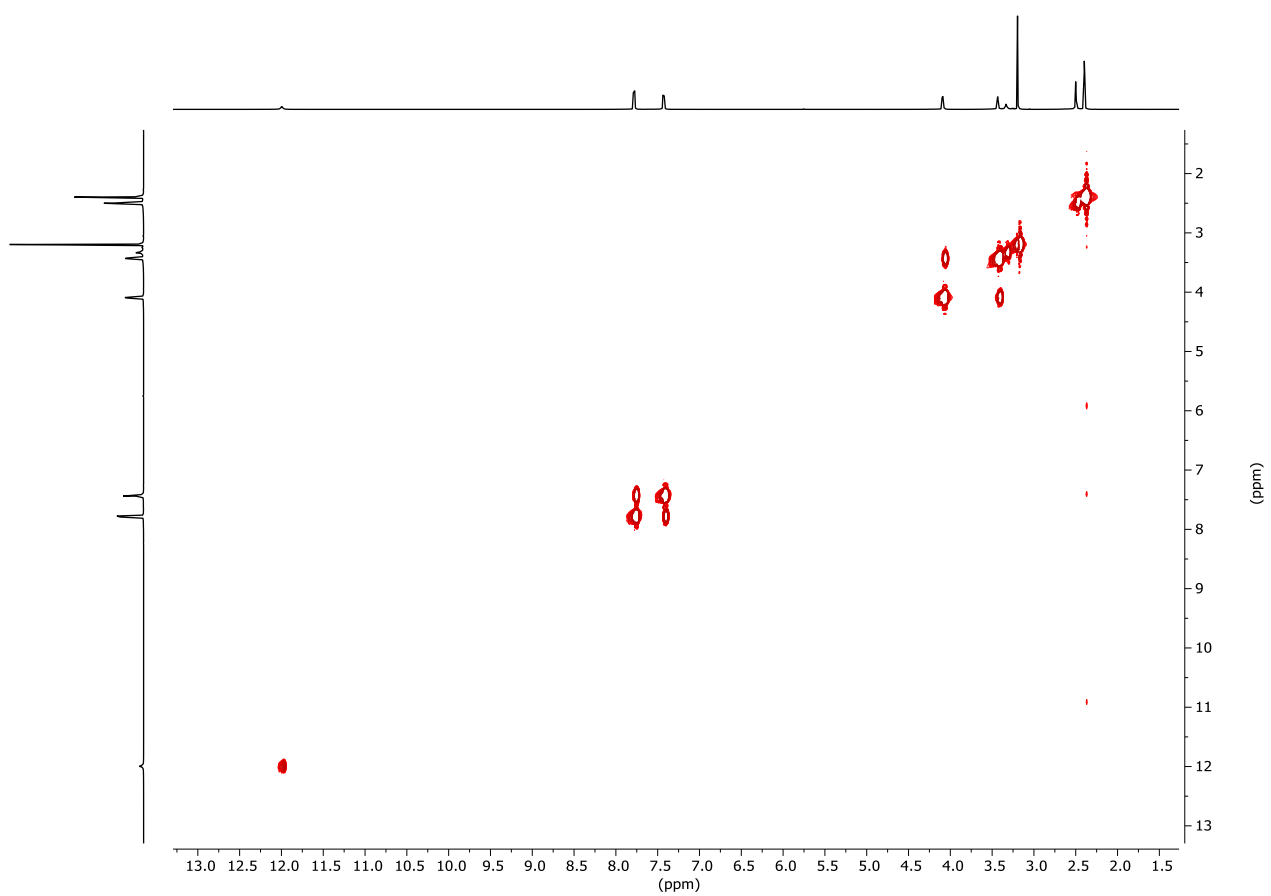

Compound 12

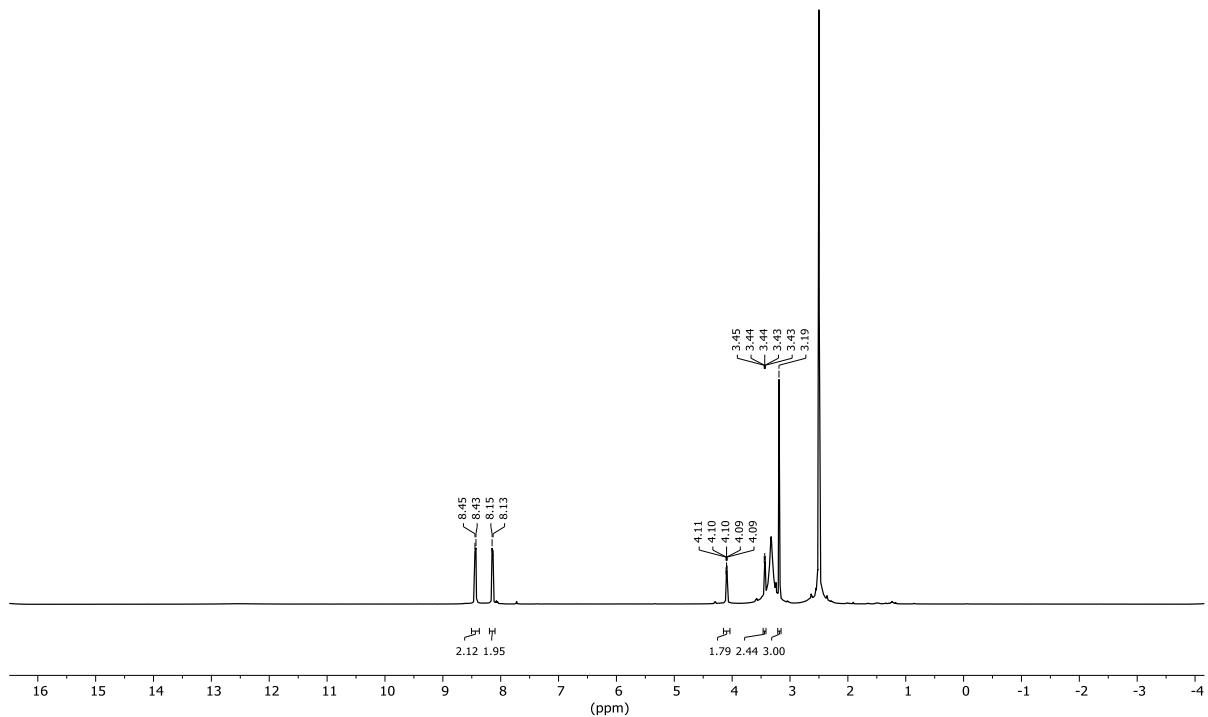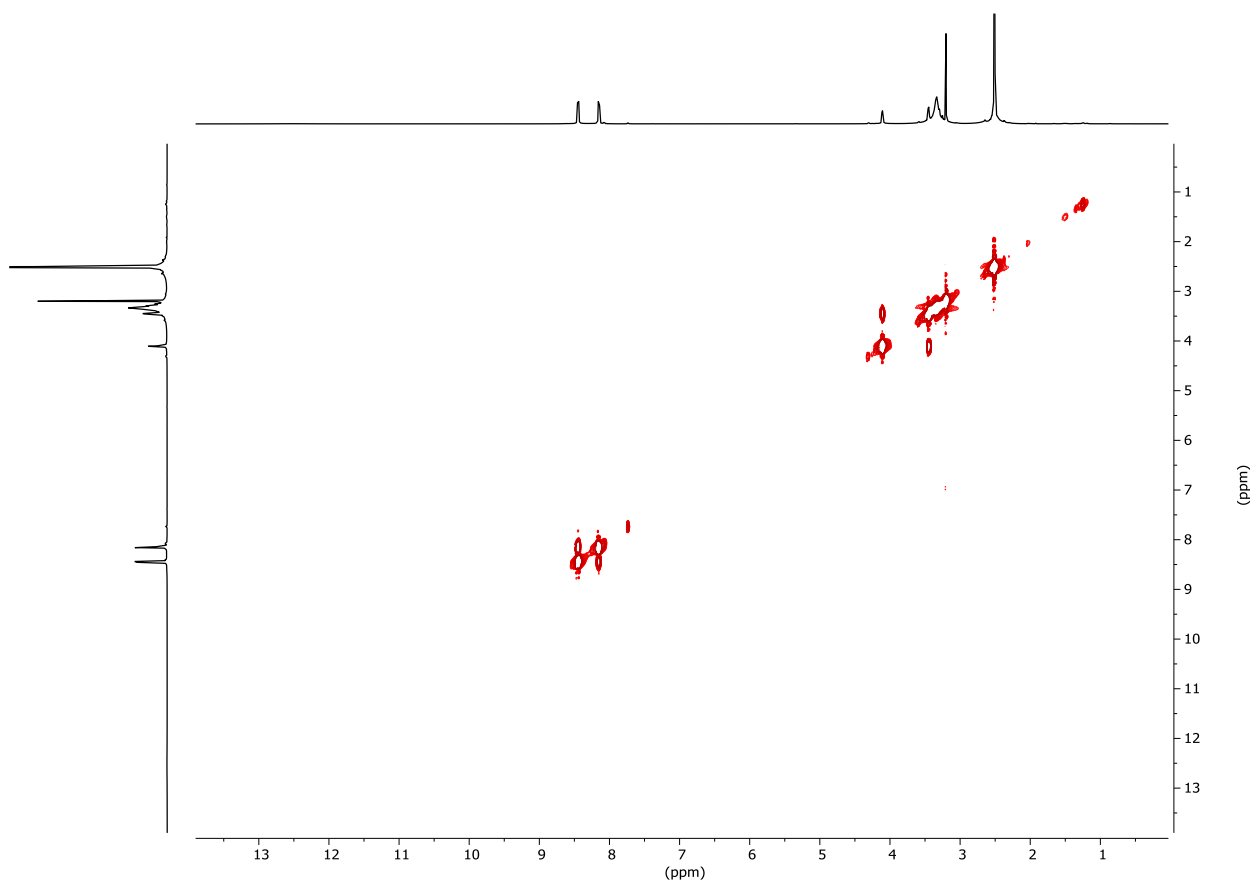

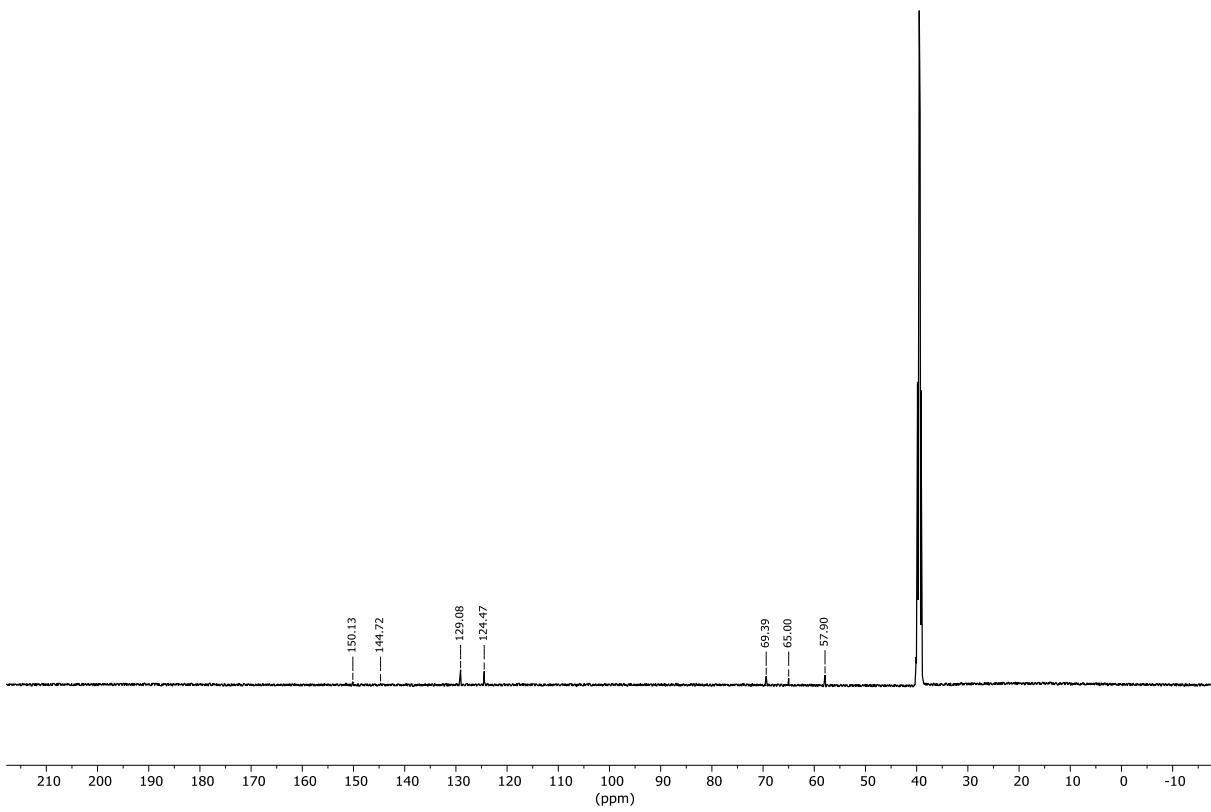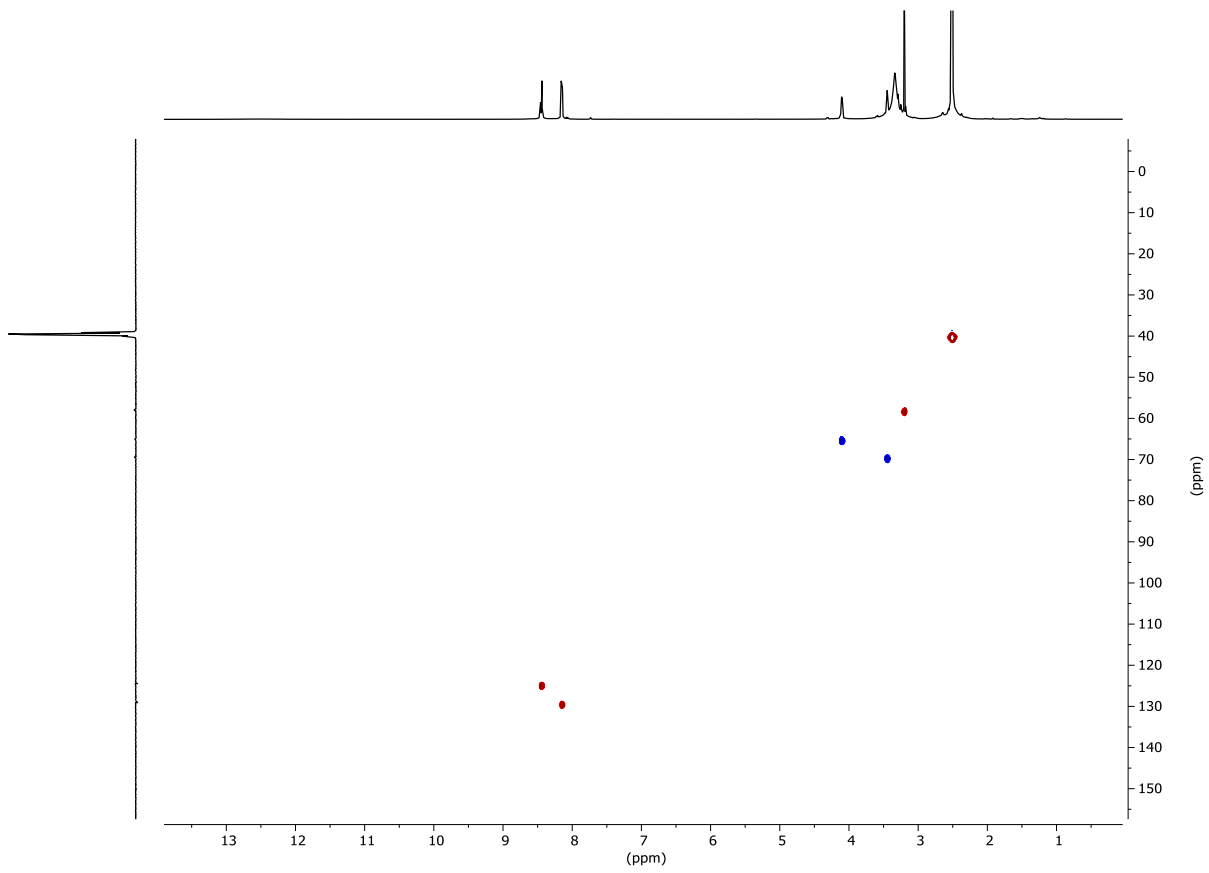

Compound 13

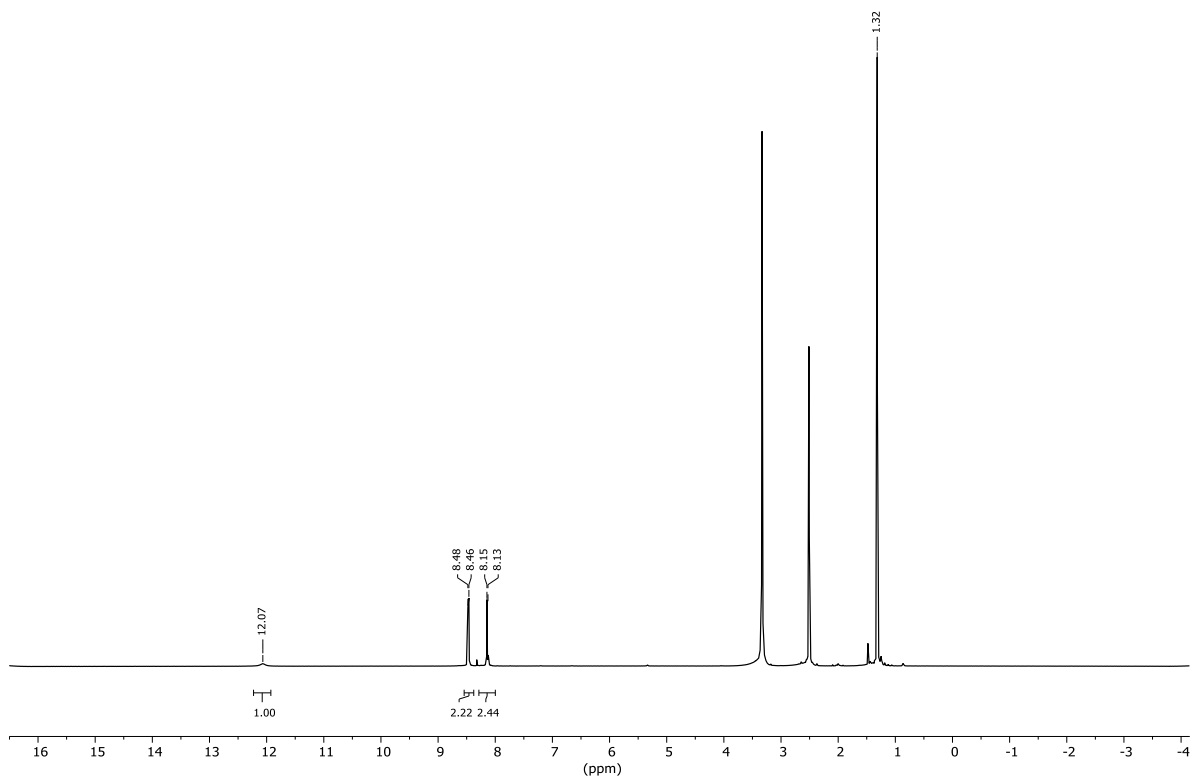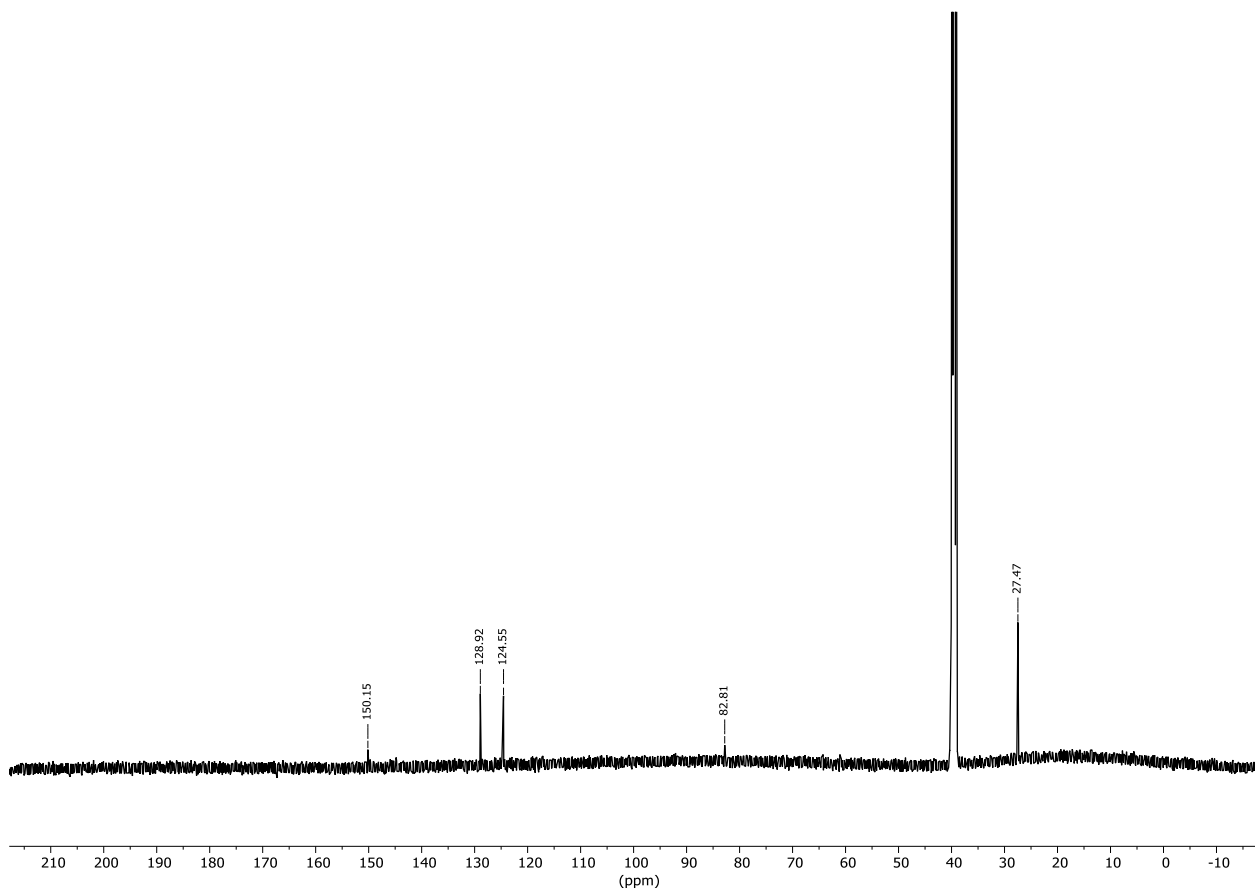

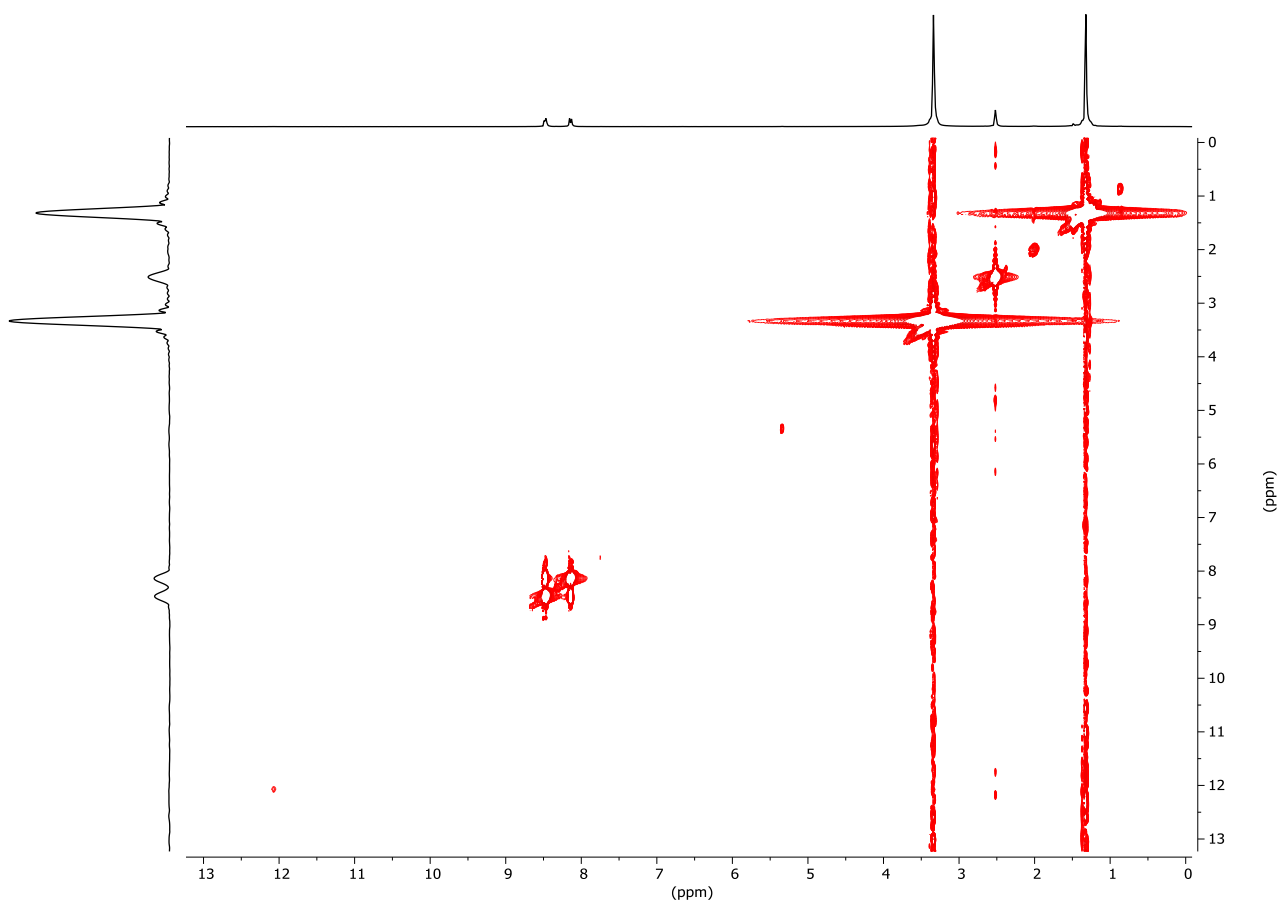

Compound 14

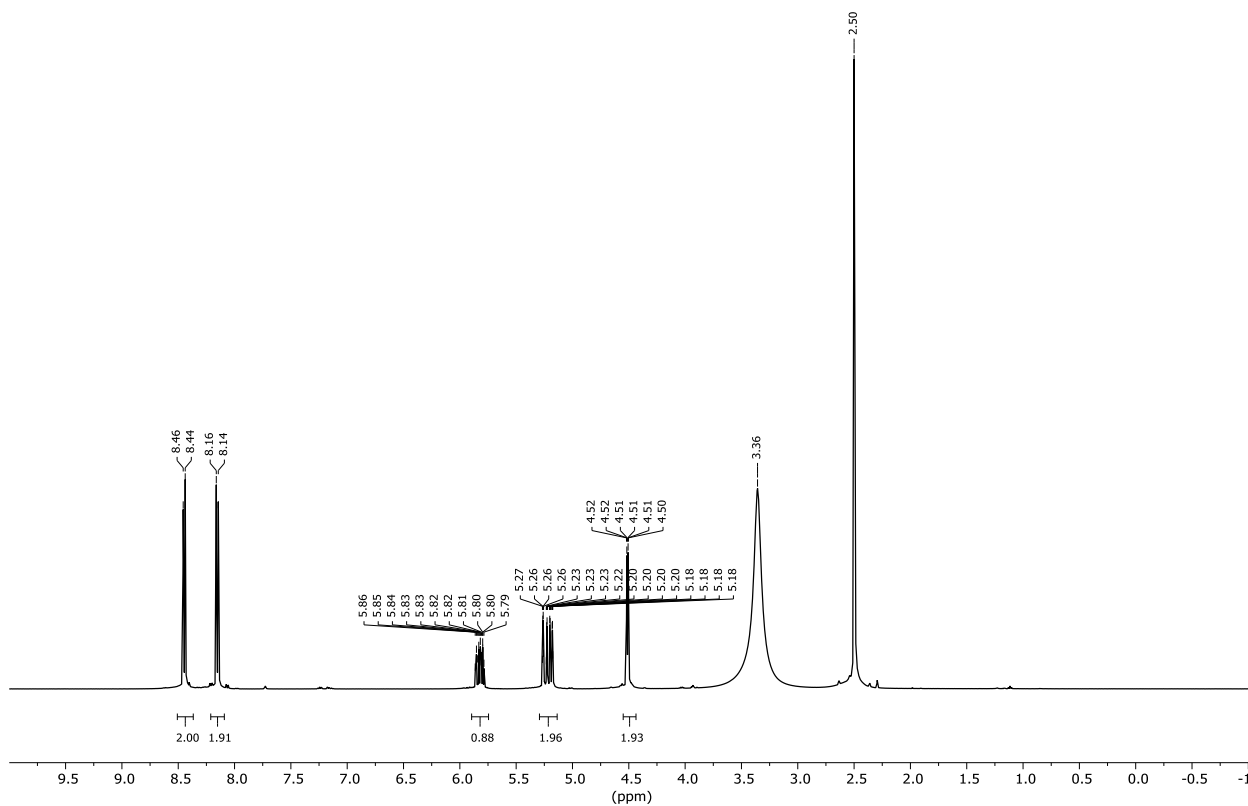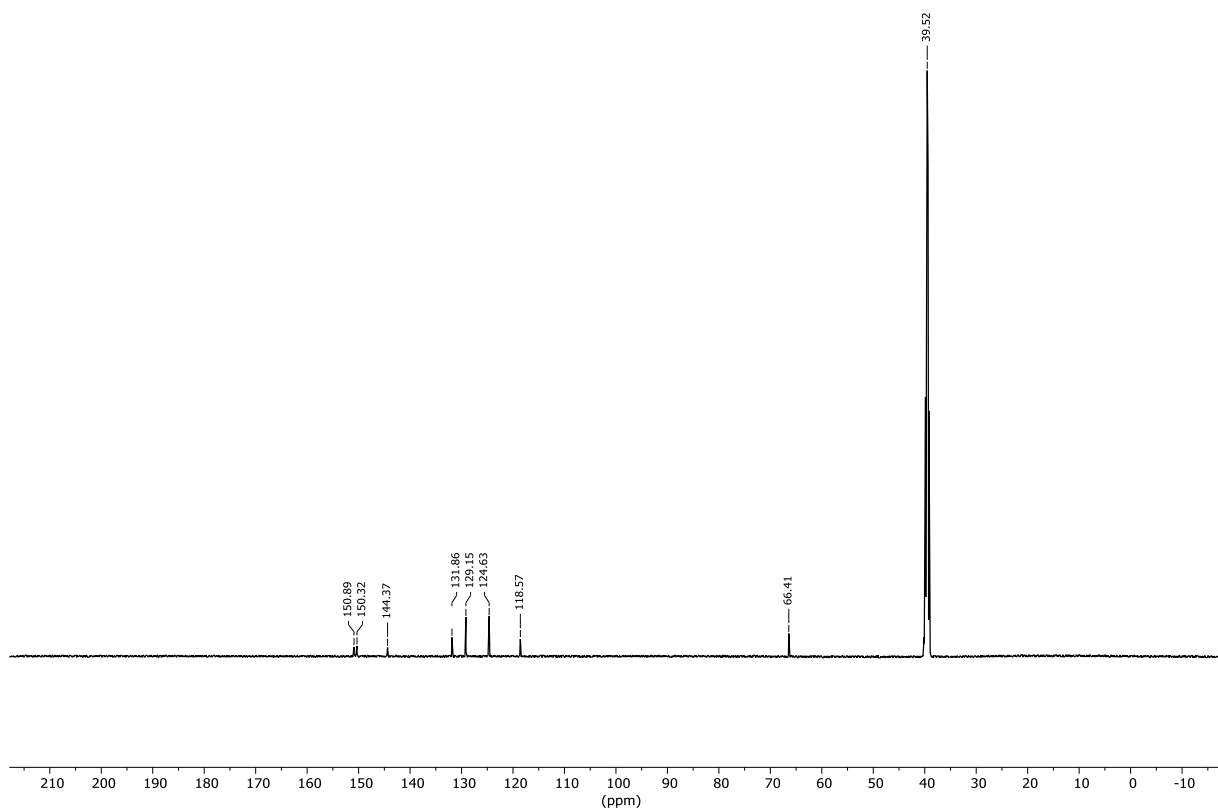

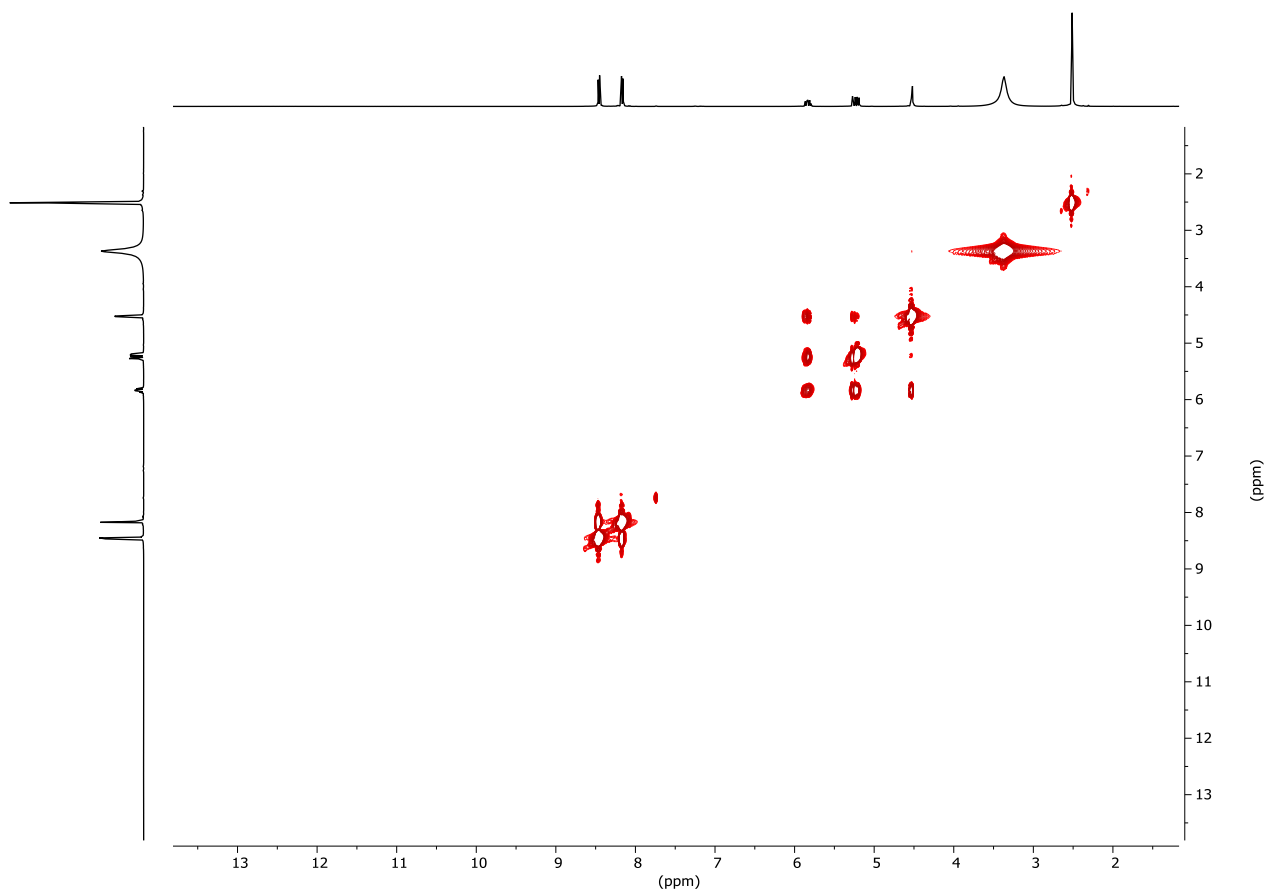

# Compound 15

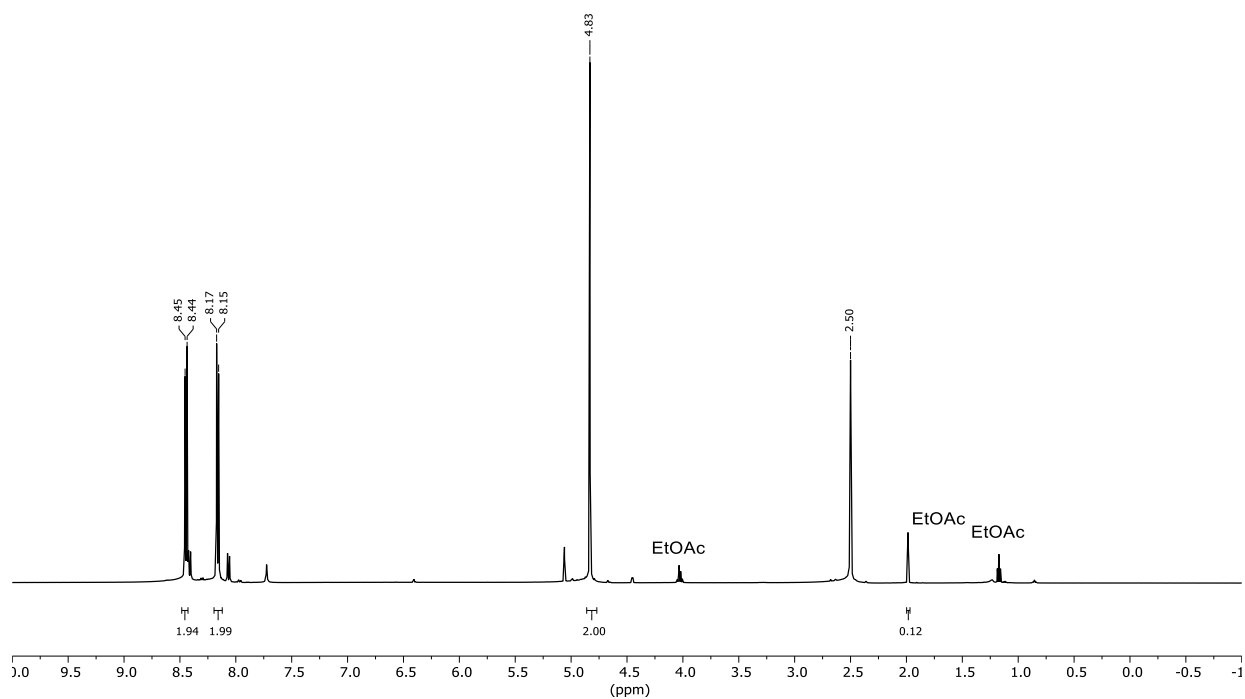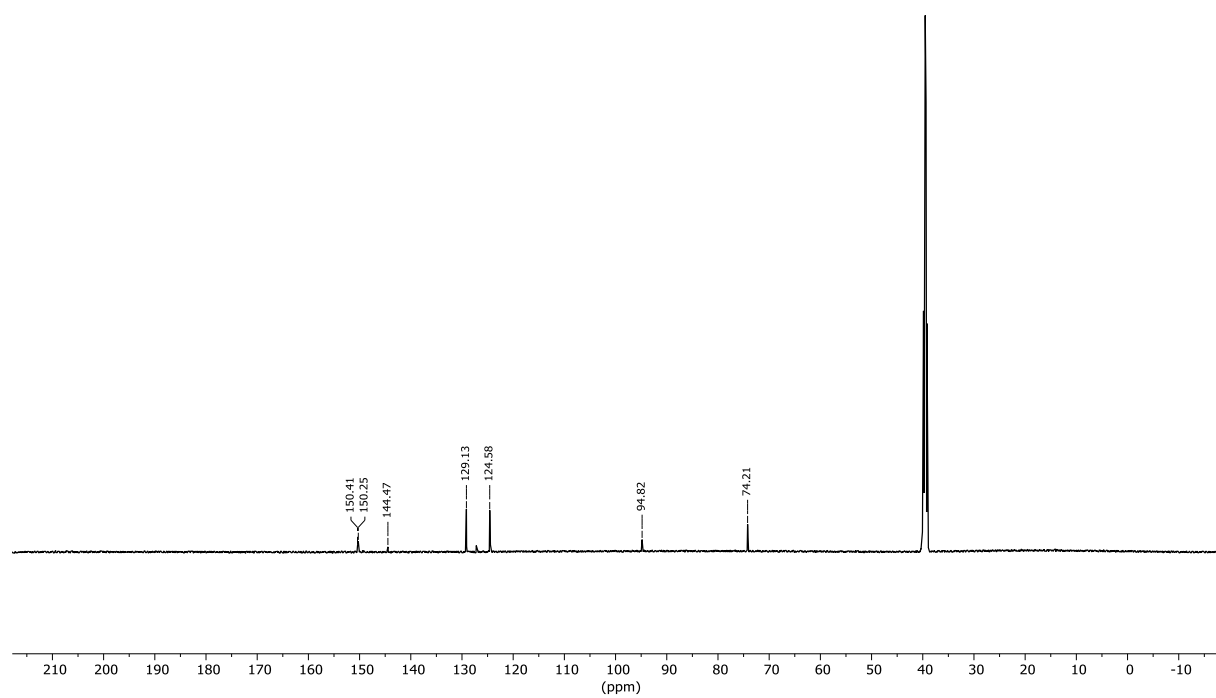





Compound 16

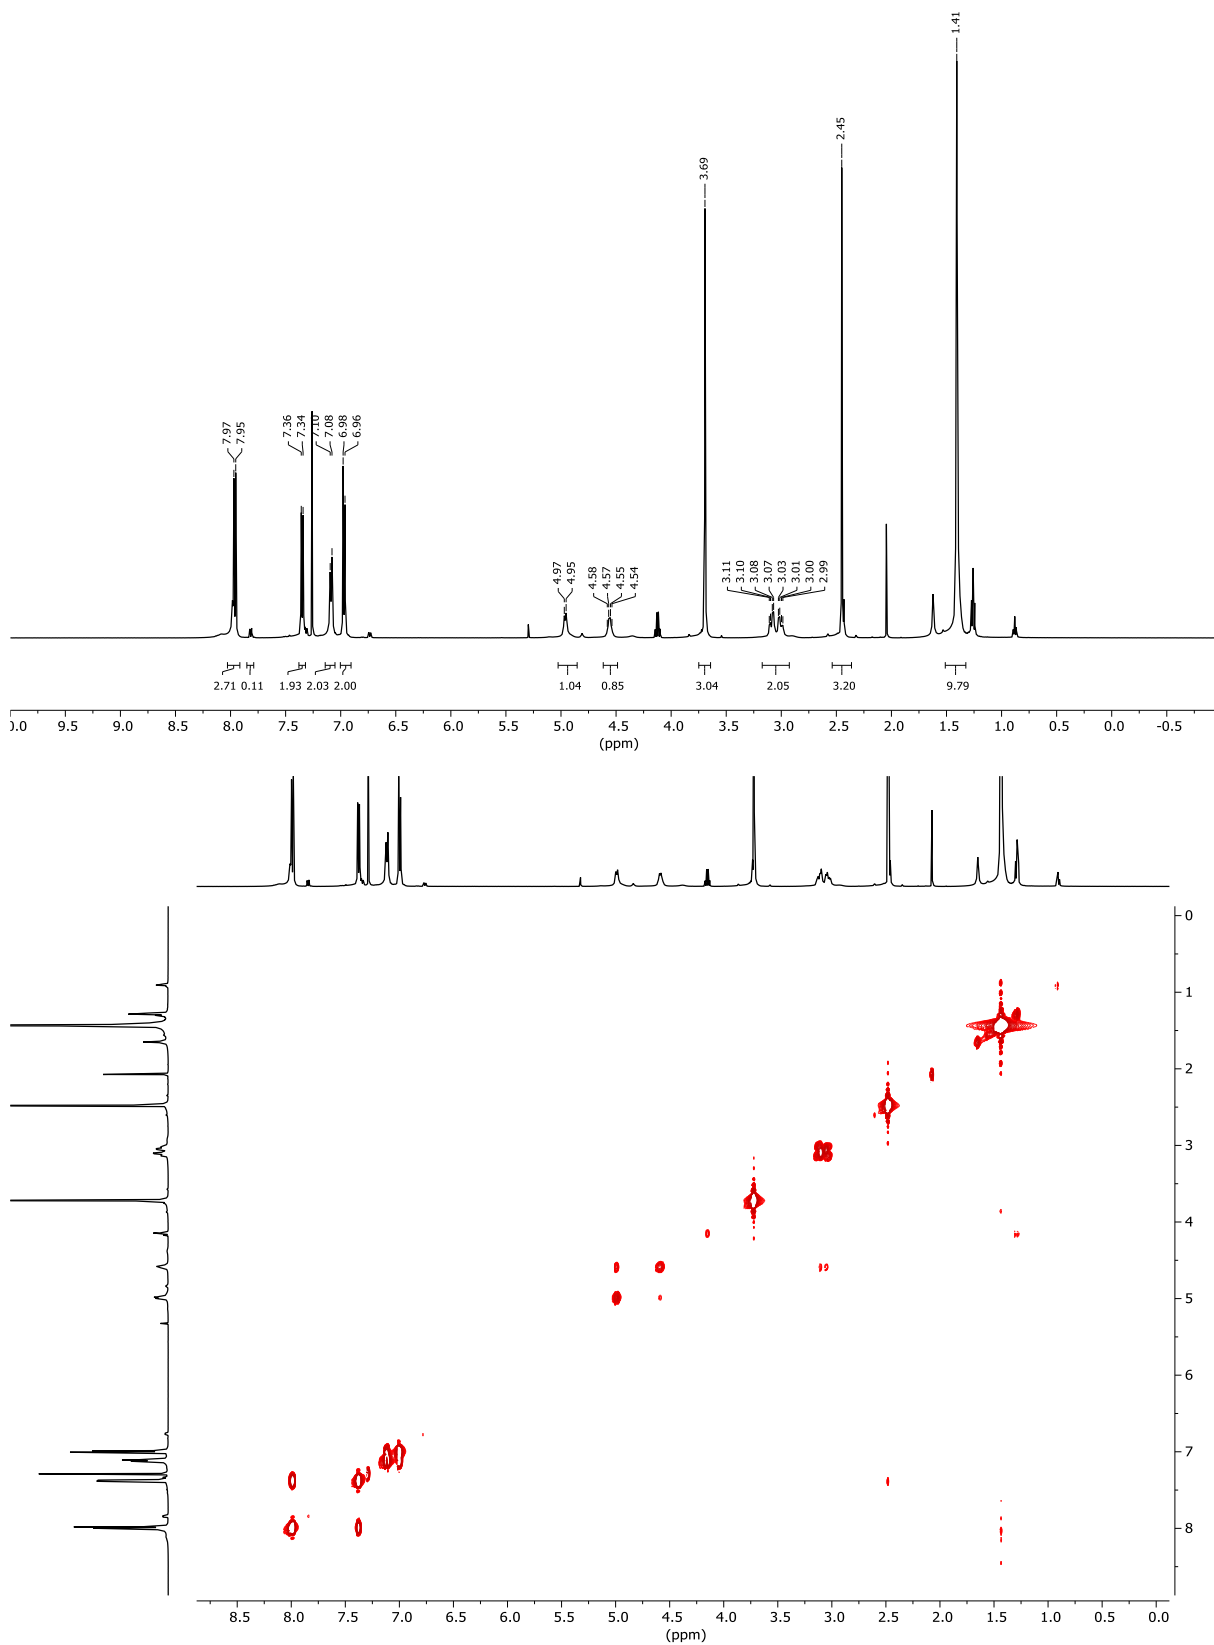

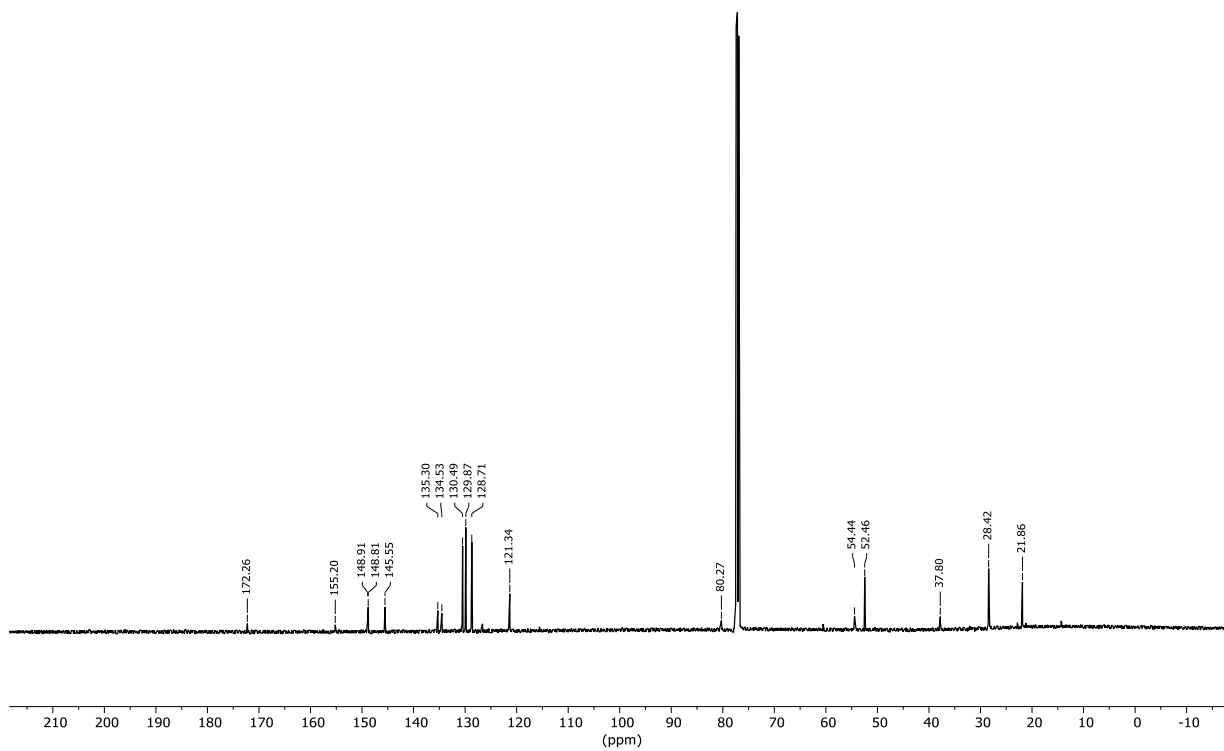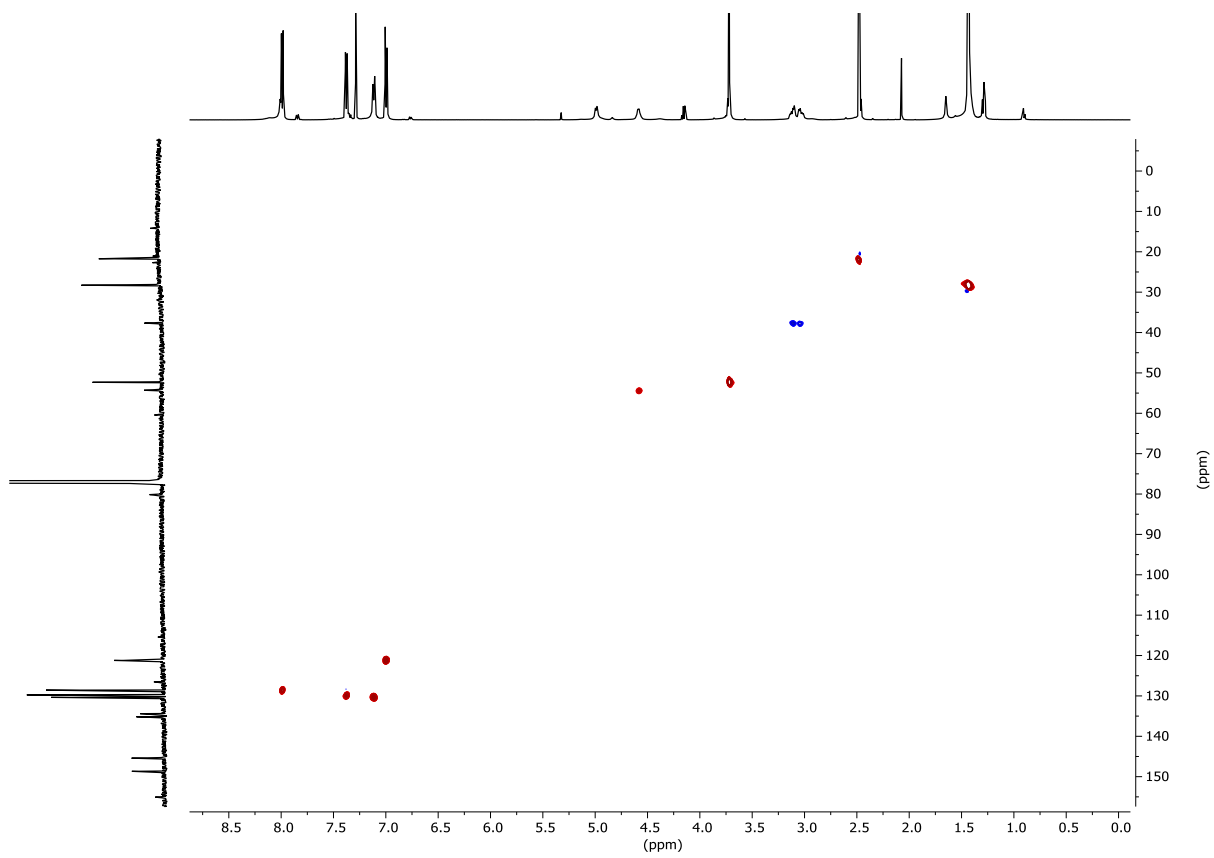

Compound 17

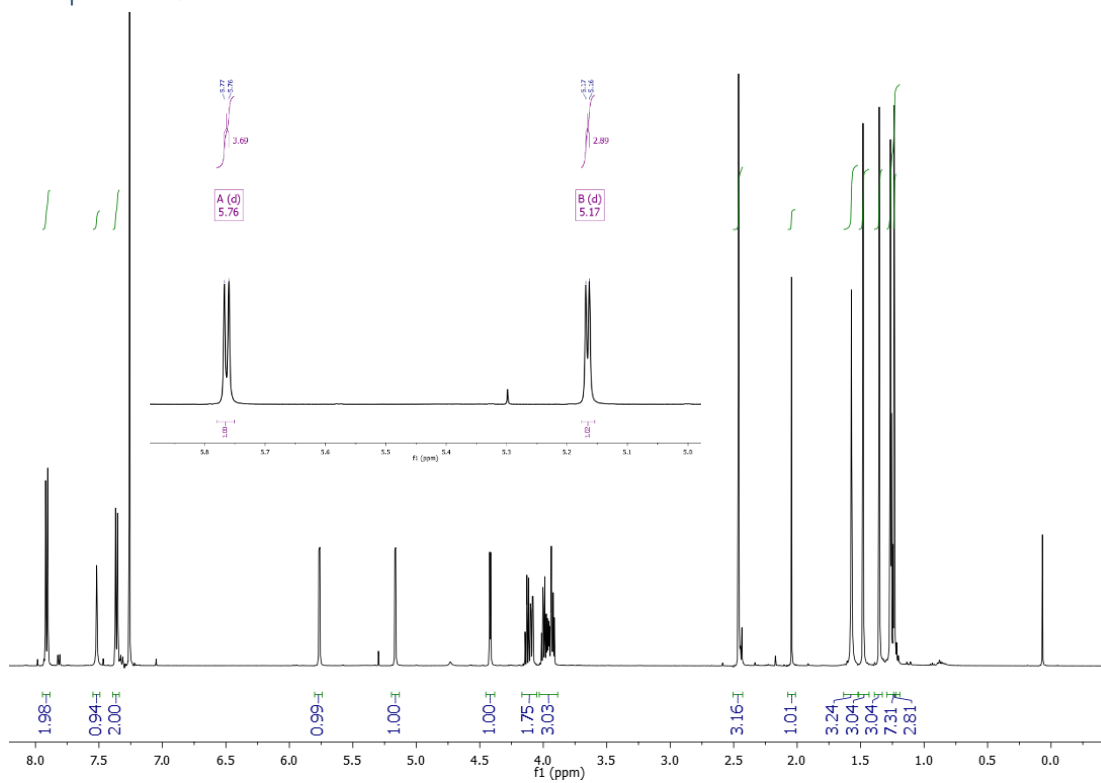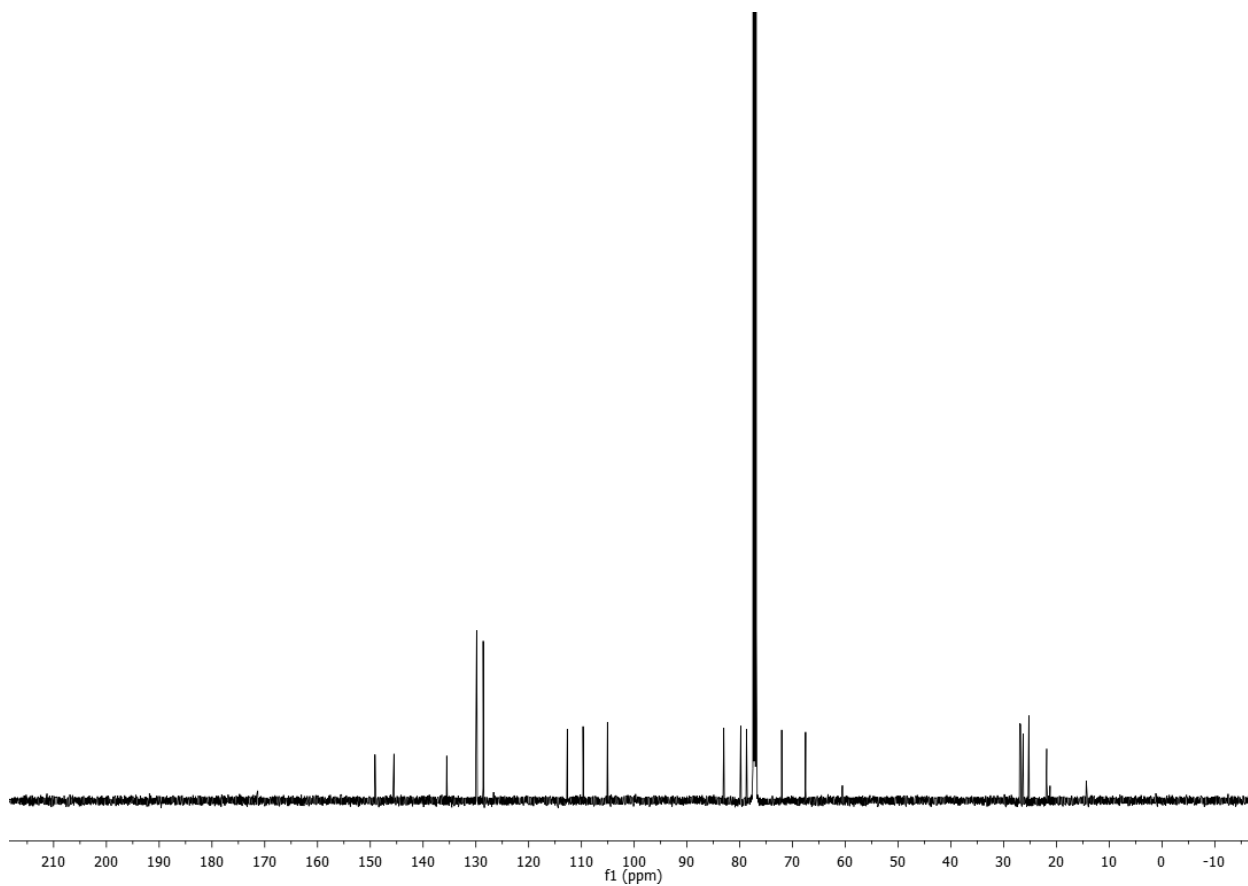

Compound 18

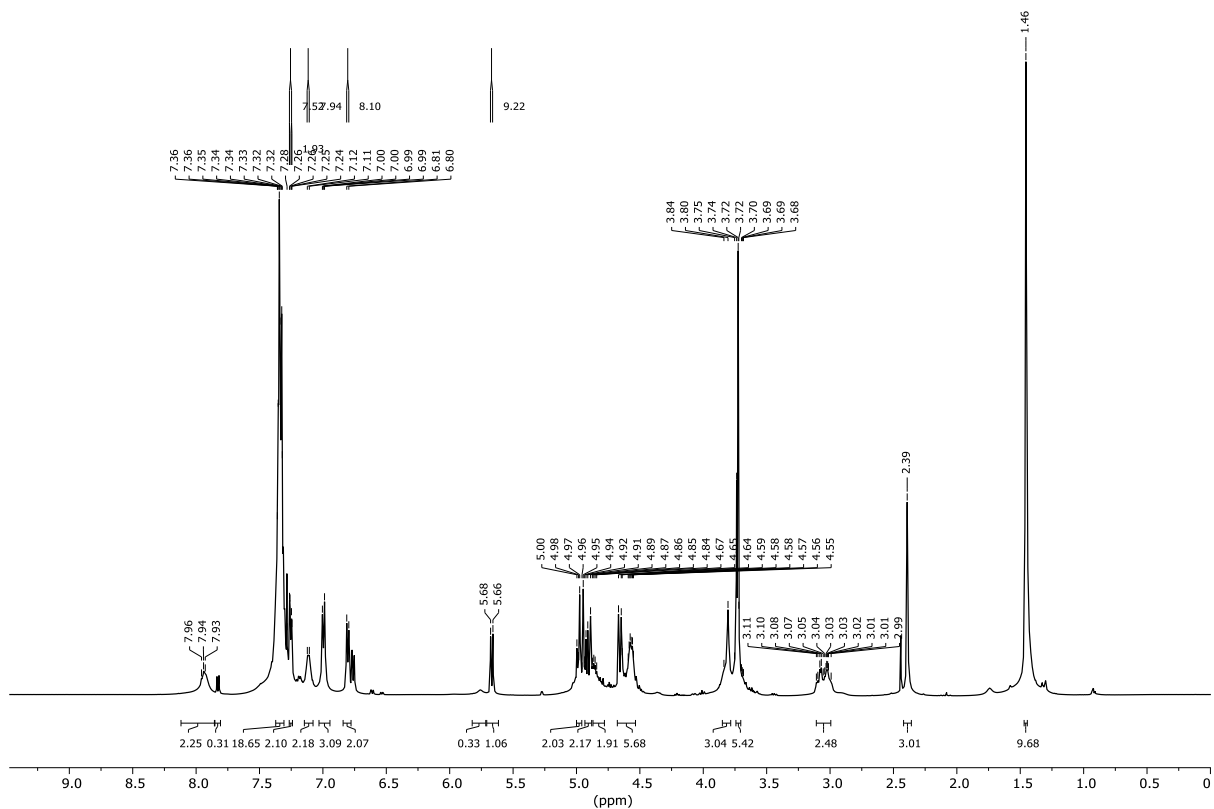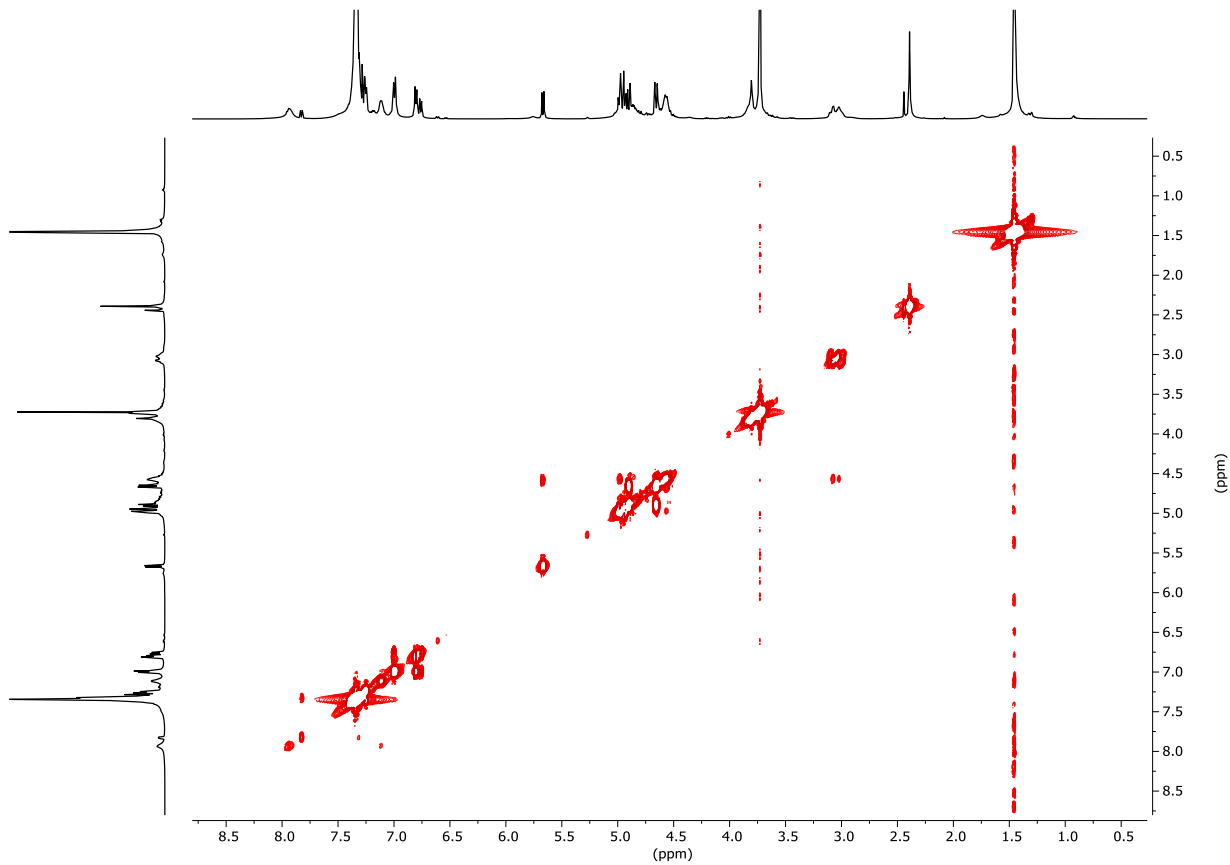

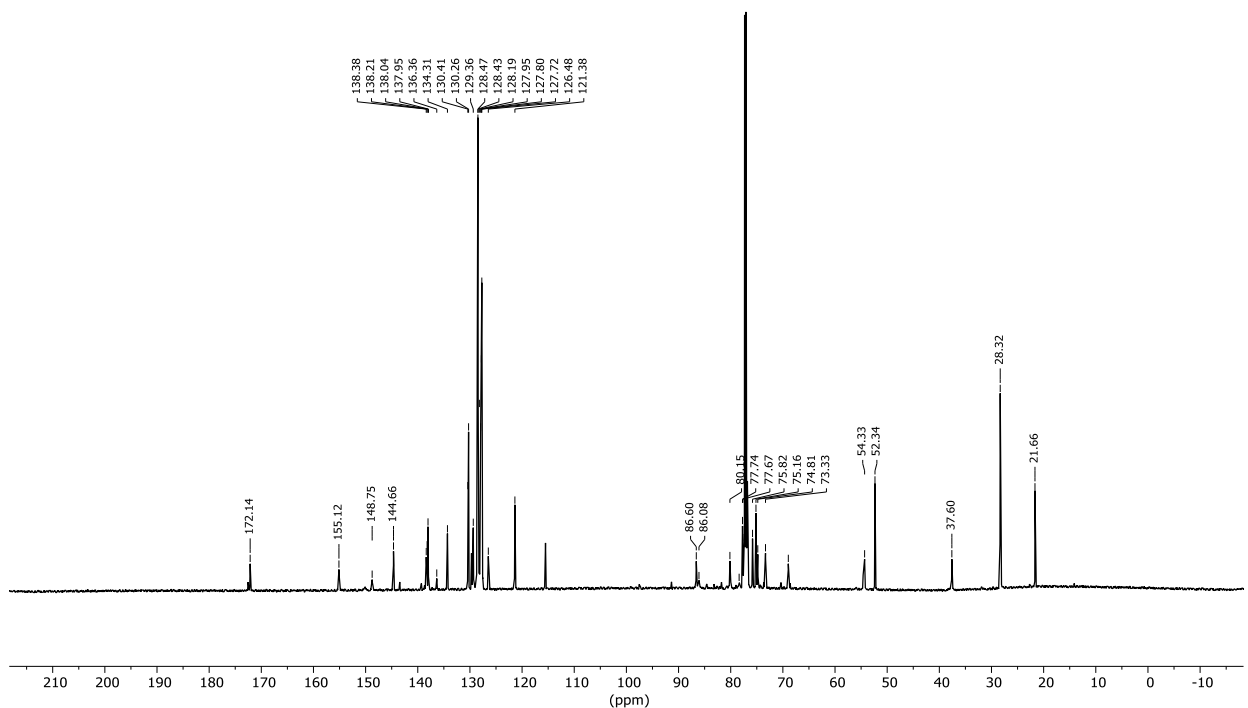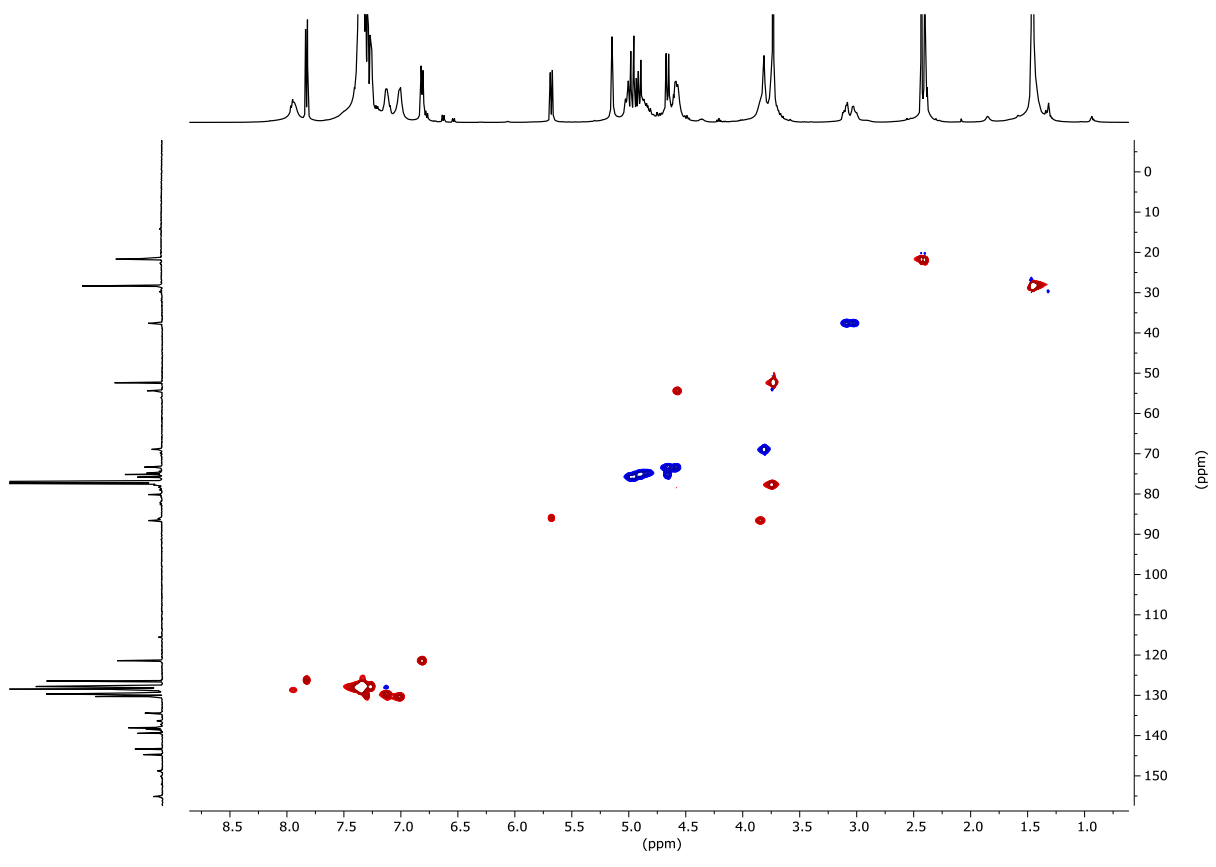

Compound 19

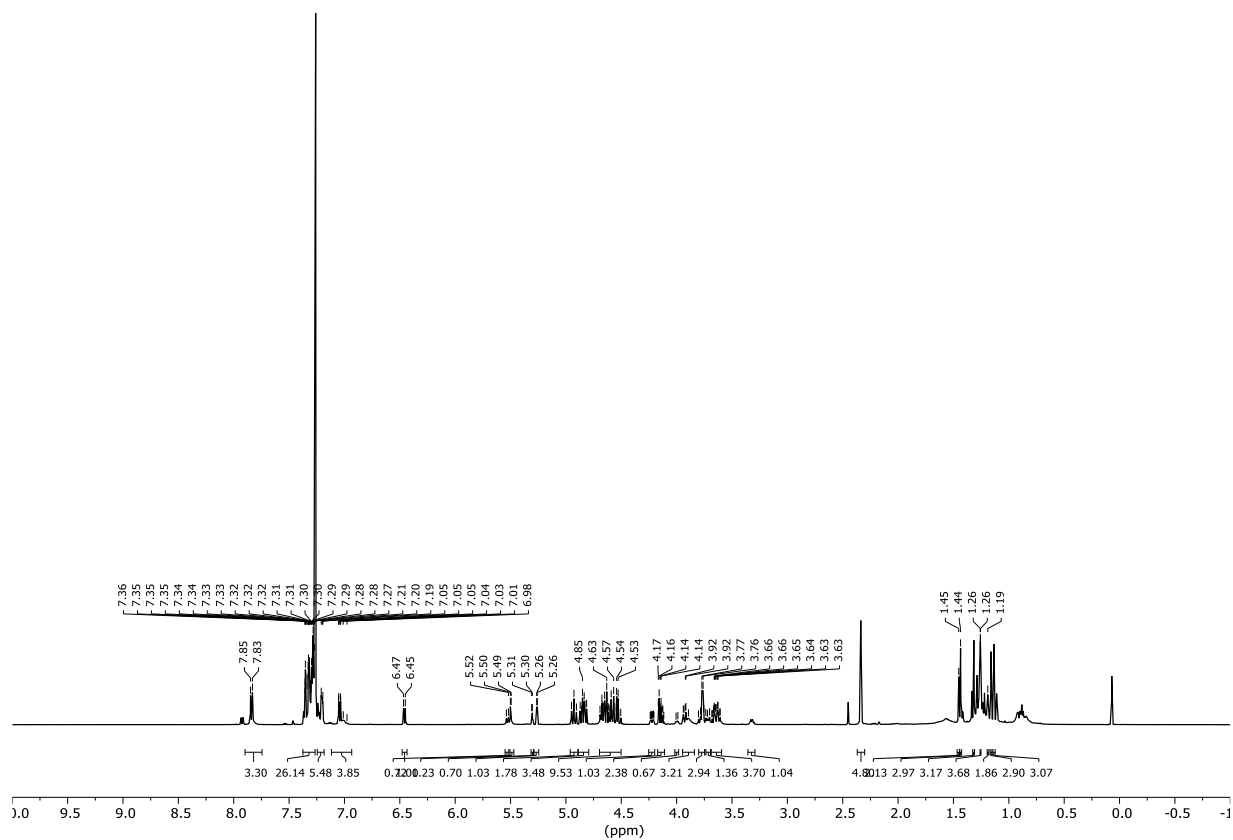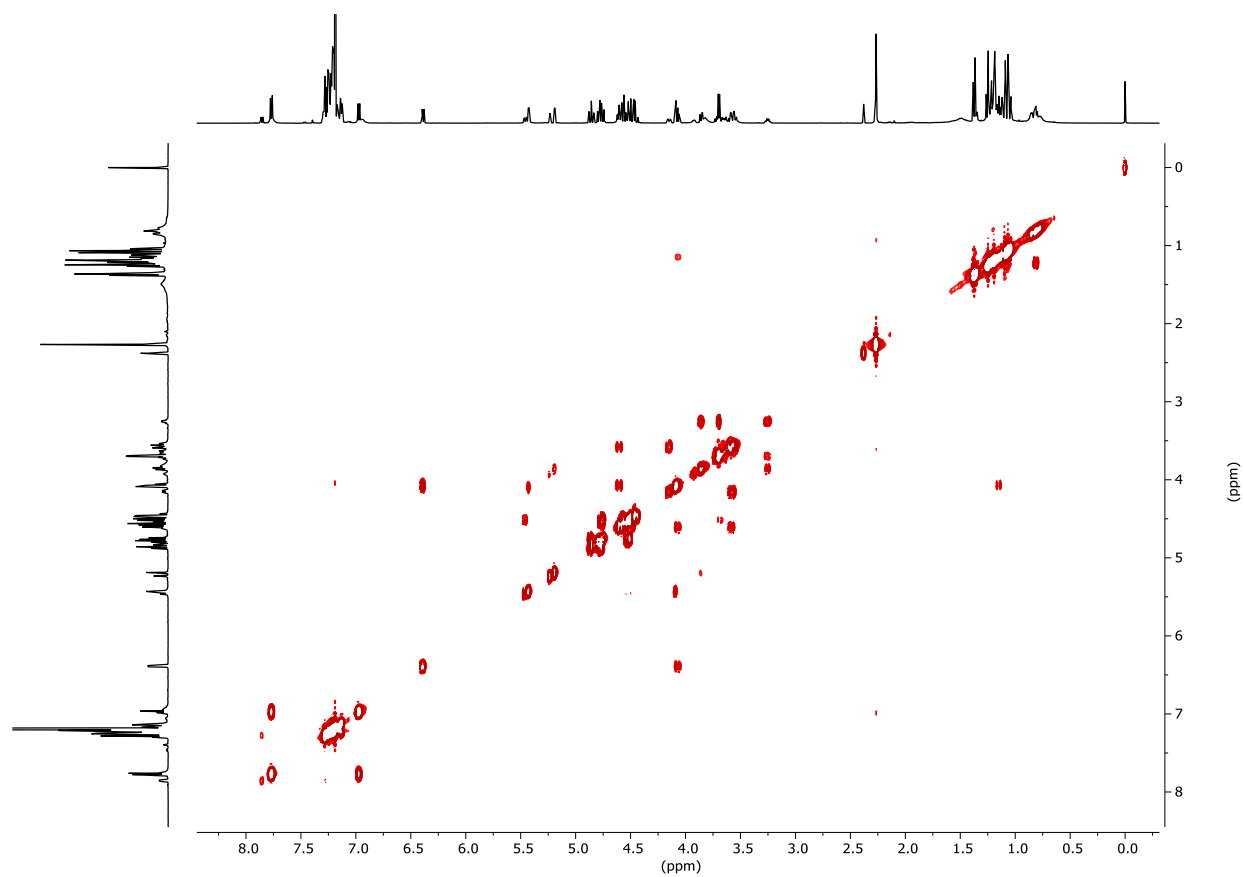

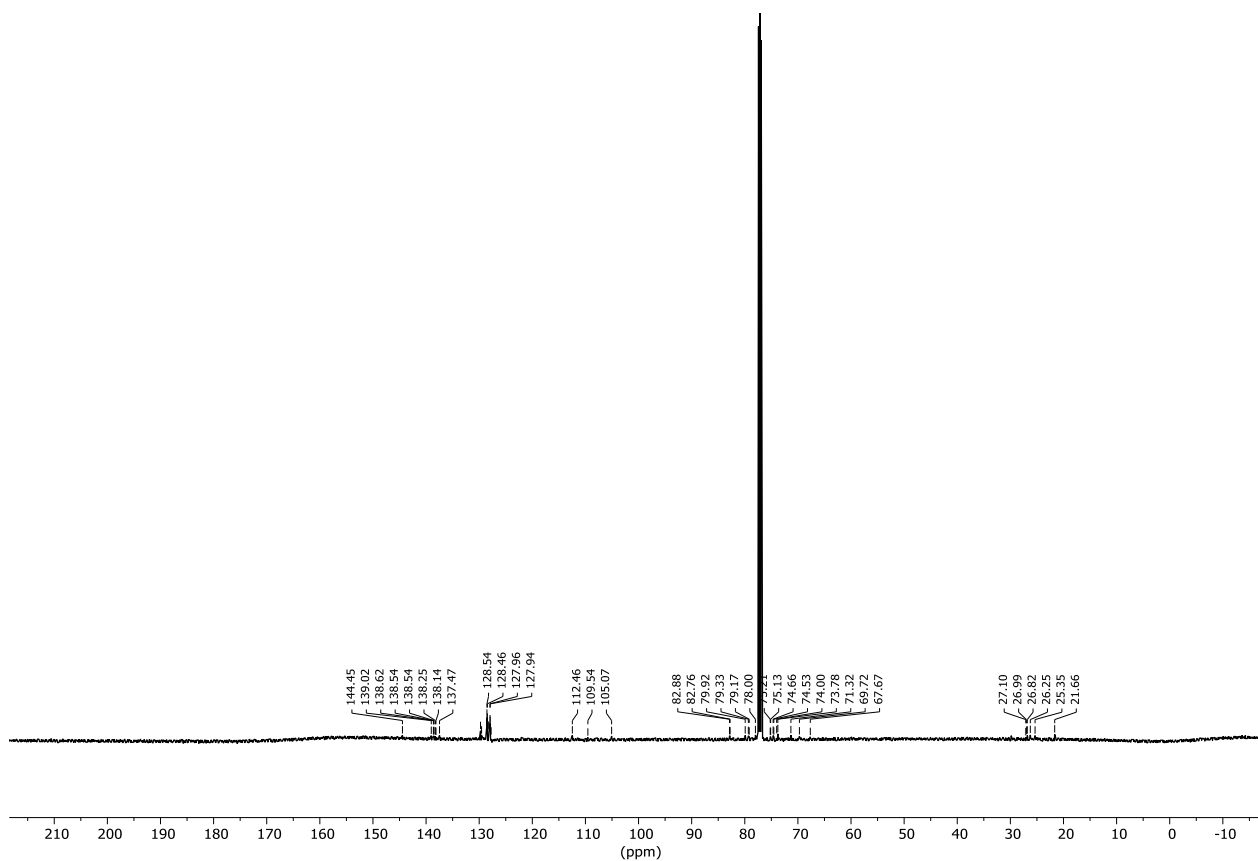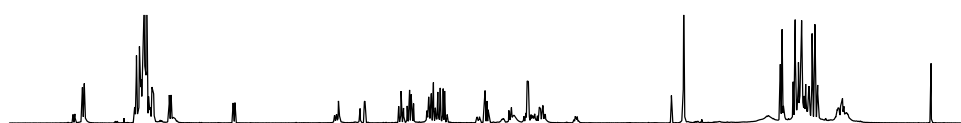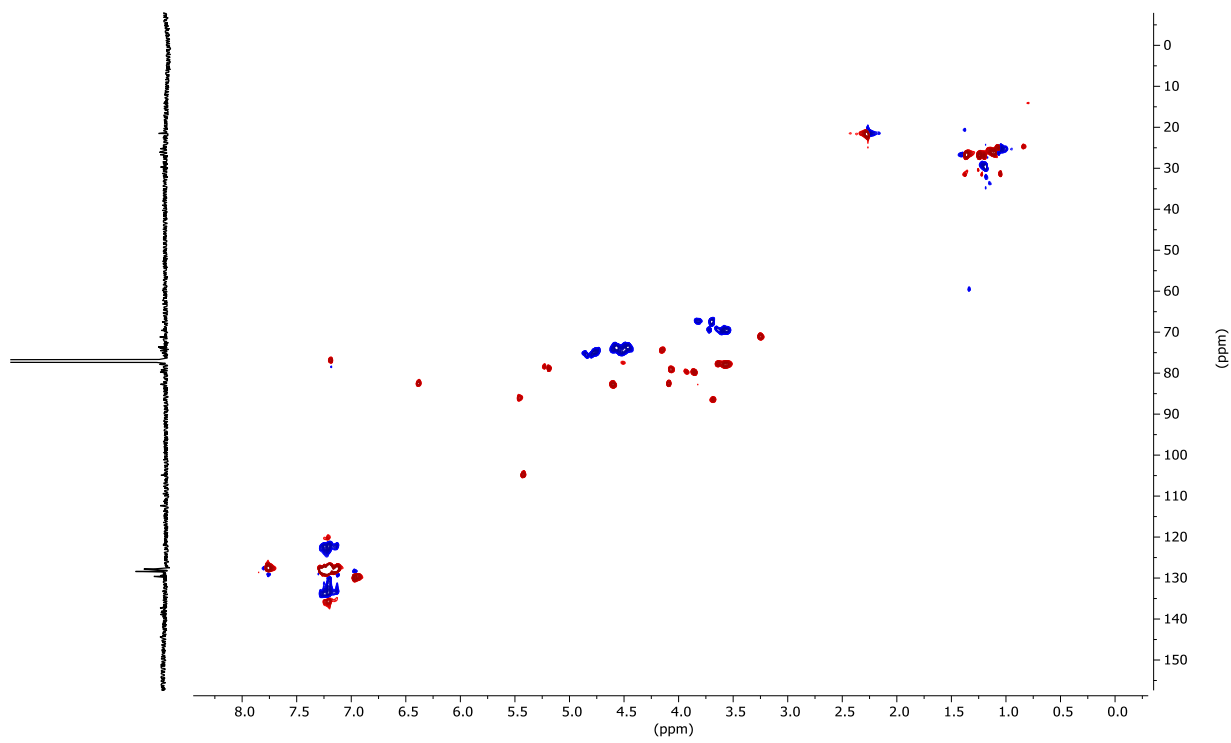



Compound 20

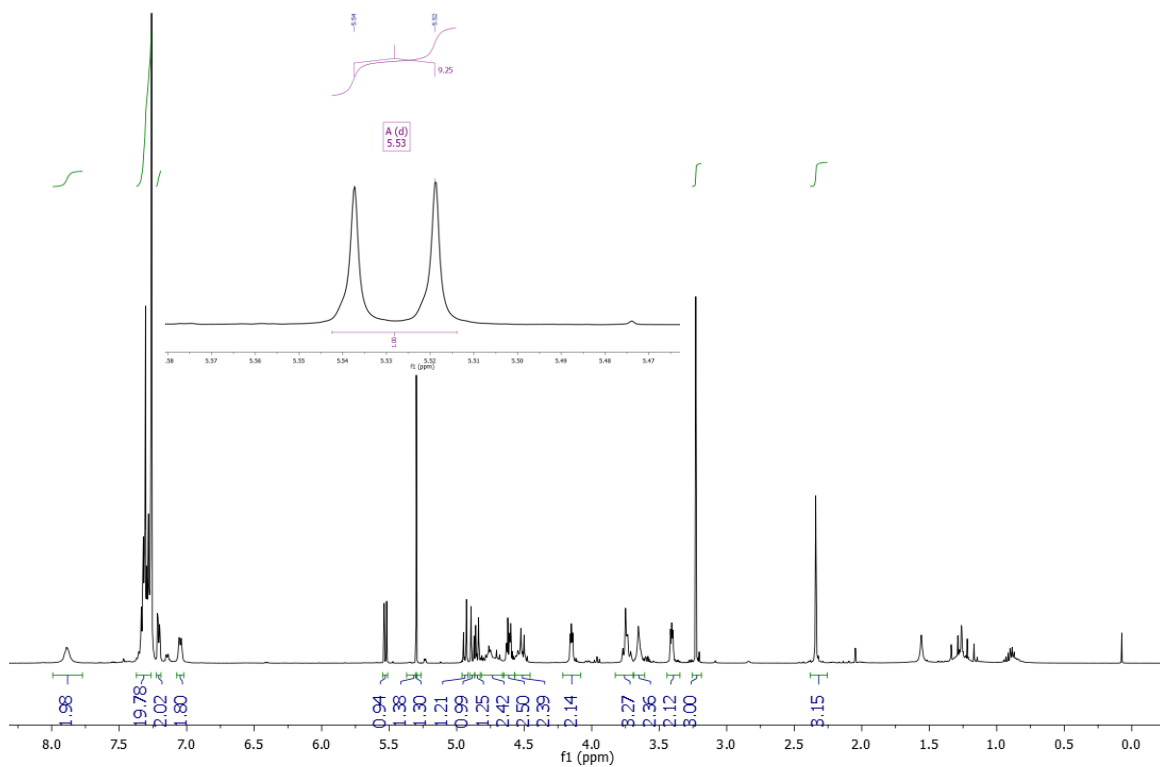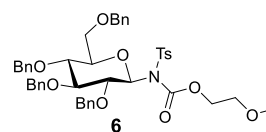

<sup>13</sup>C NMR (126 MHz, CDCl<sub>3</sub>)

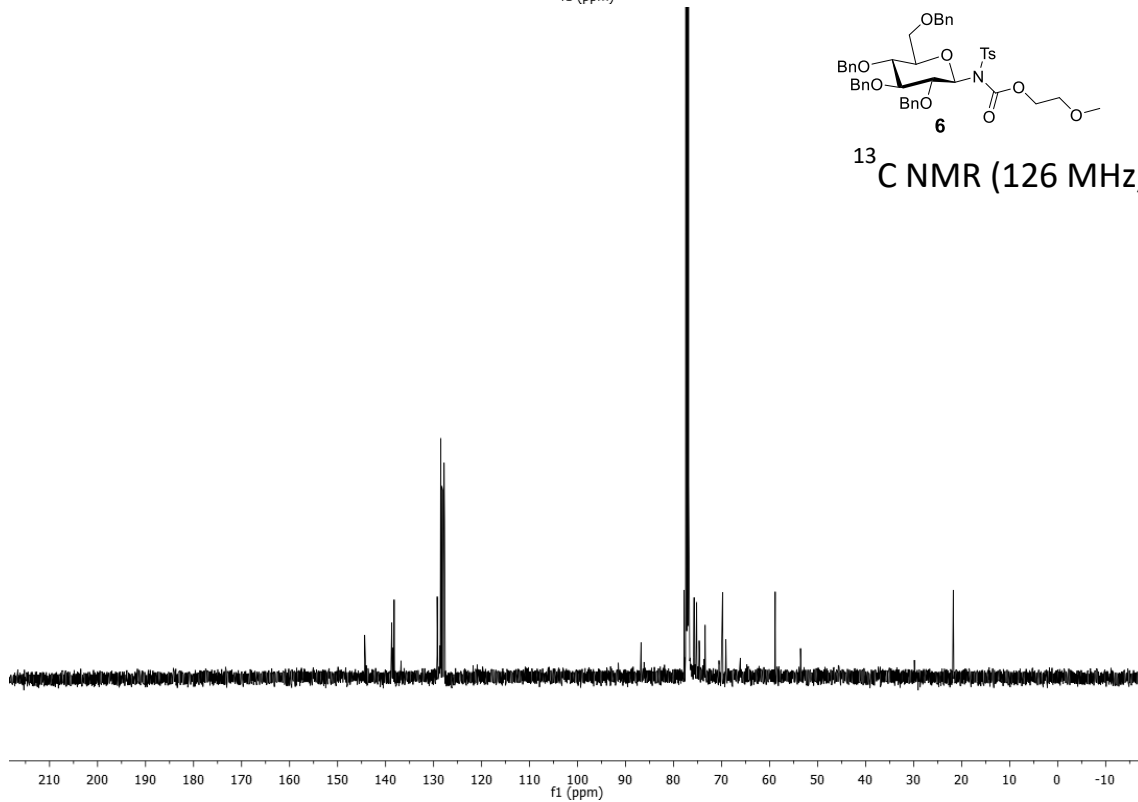

Compound 21

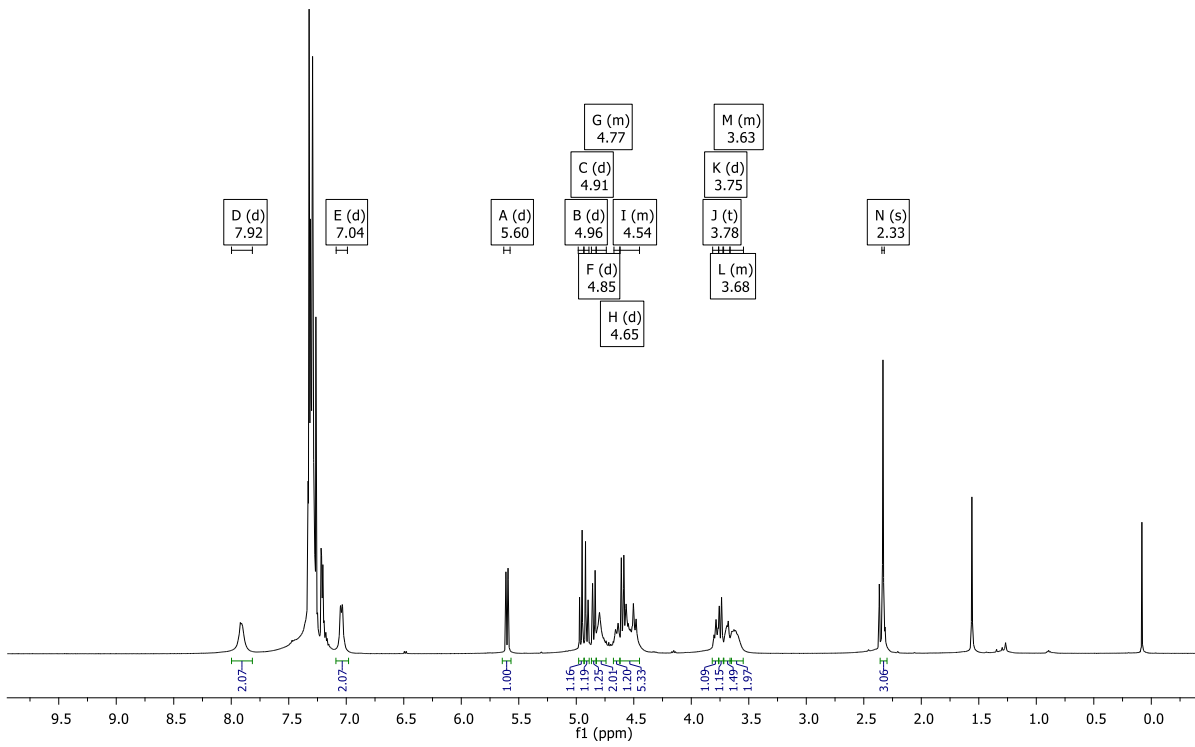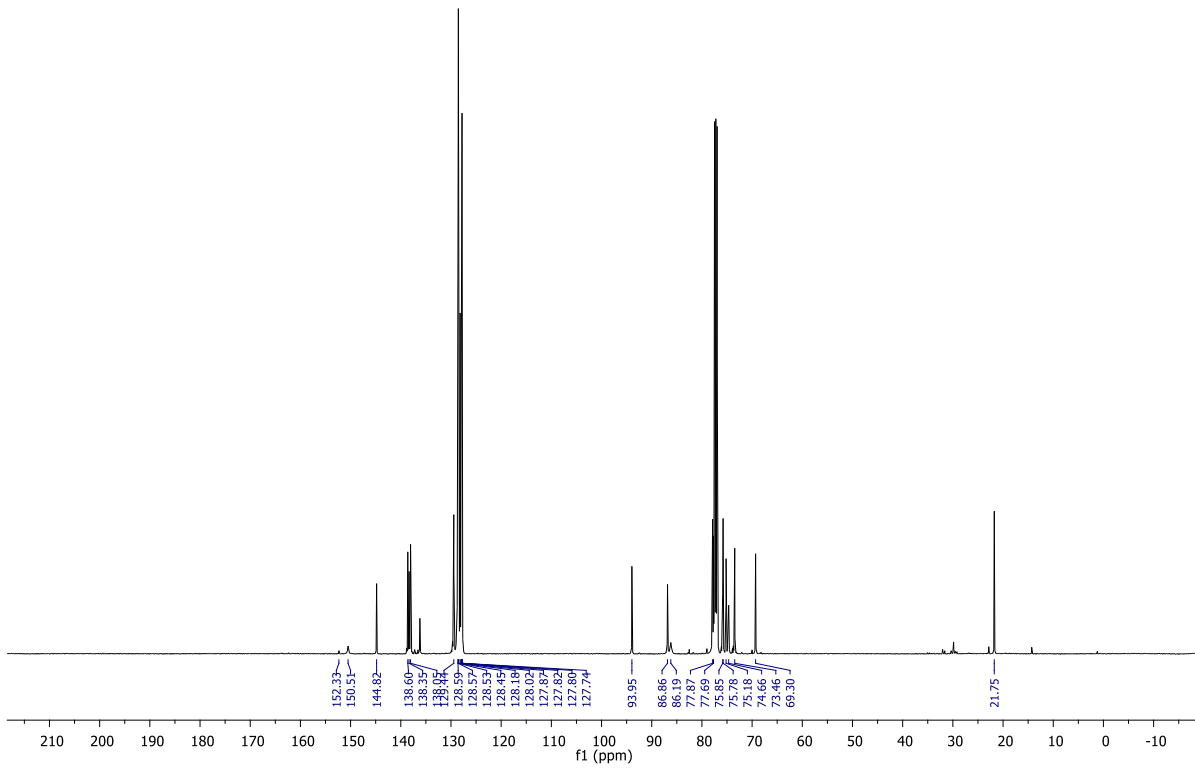

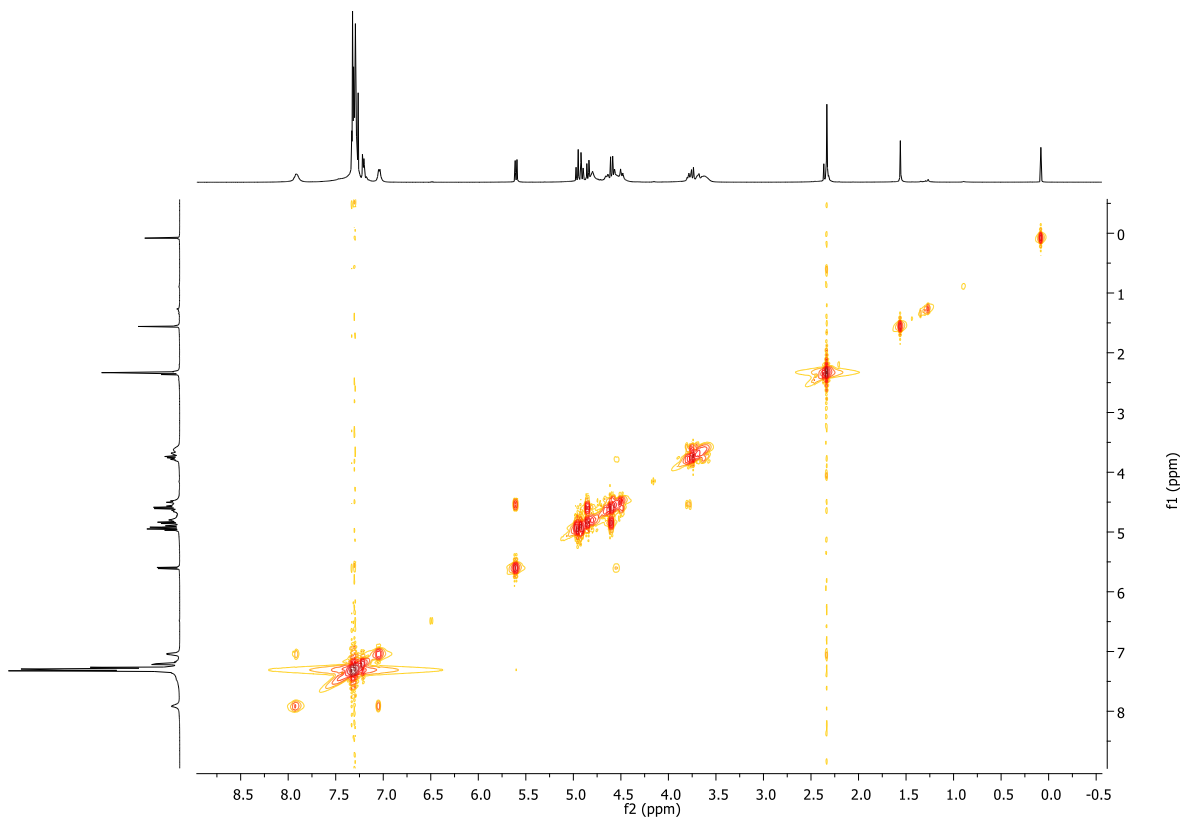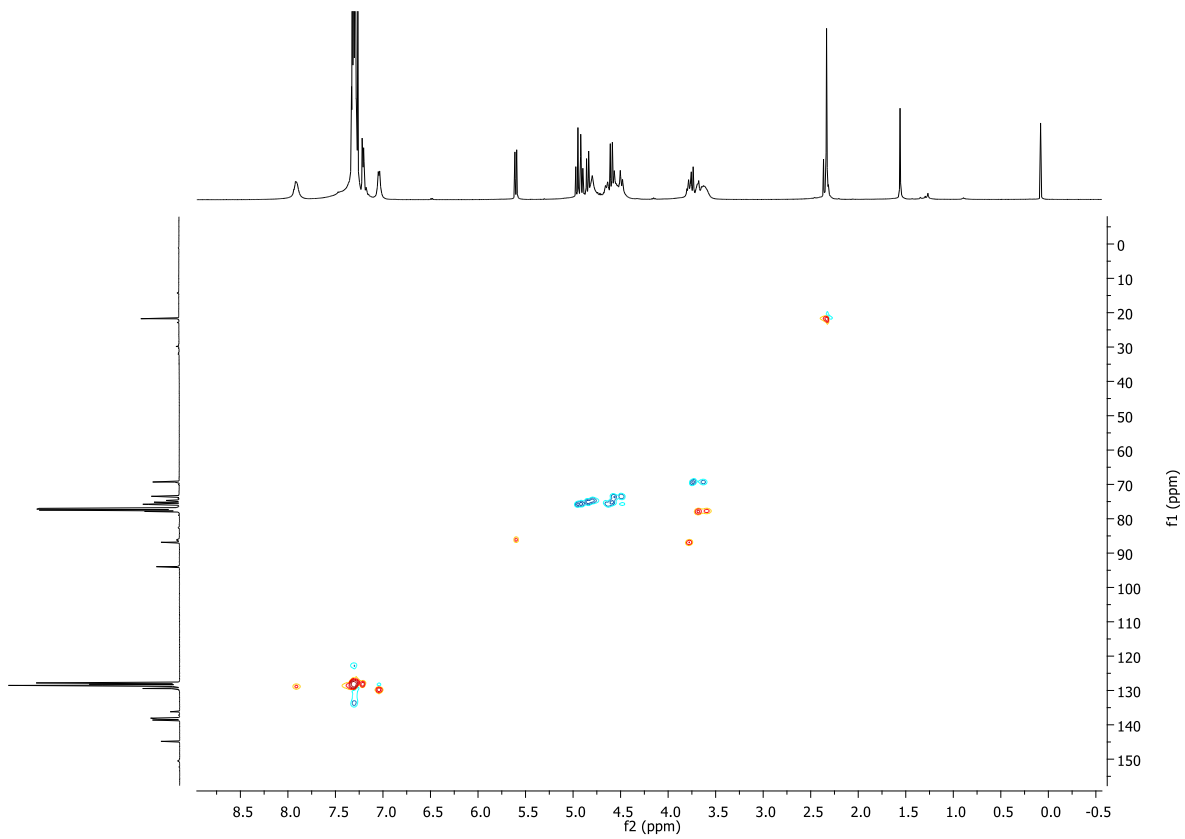

Compound 22

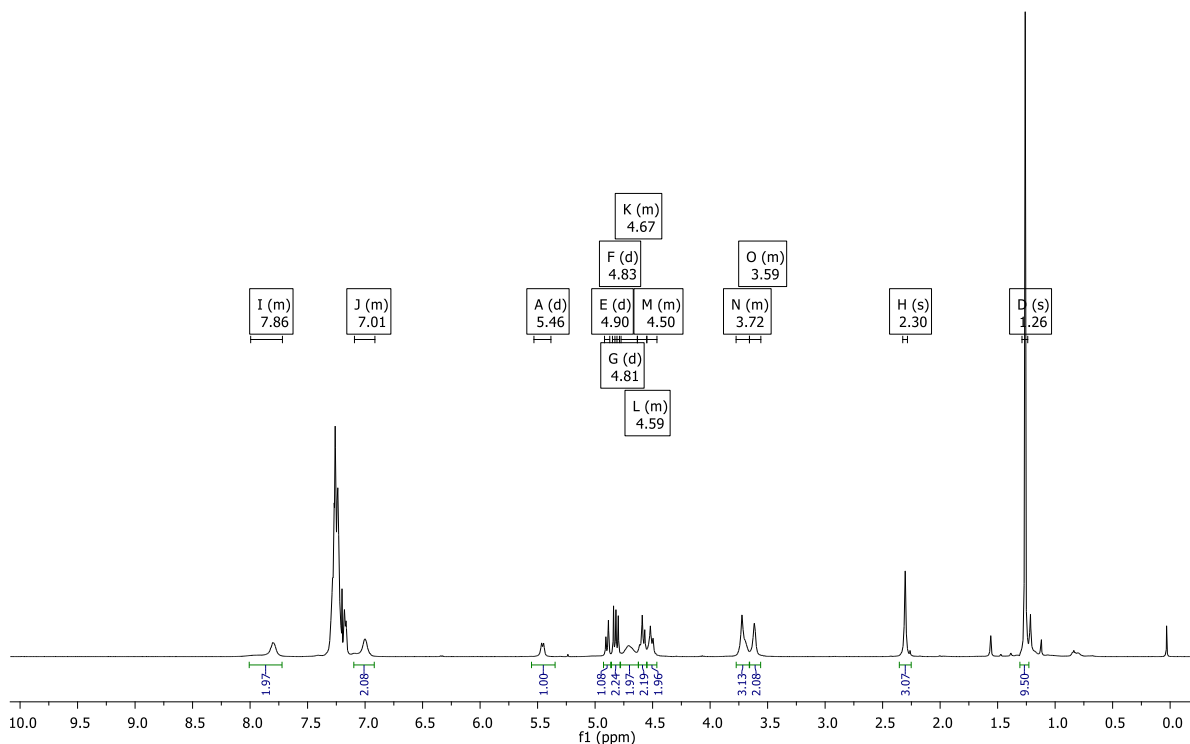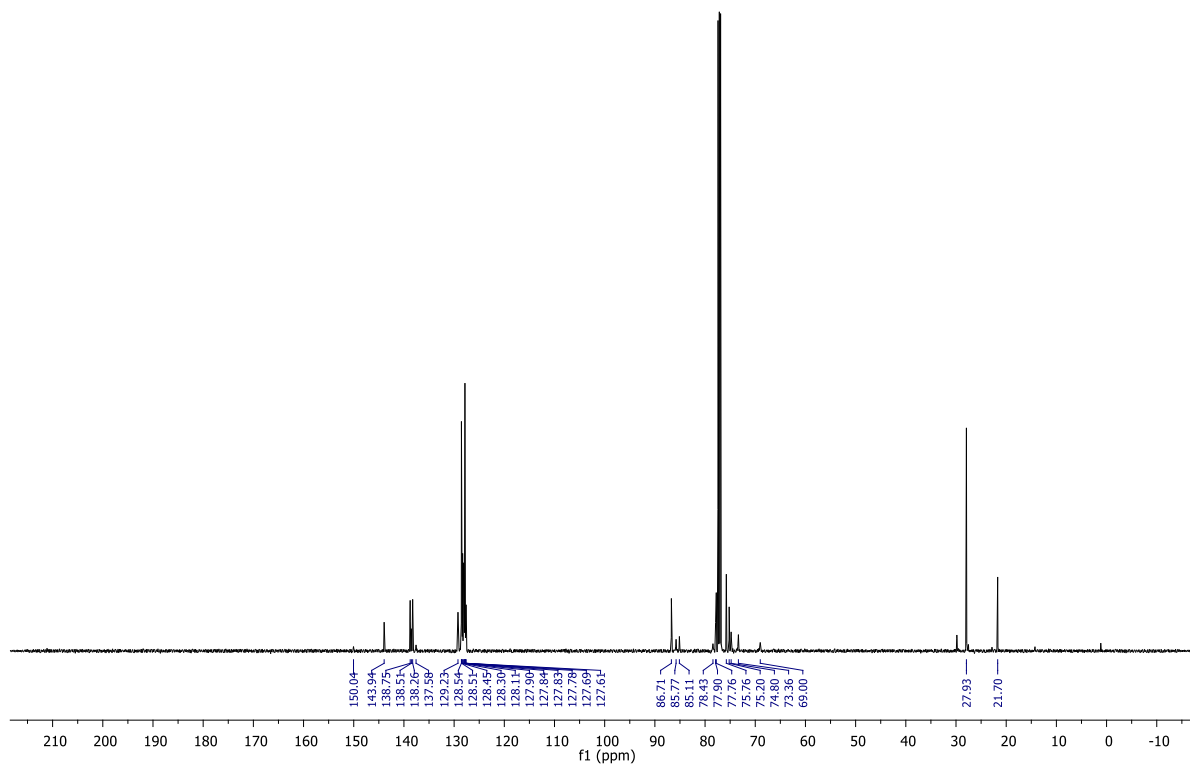

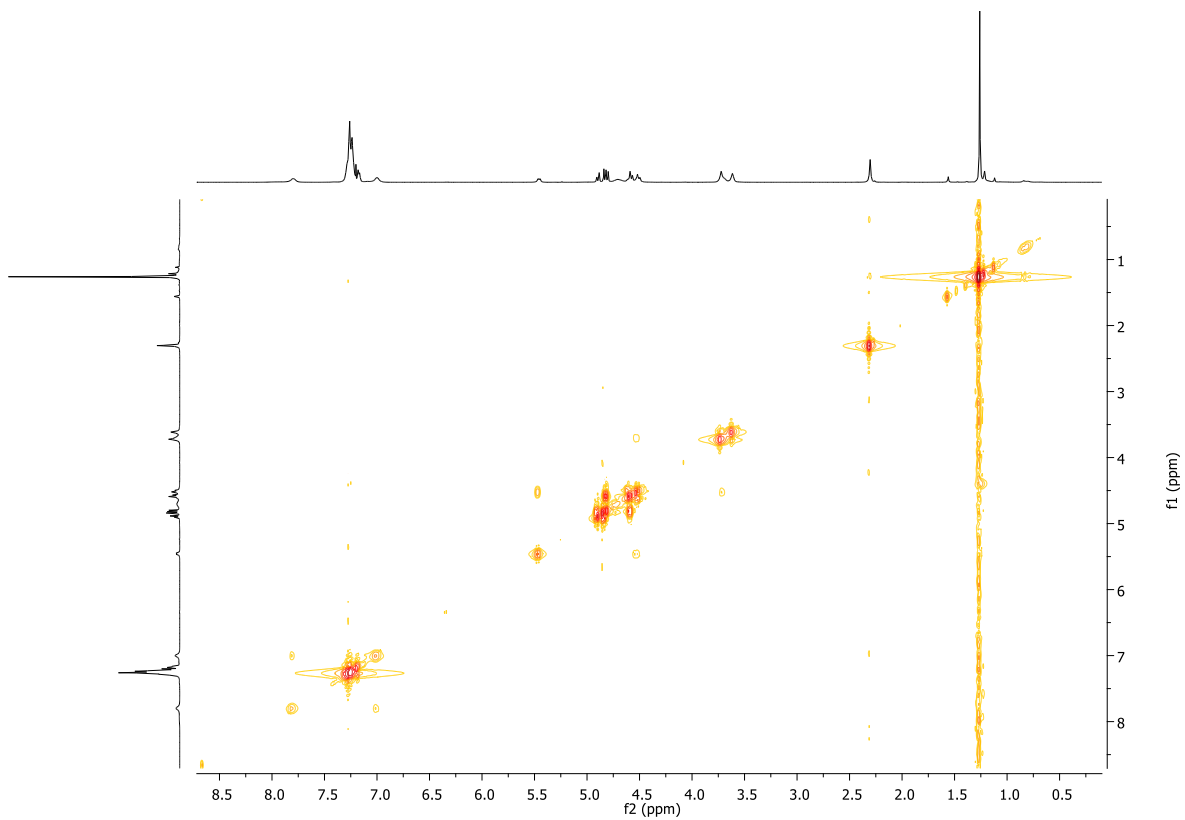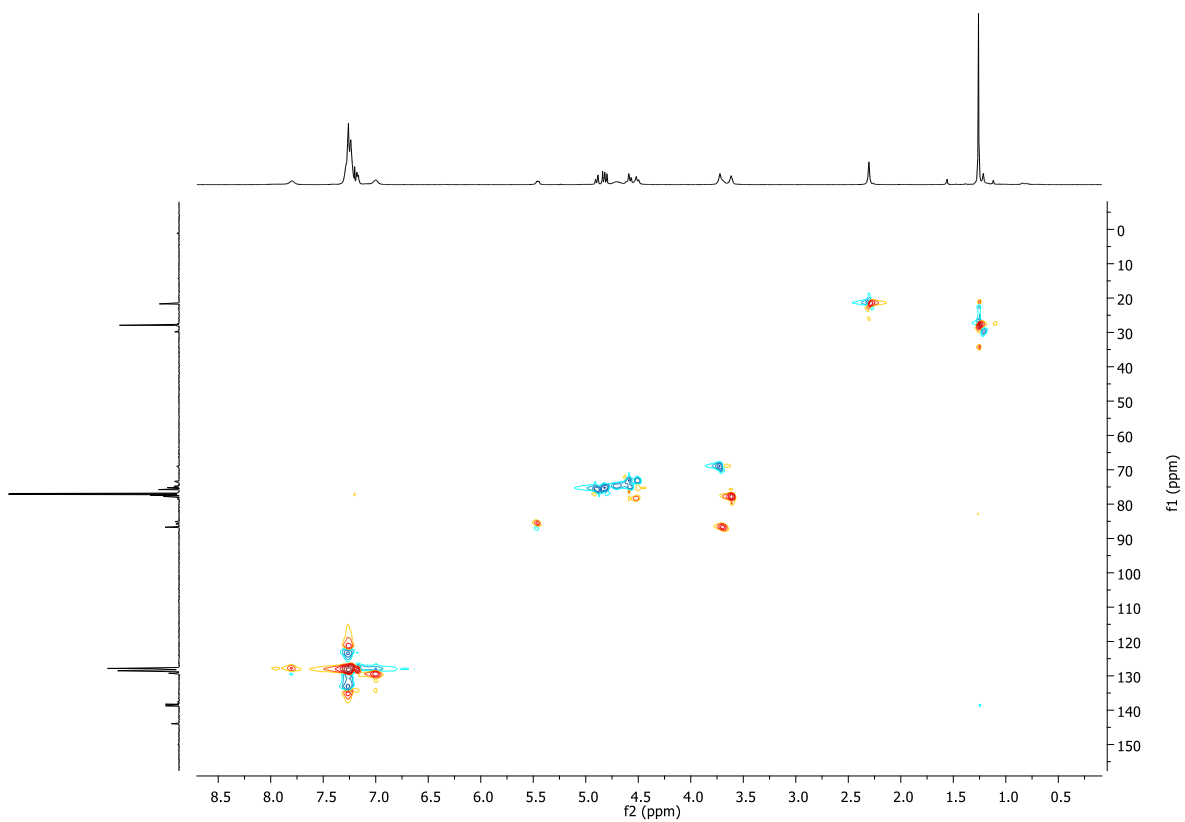

Compound 23

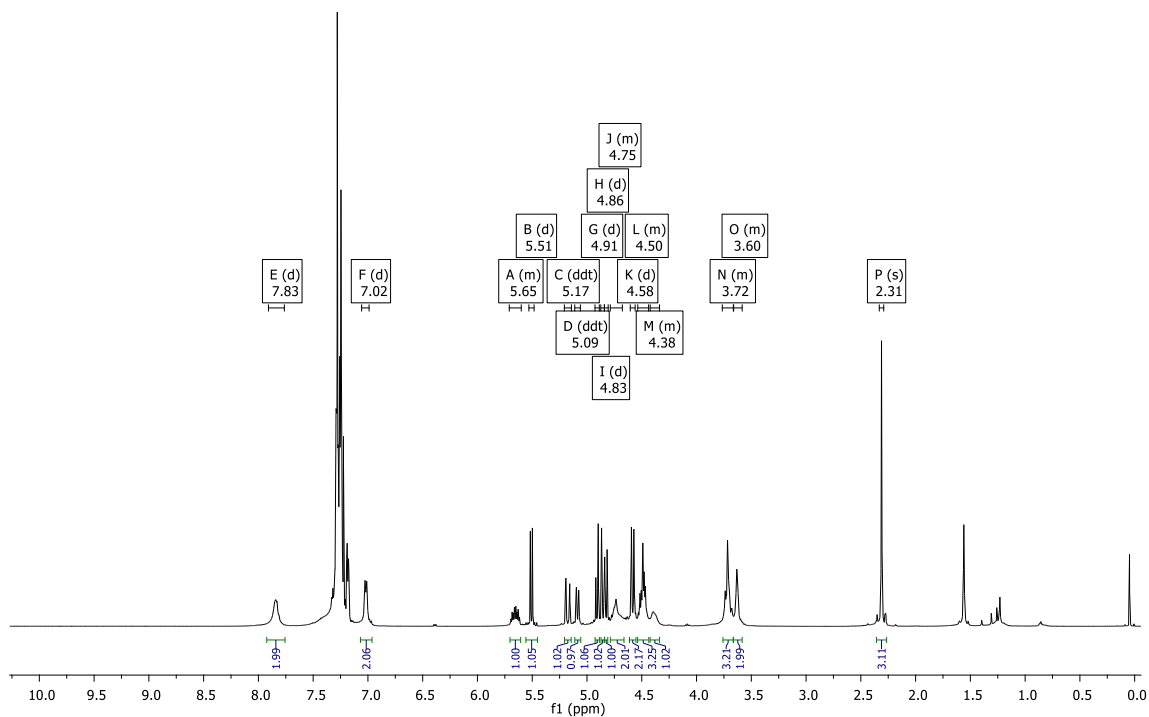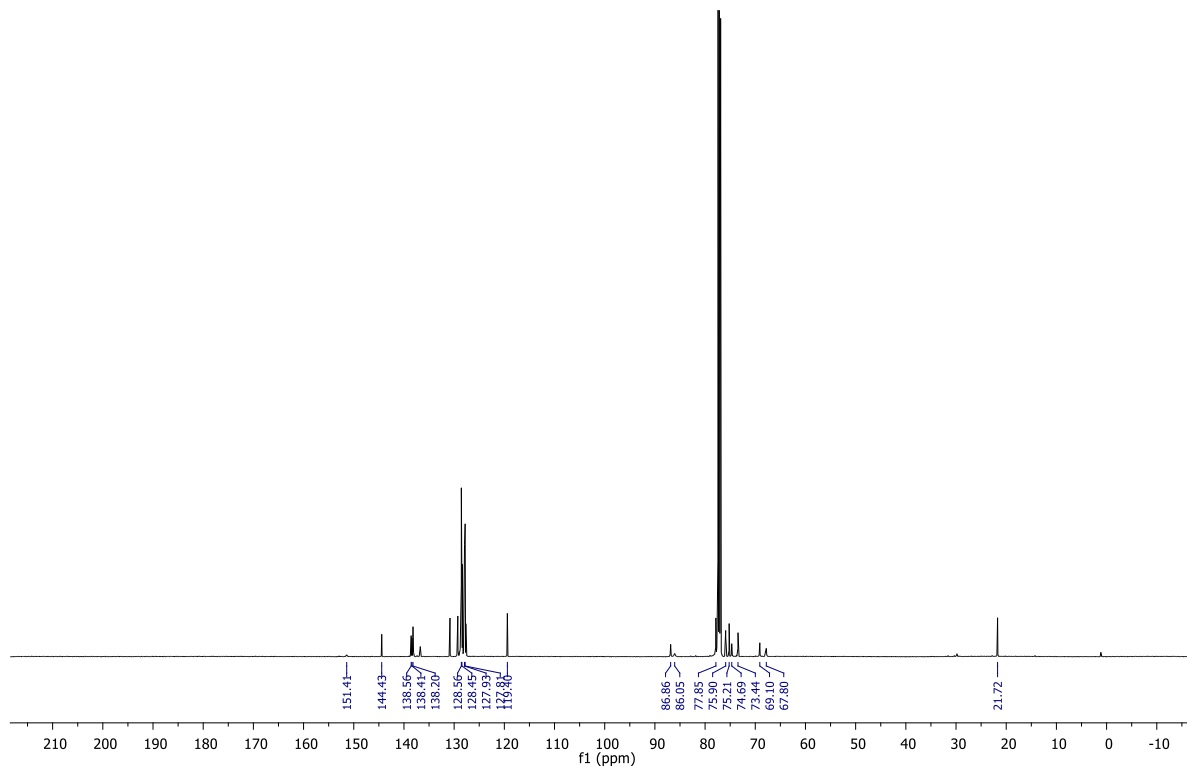

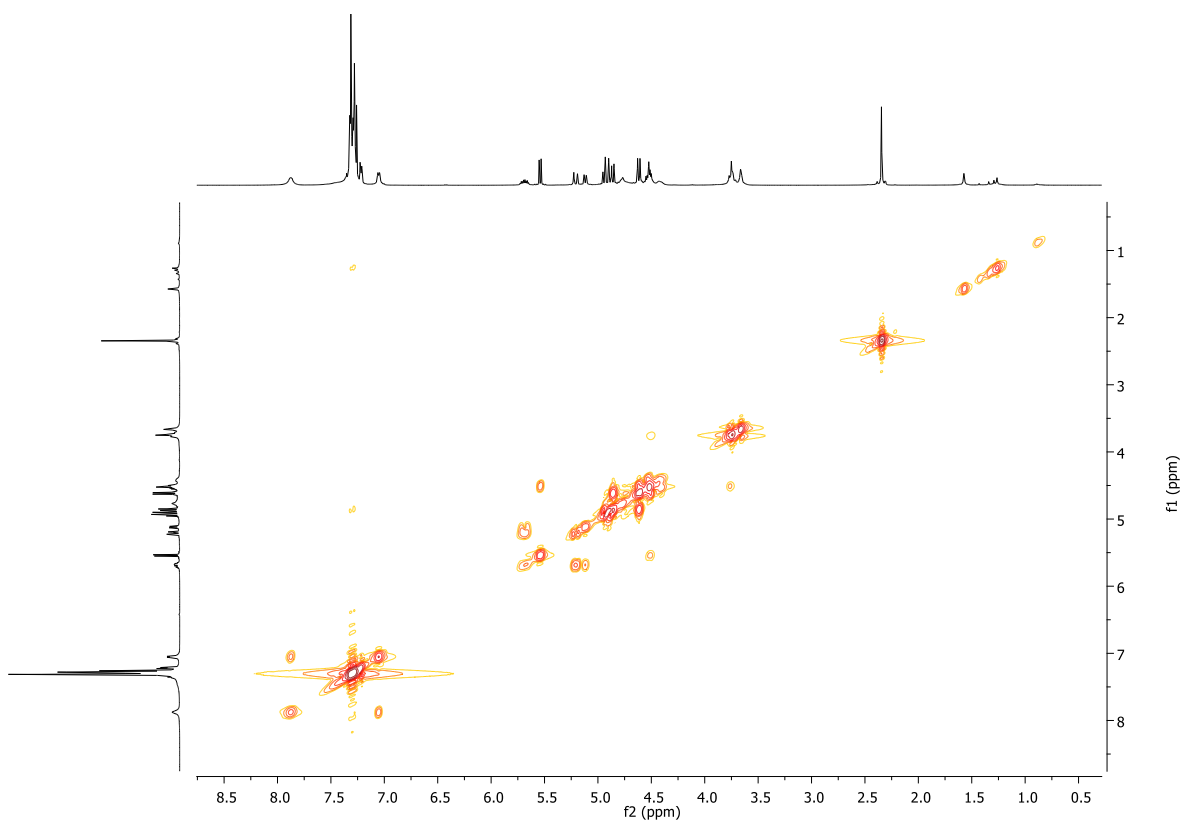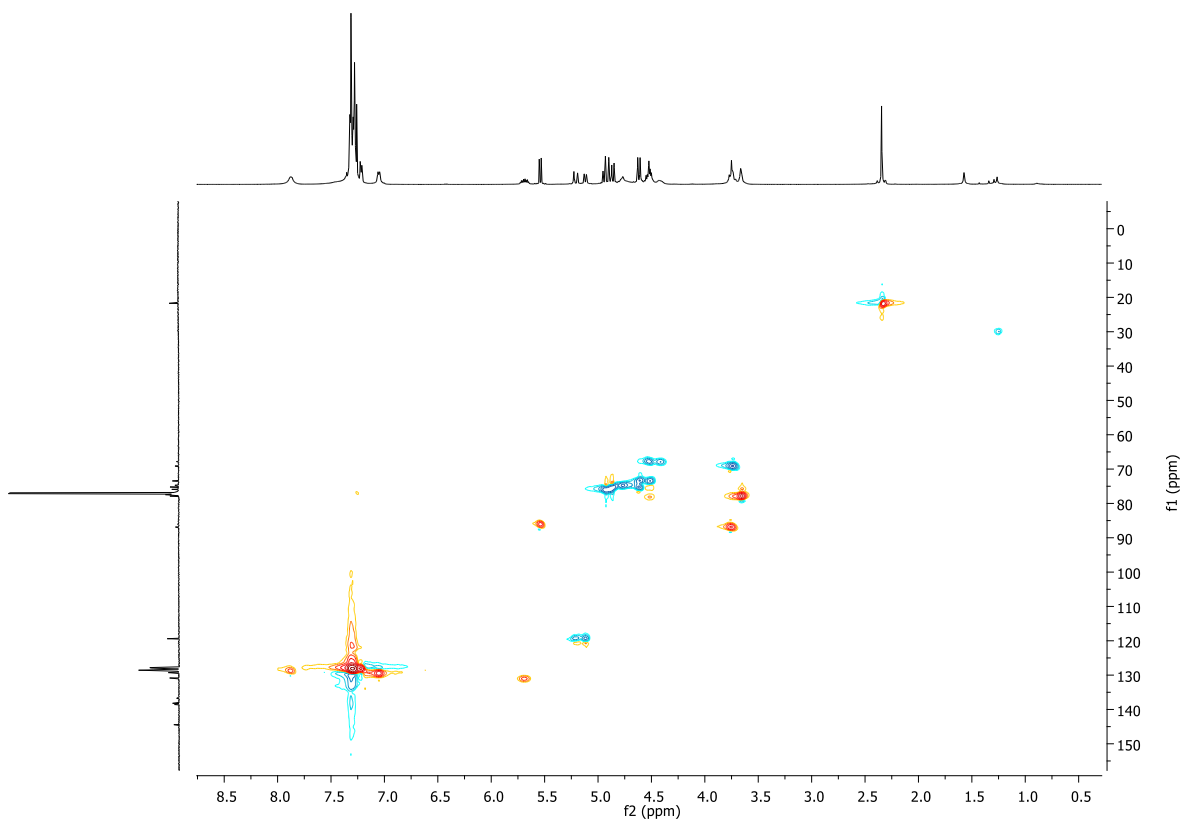

Compound 23 $\alpha/\beta$

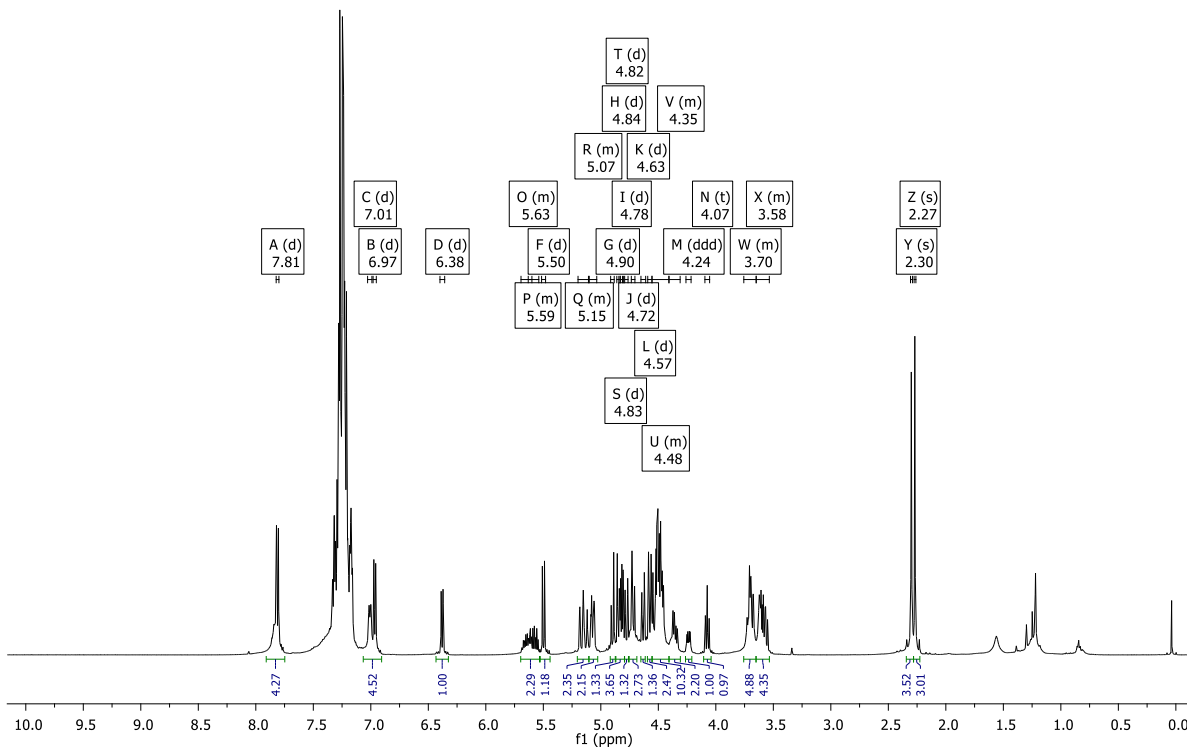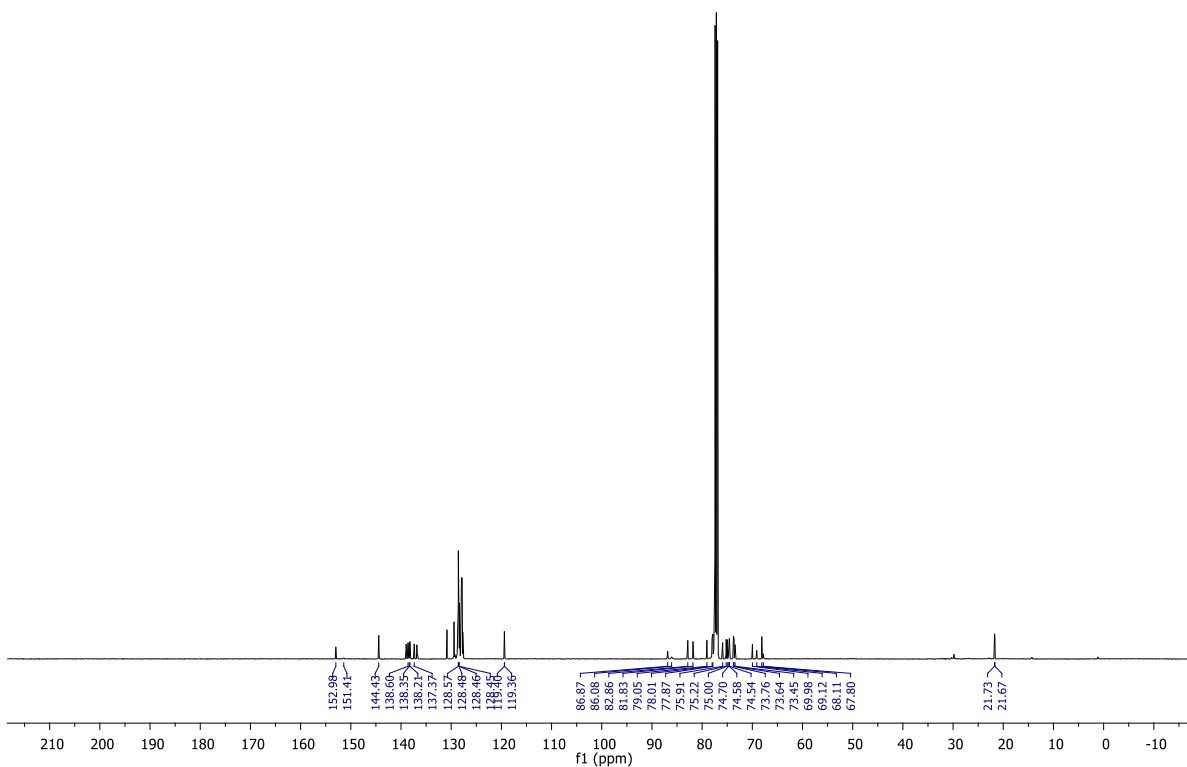



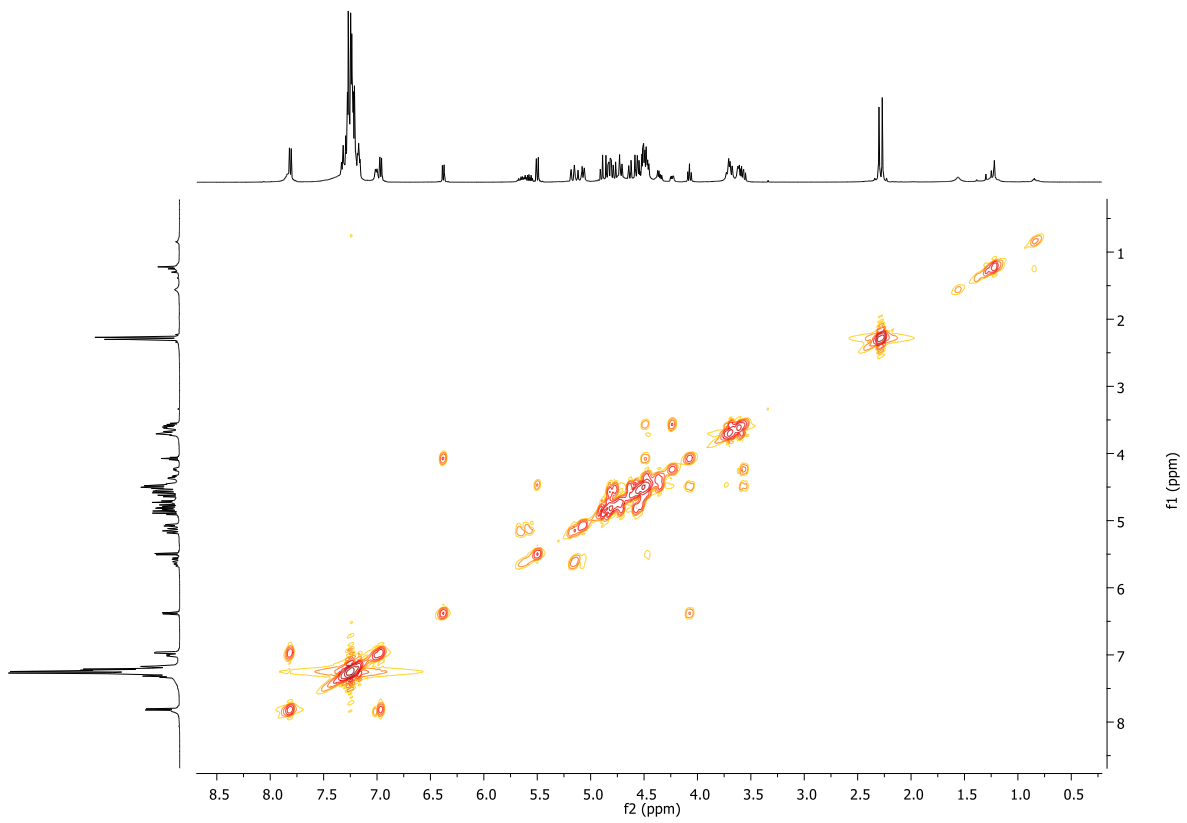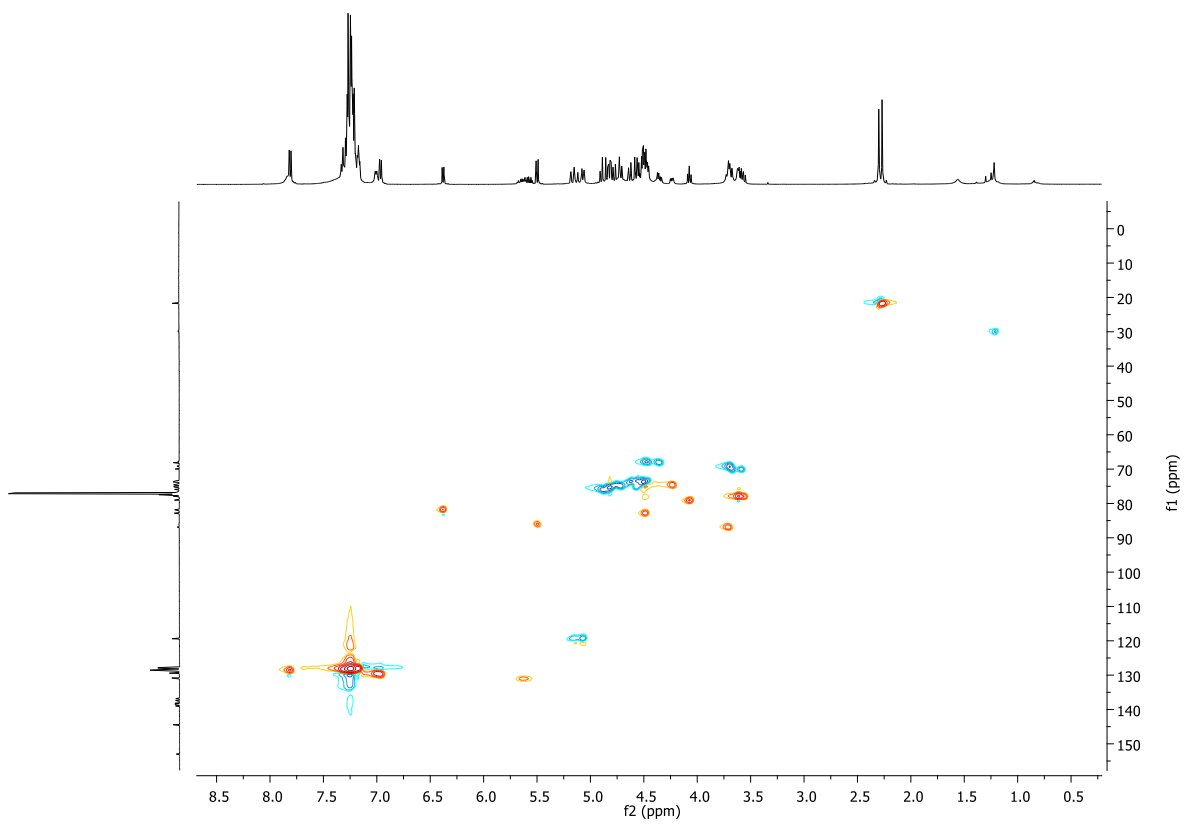

Compound 24

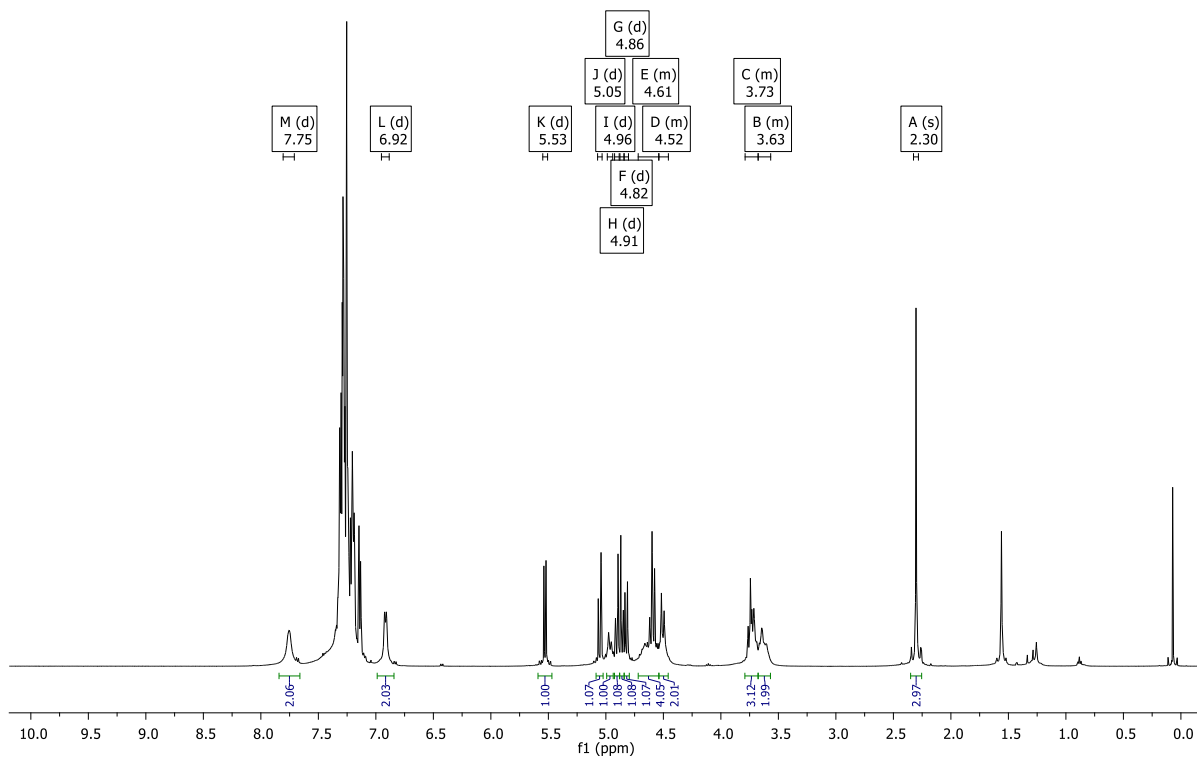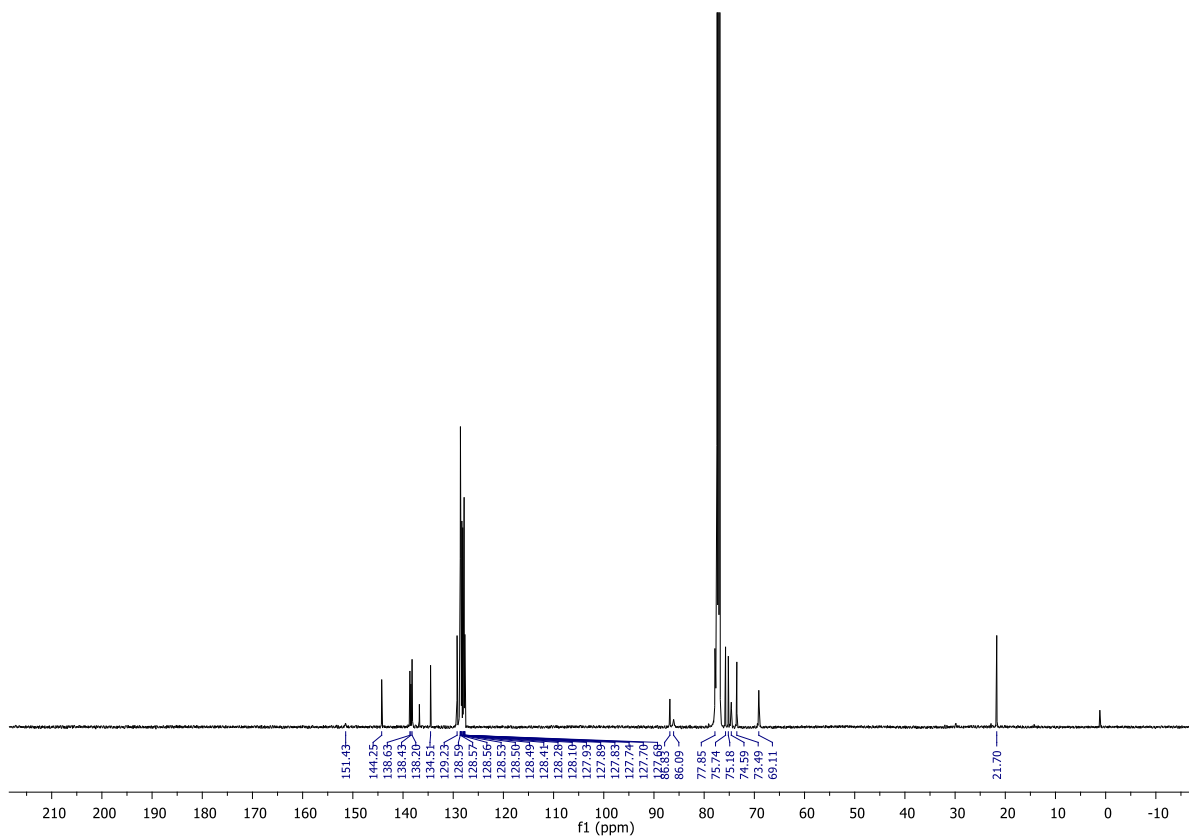

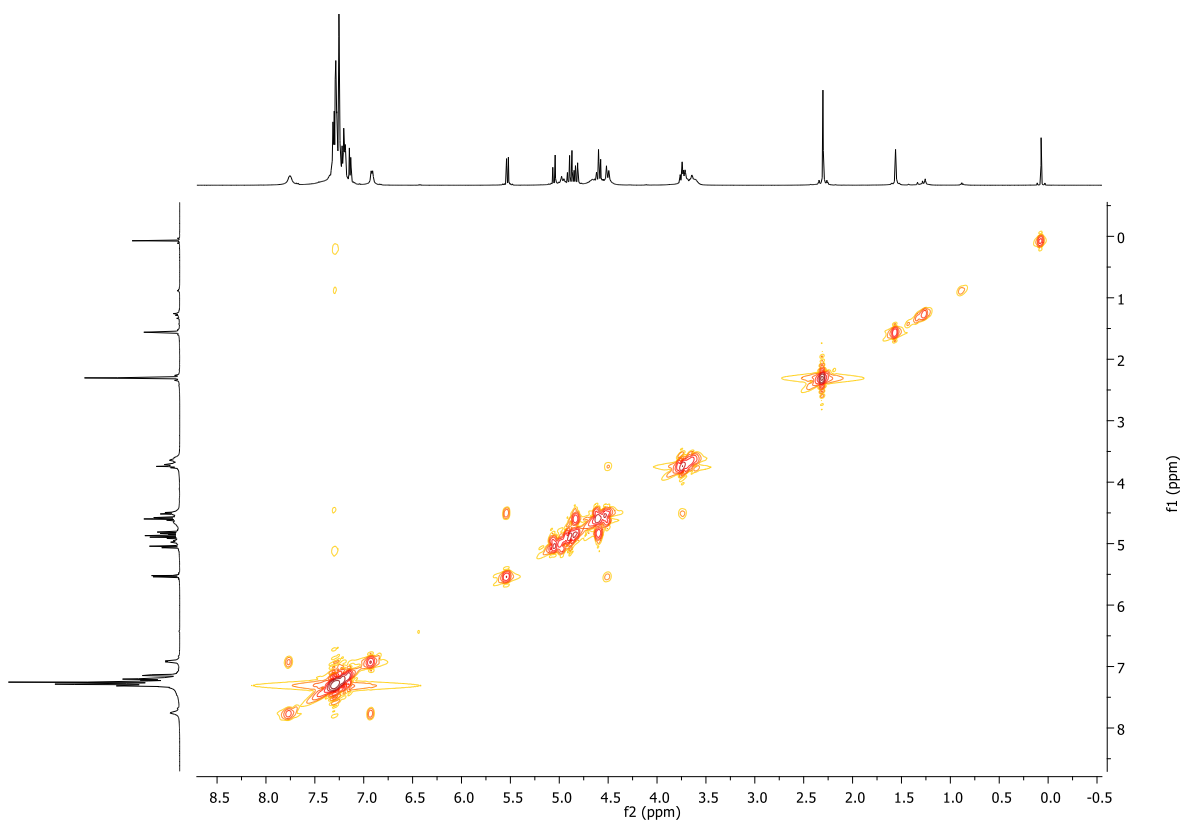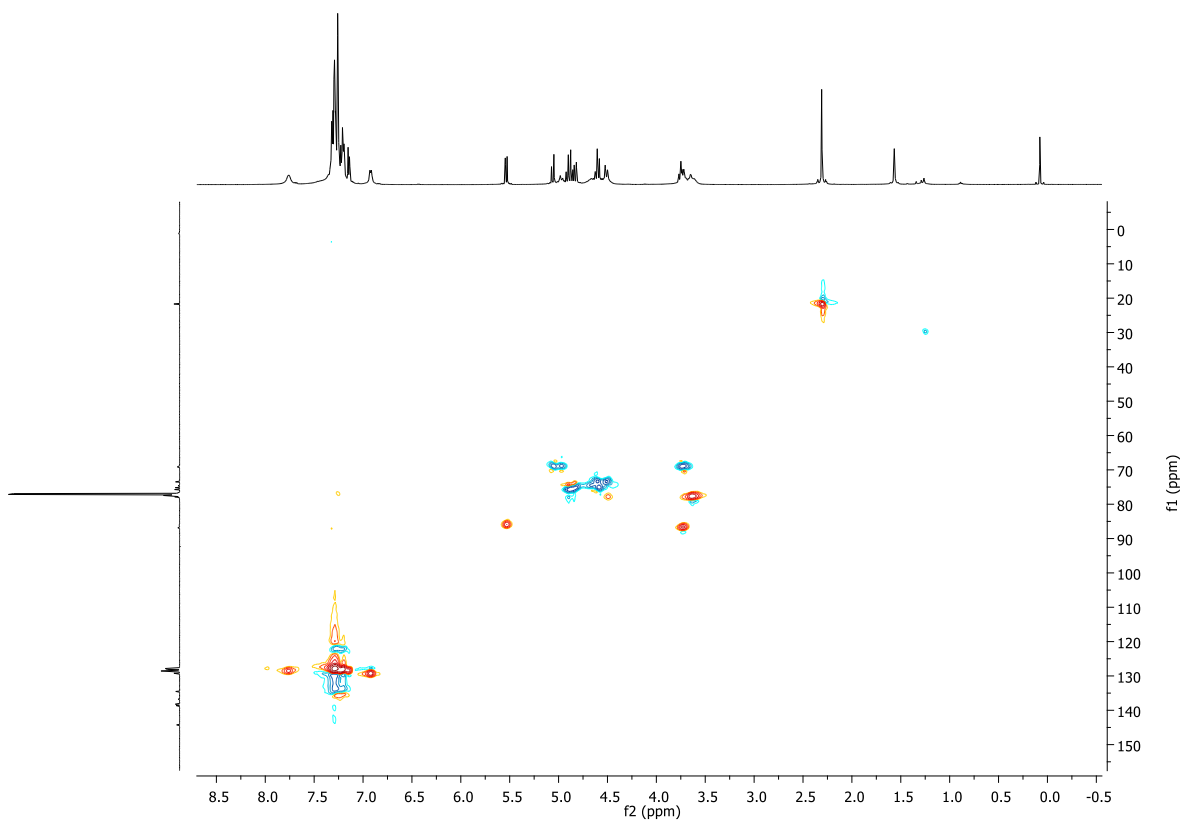

Compound 24 $\alpha$ / $\beta$

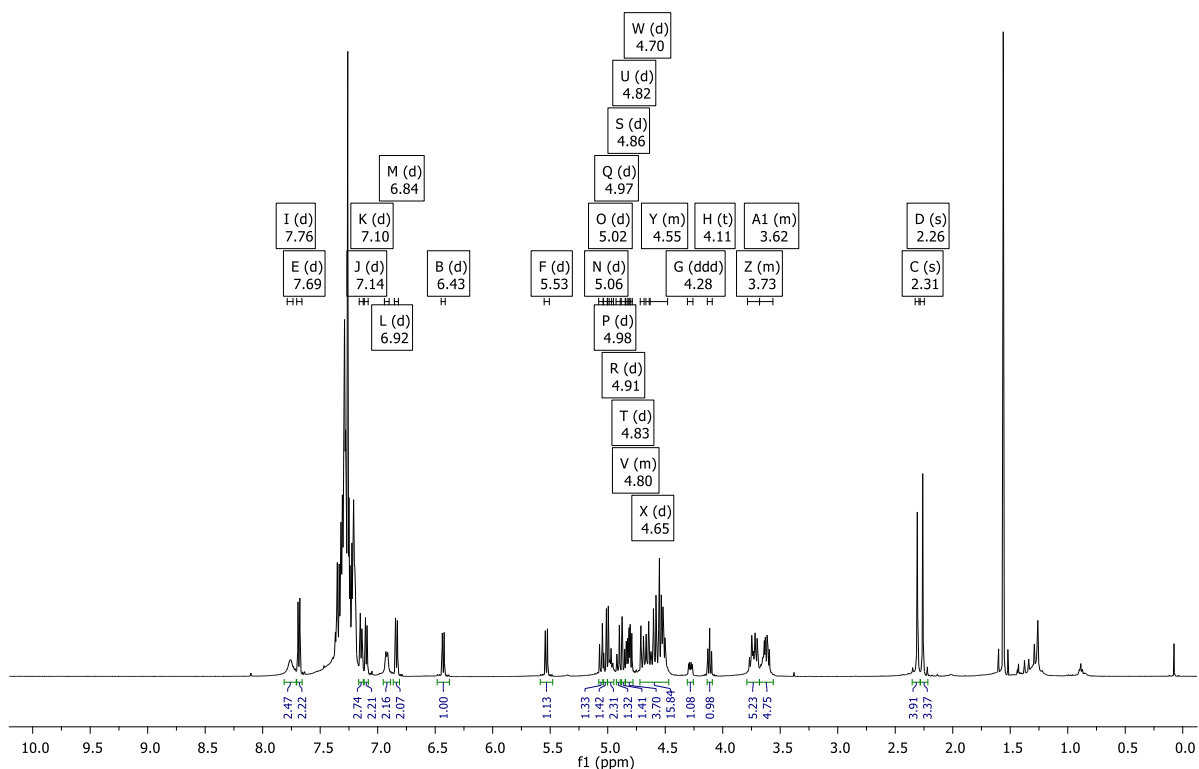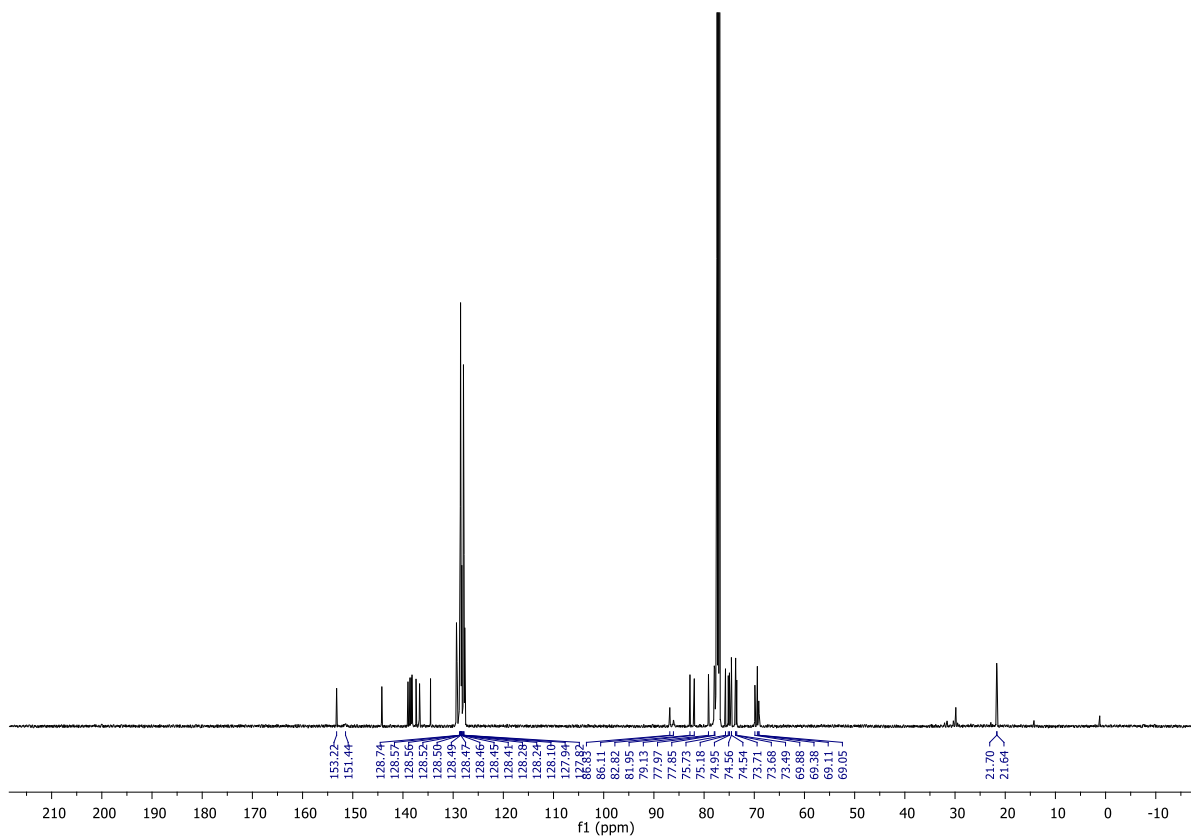

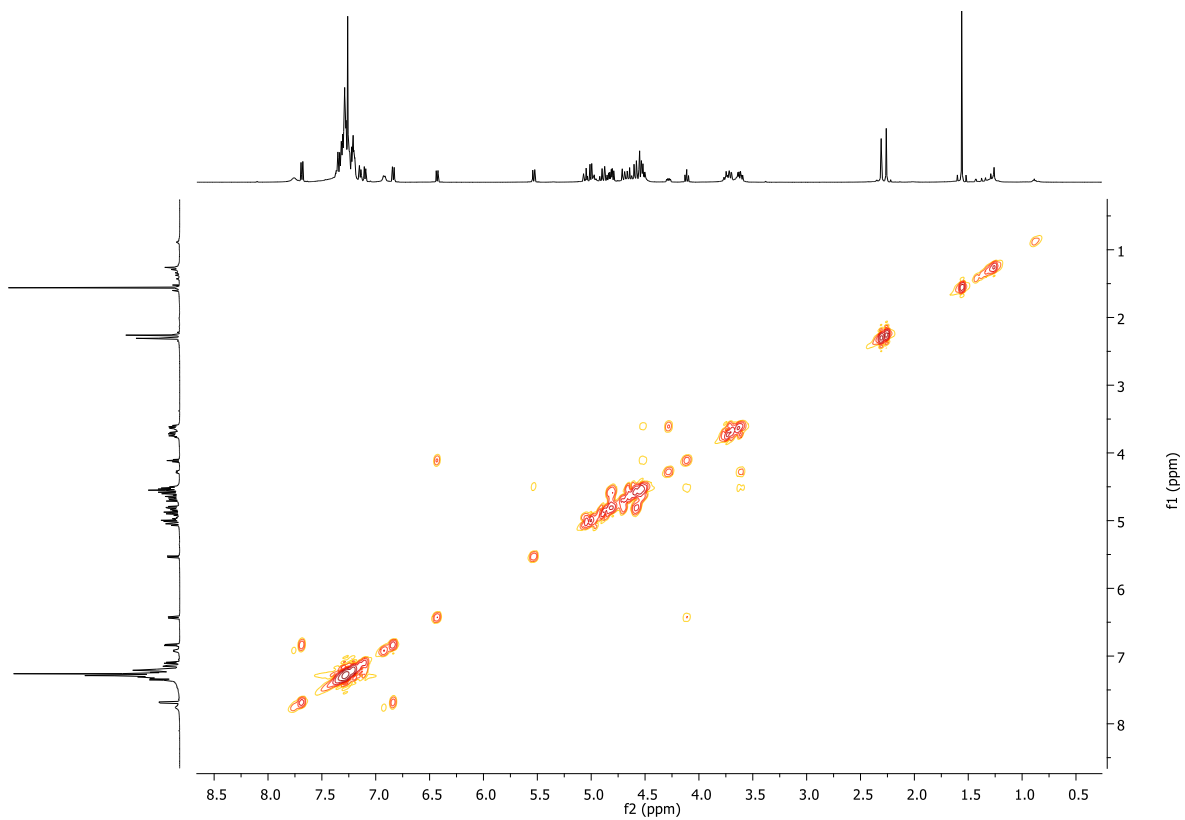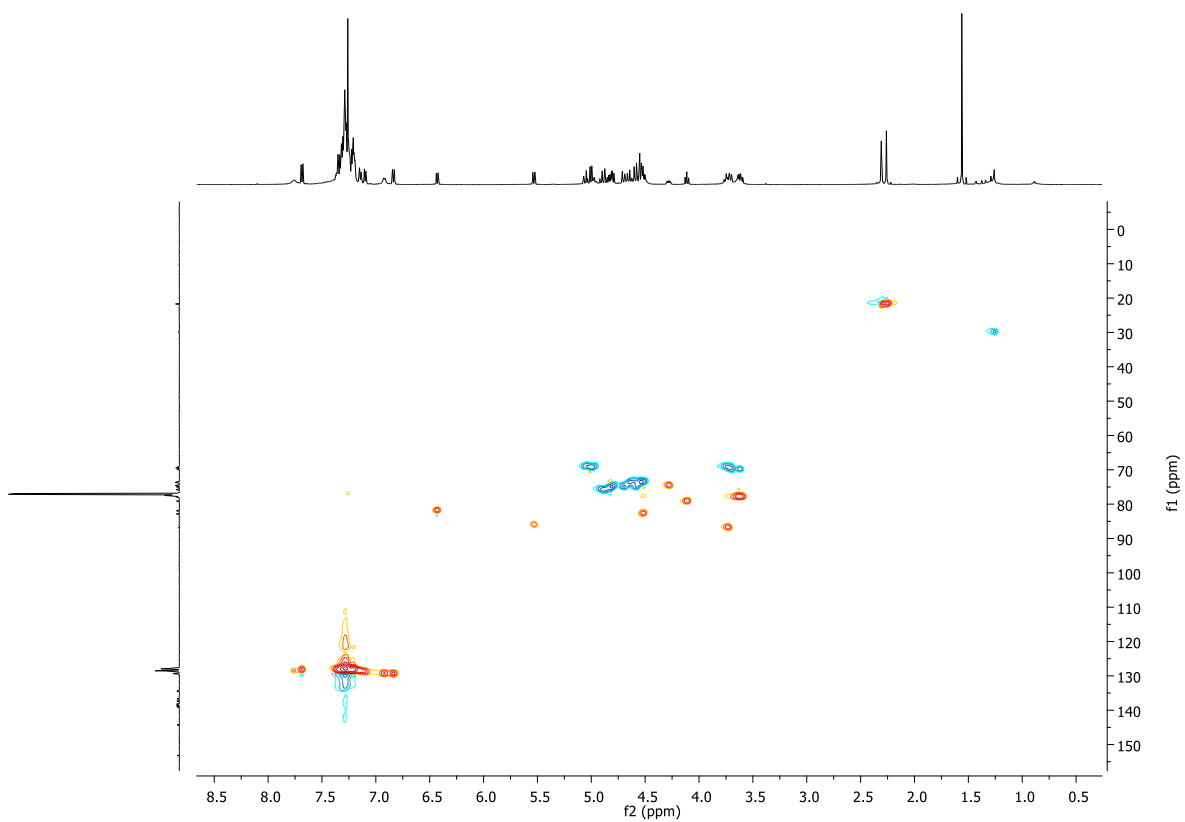

Compound 25

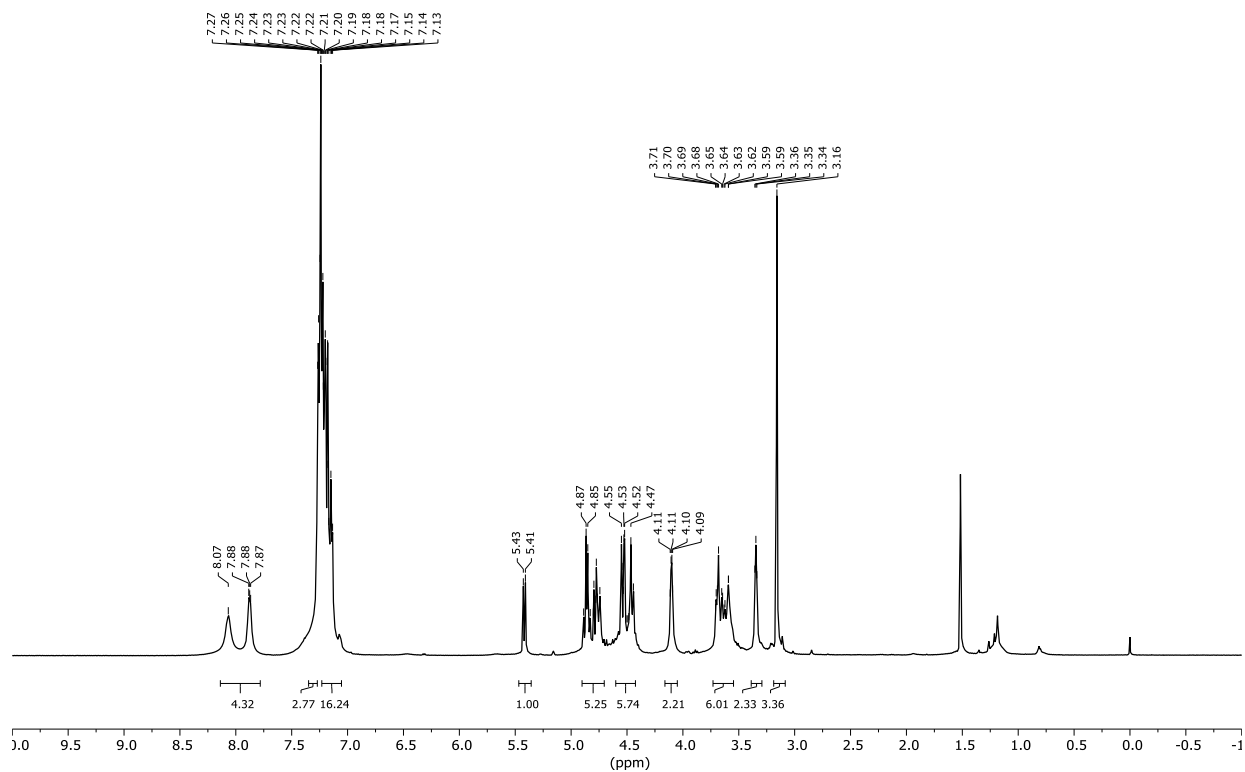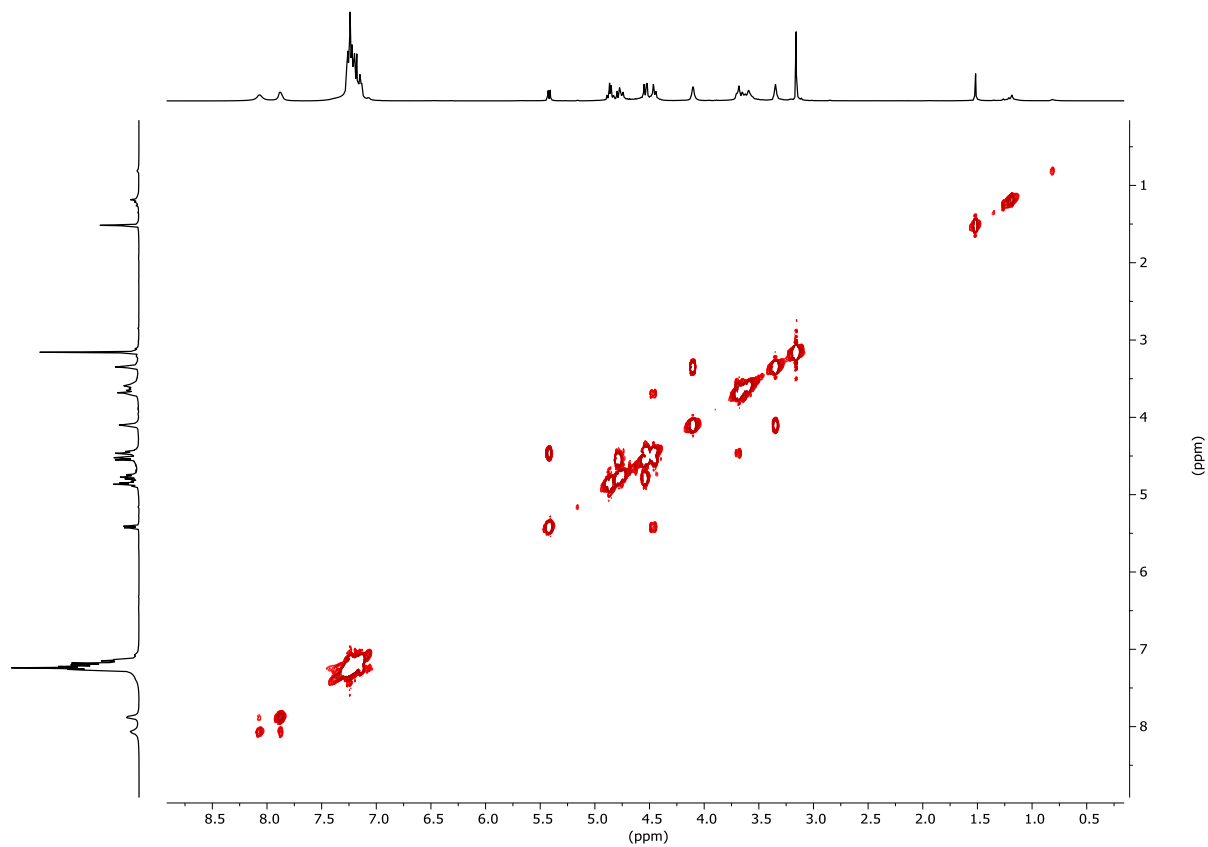

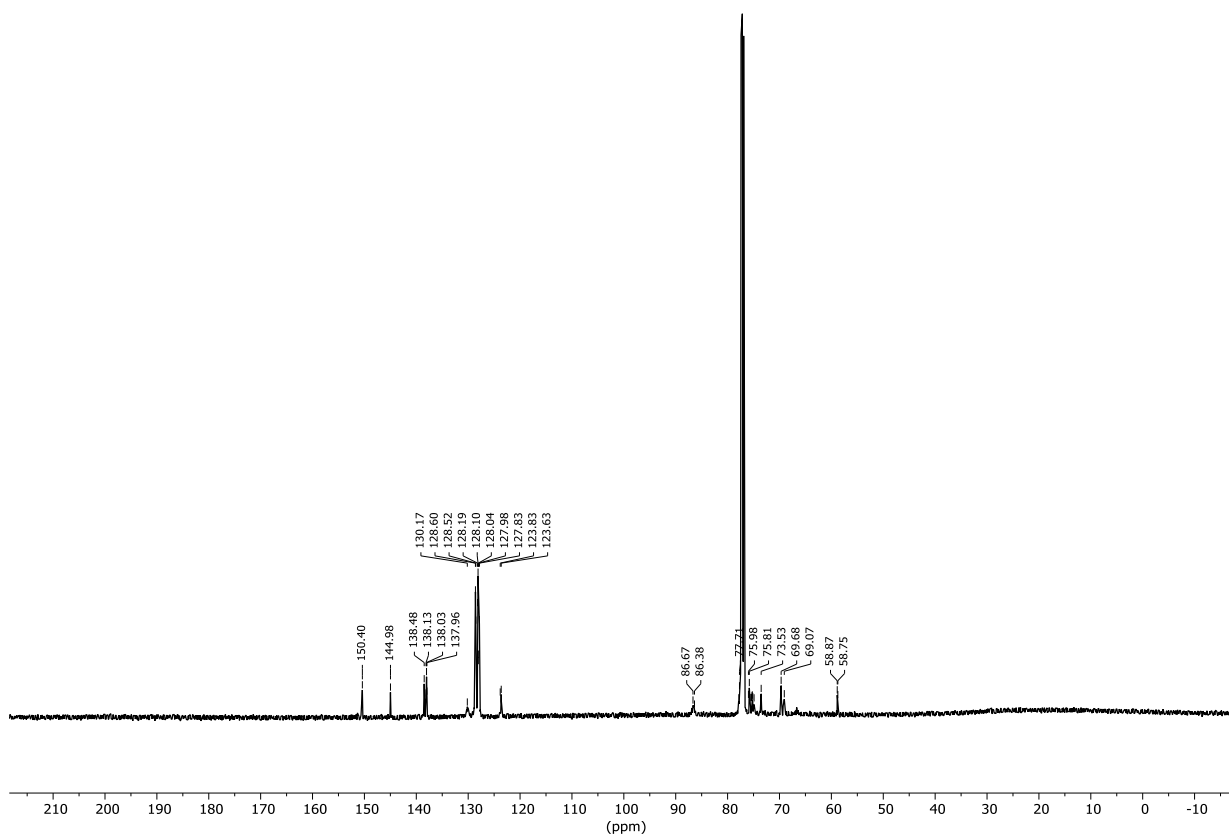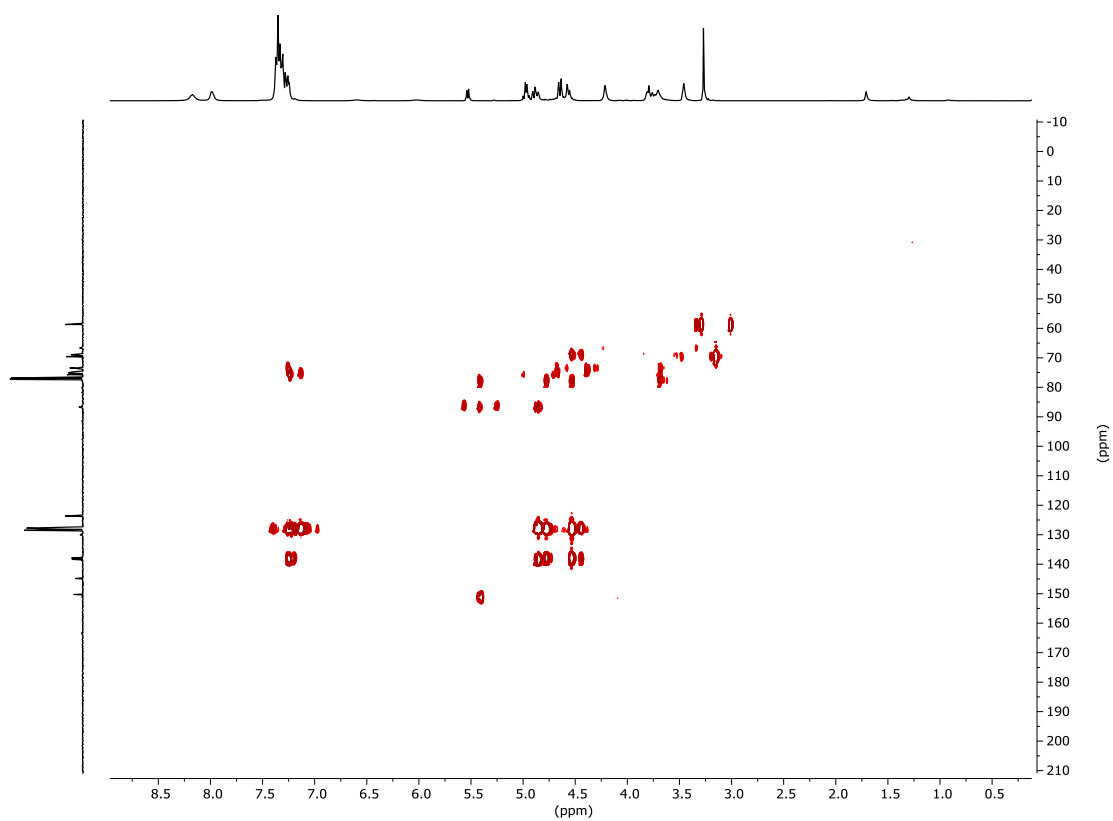

Compound 25 $\alpha$ / $\beta$

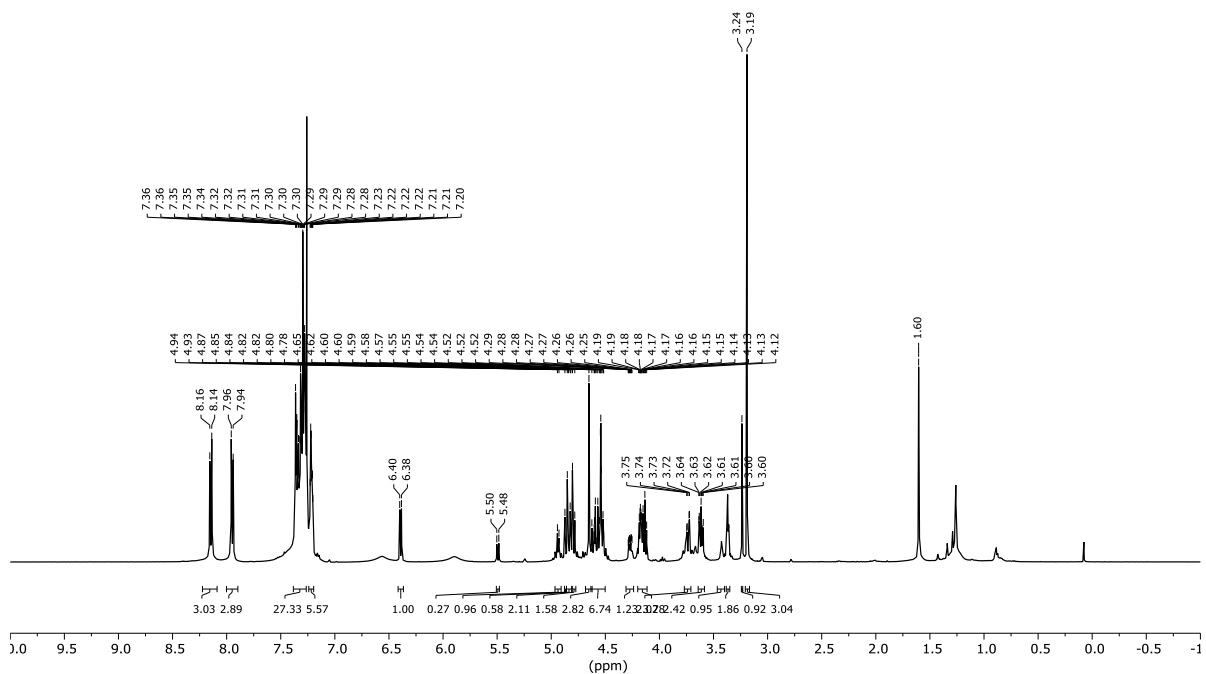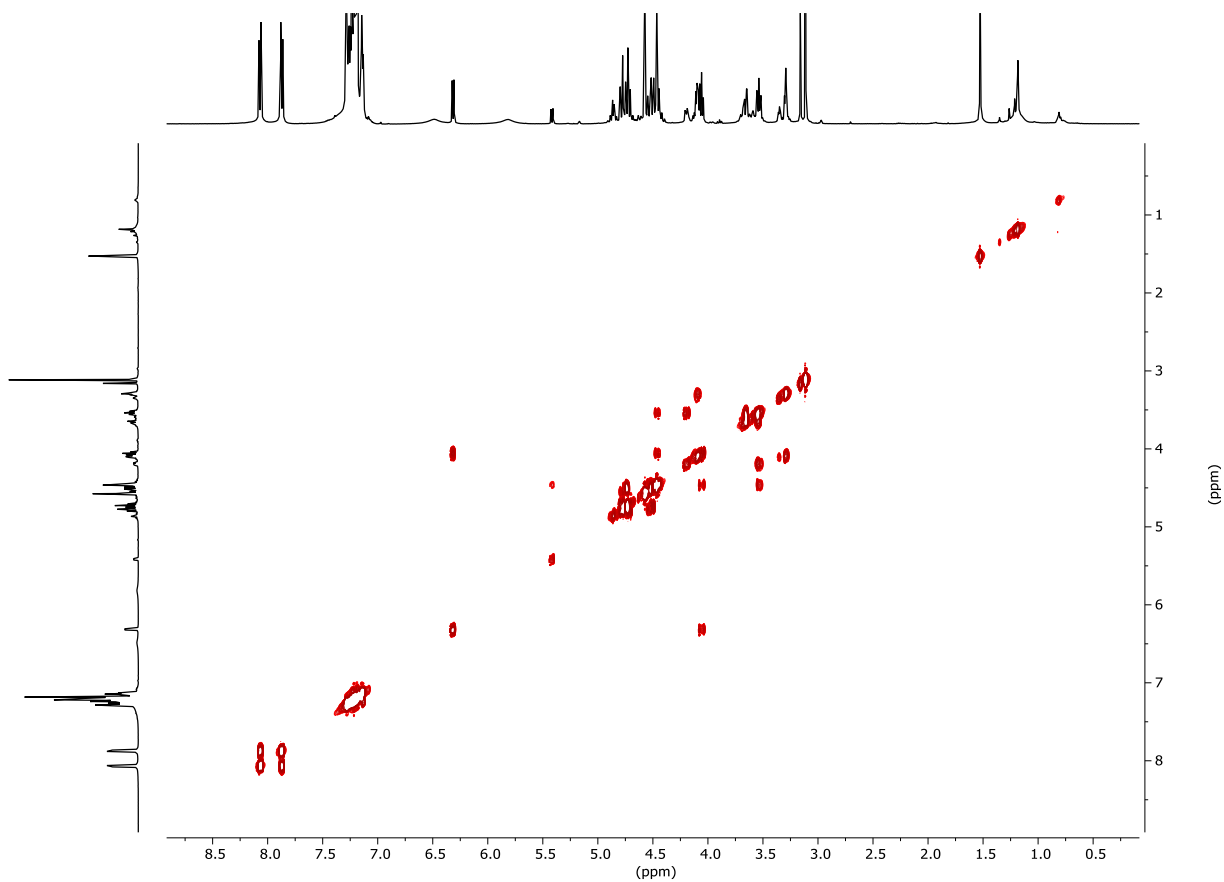



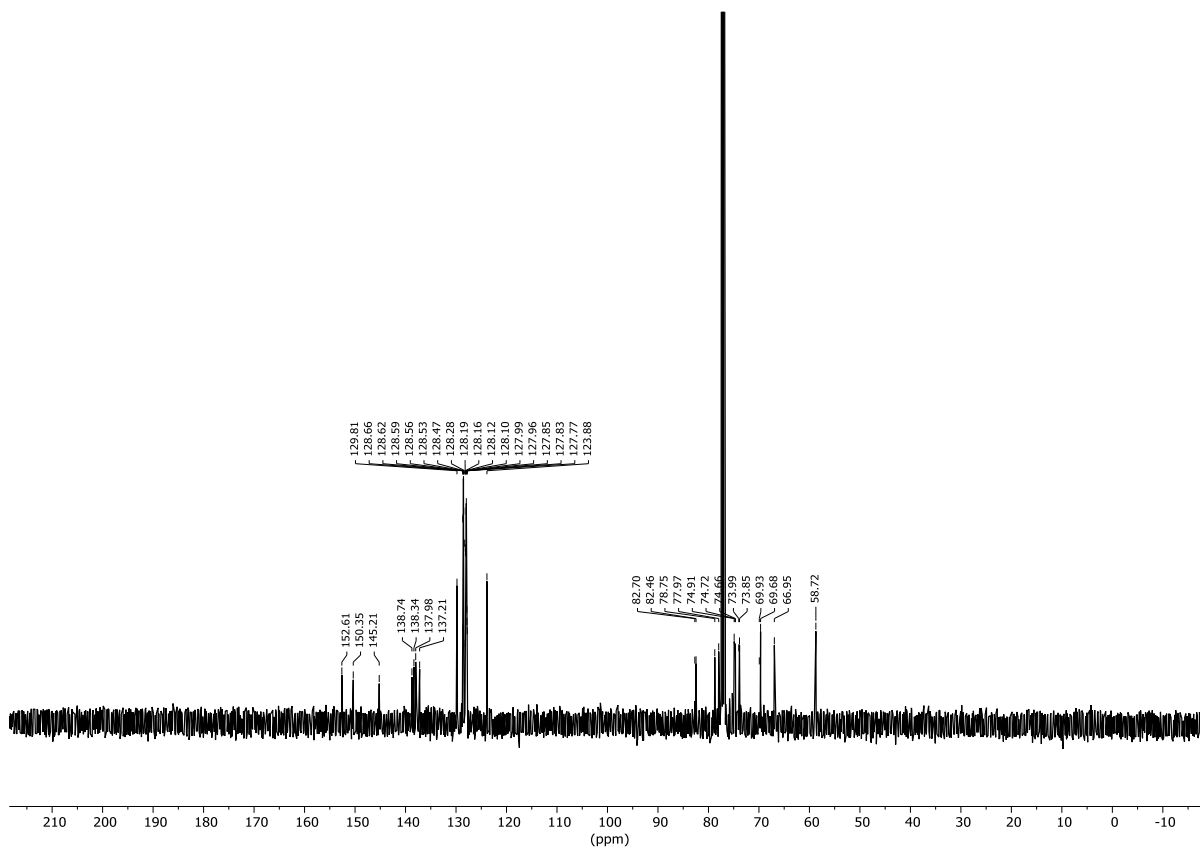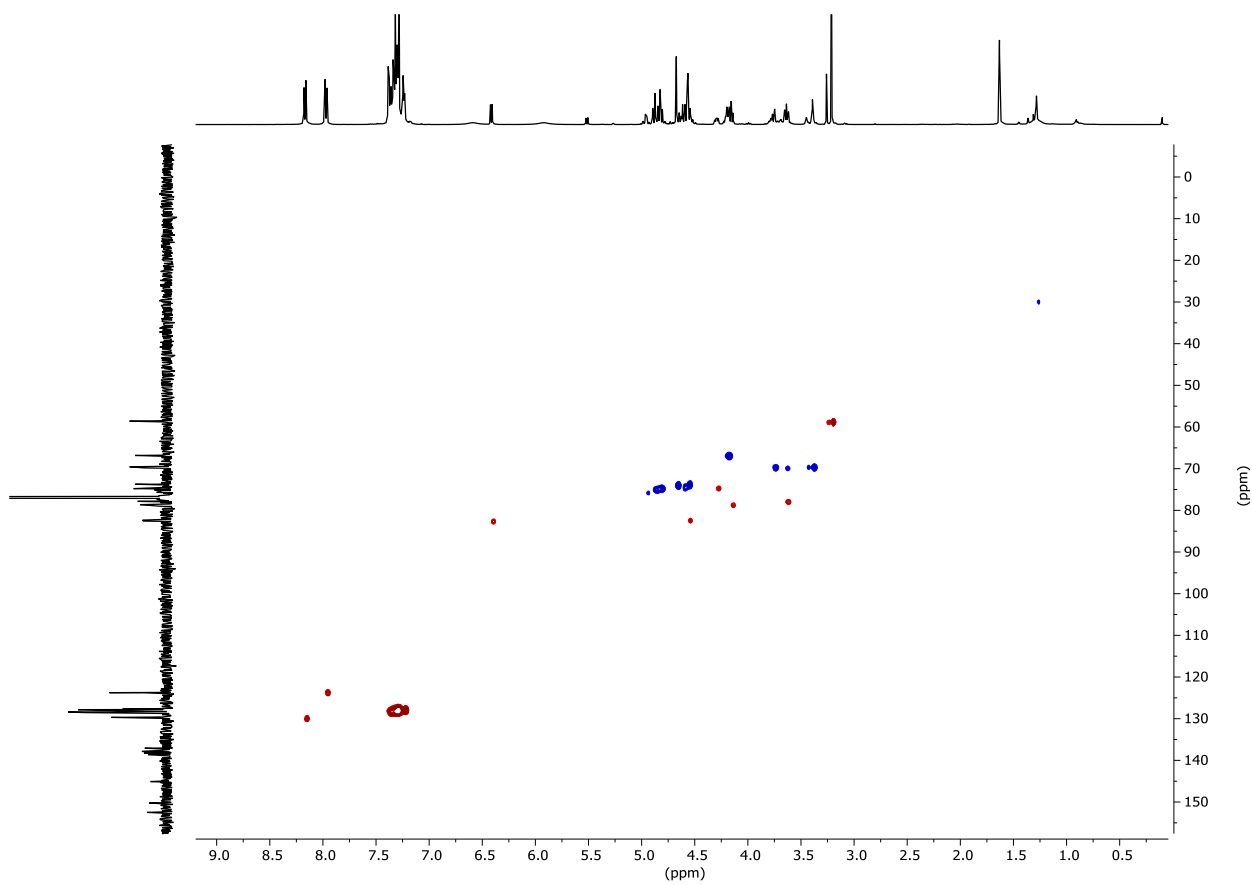



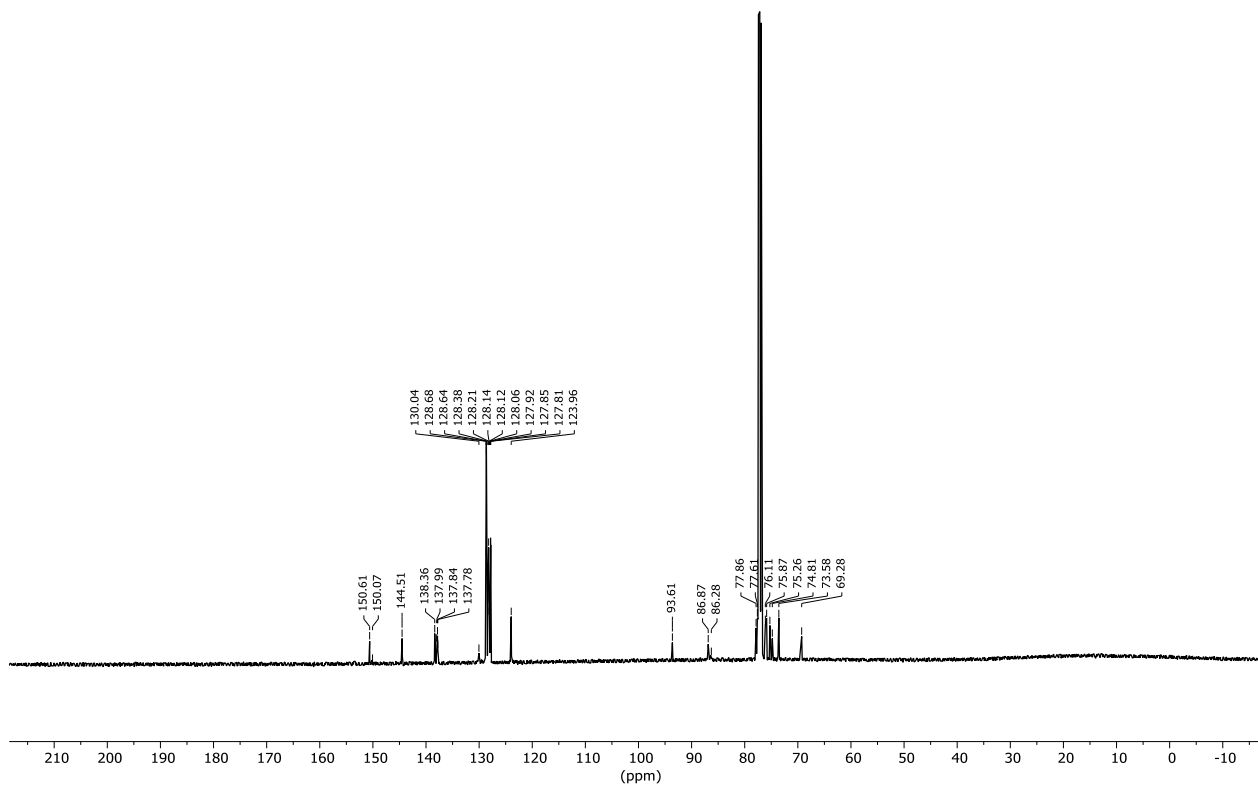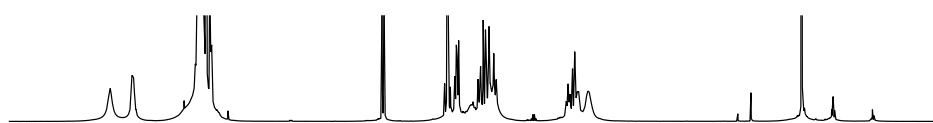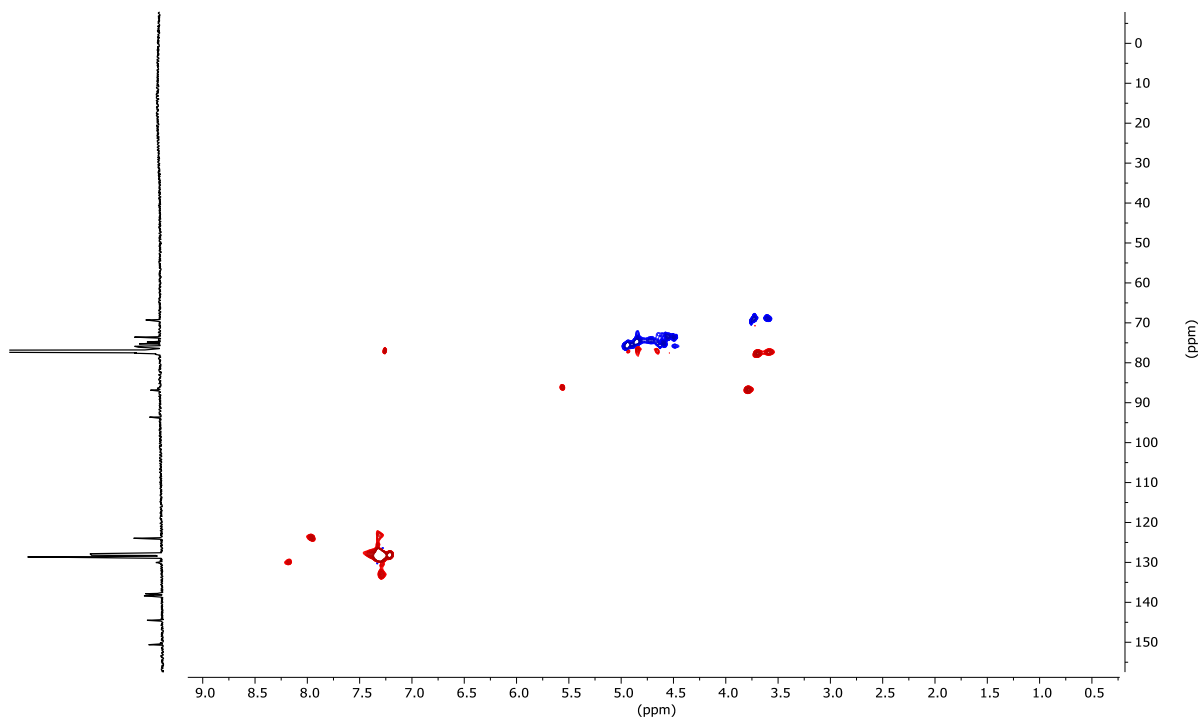

Compound 26 $\alpha$ / $\beta$

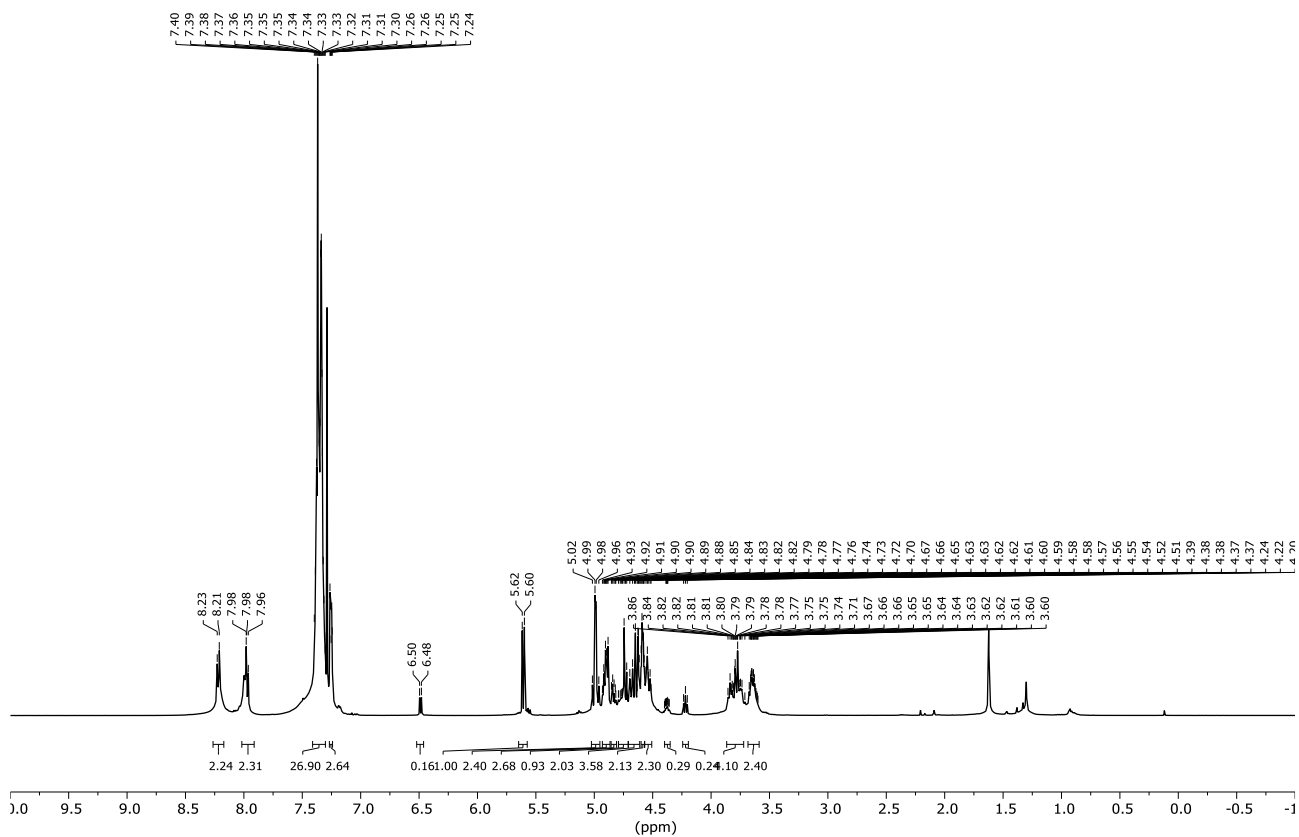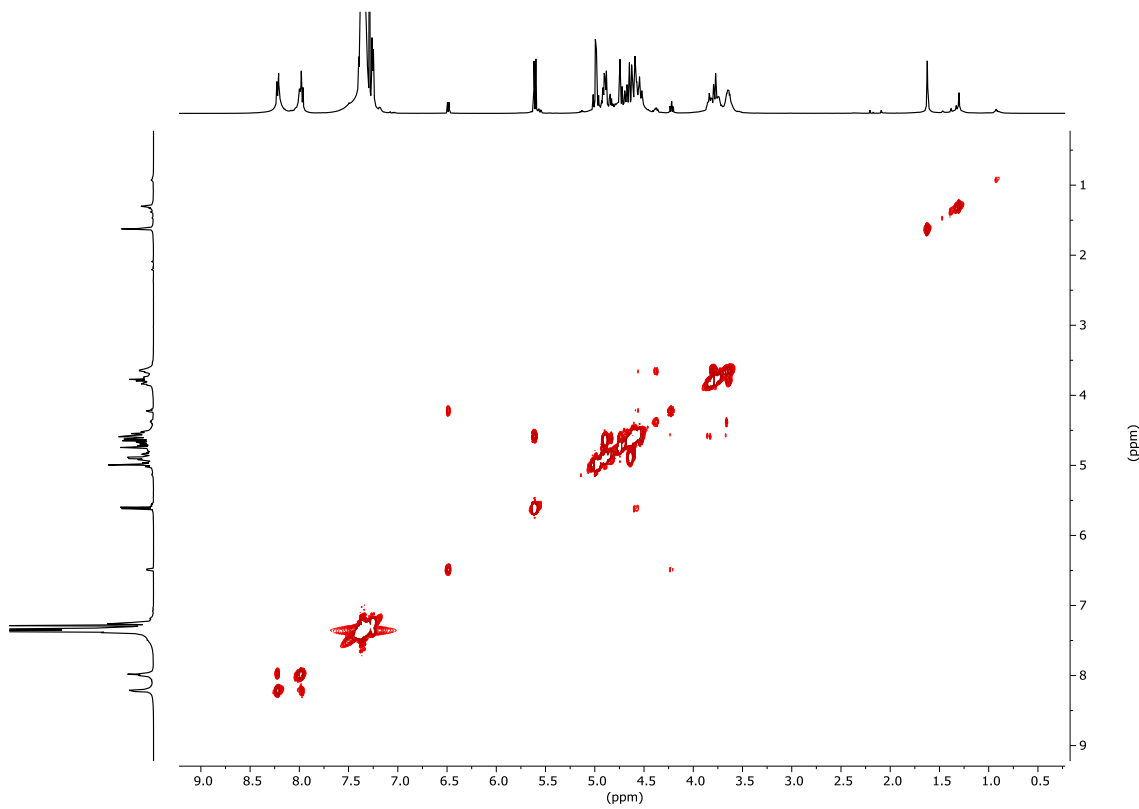

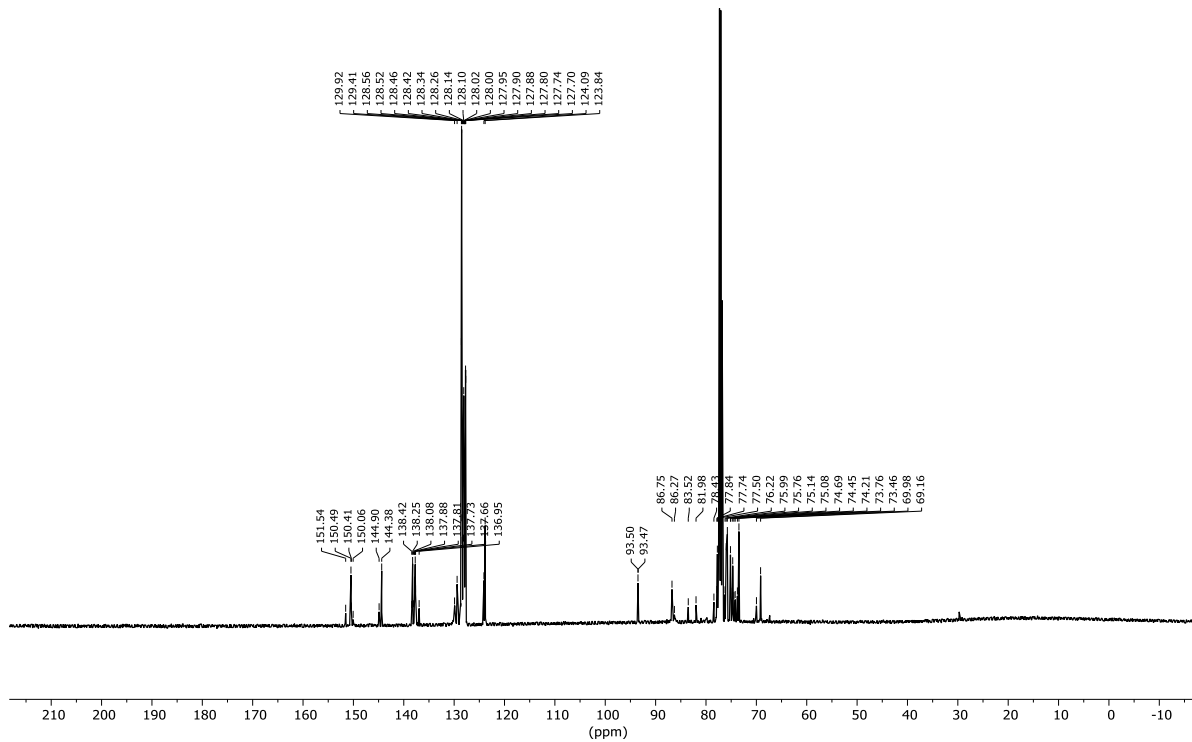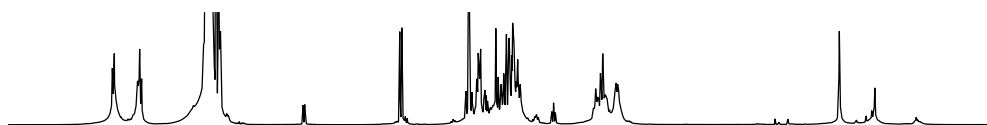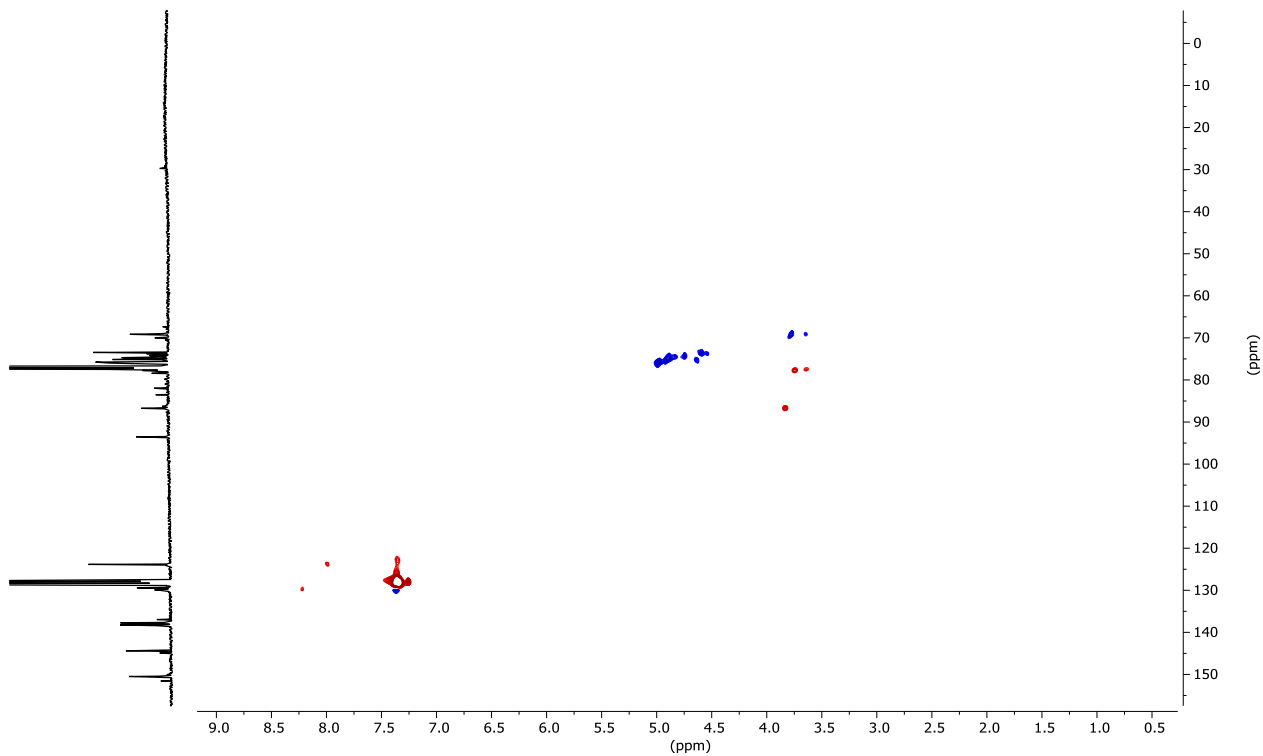

Compound 27

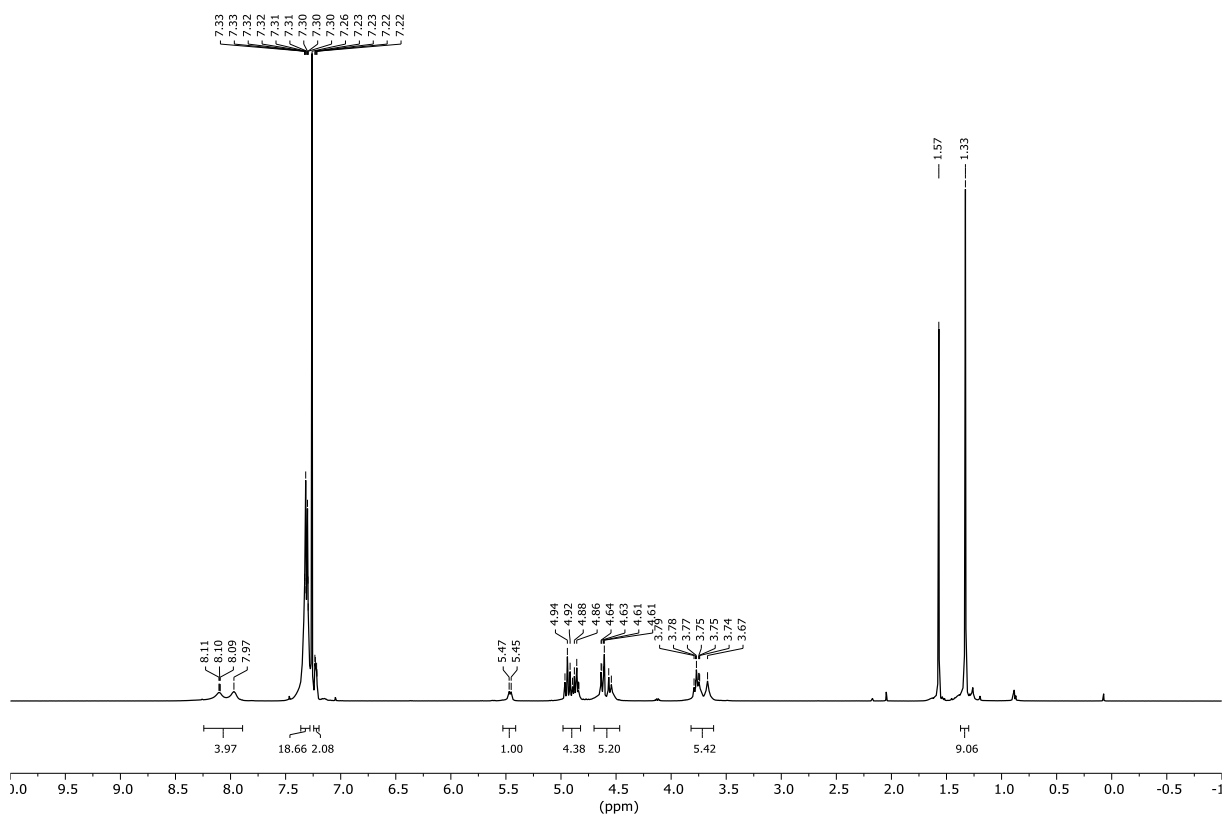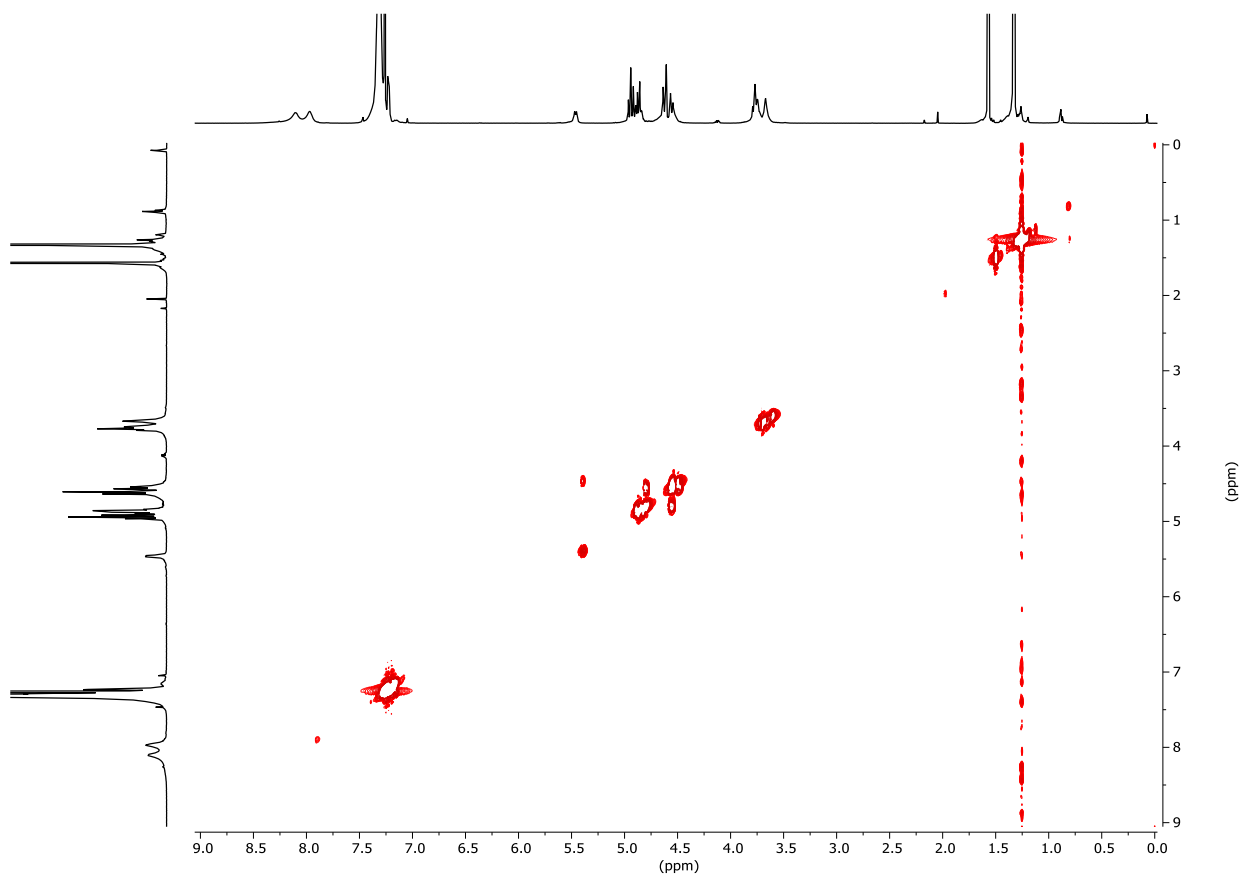

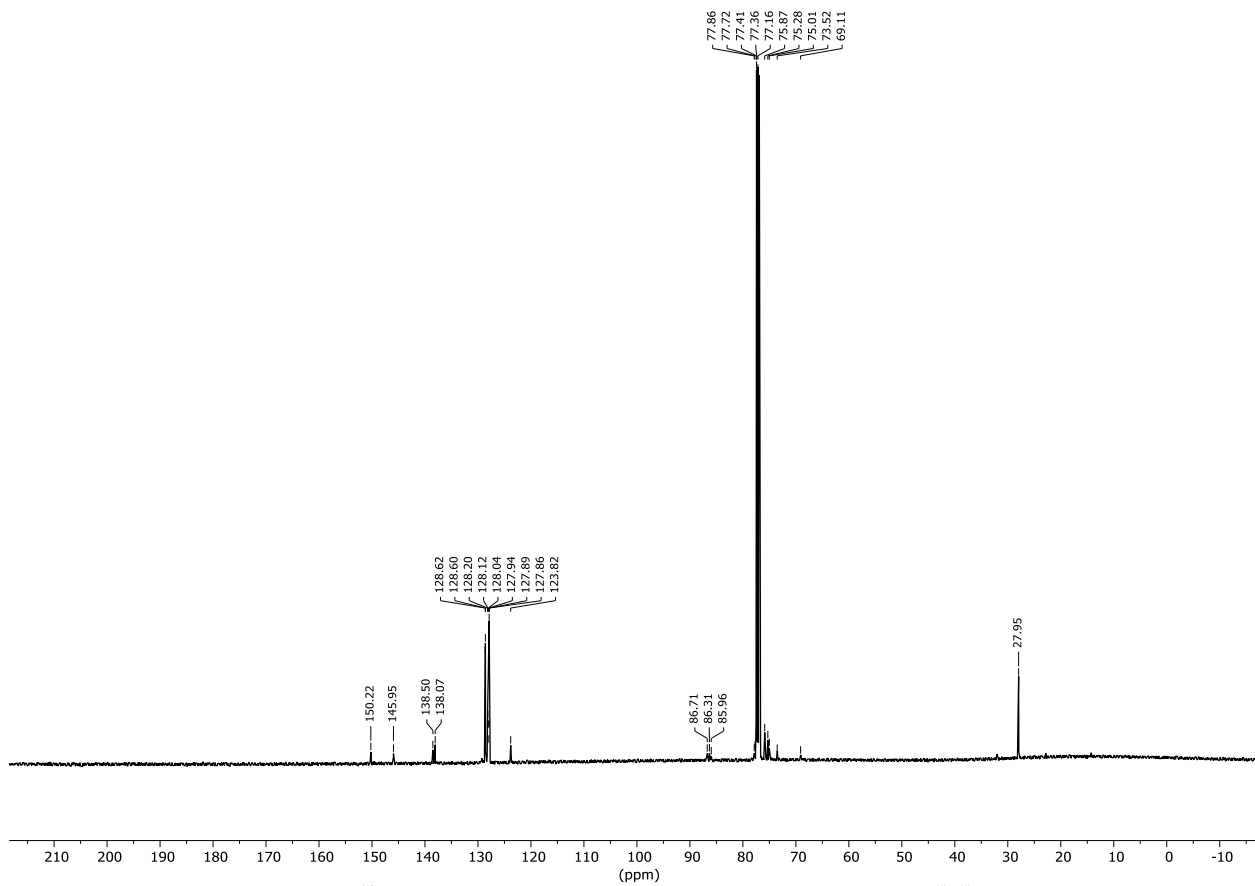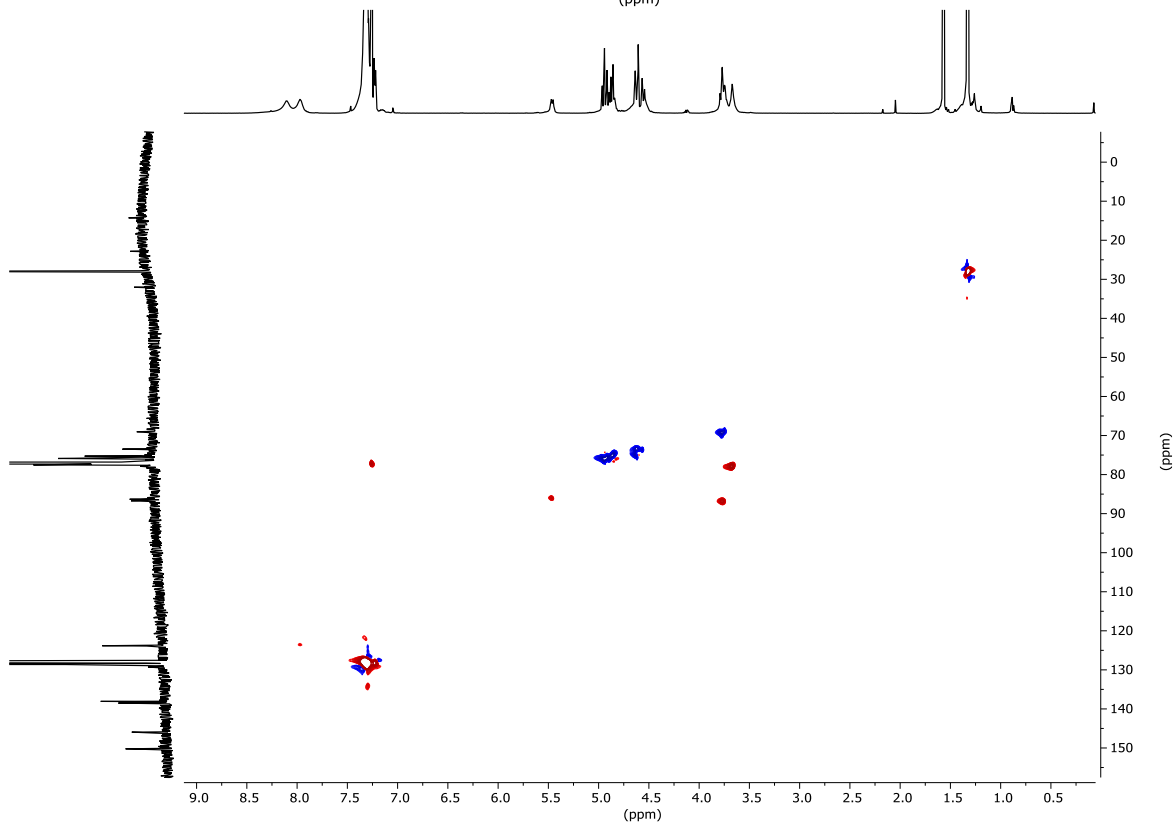

Compound 27 $\alpha/\beta$

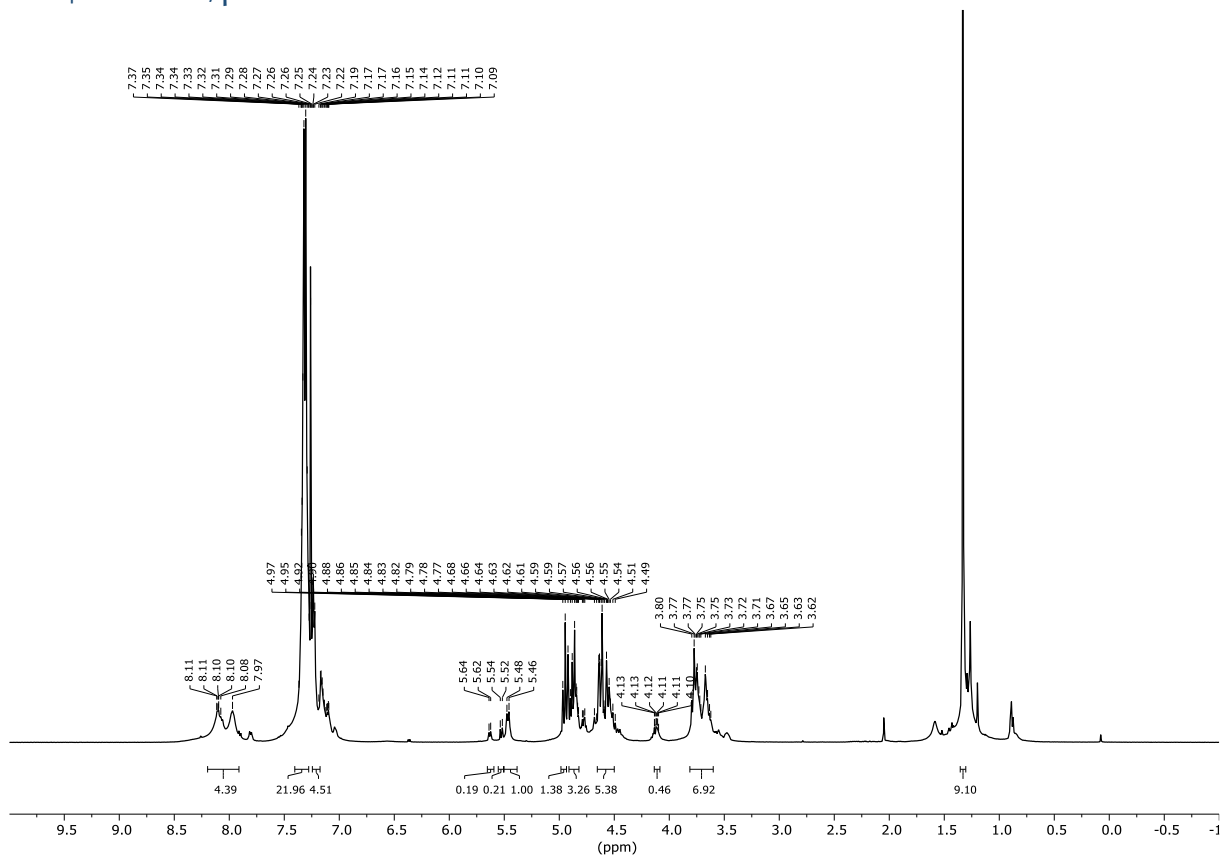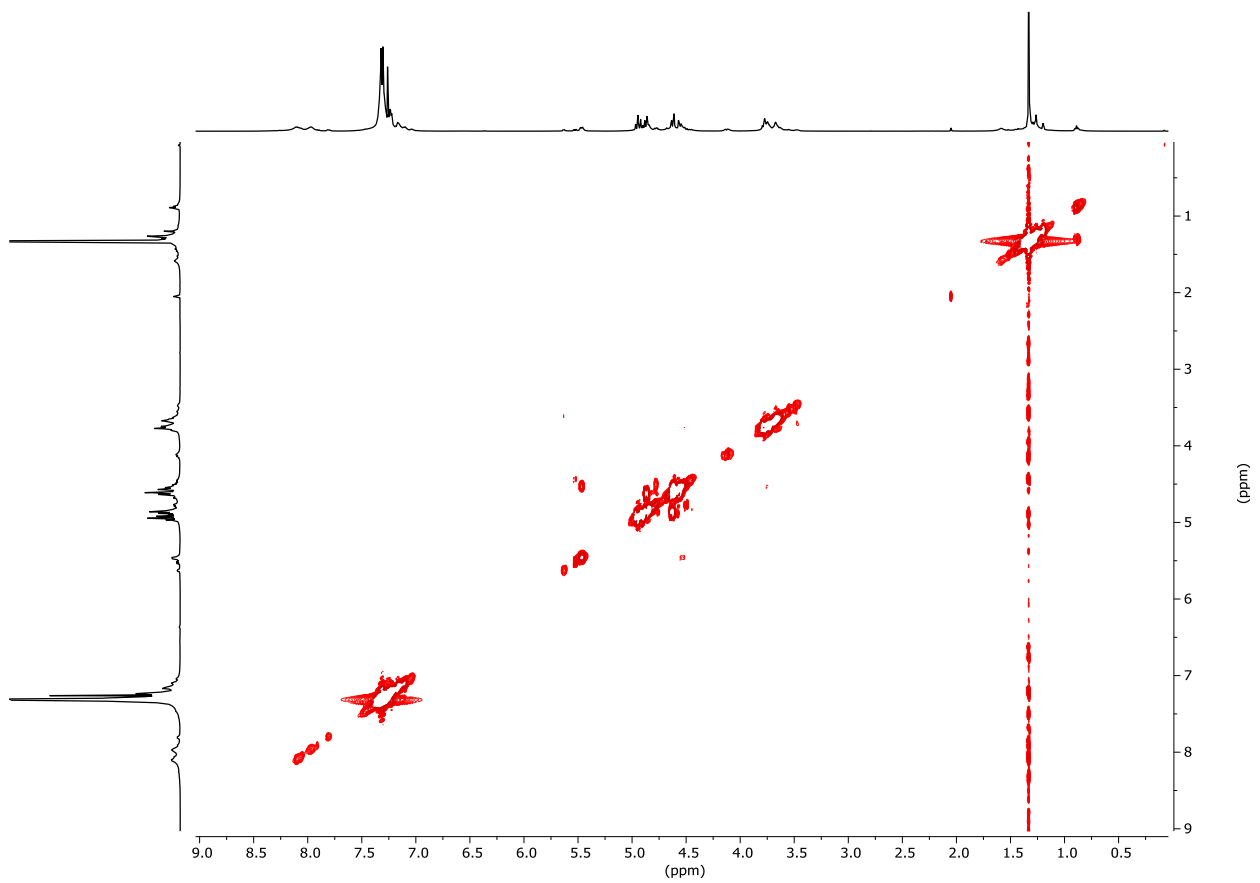



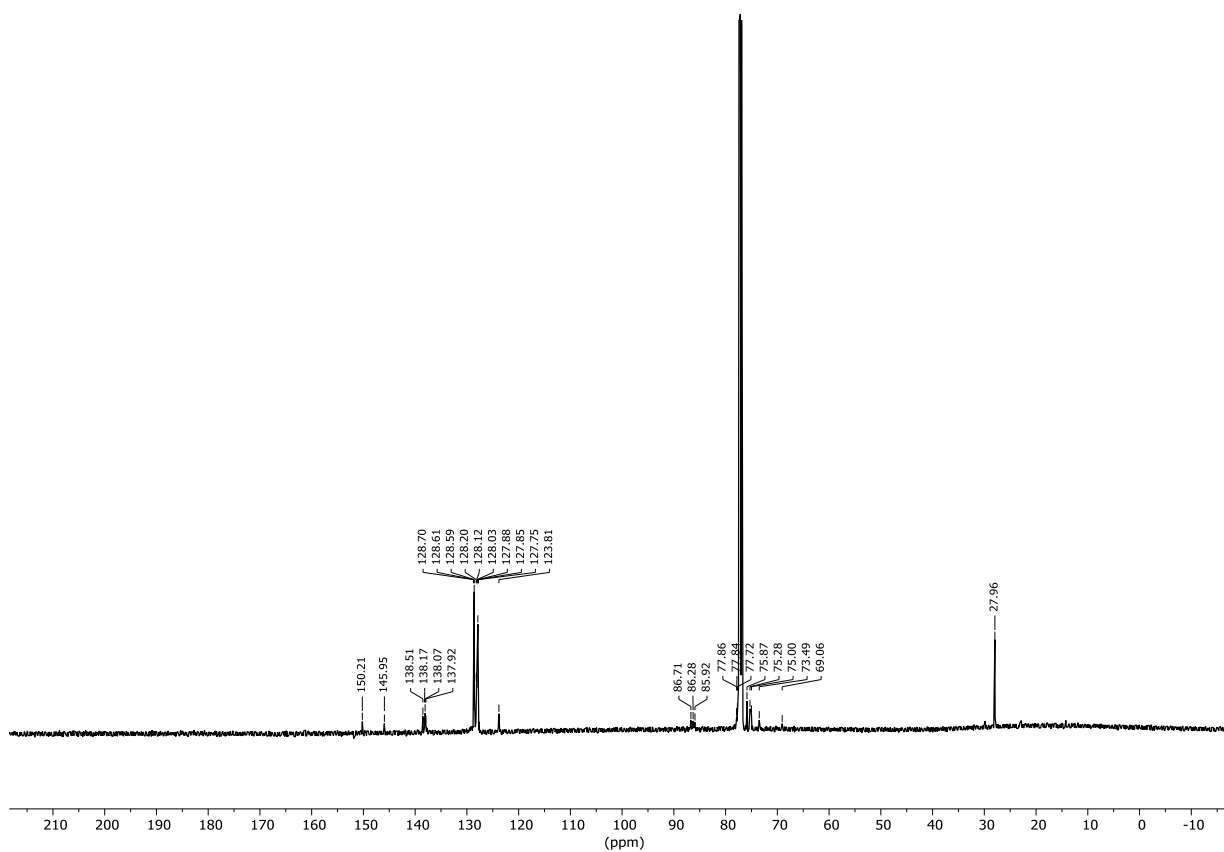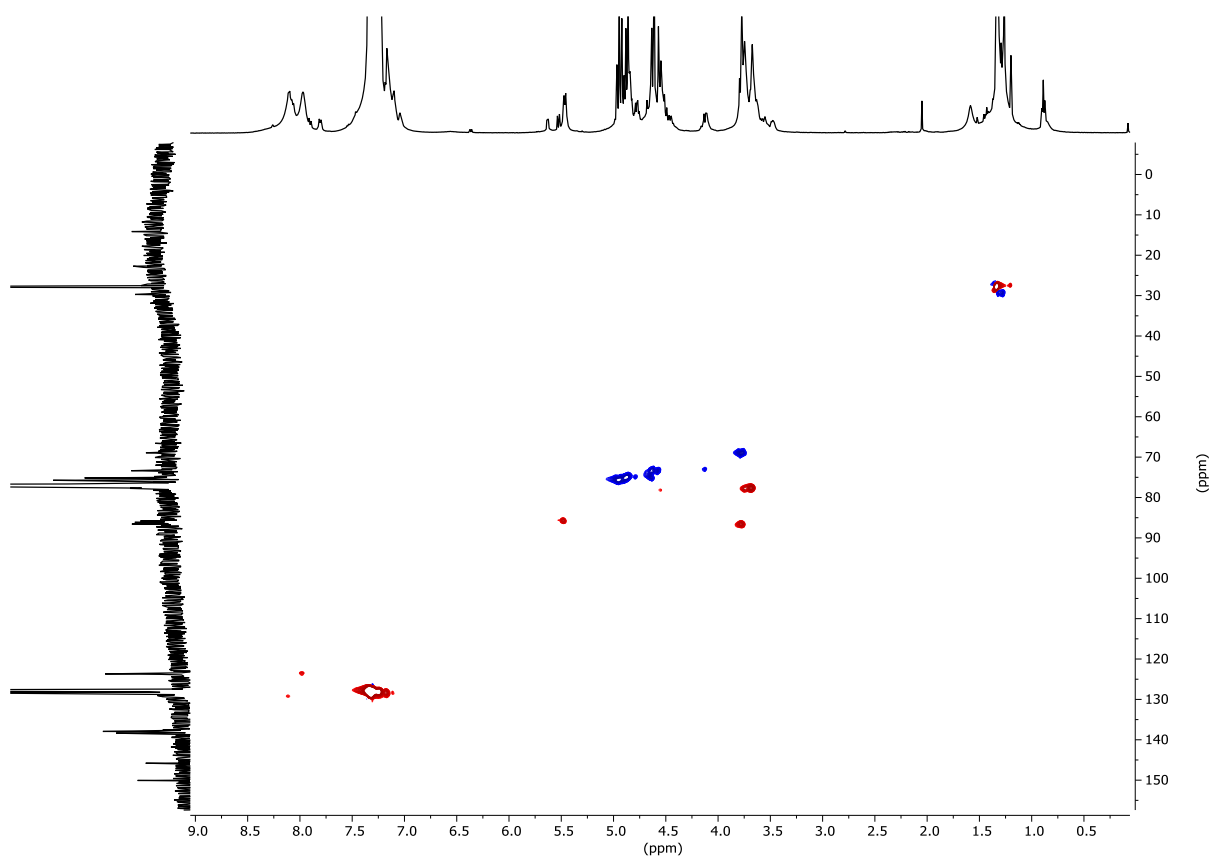

Compound 28

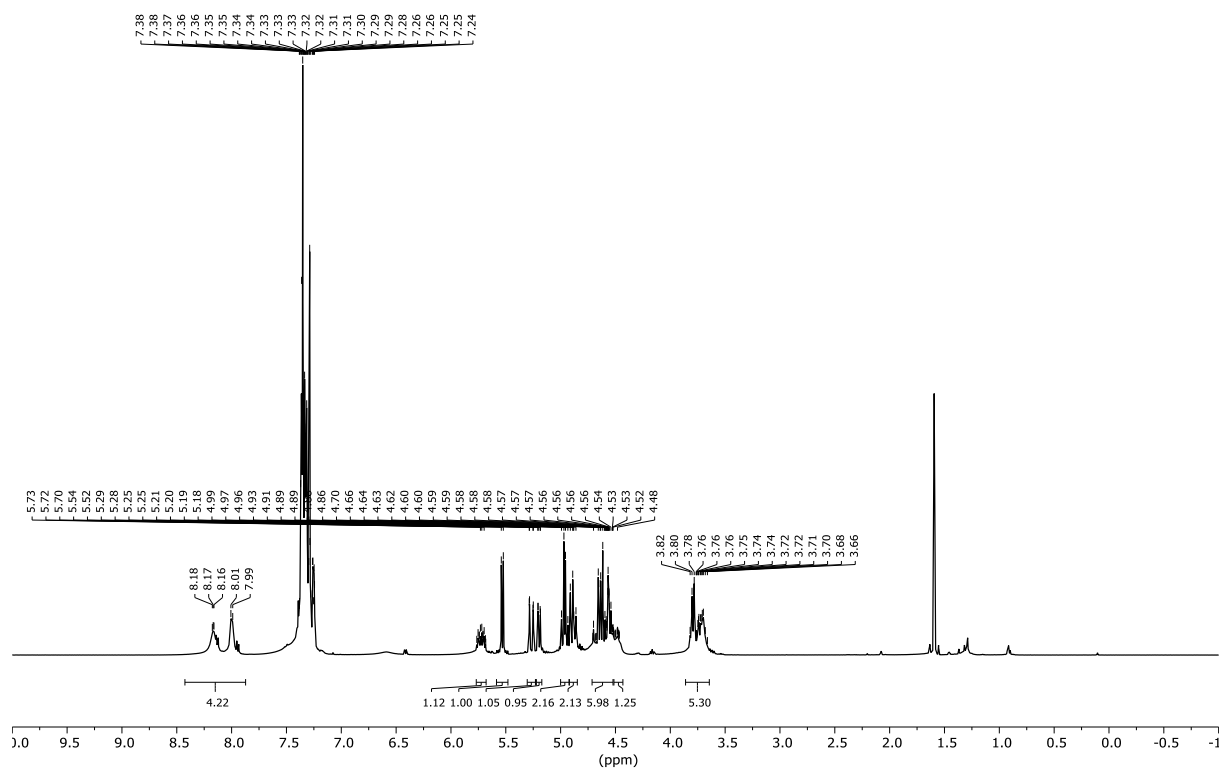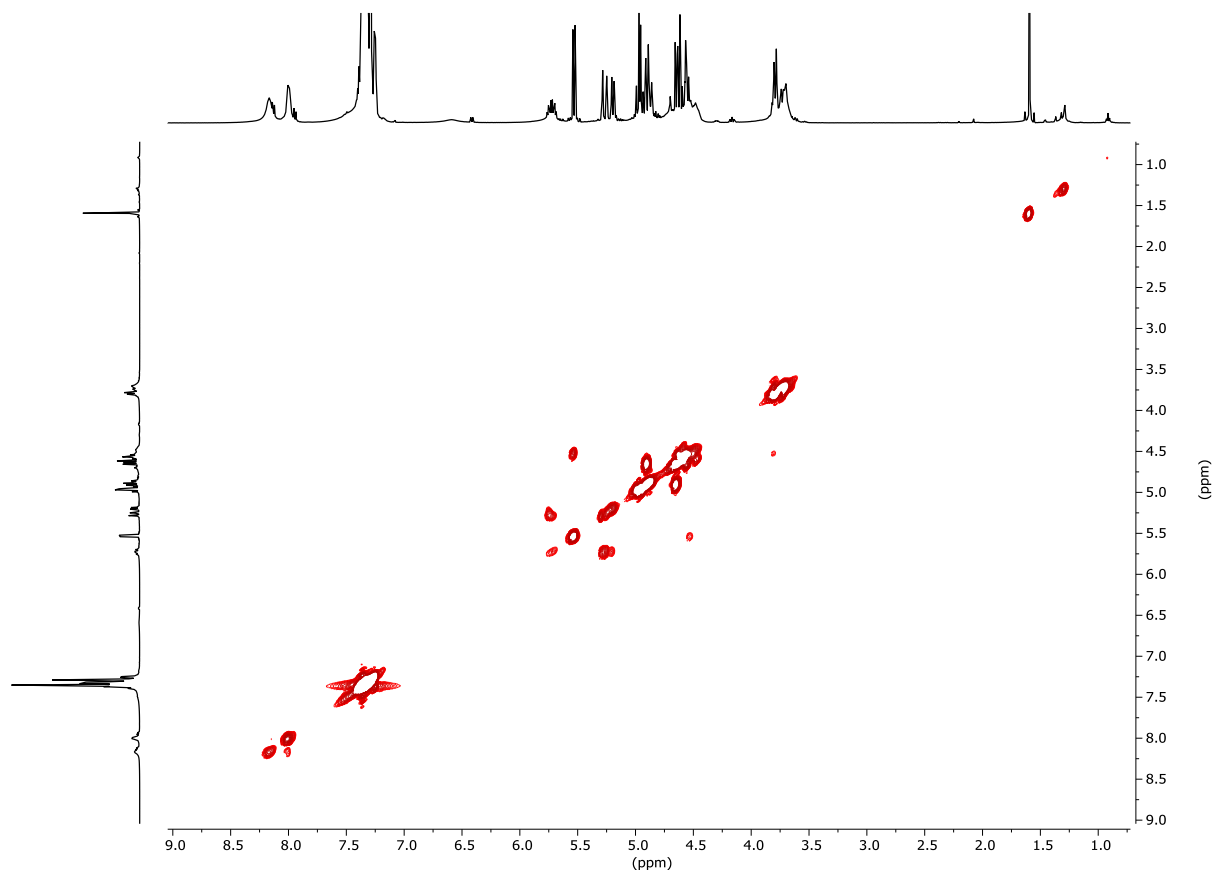

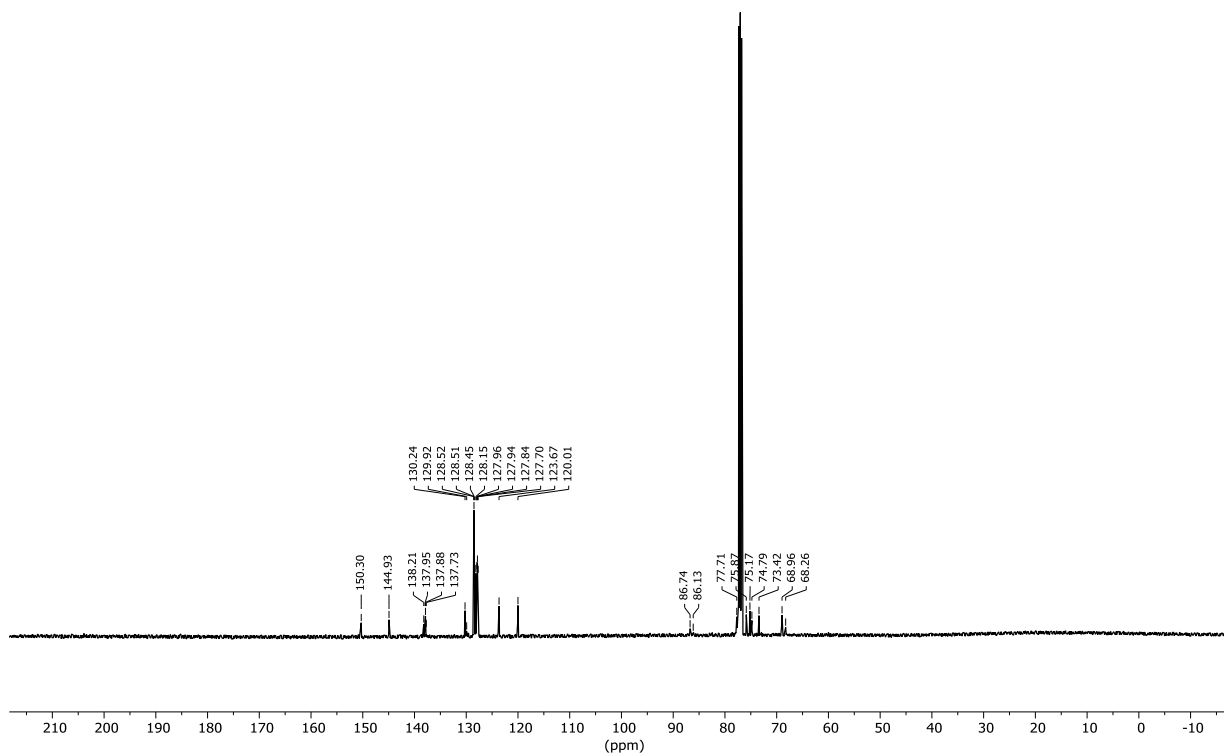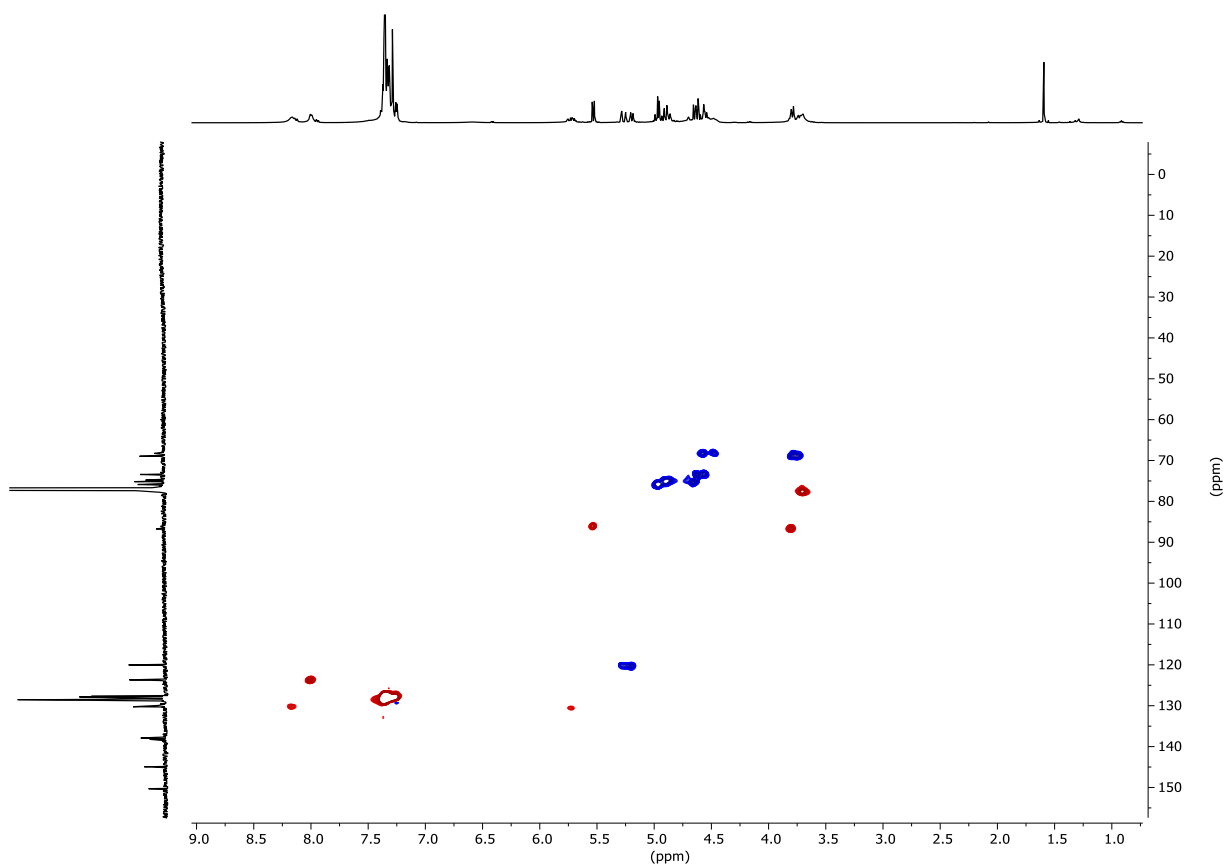

Compound 28 $\alpha$ / $\beta$

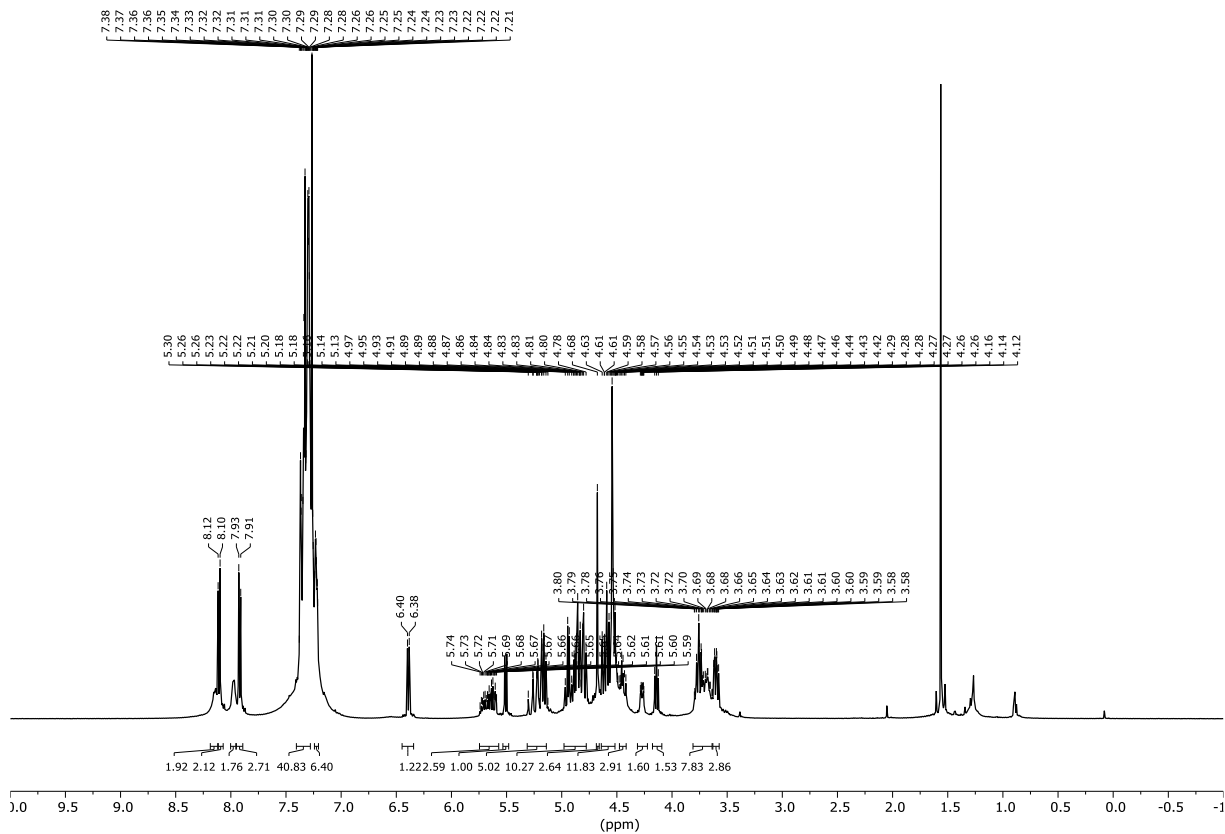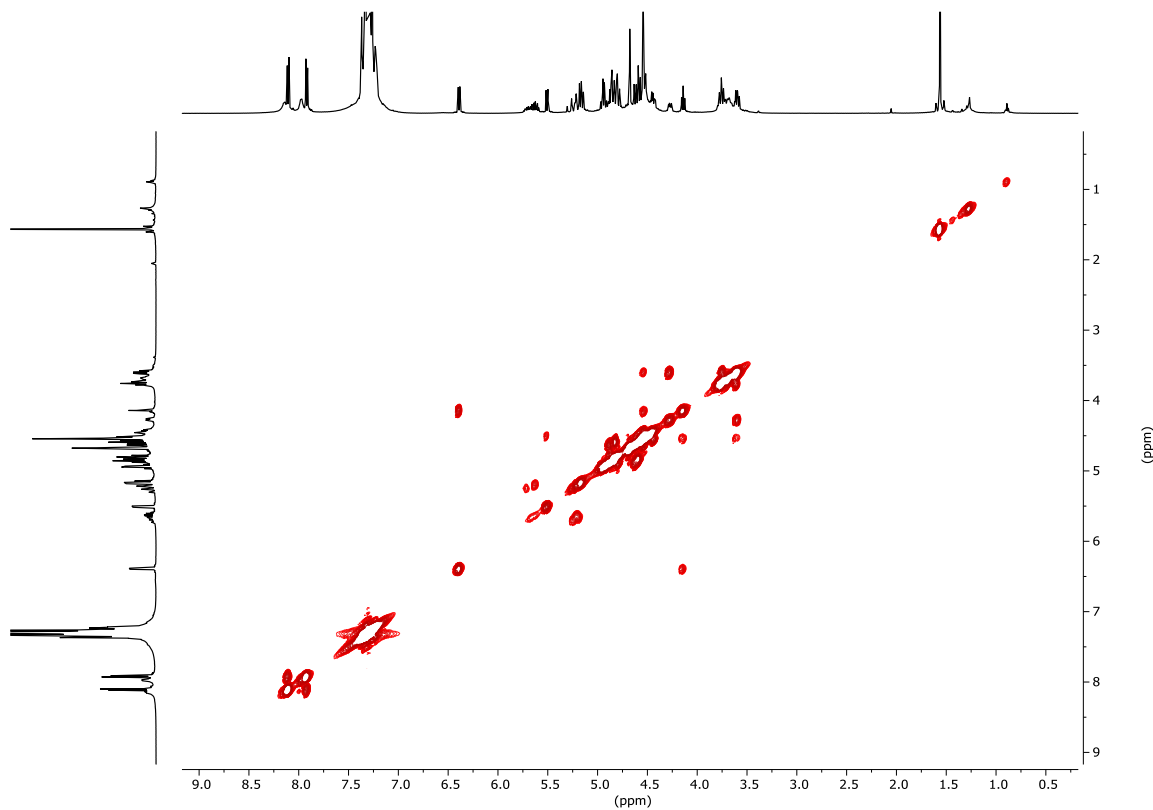

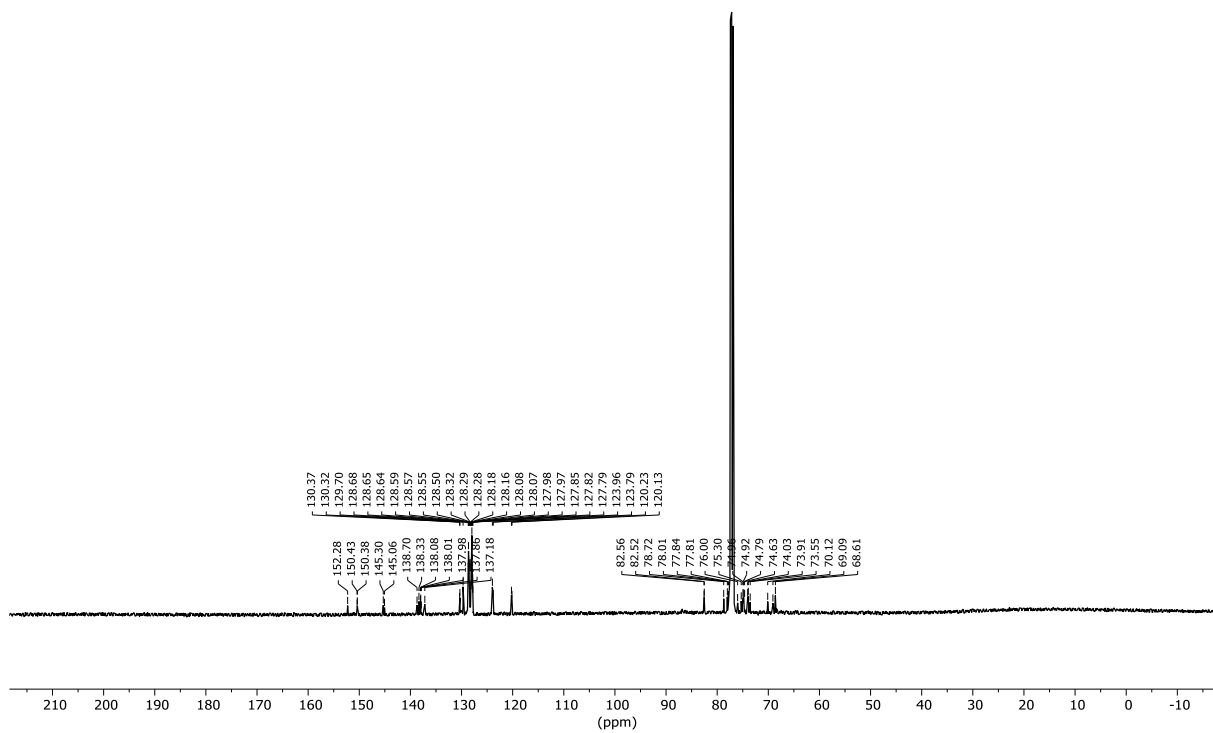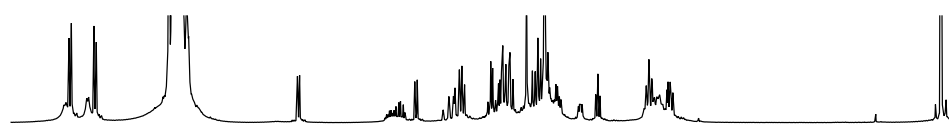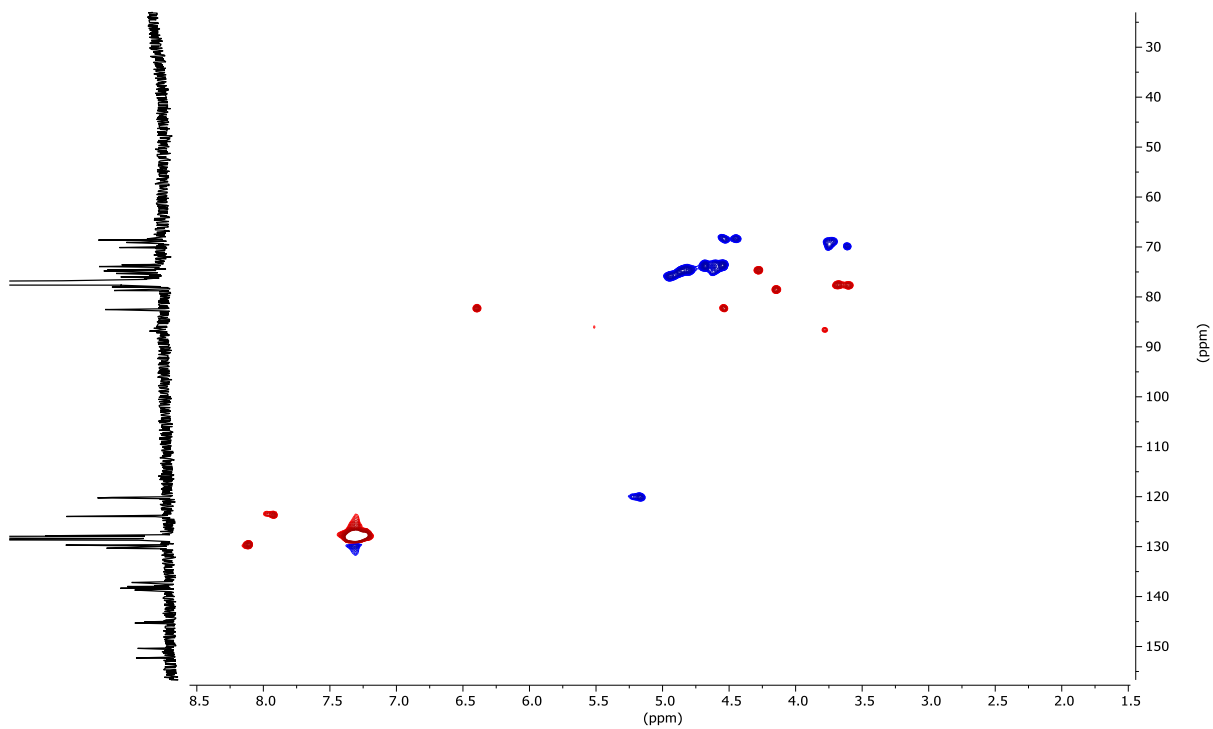

Compound 29

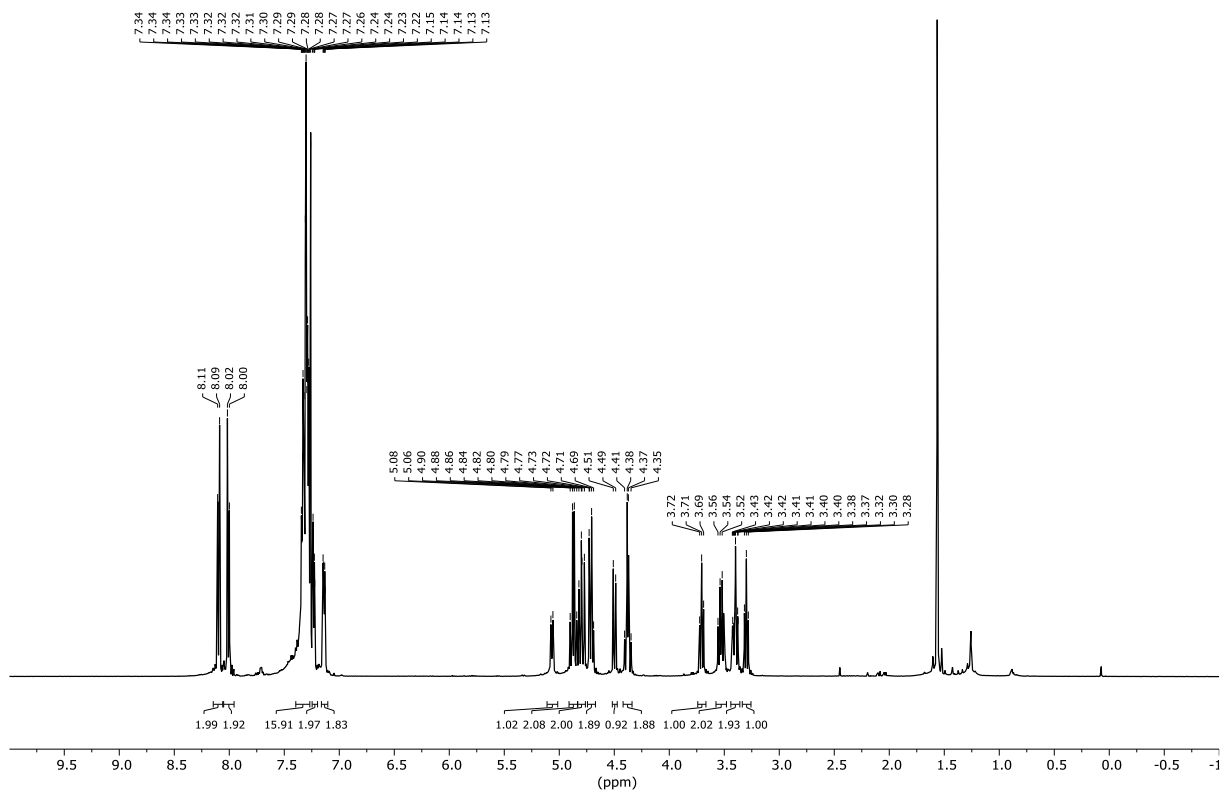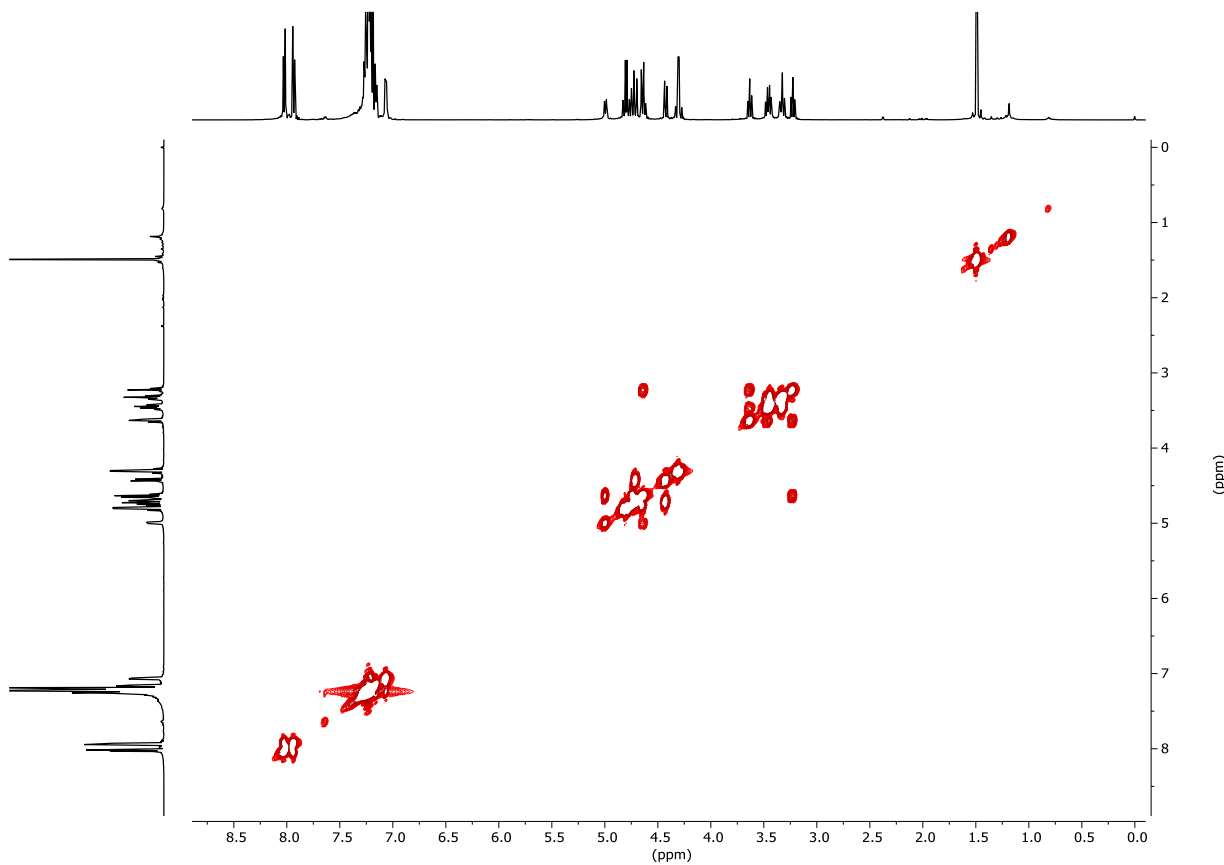

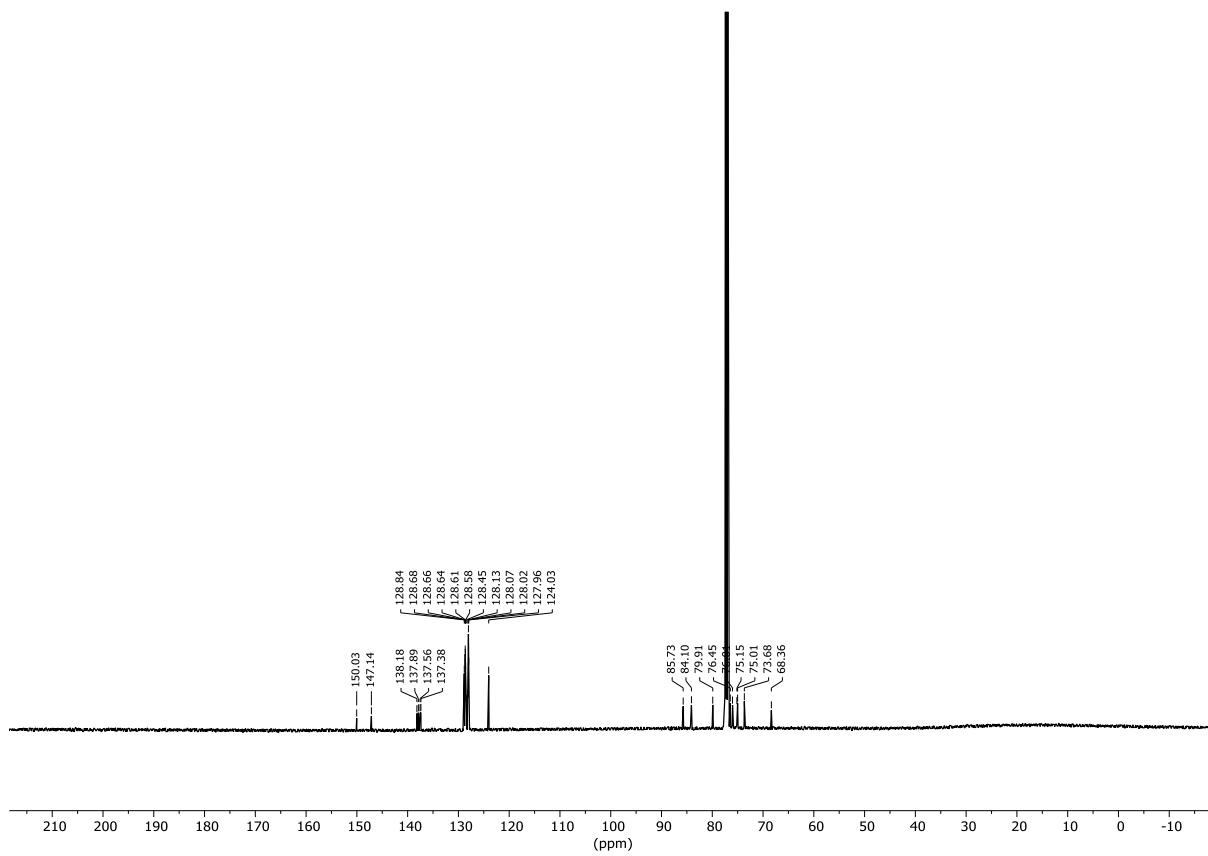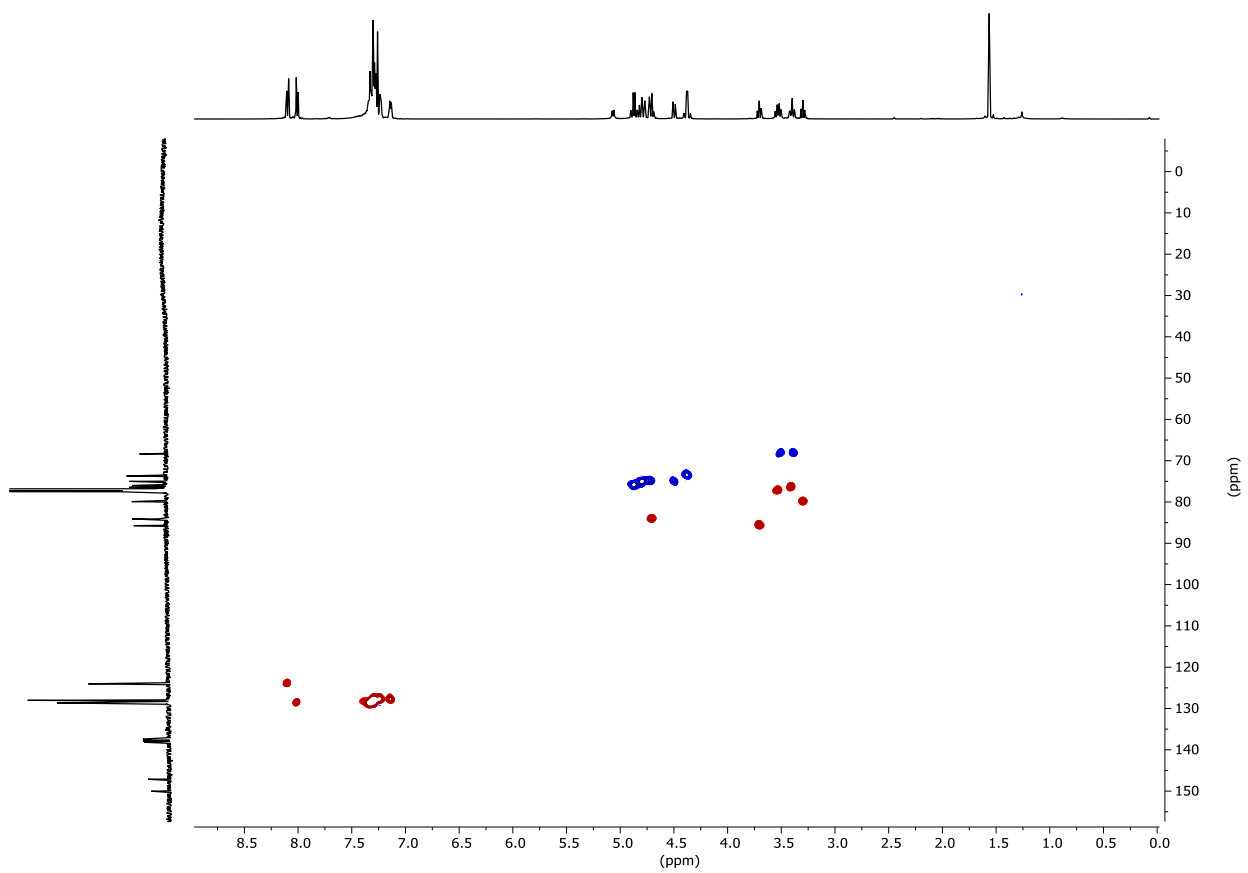

Compound 30

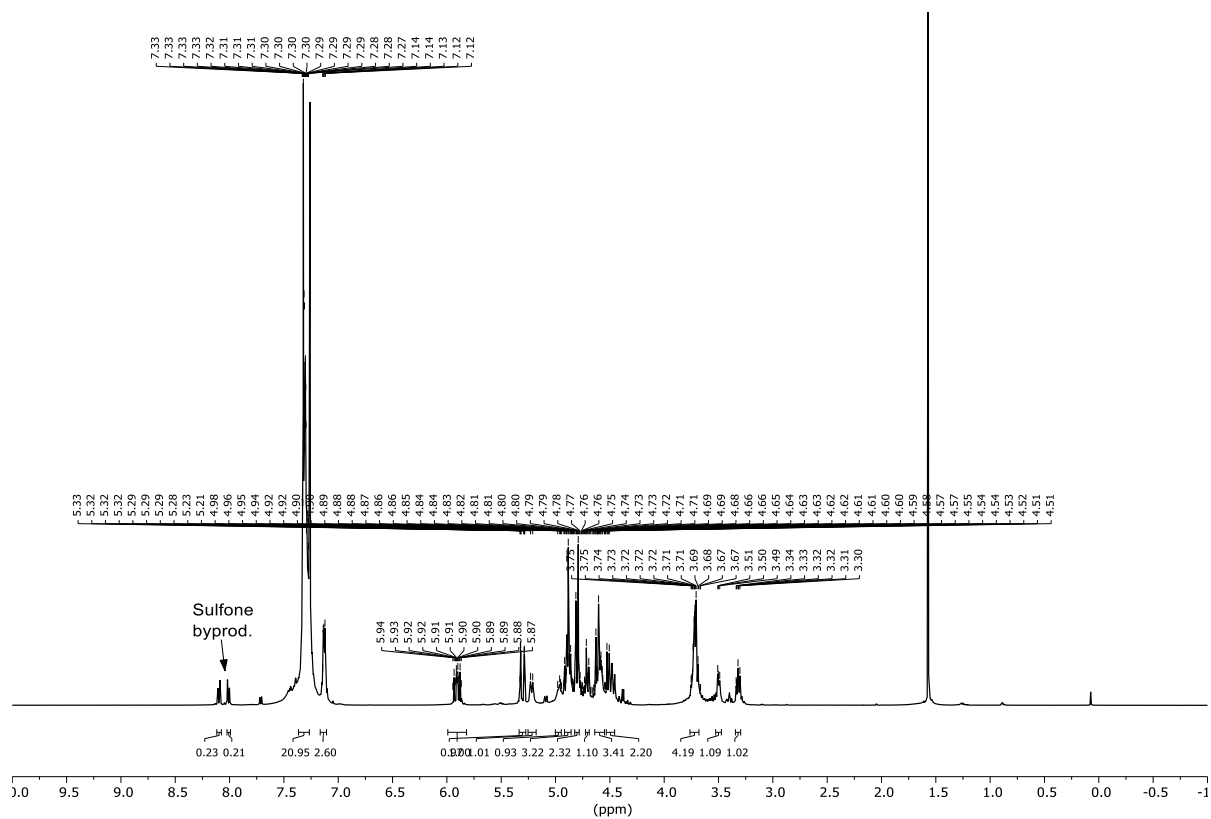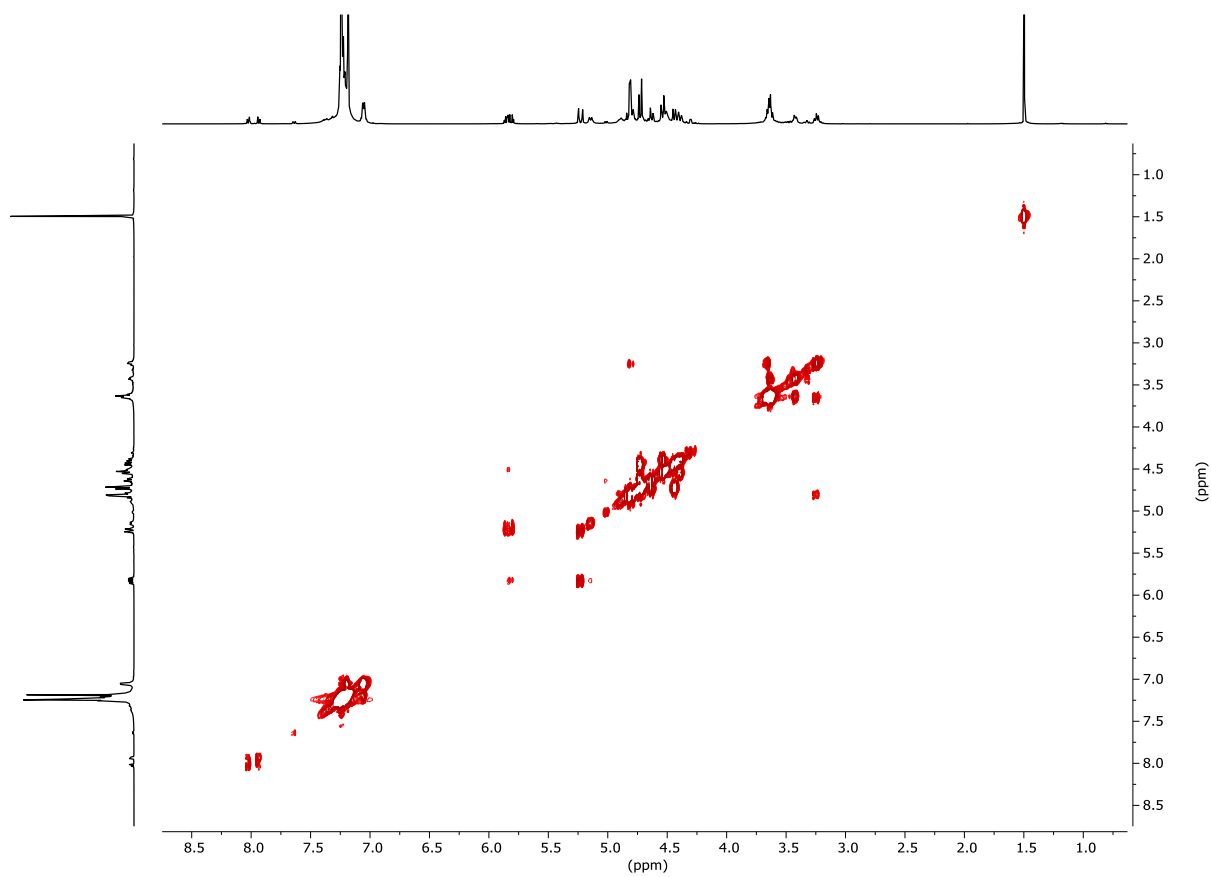



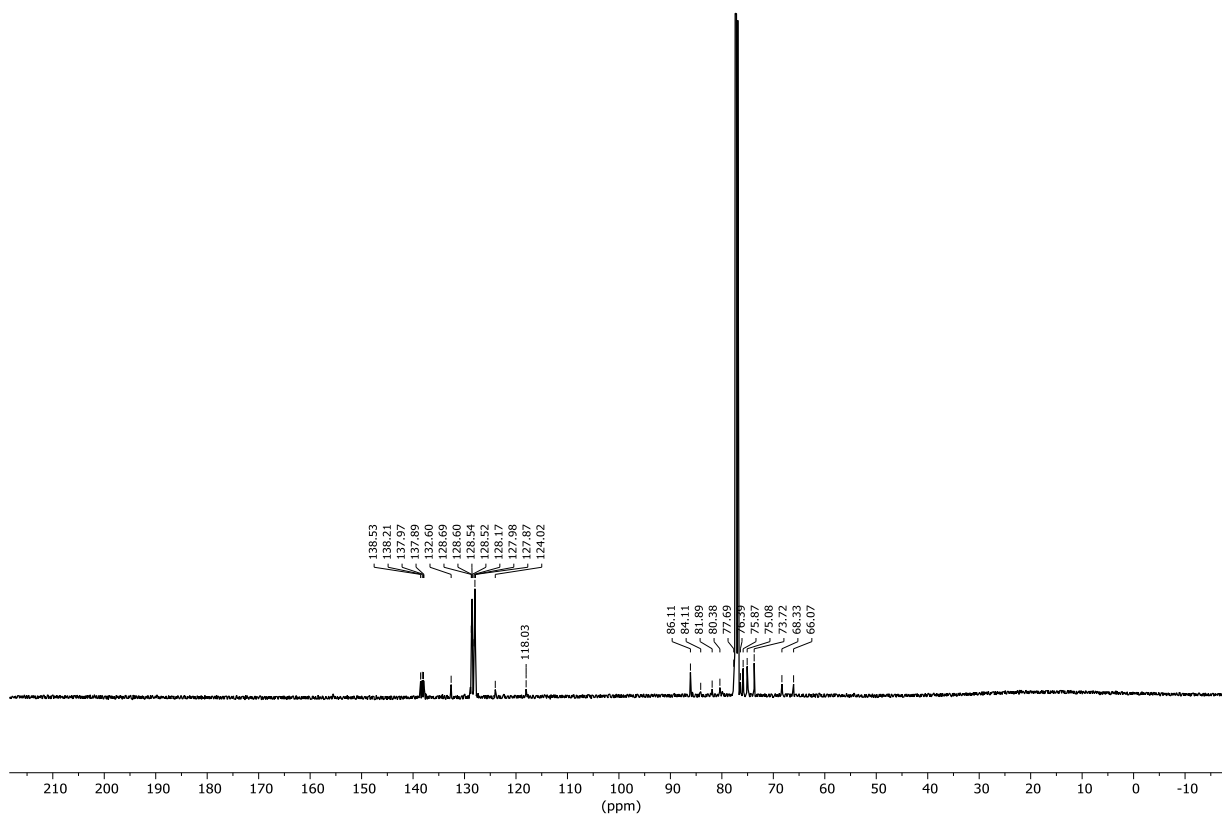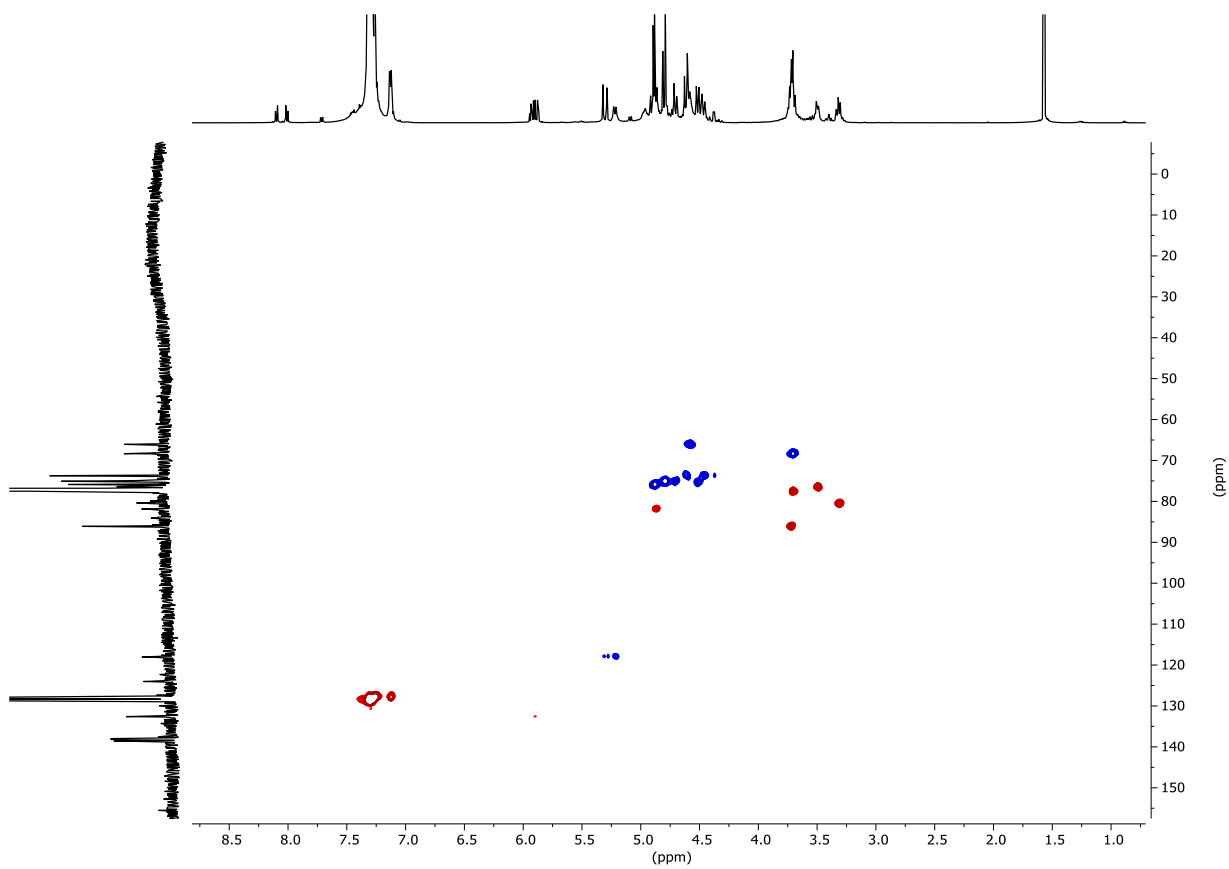

Compound 32

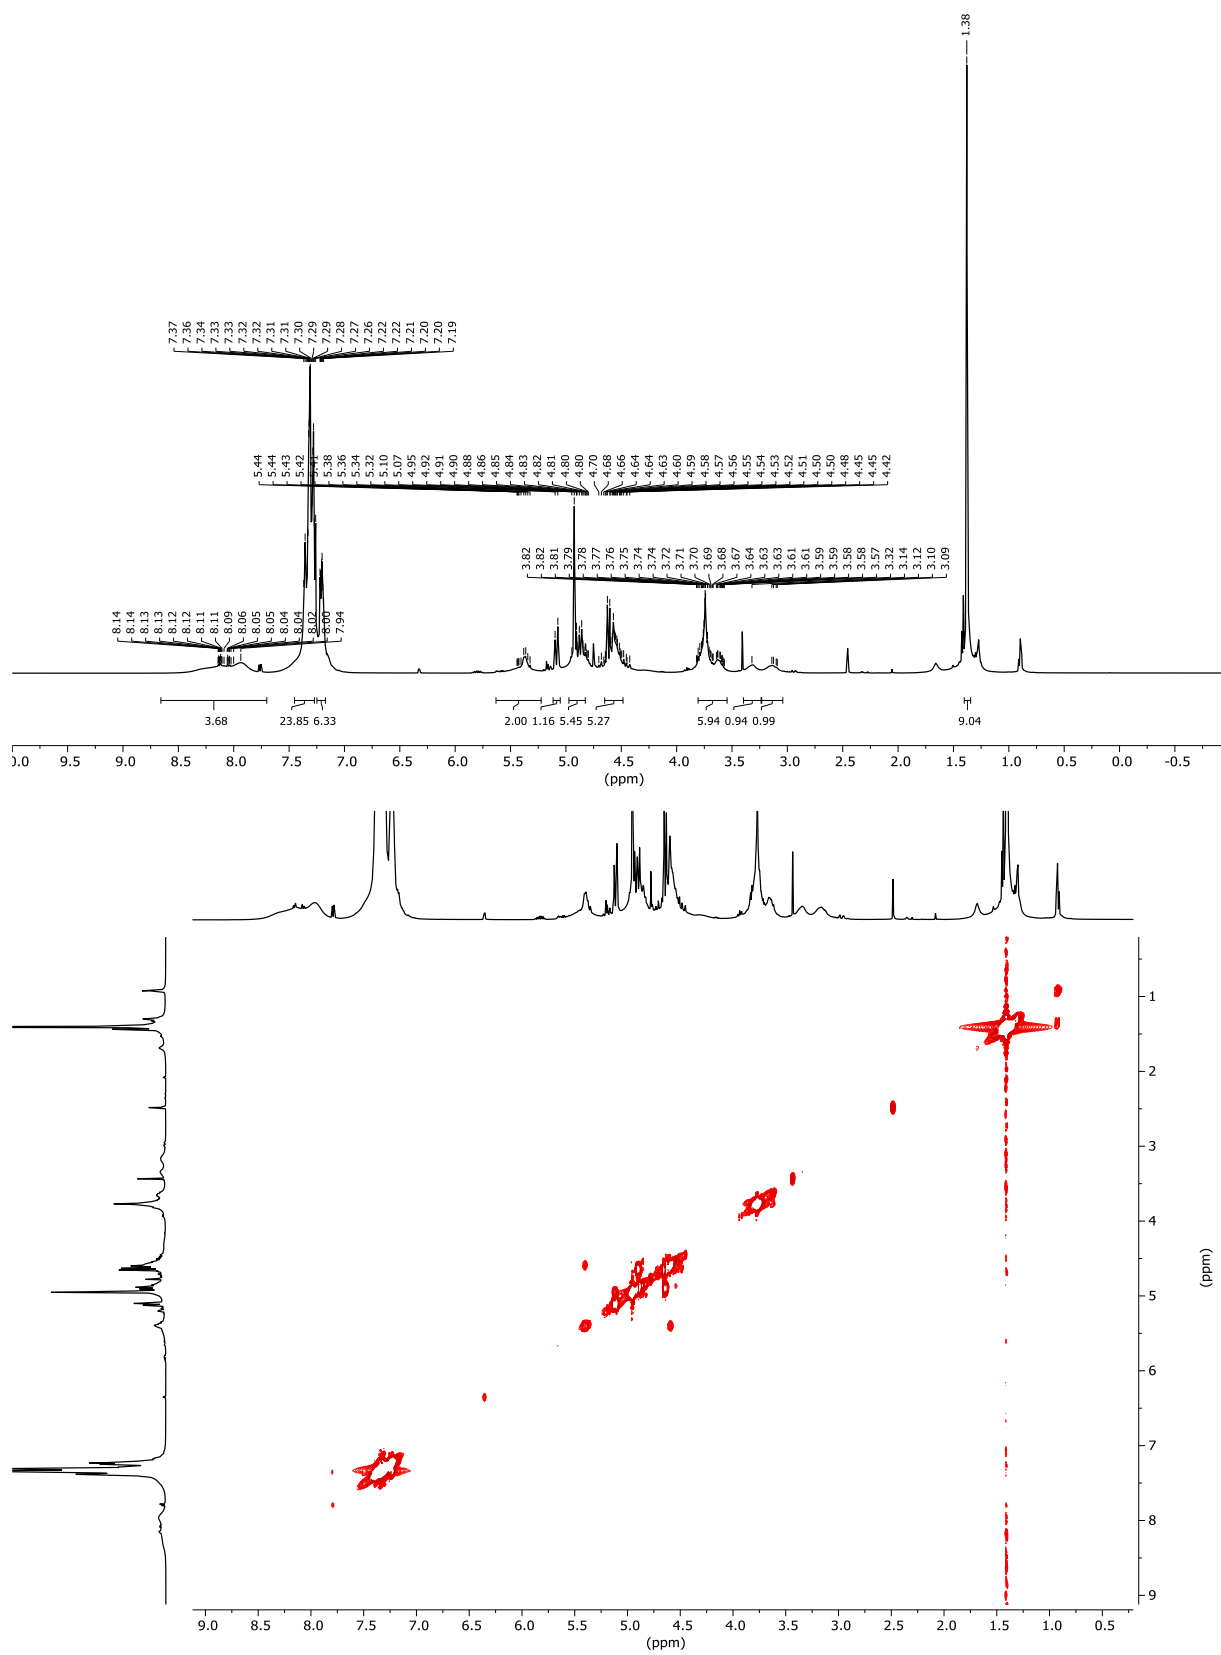

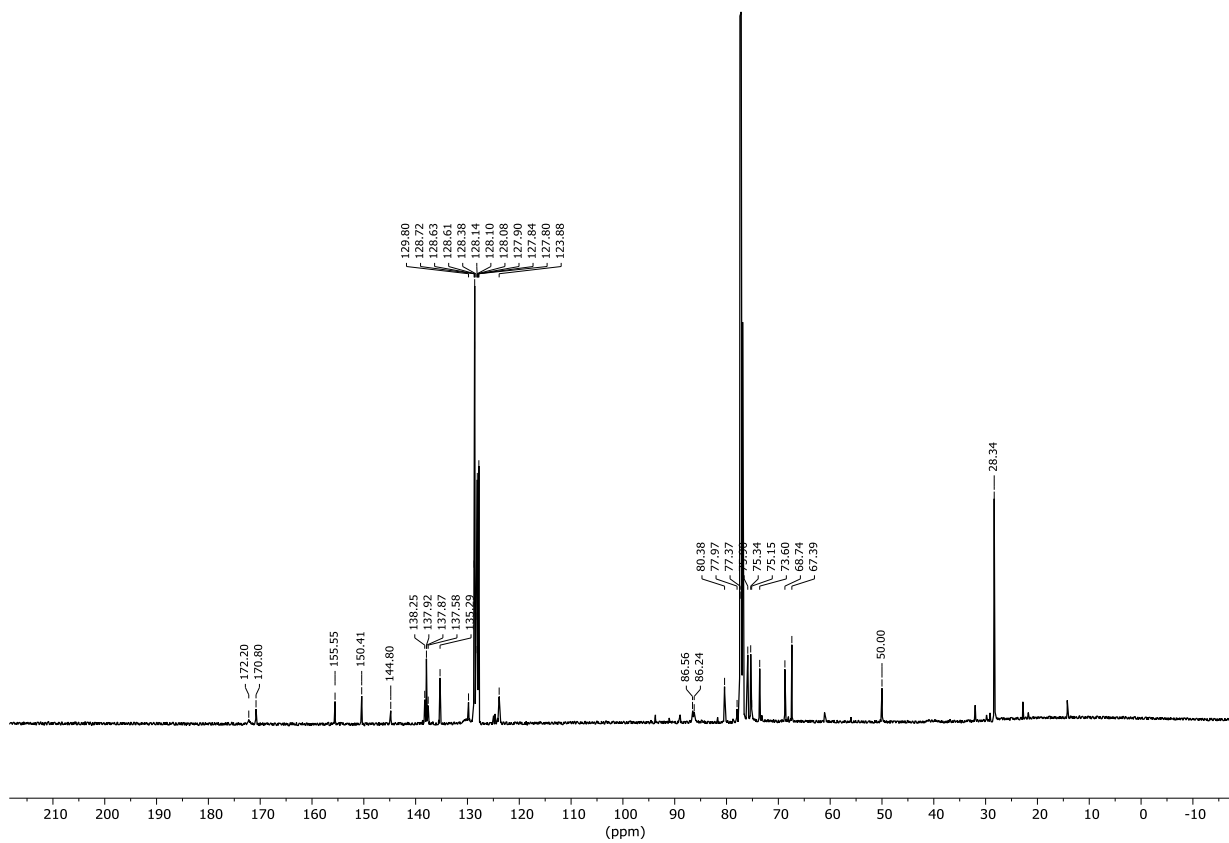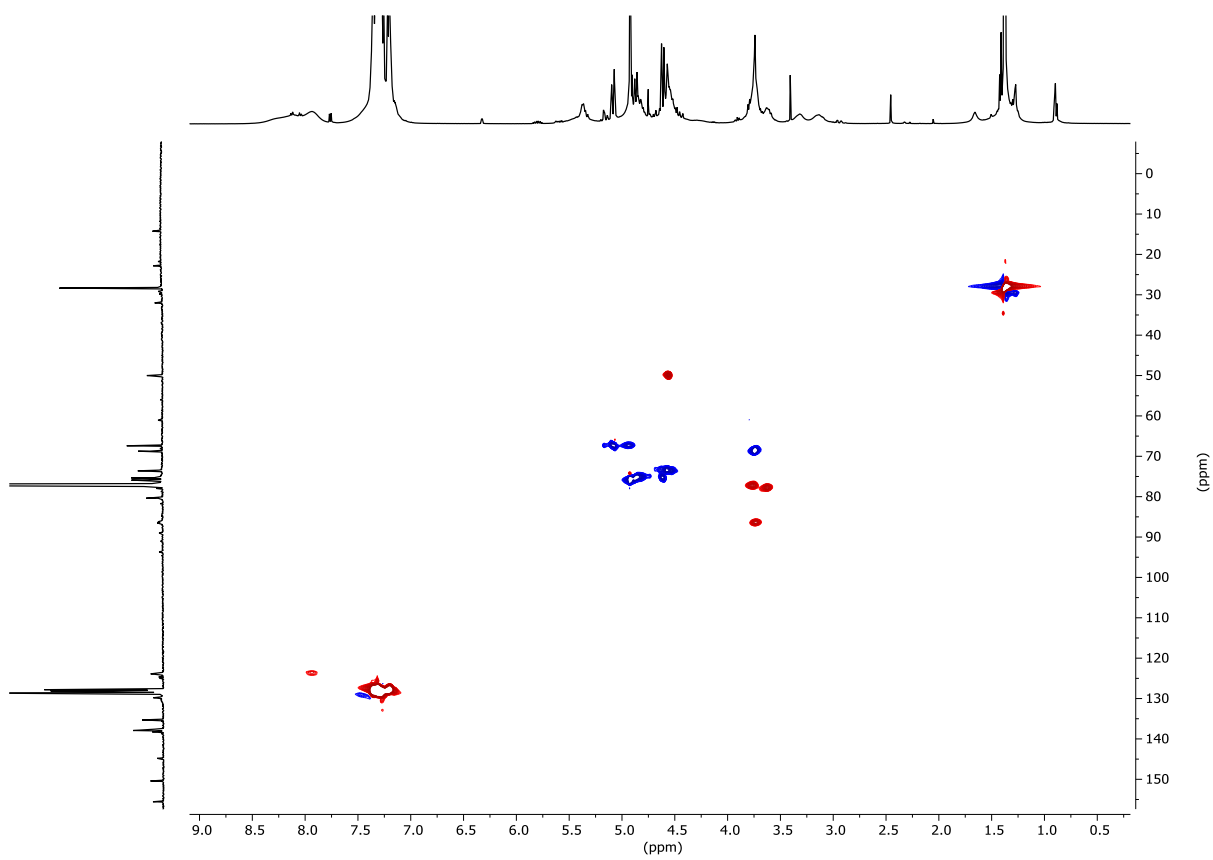



Compound 33

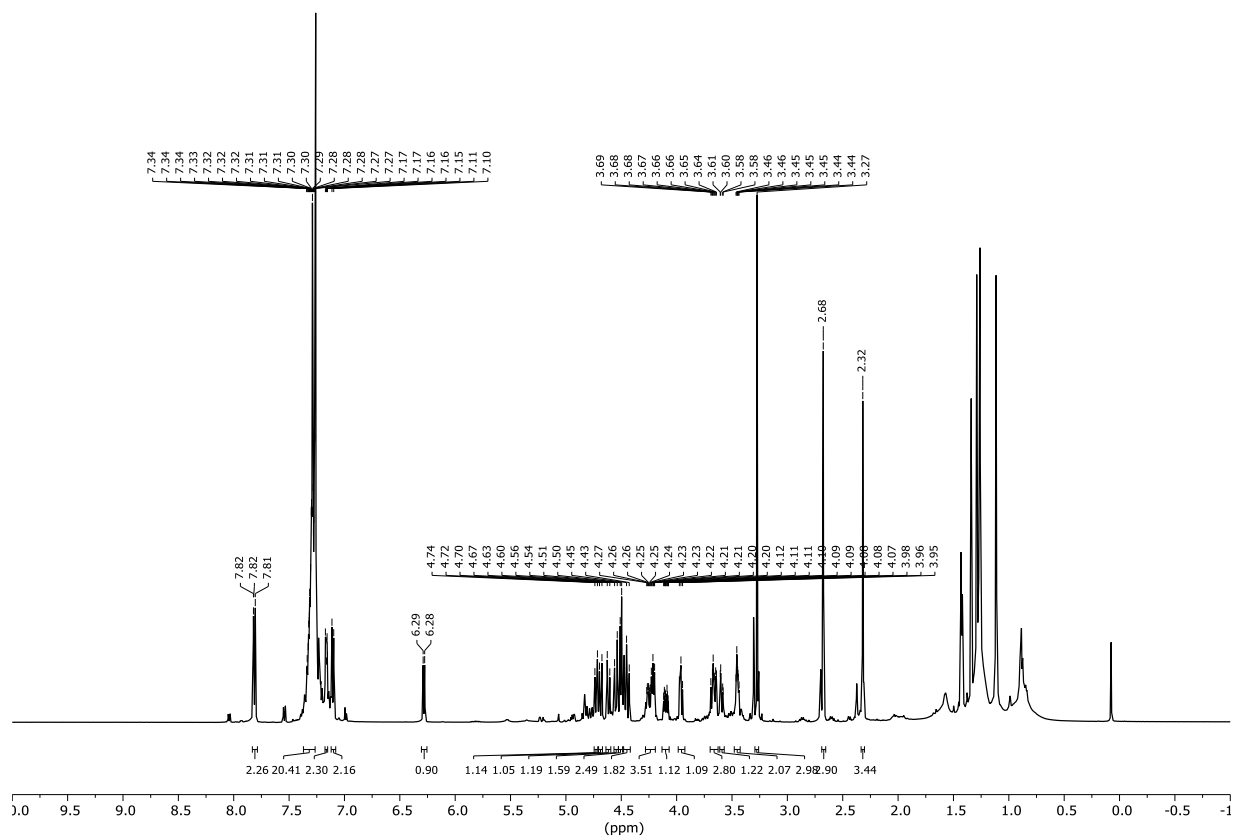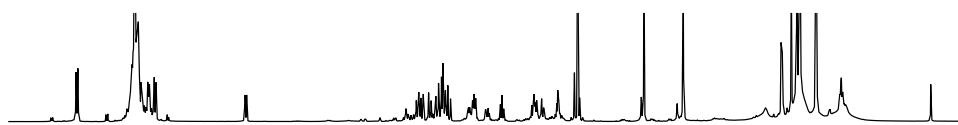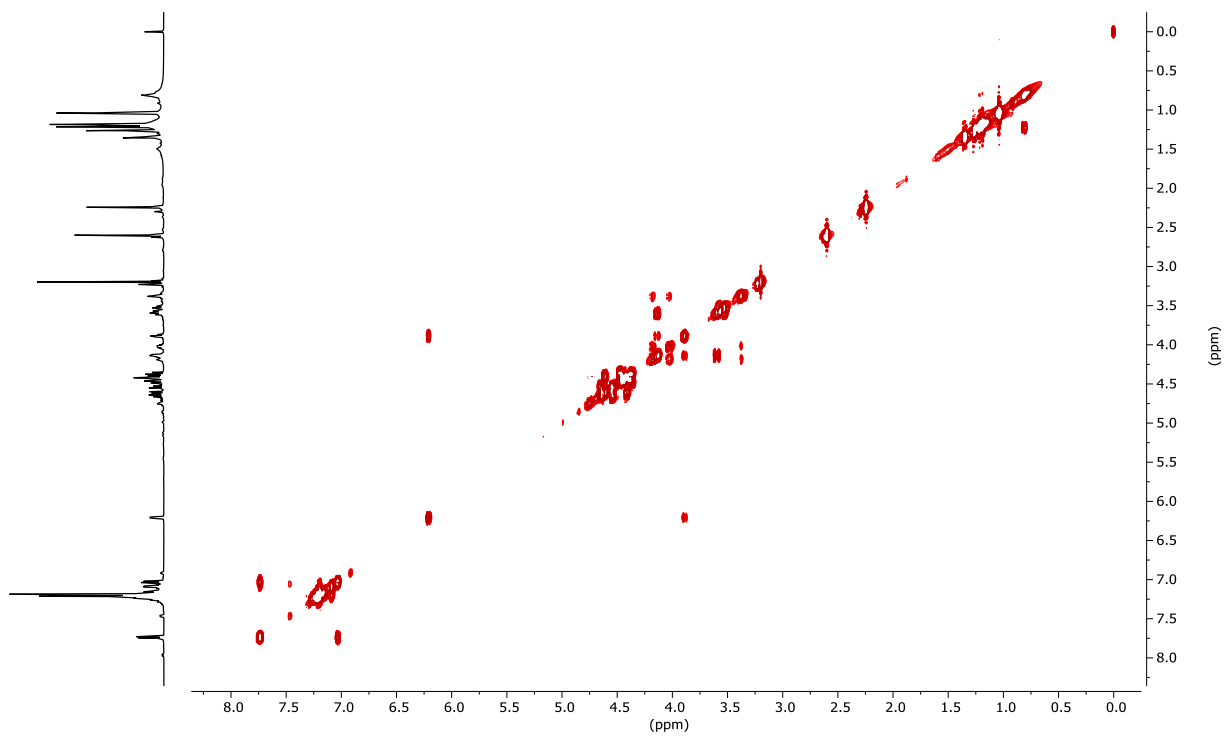

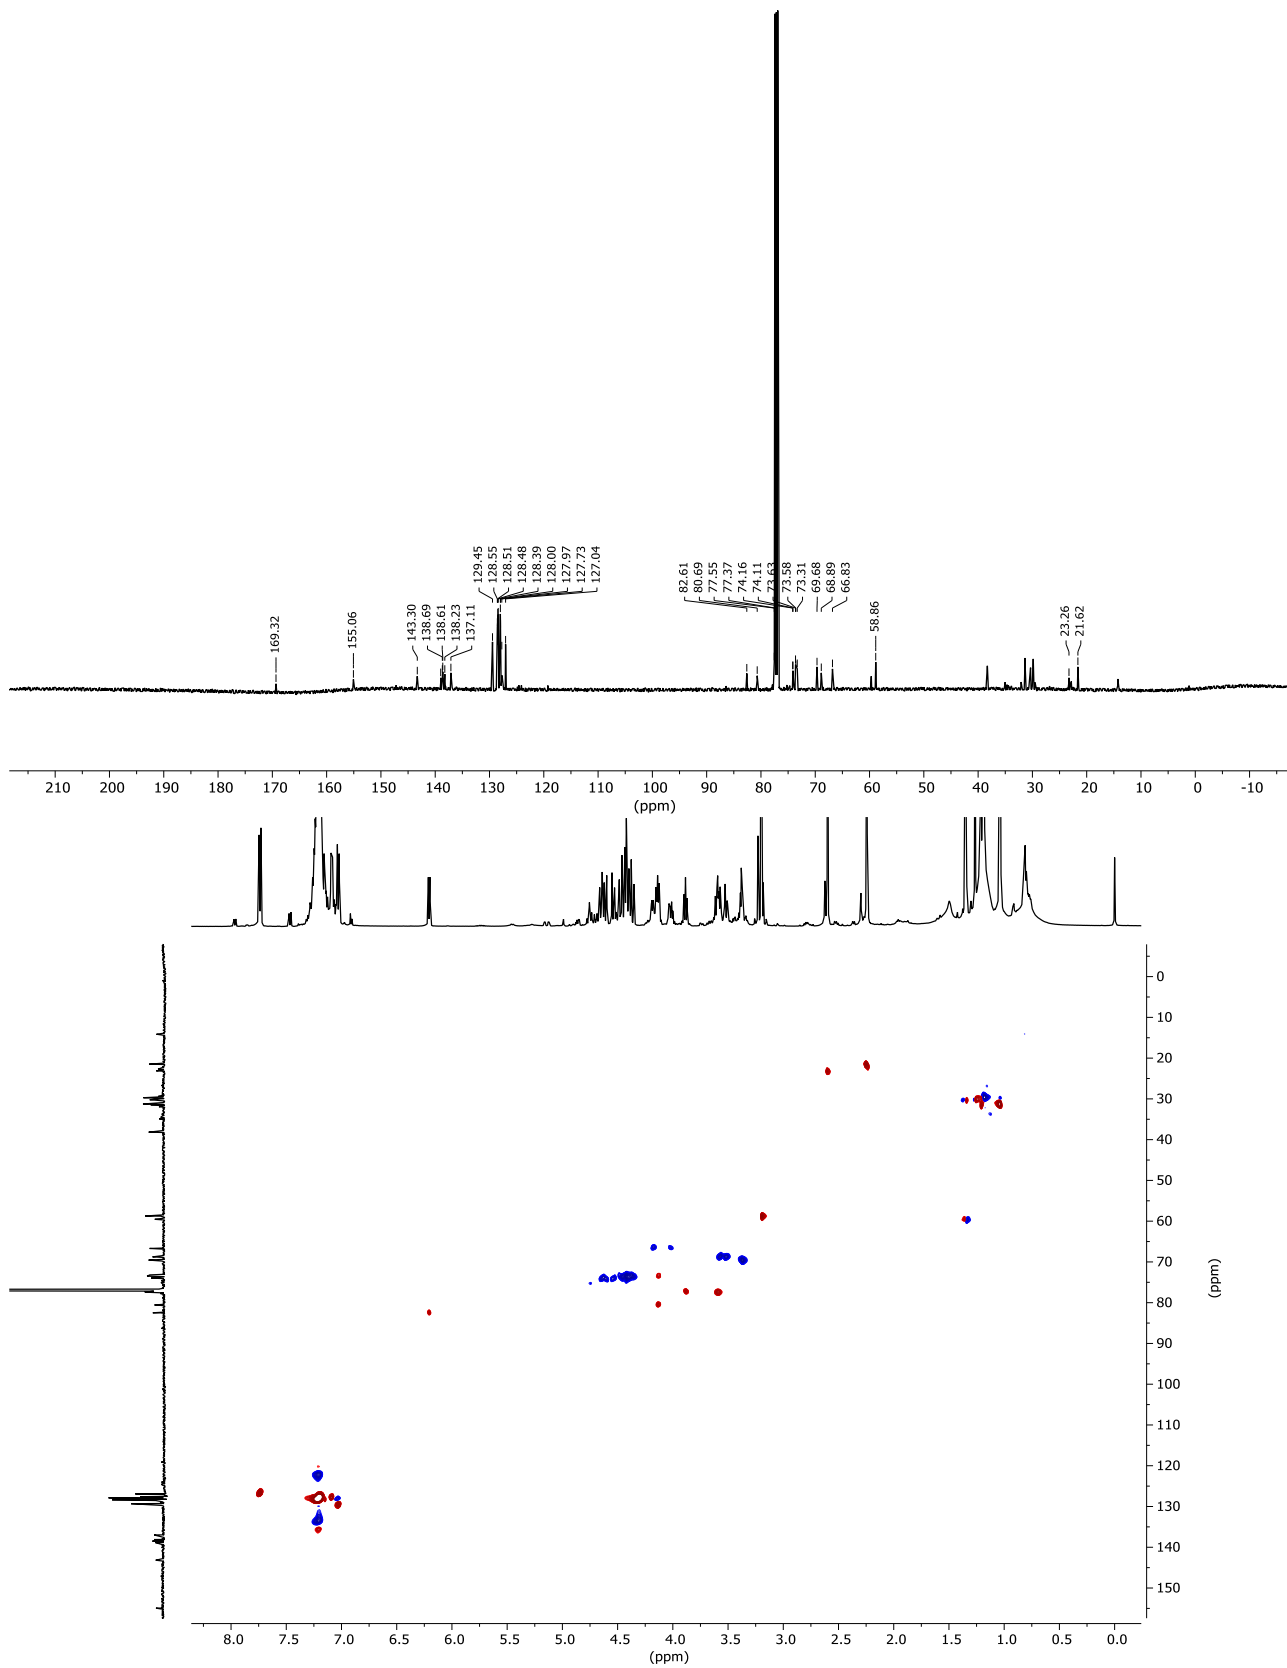

Compound S1

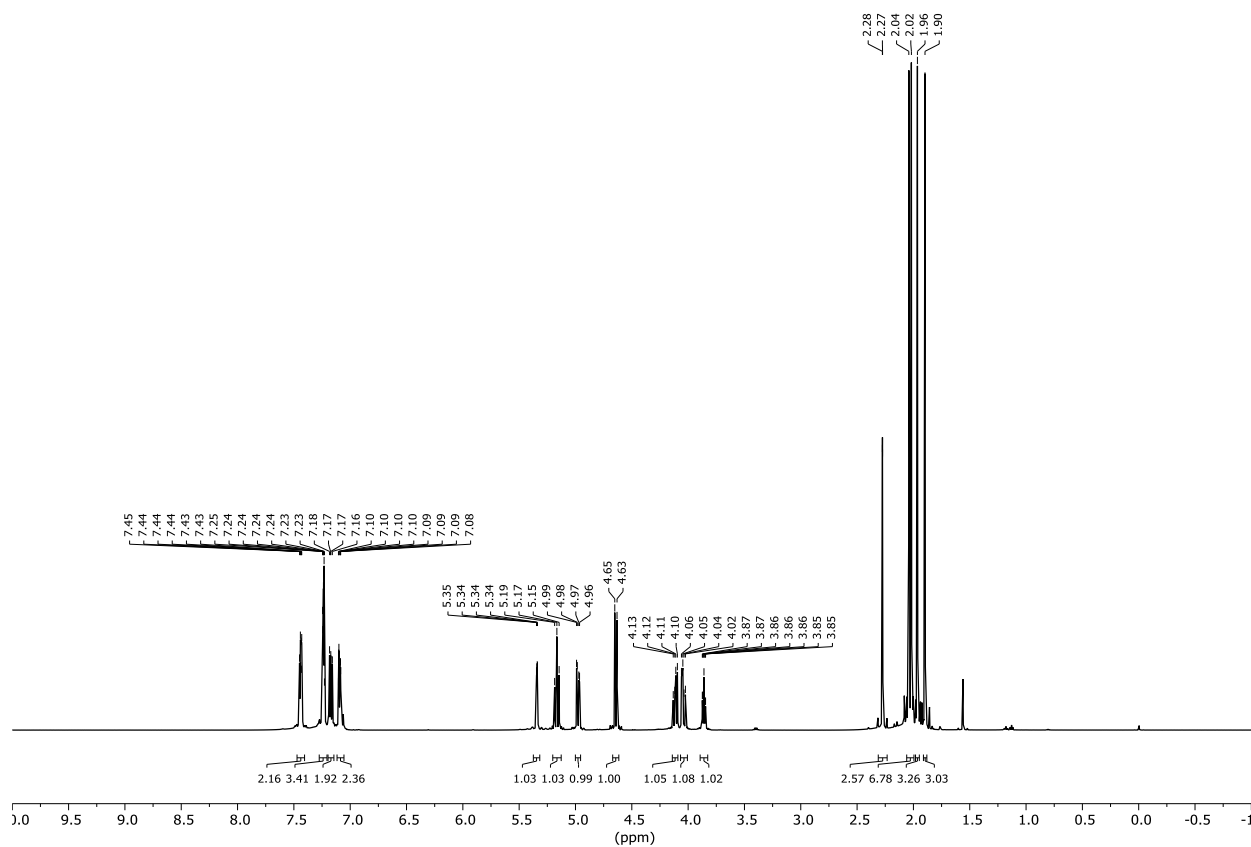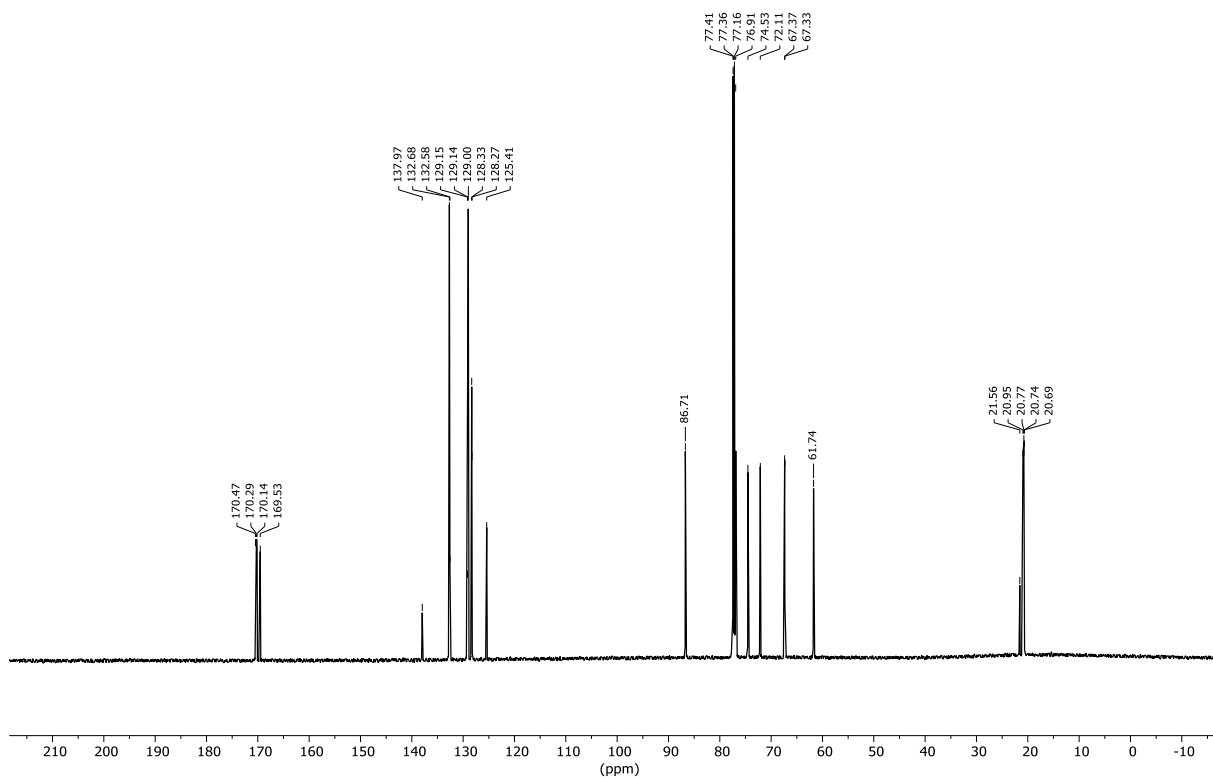

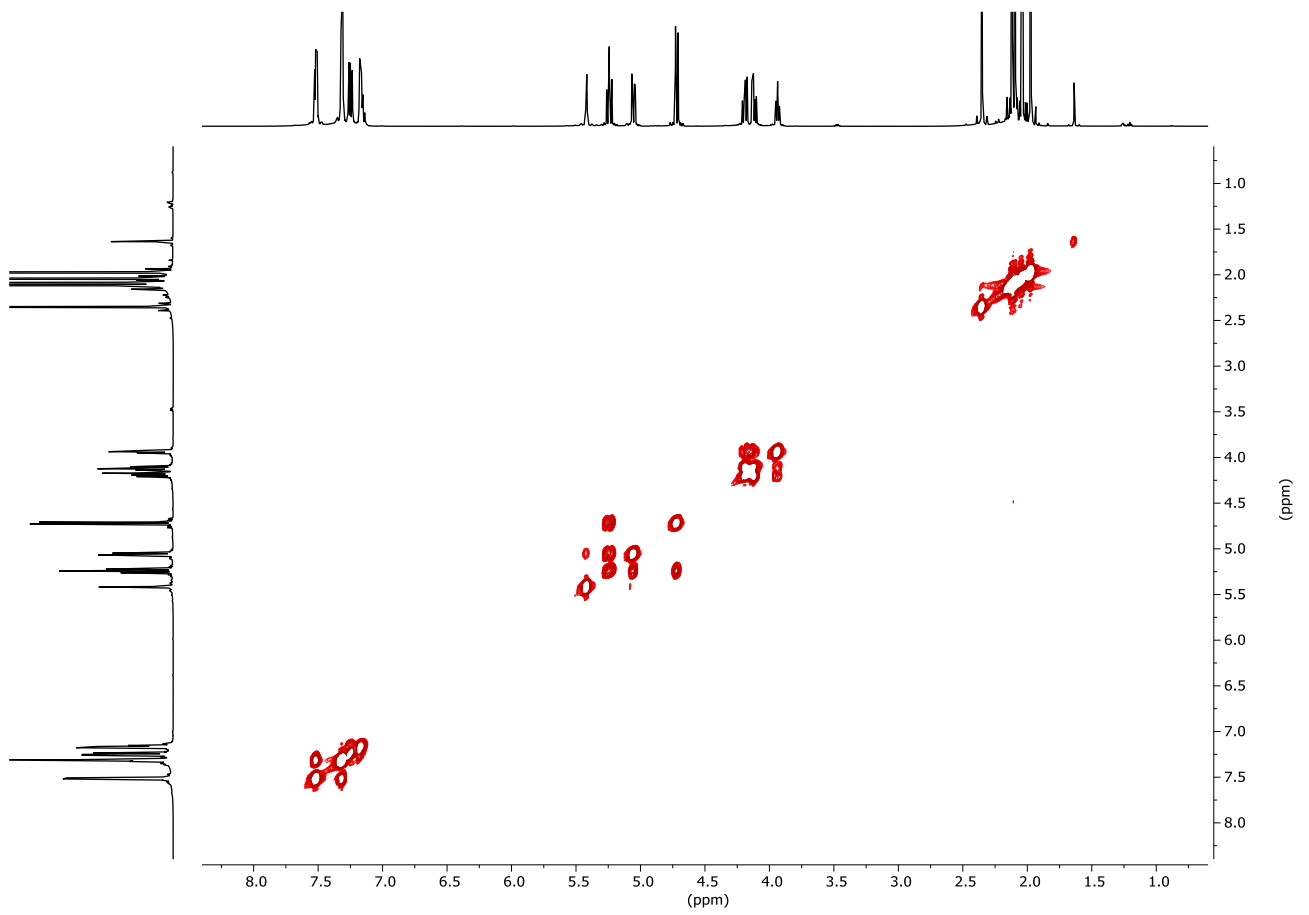



# Compound S3

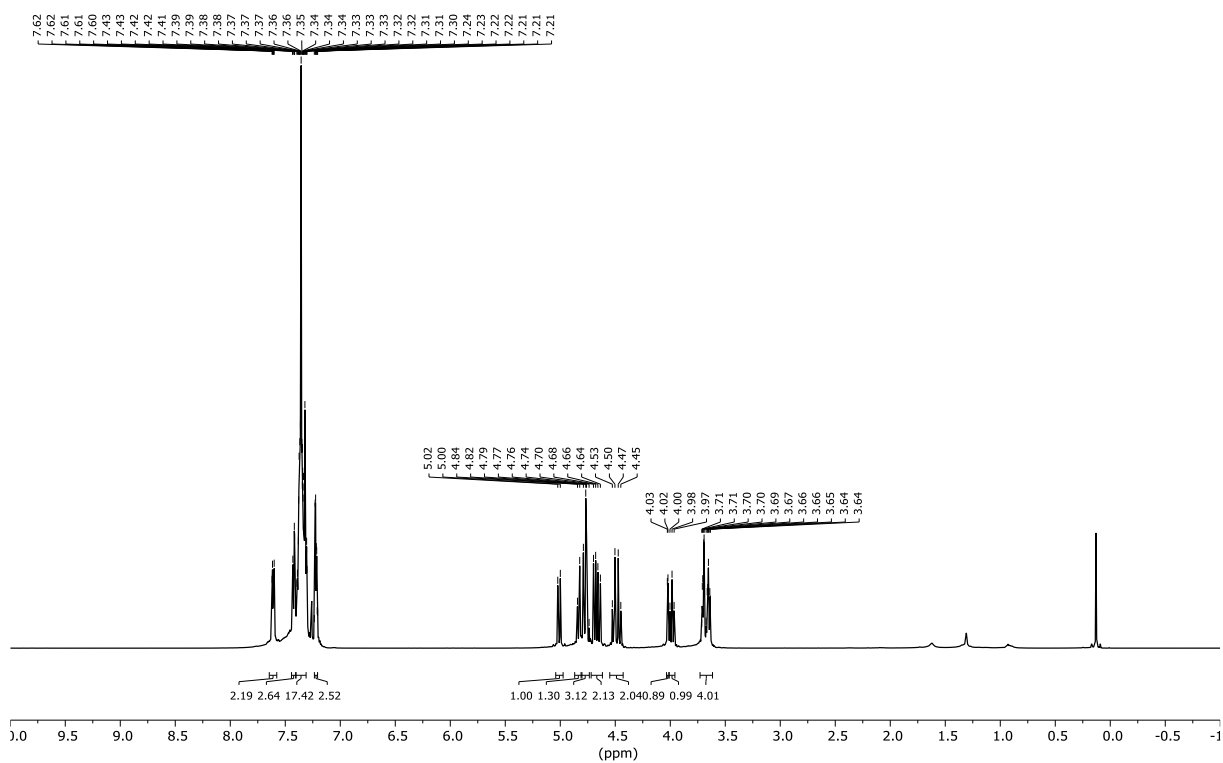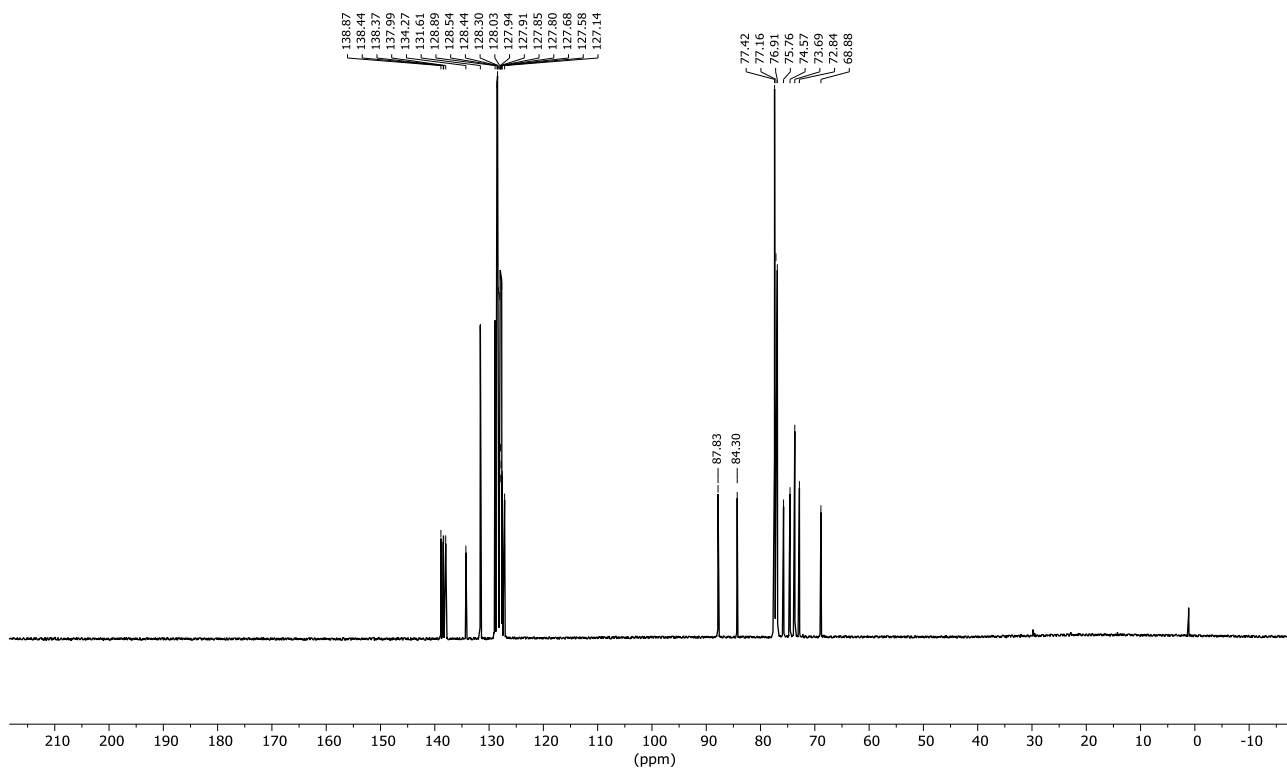

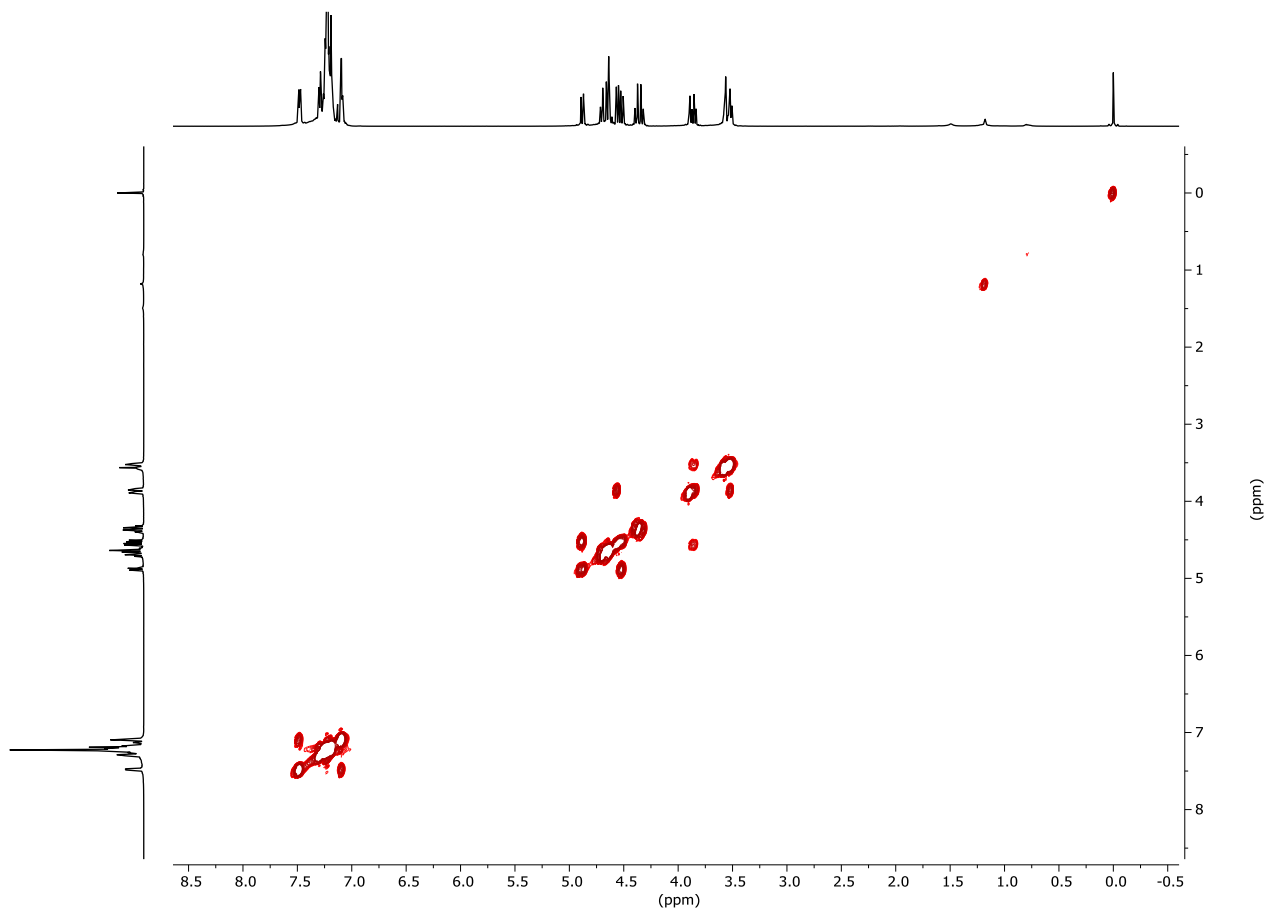

Compound S10

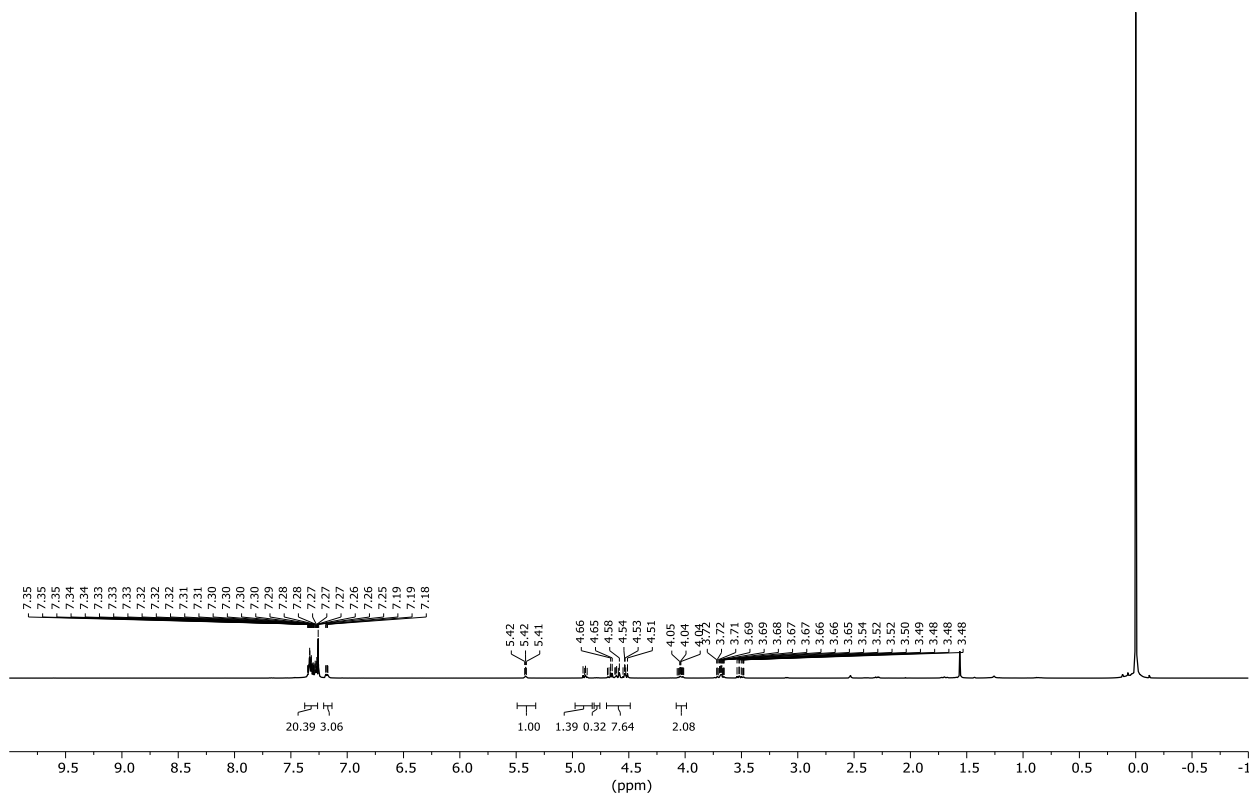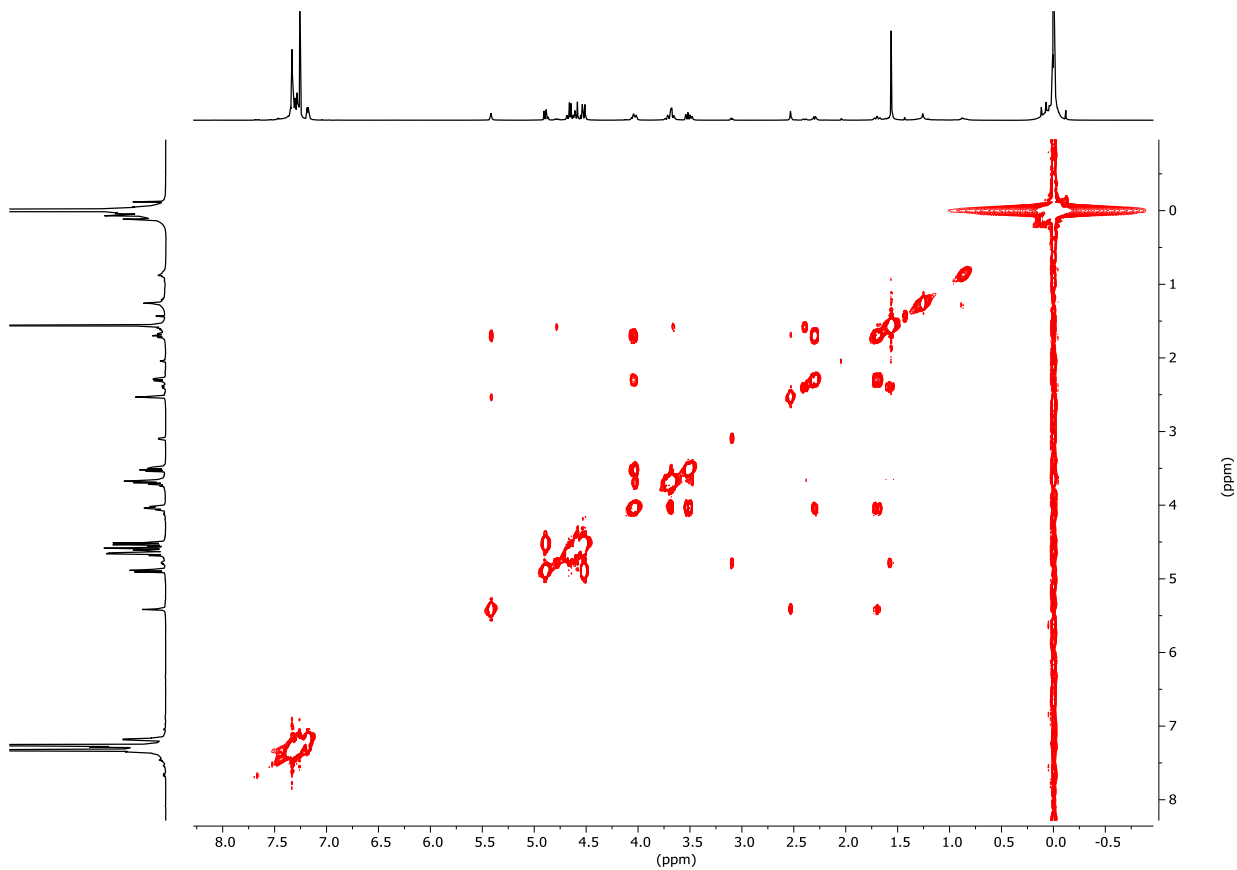

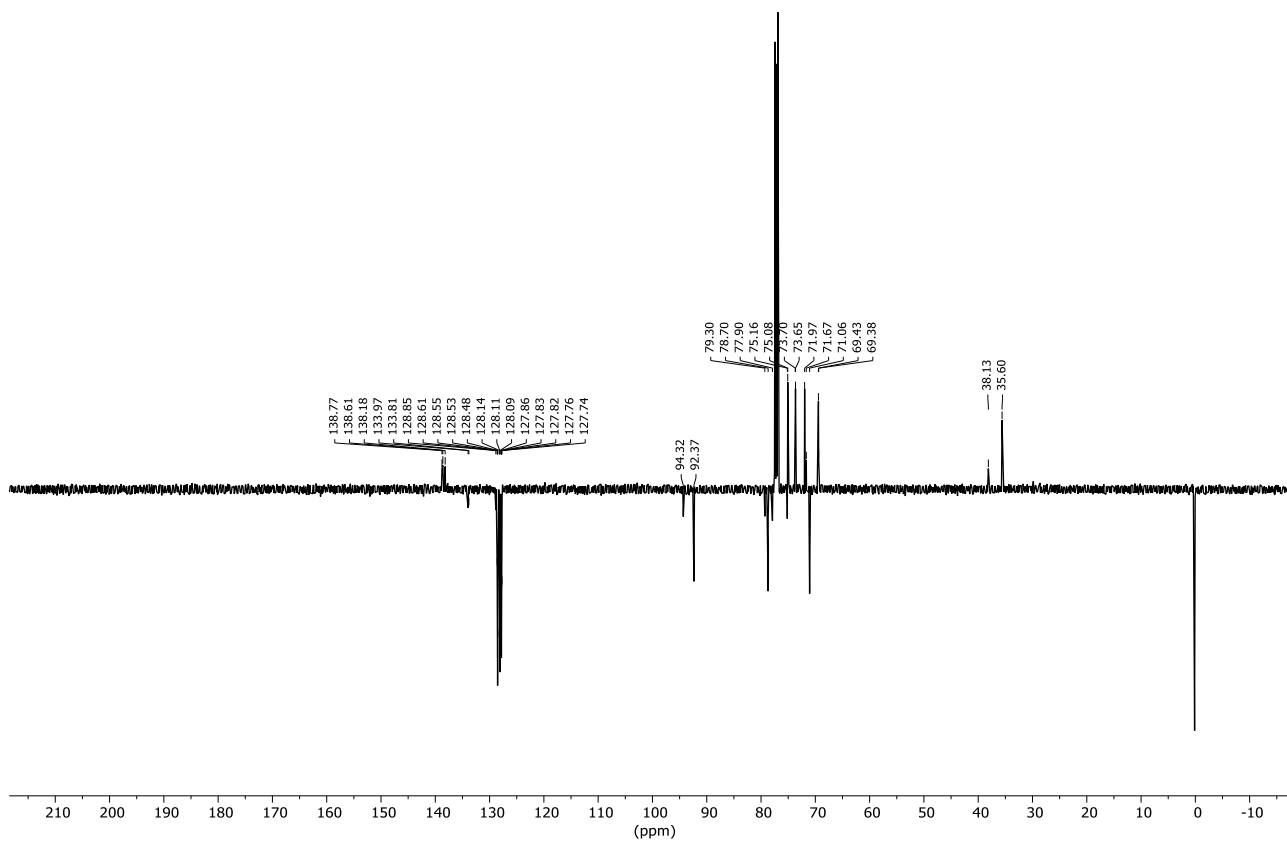

Compound S11

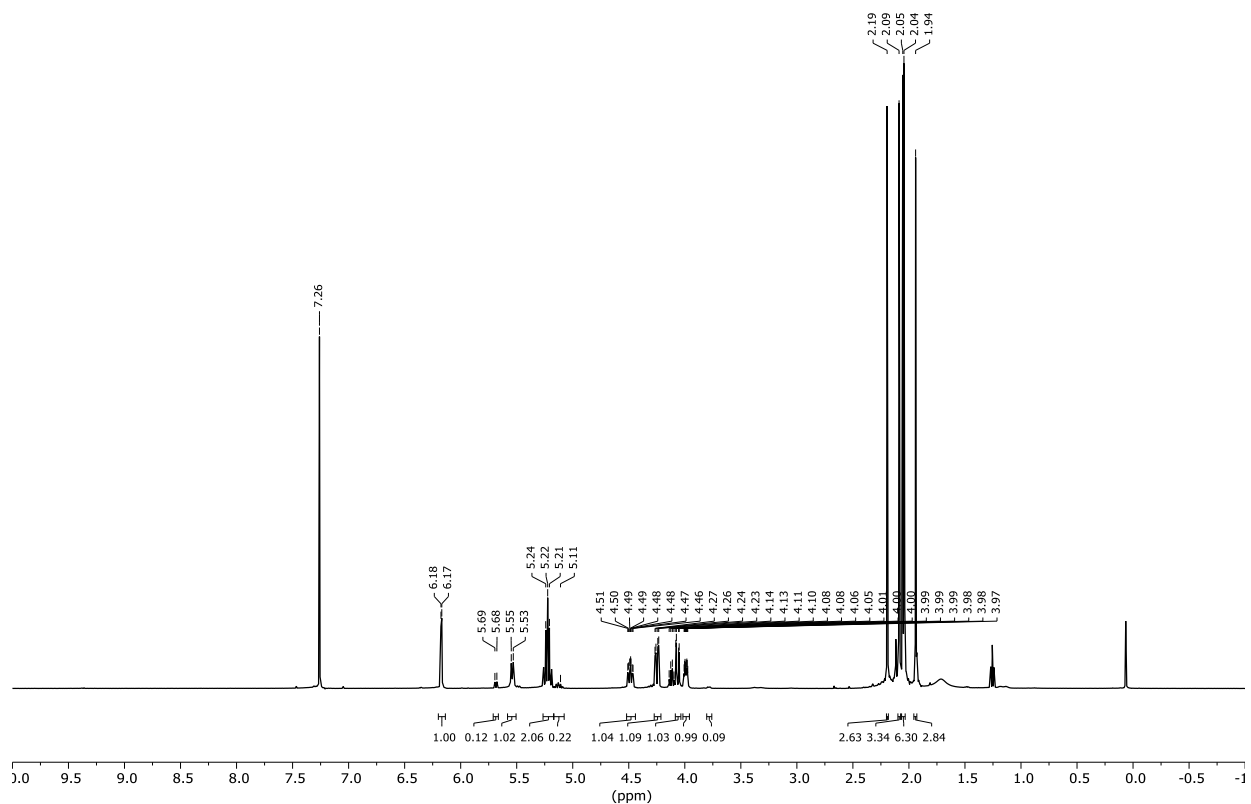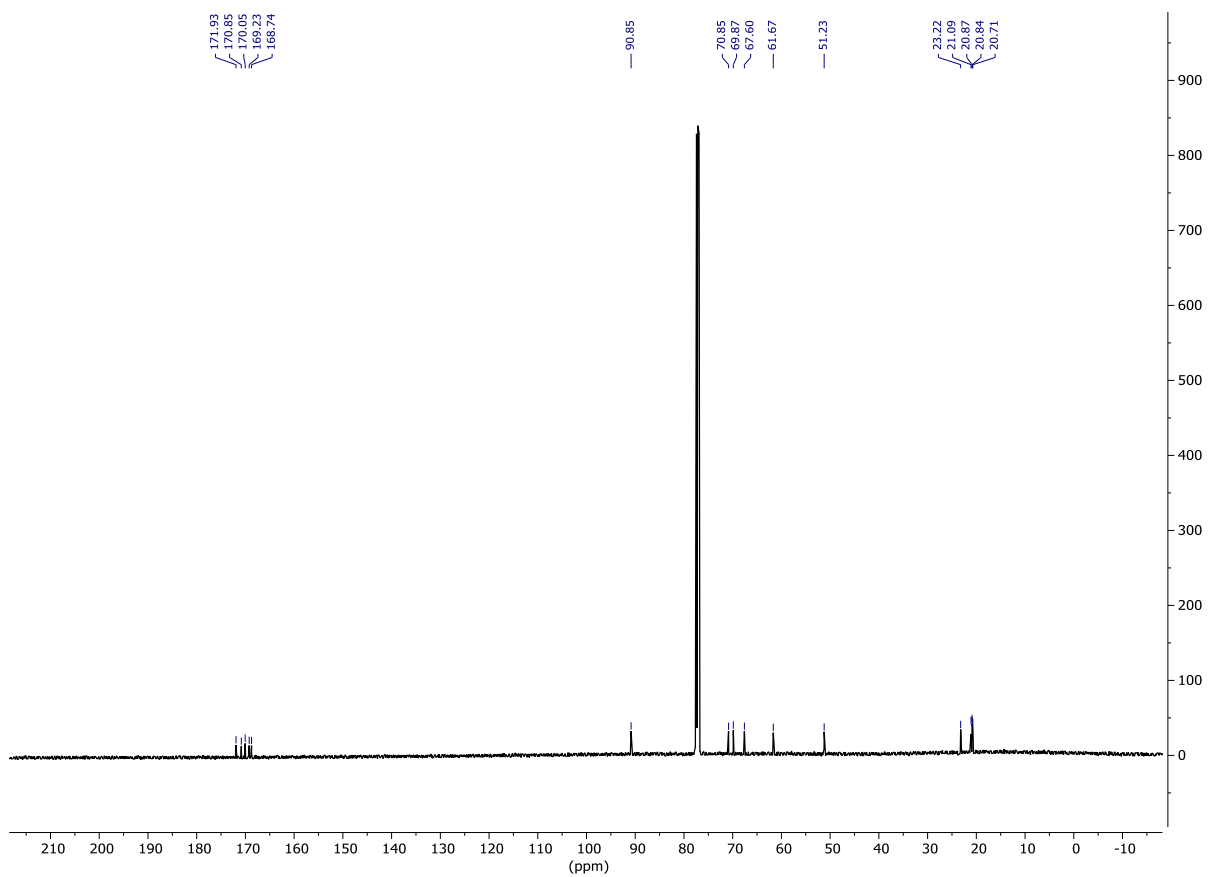

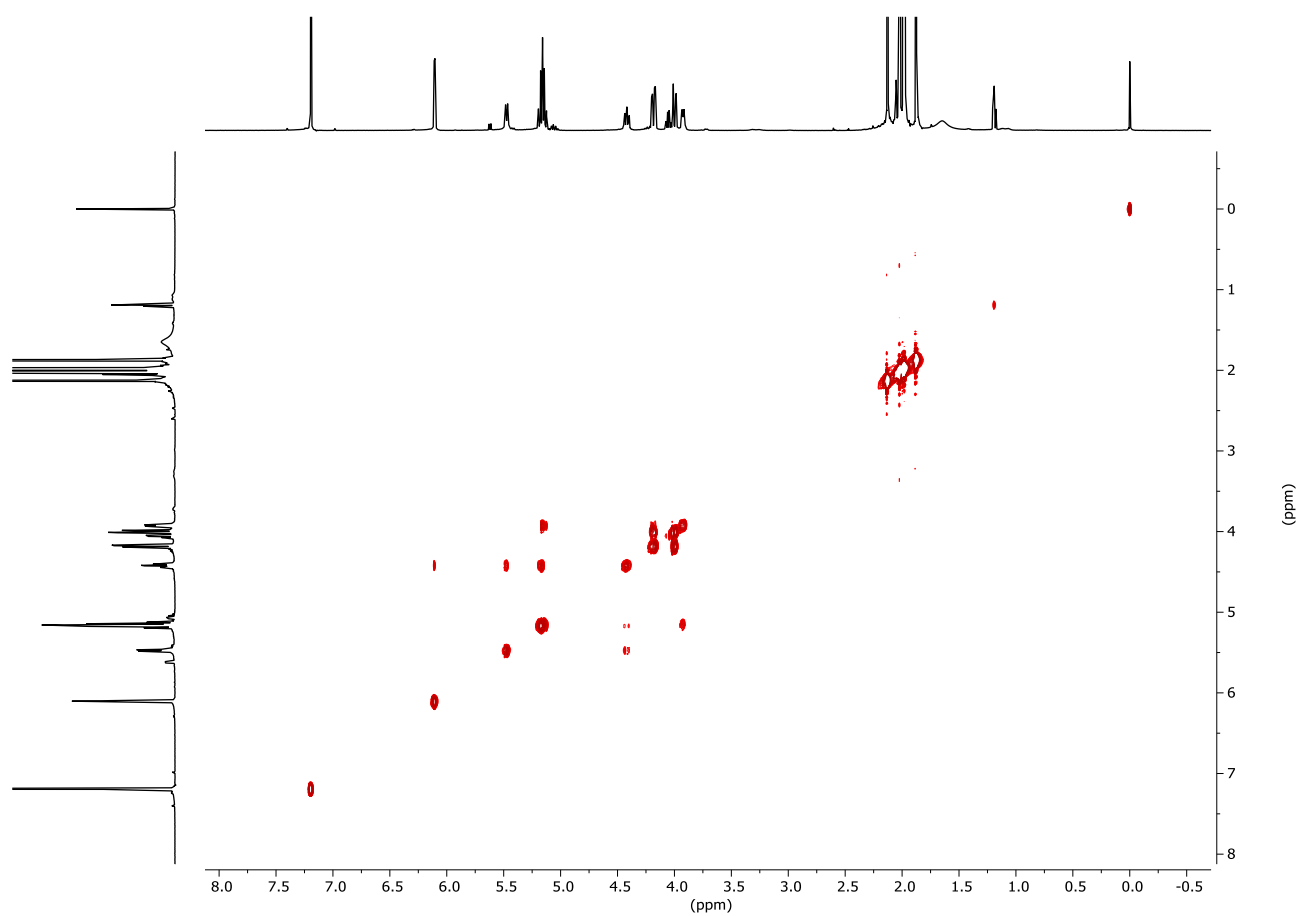

Compound S12

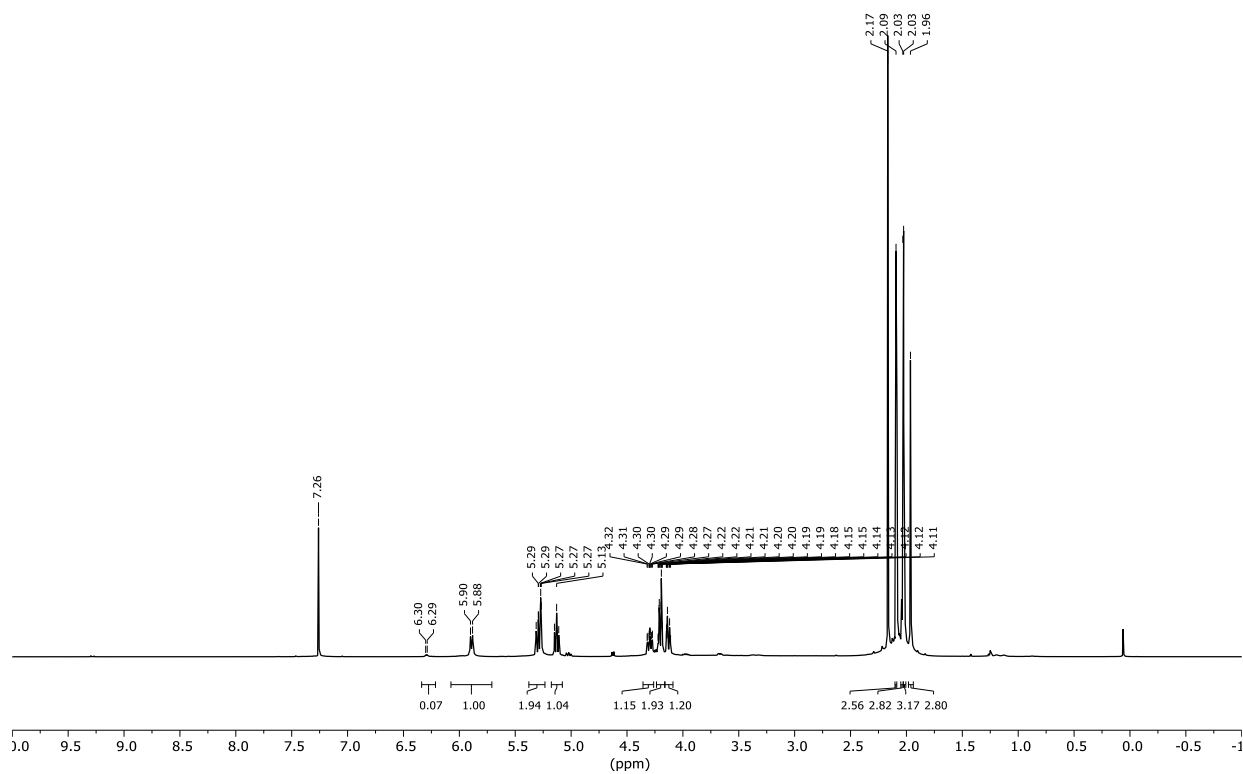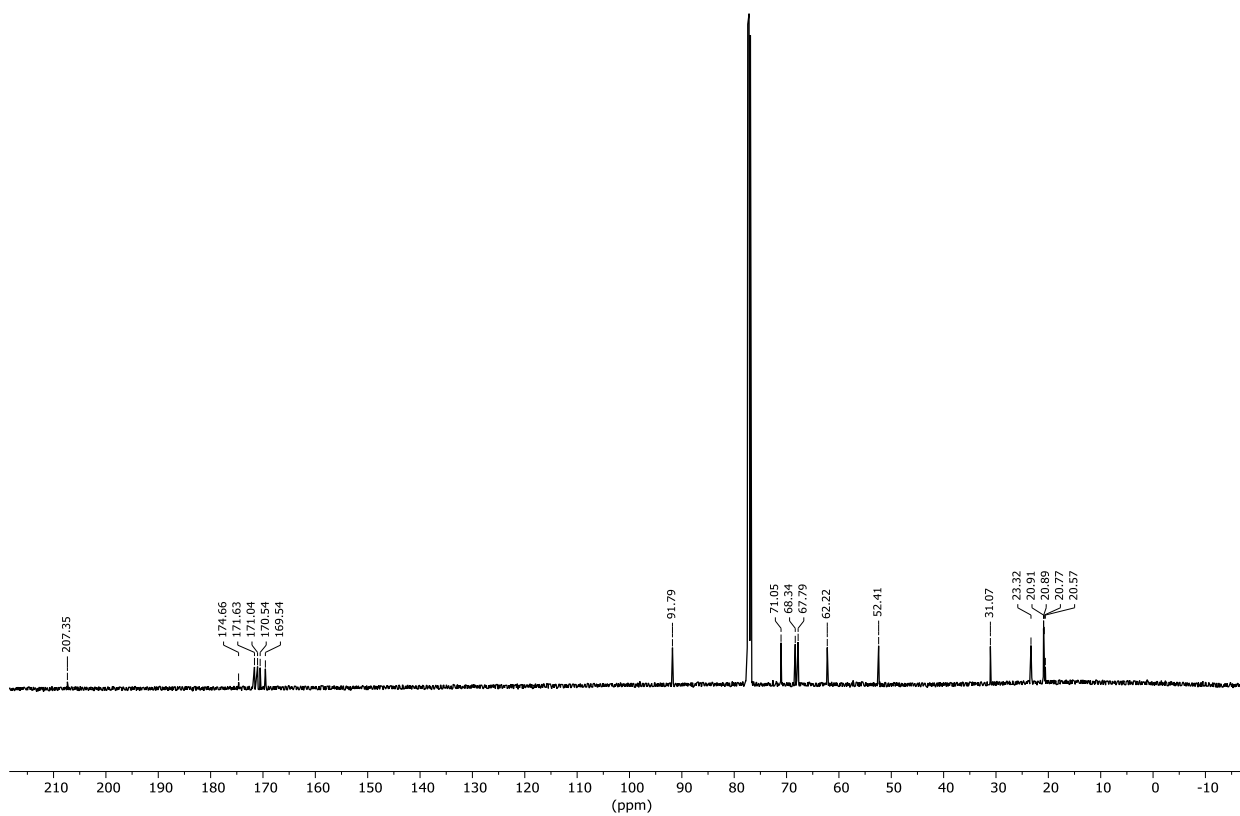

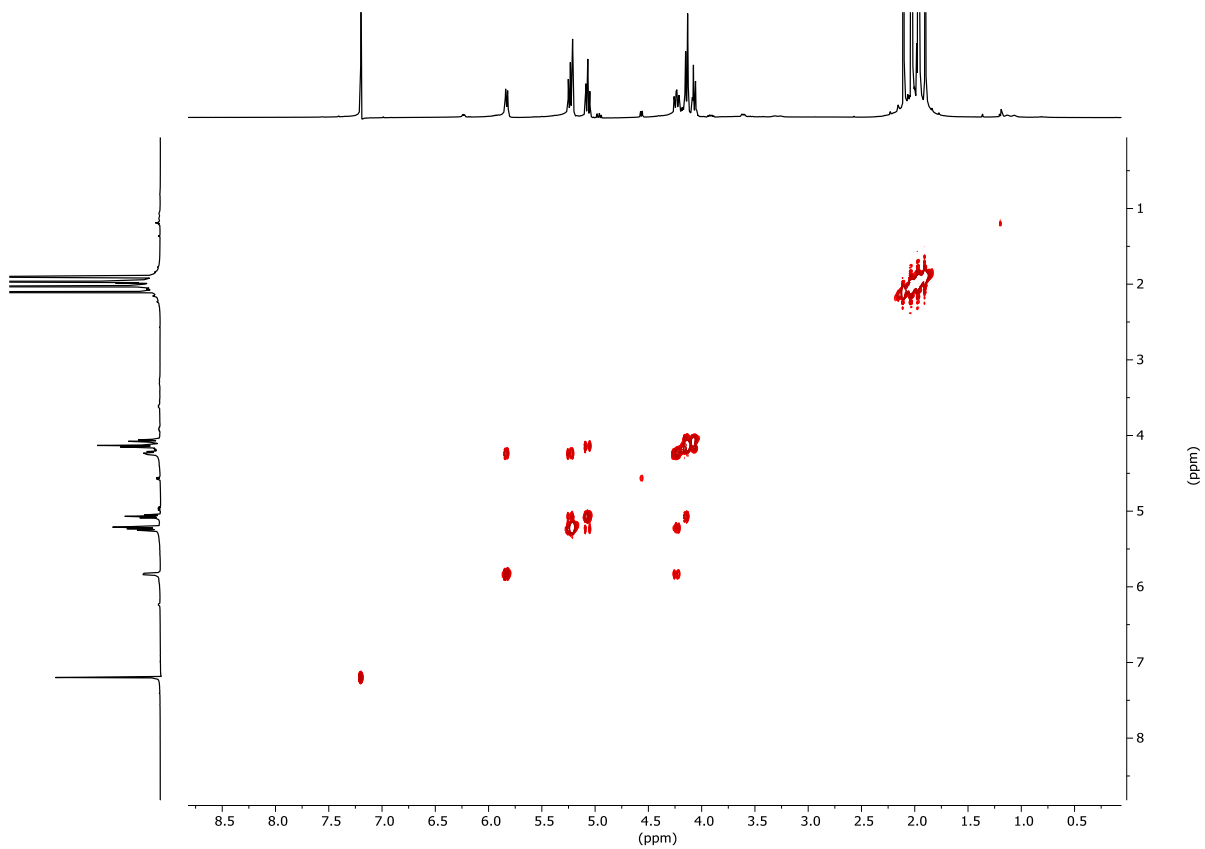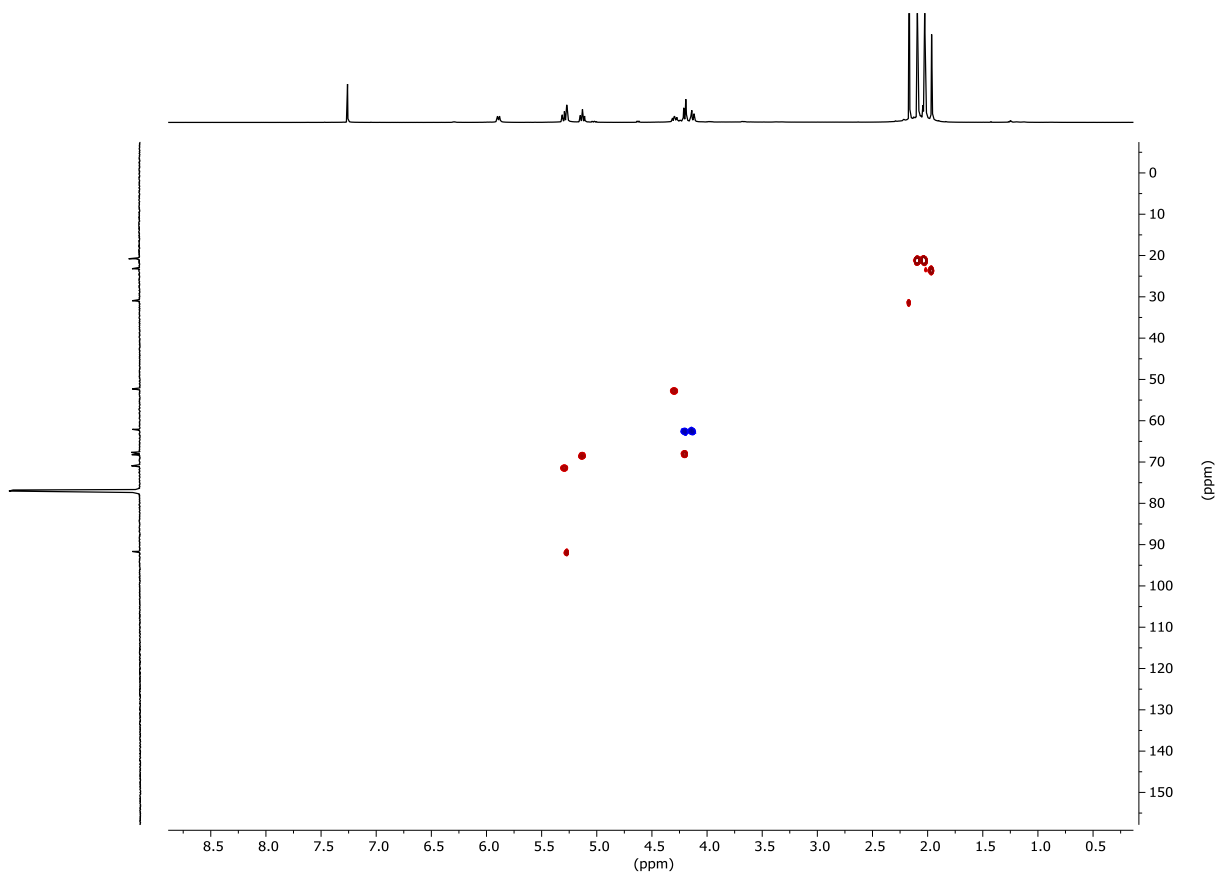



Compound S13

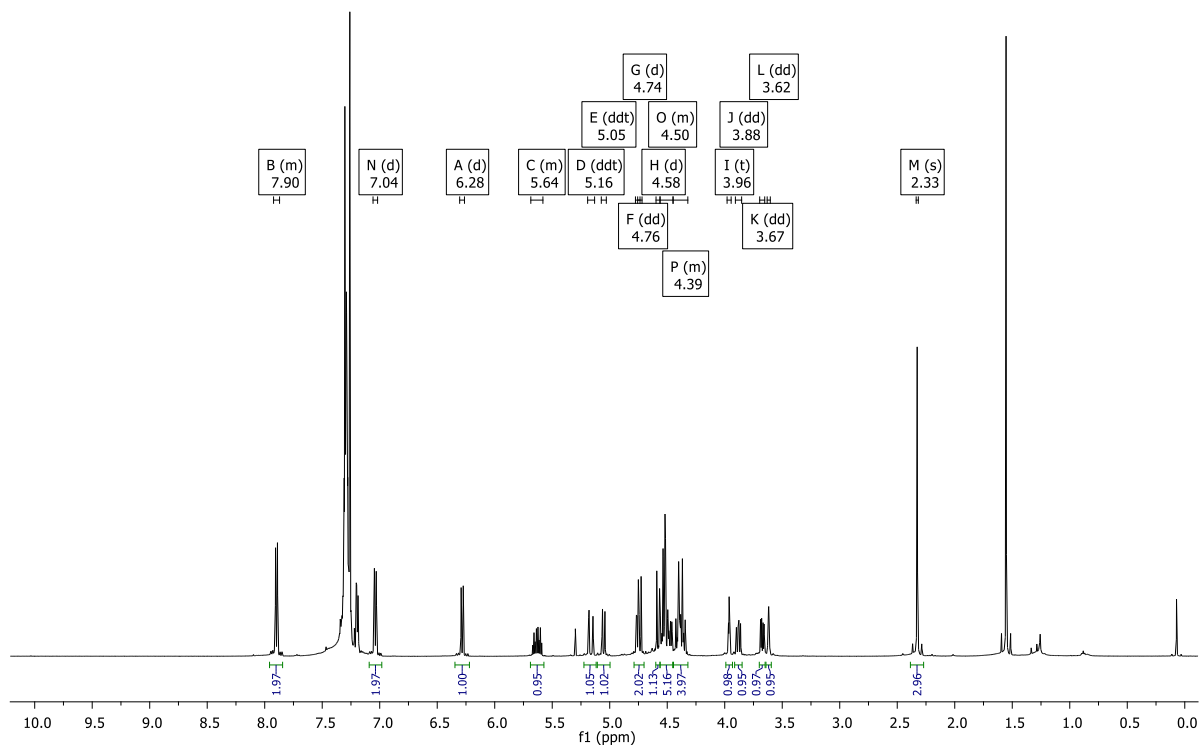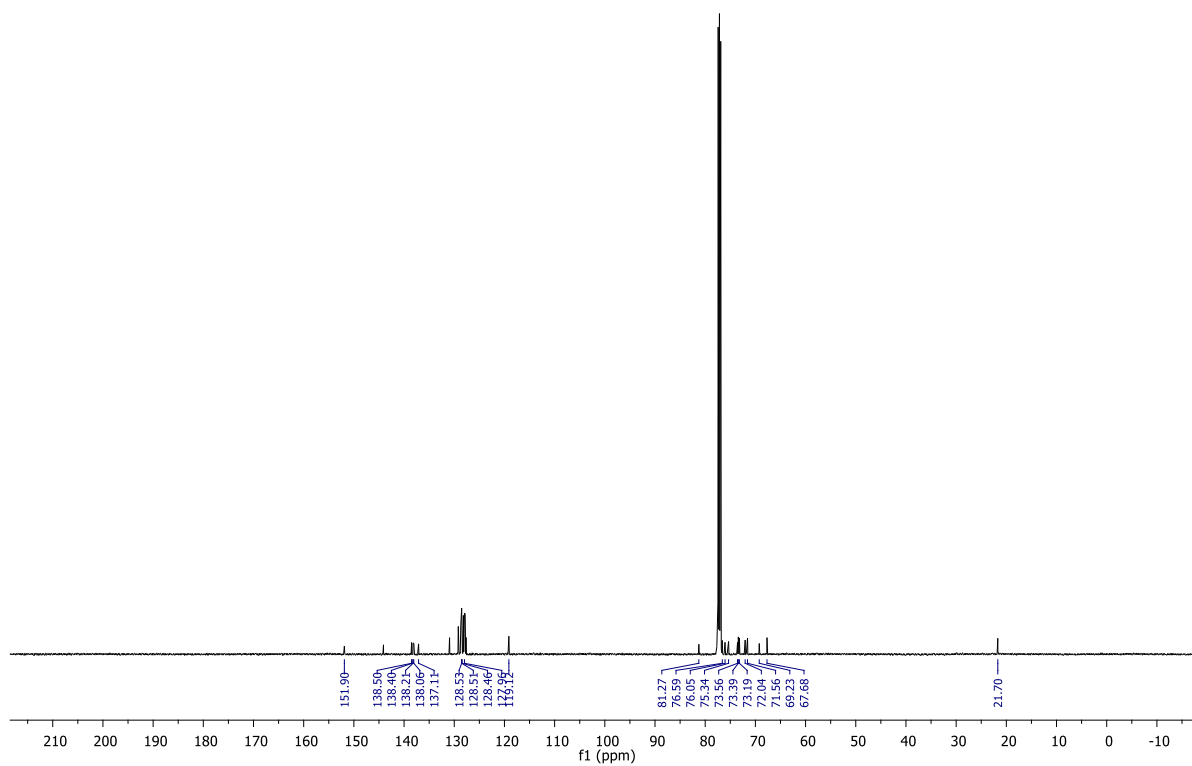

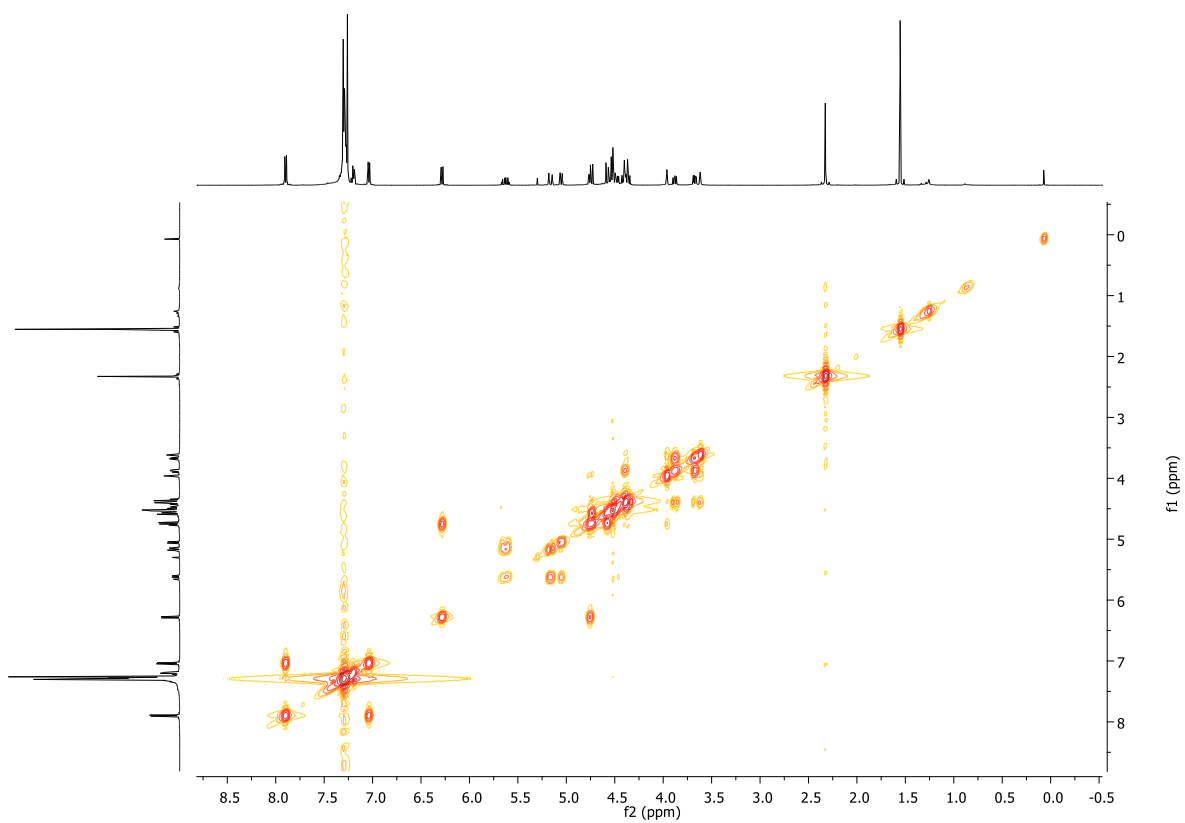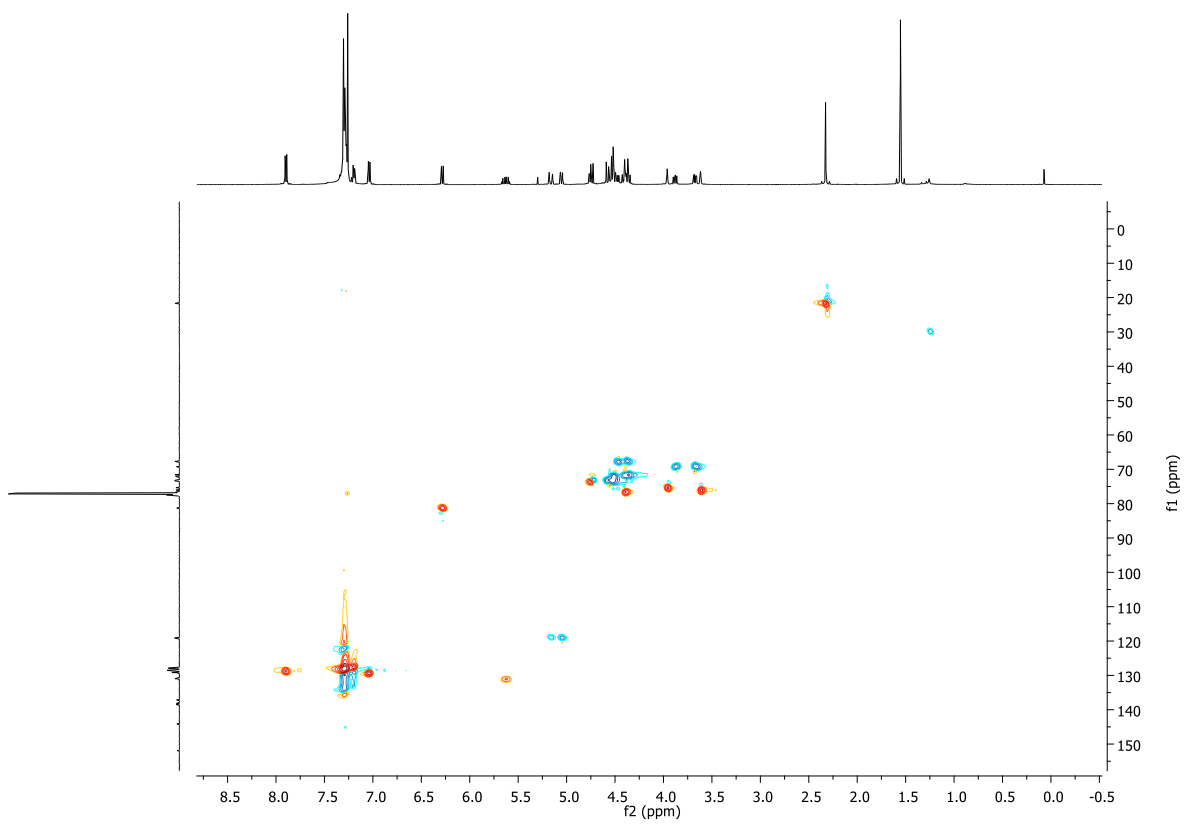

Compound S14

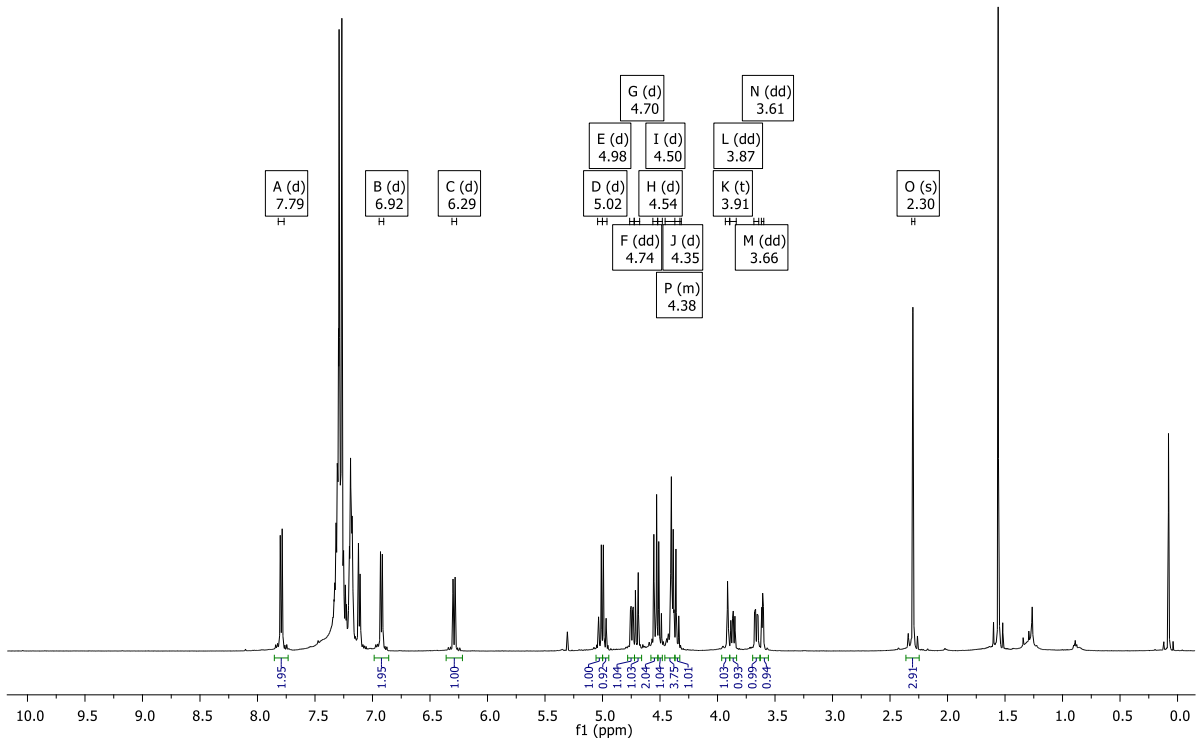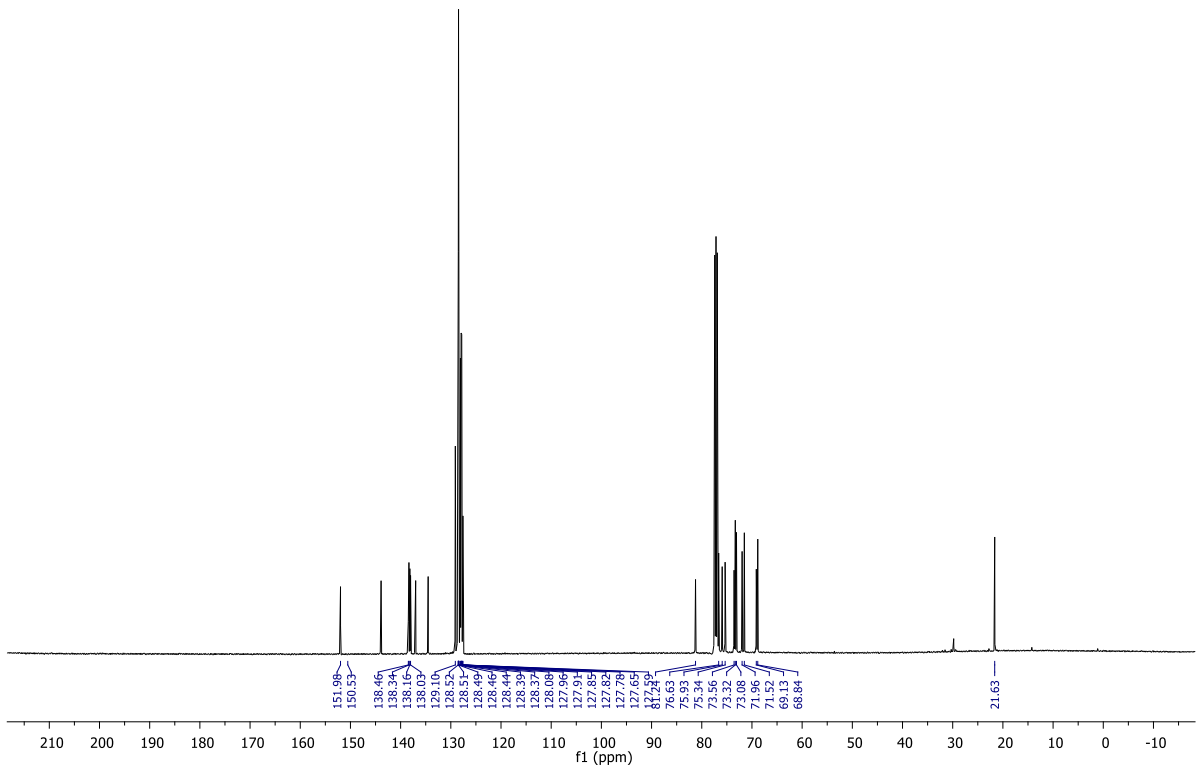

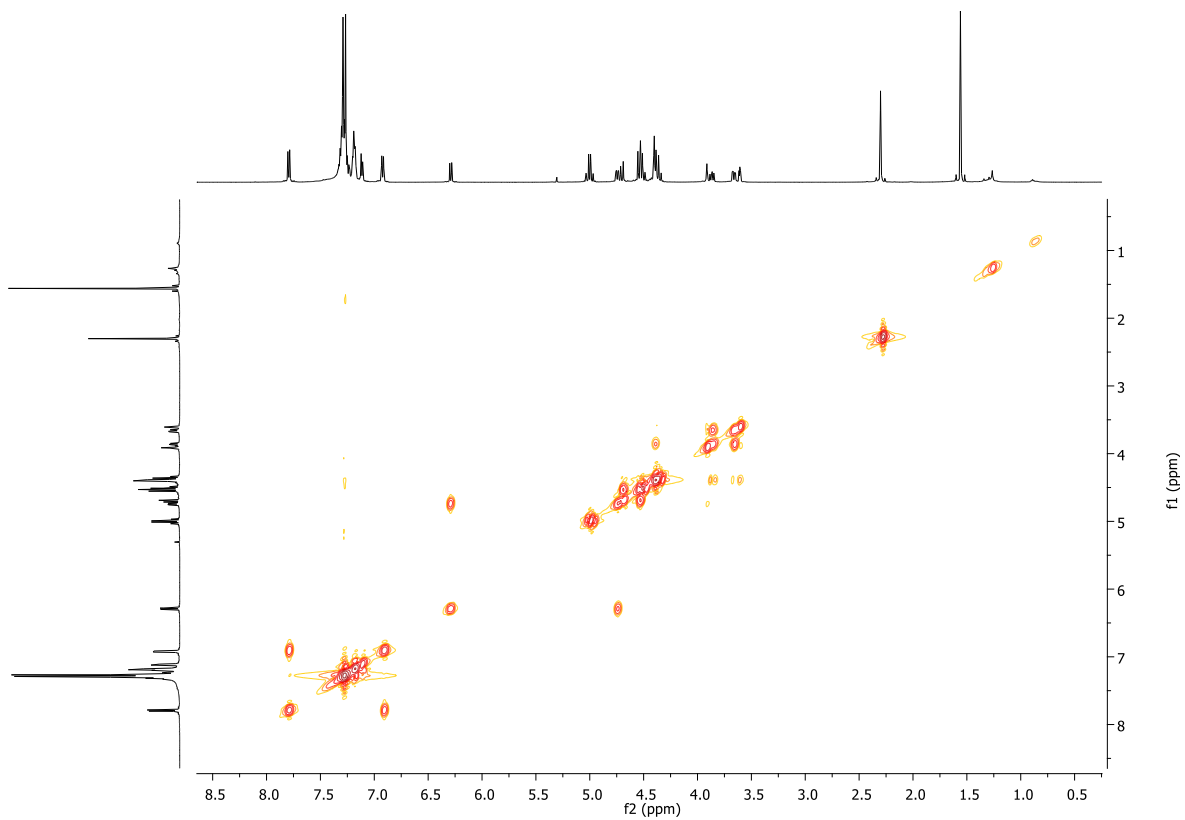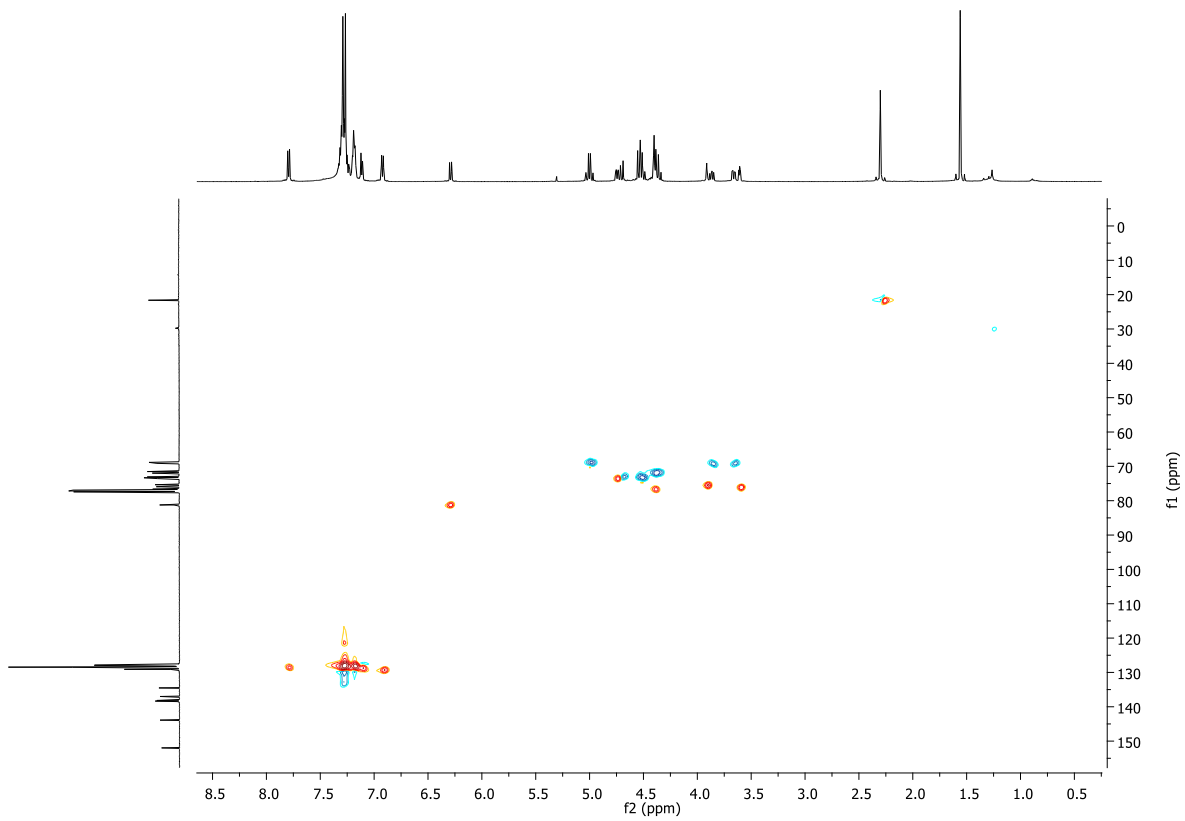

Compound S15

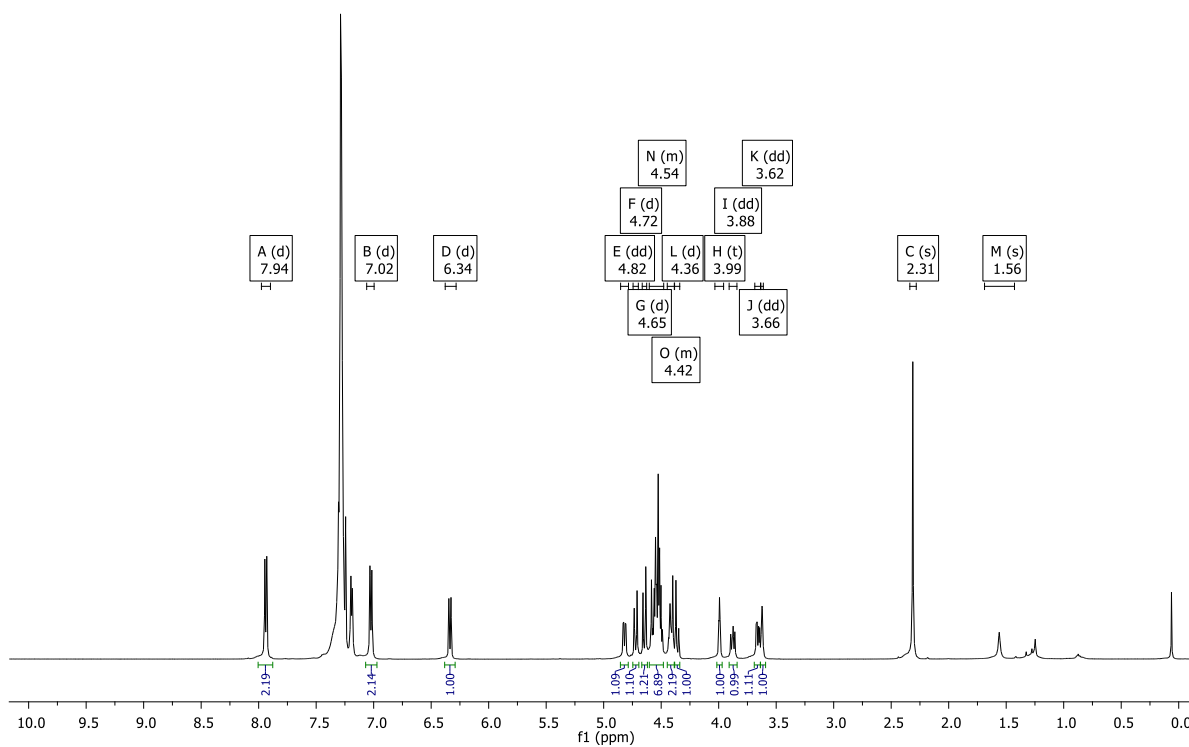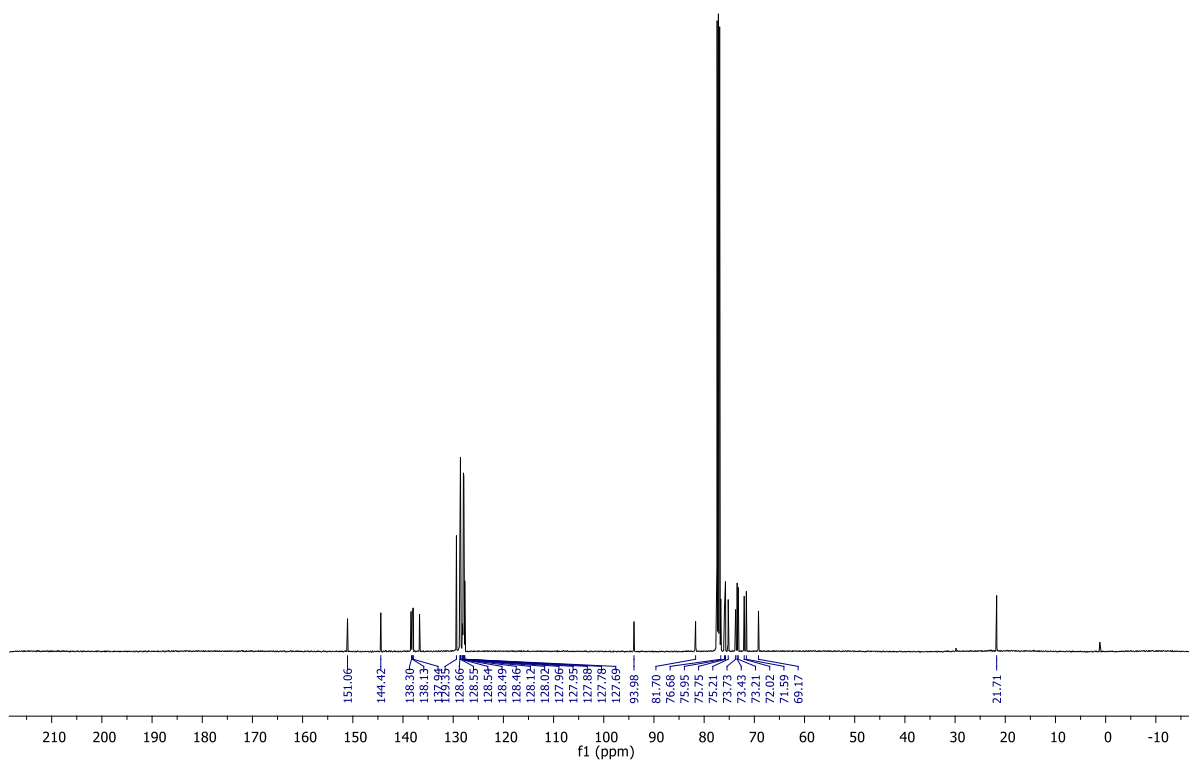

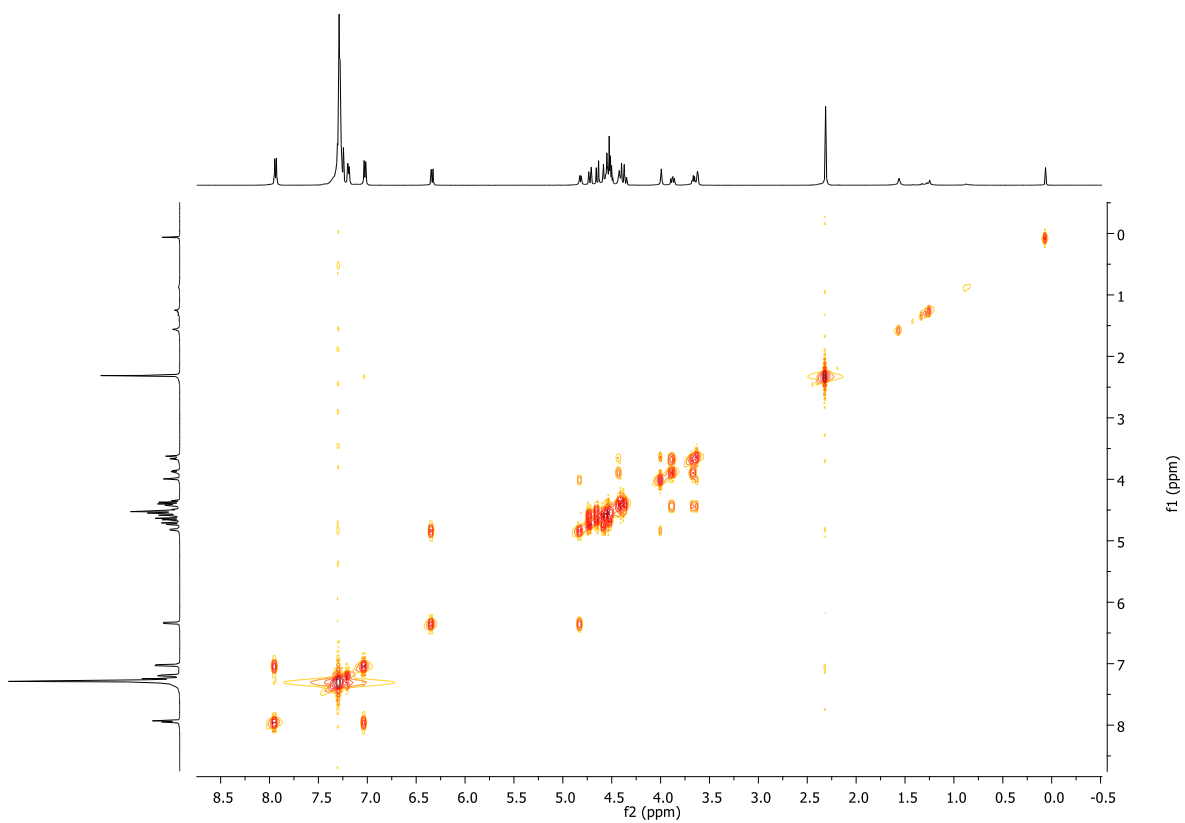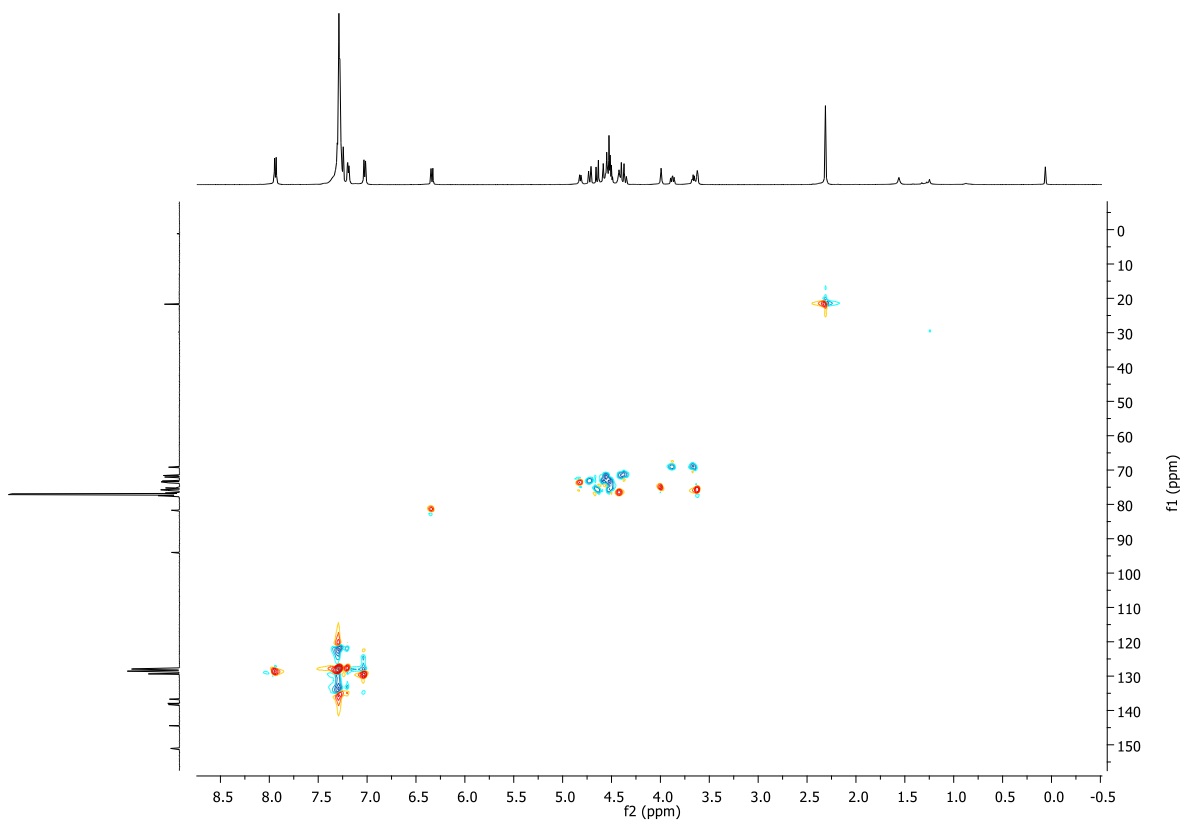

Compound S16 $\alpha$

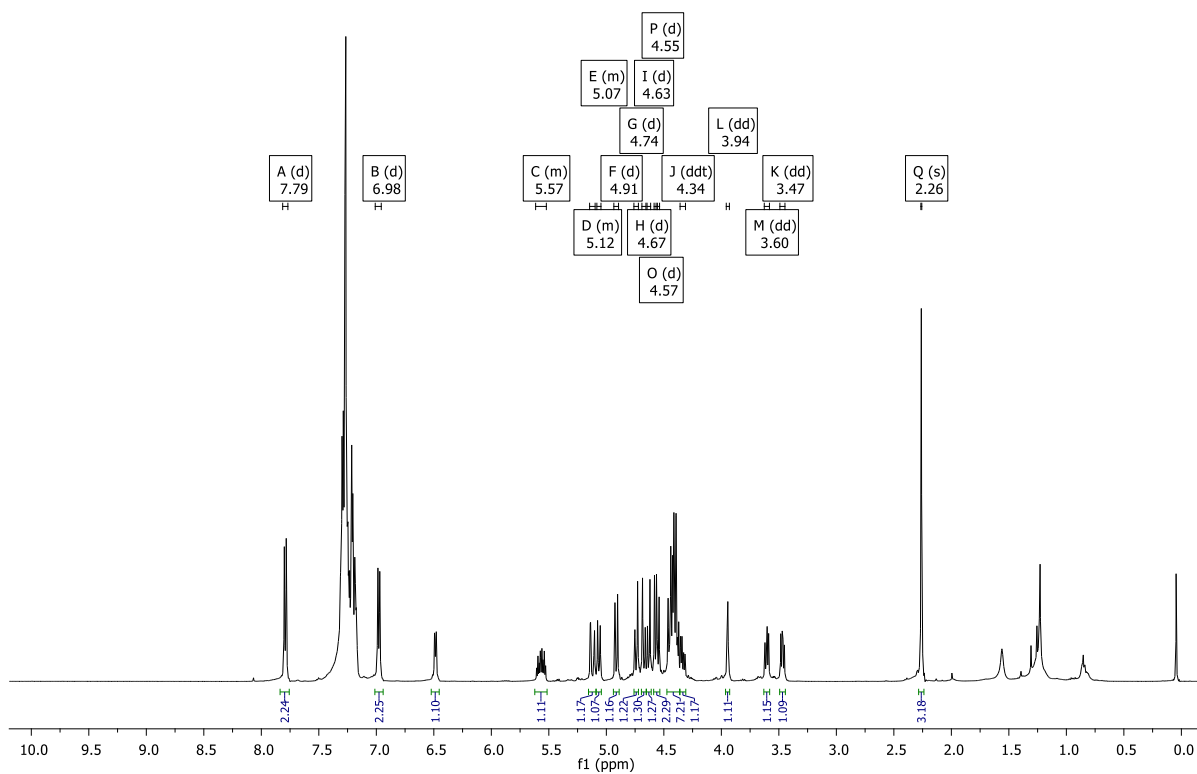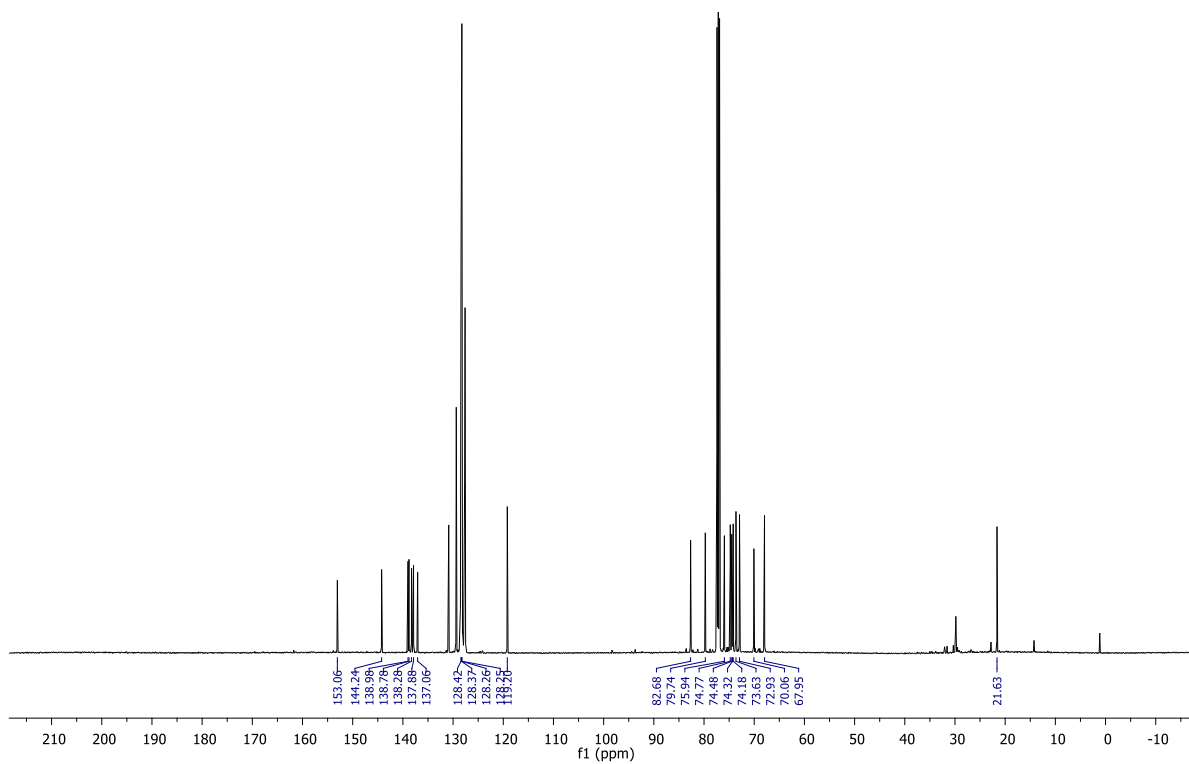

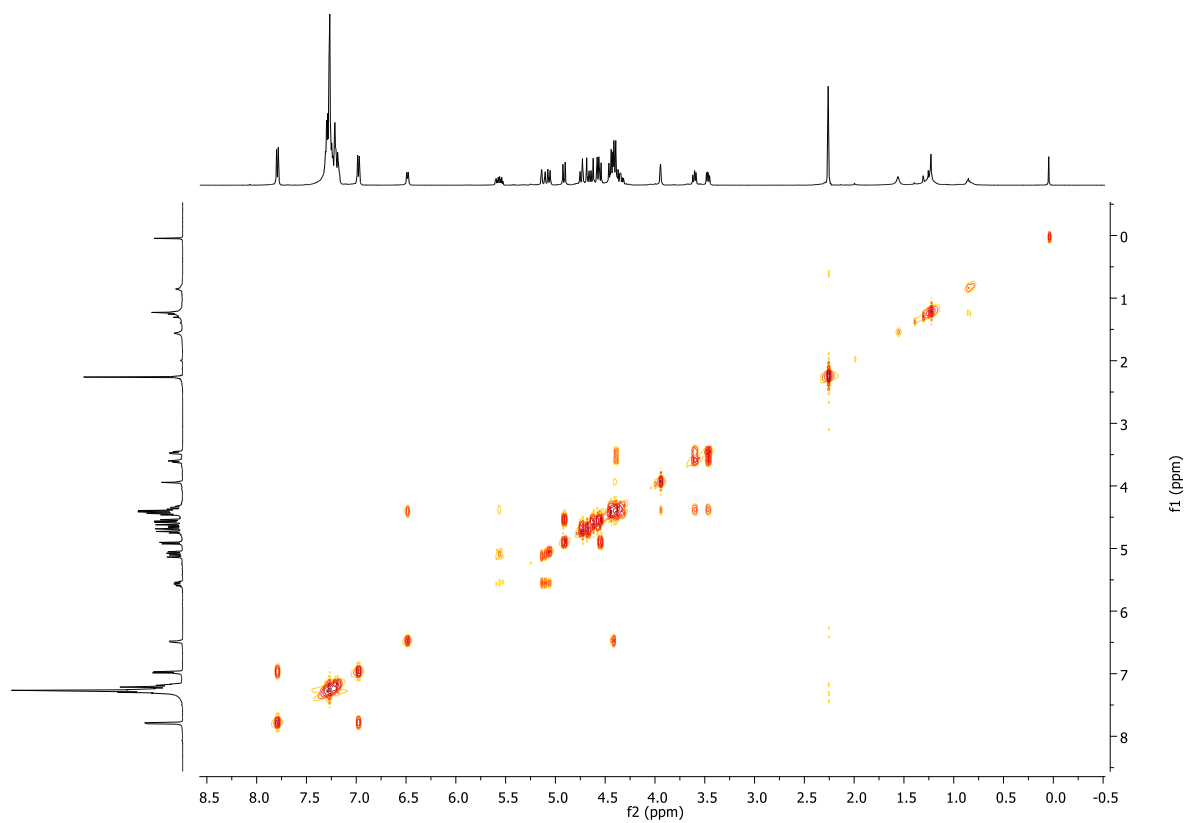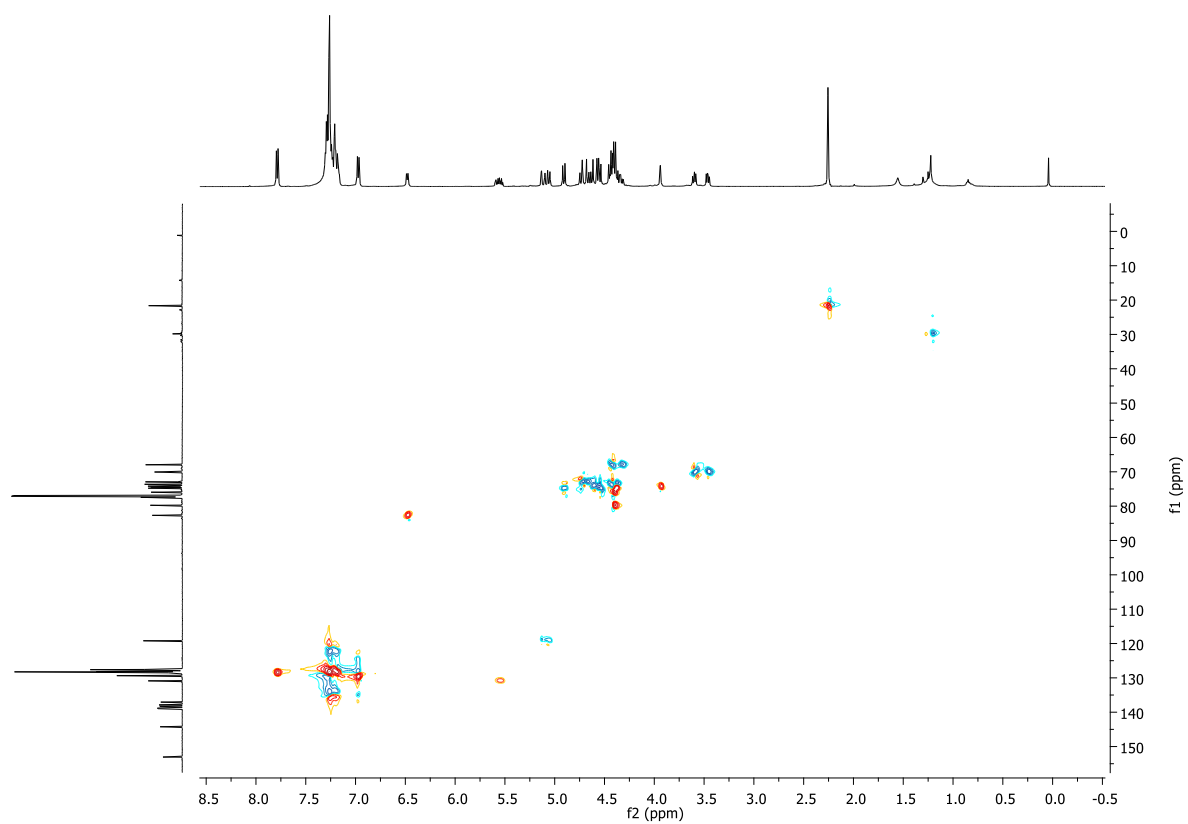



Compound S16 $\beta$

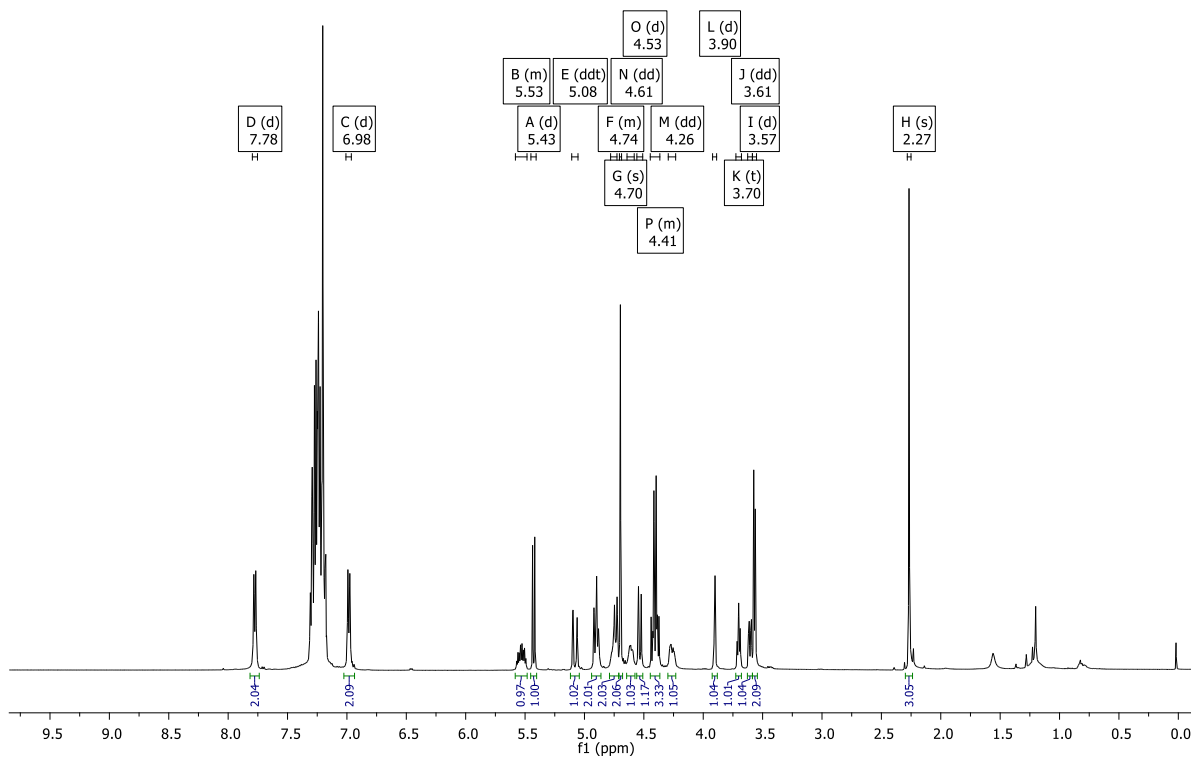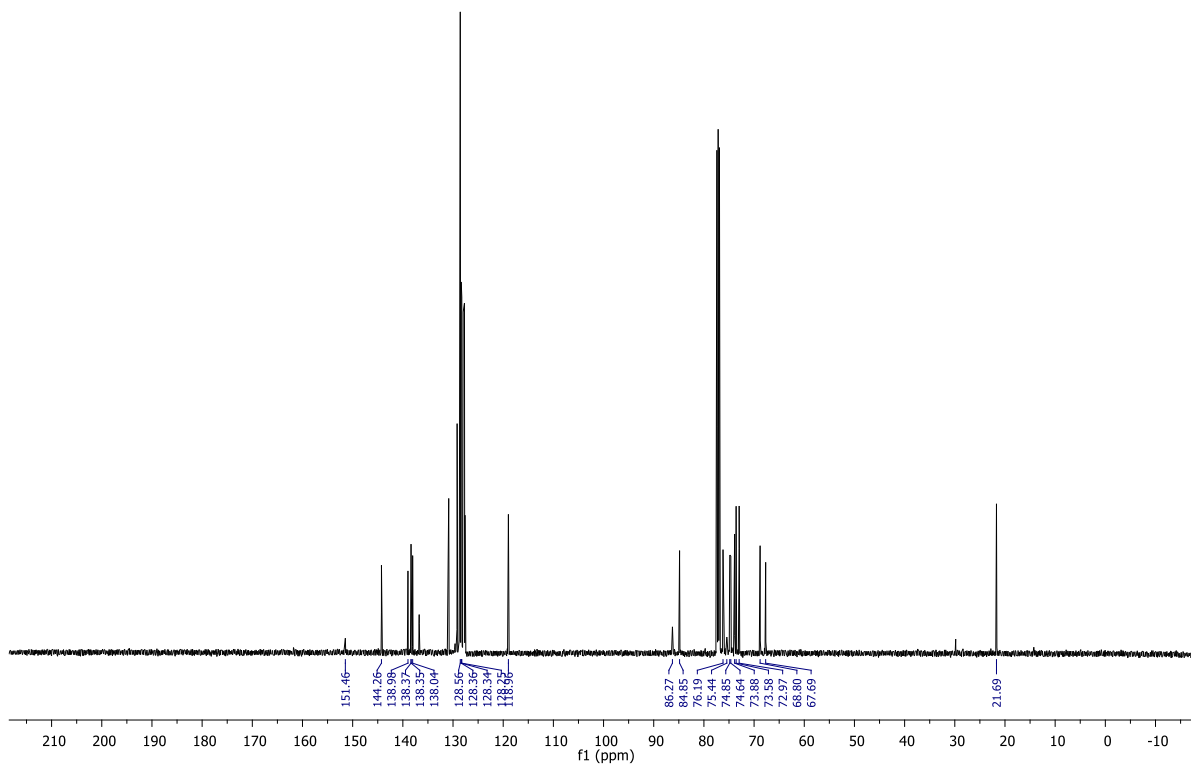

Compound S17 $\alpha$

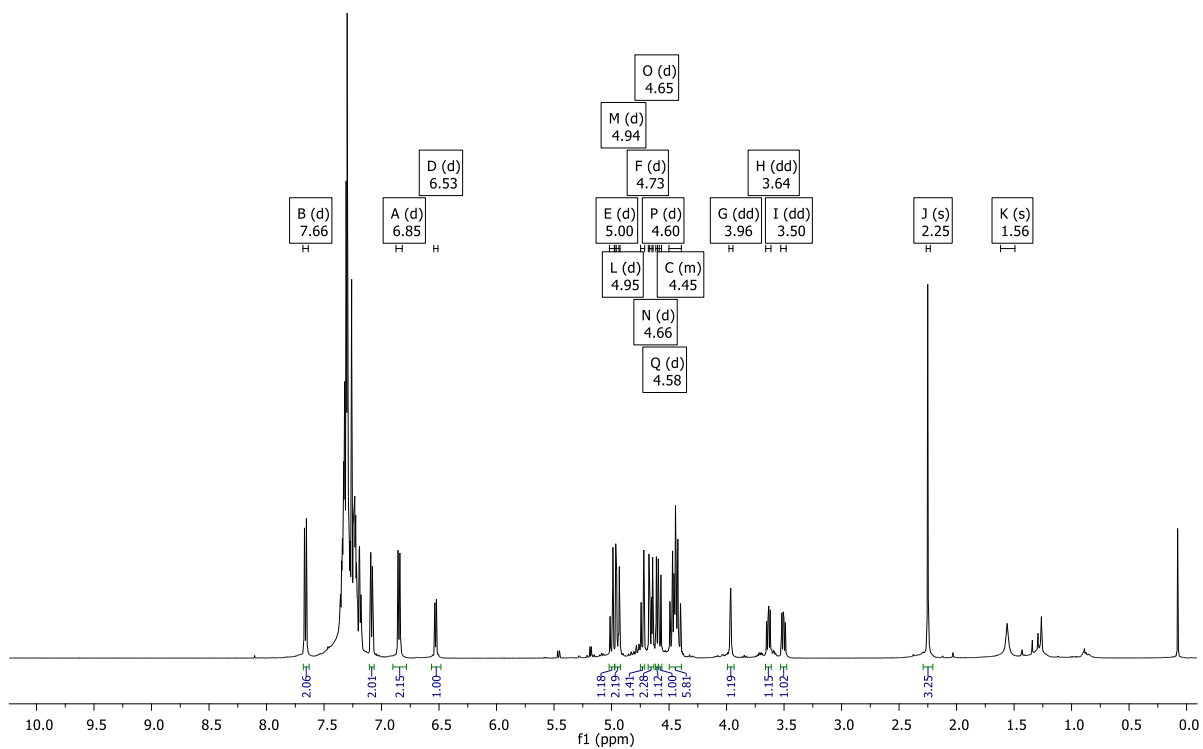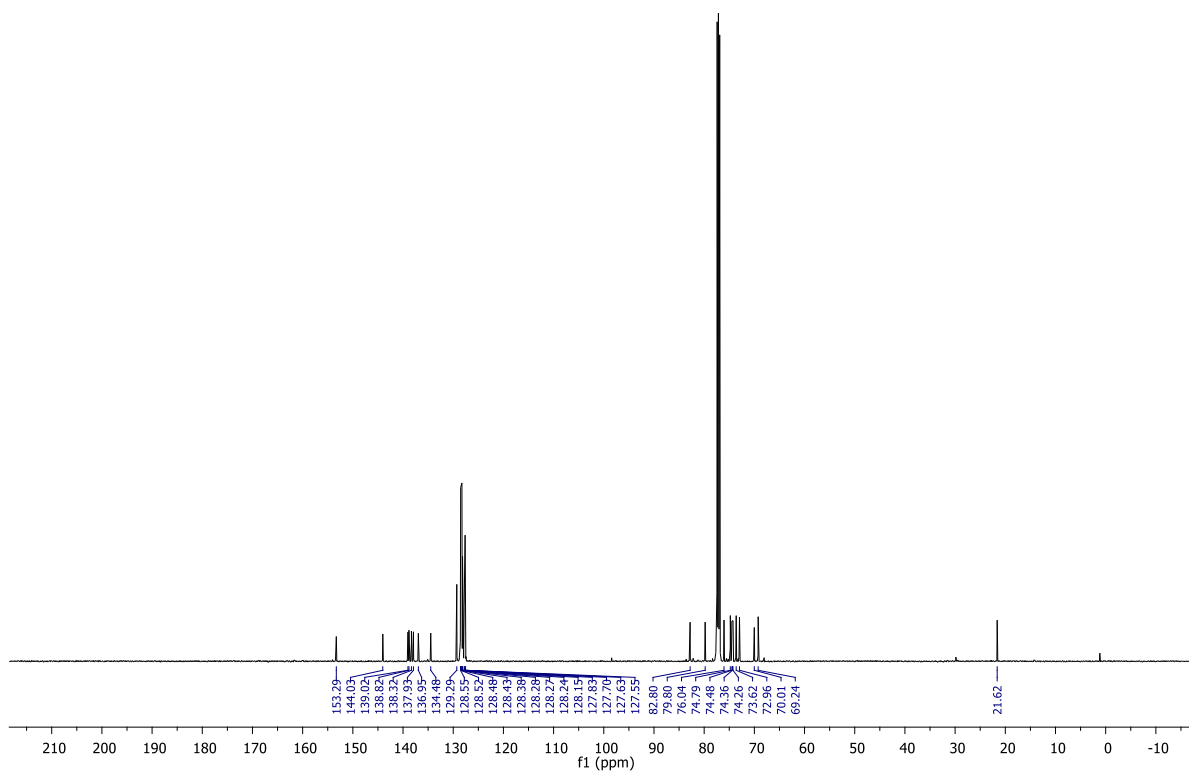

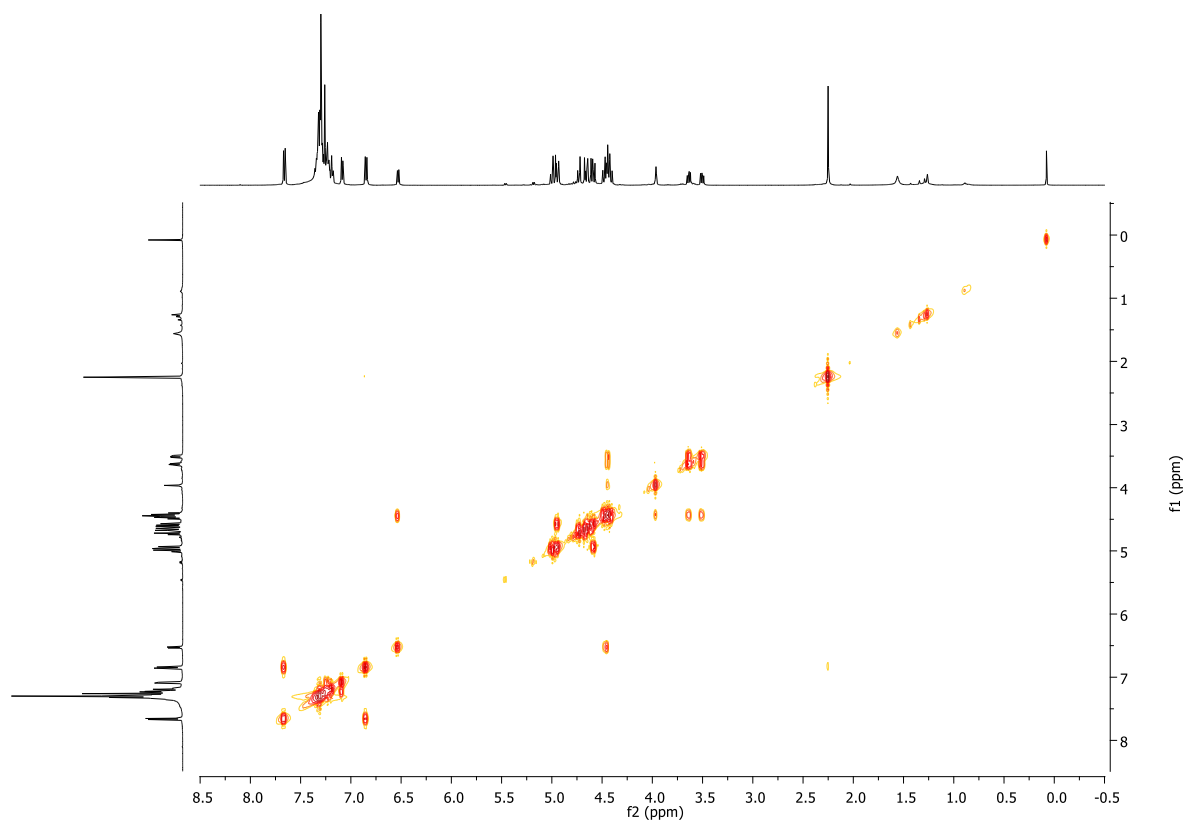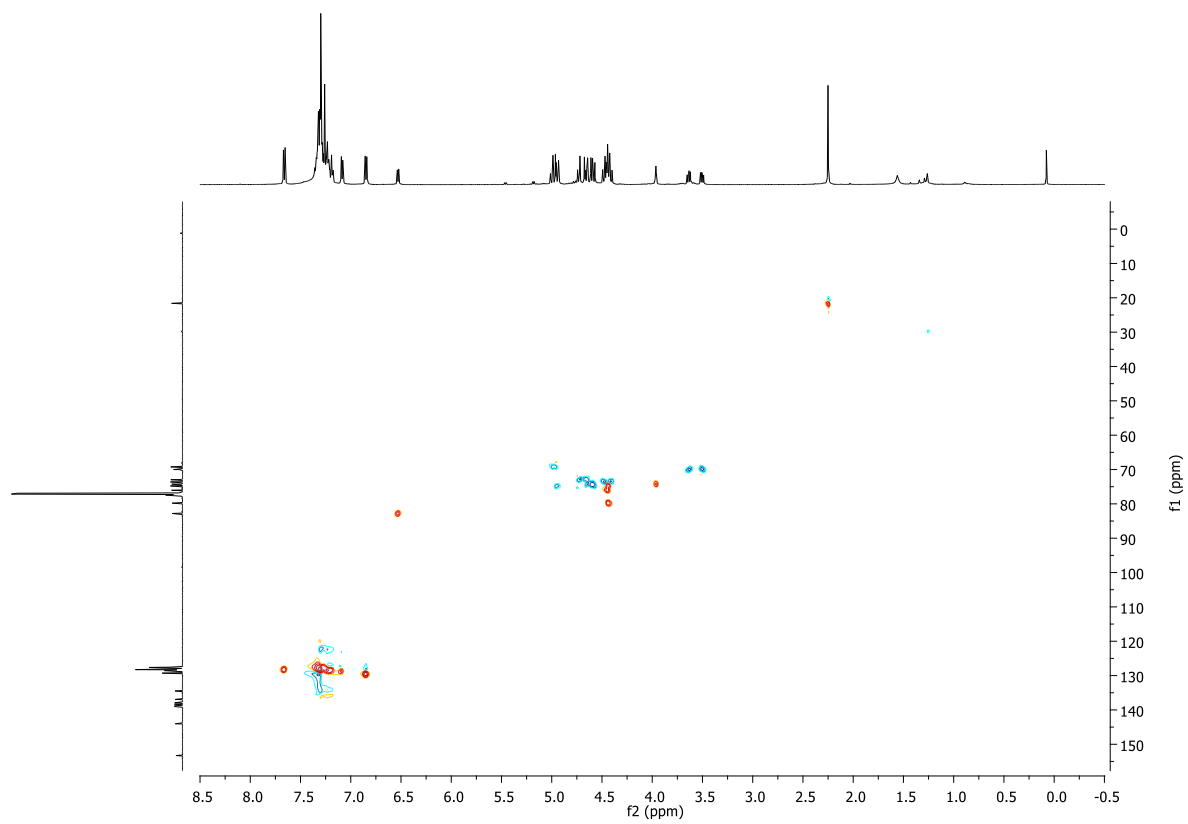

Compound S17 $\beta$

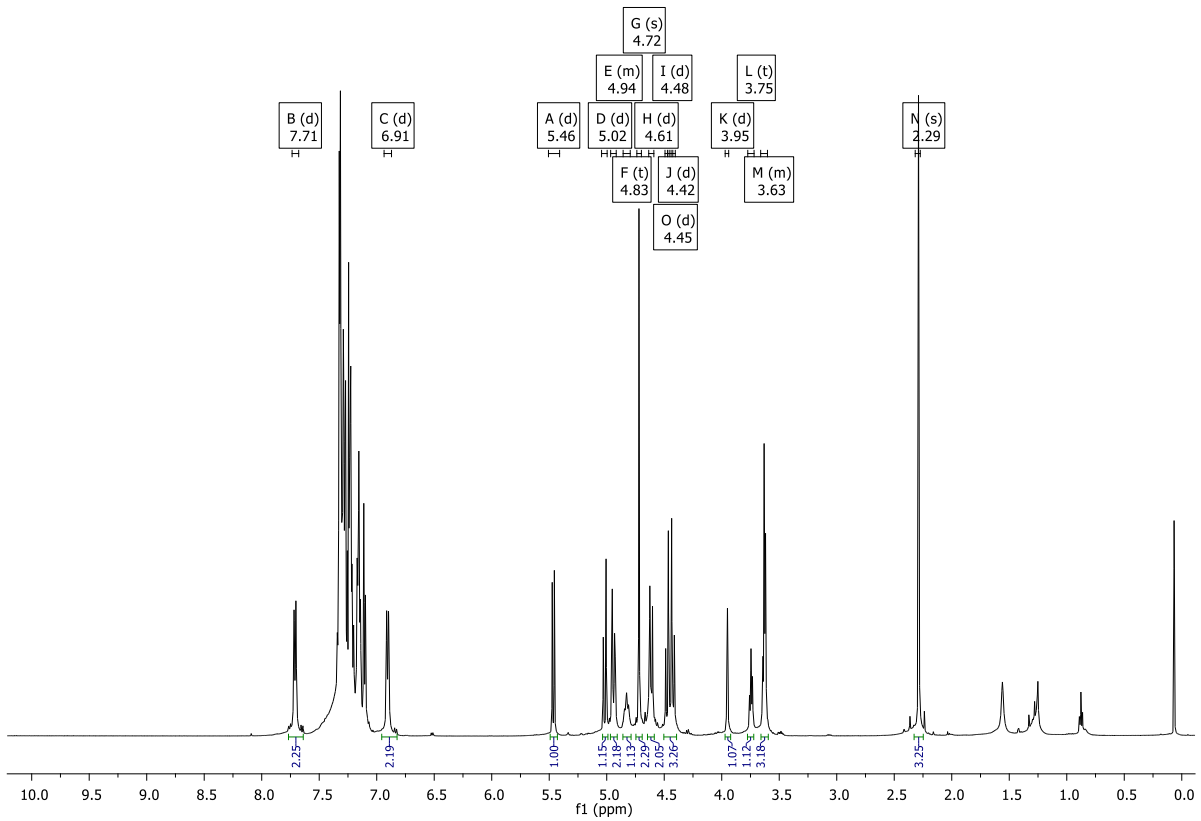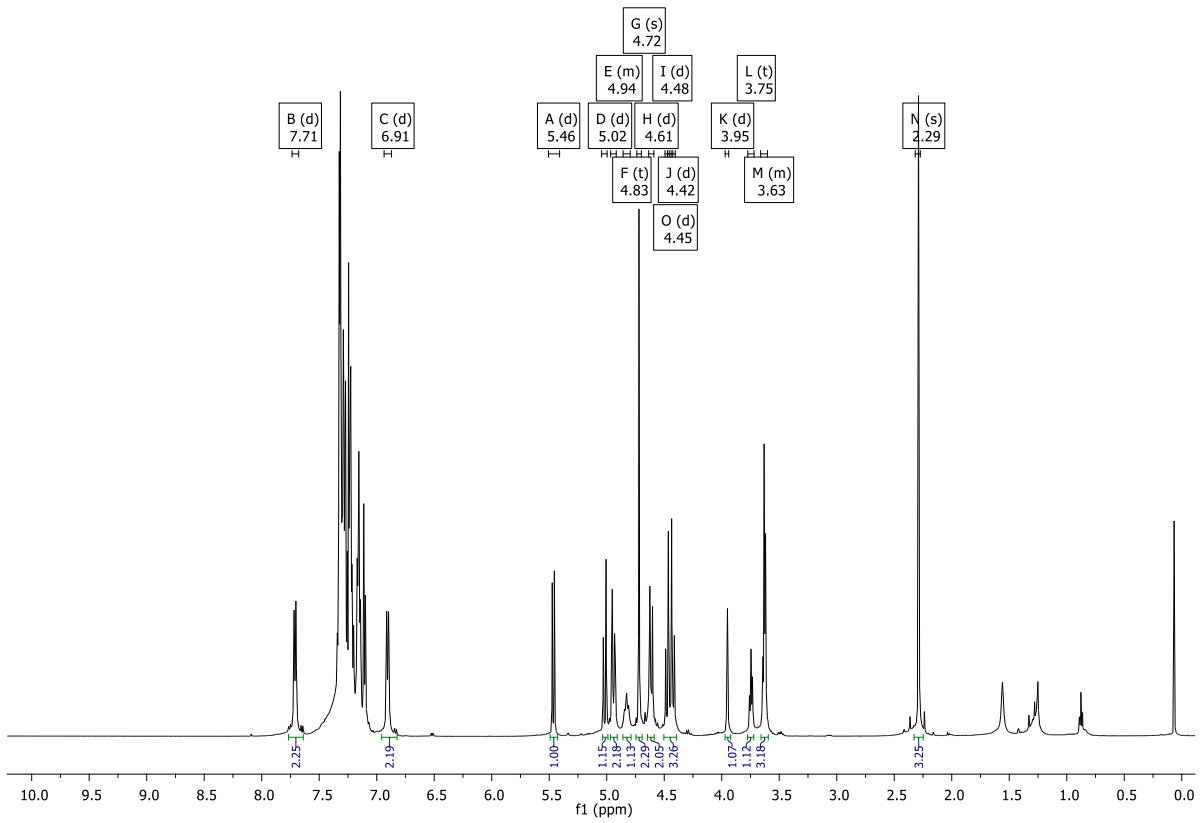

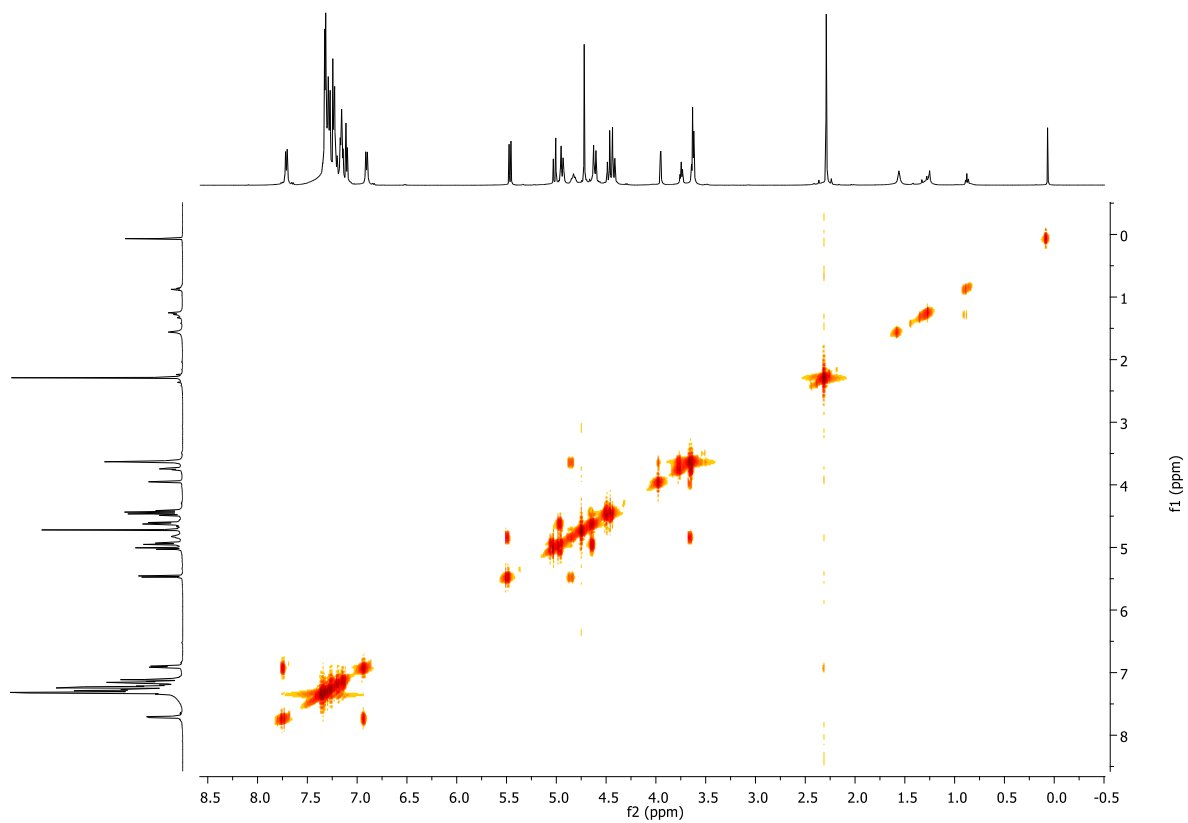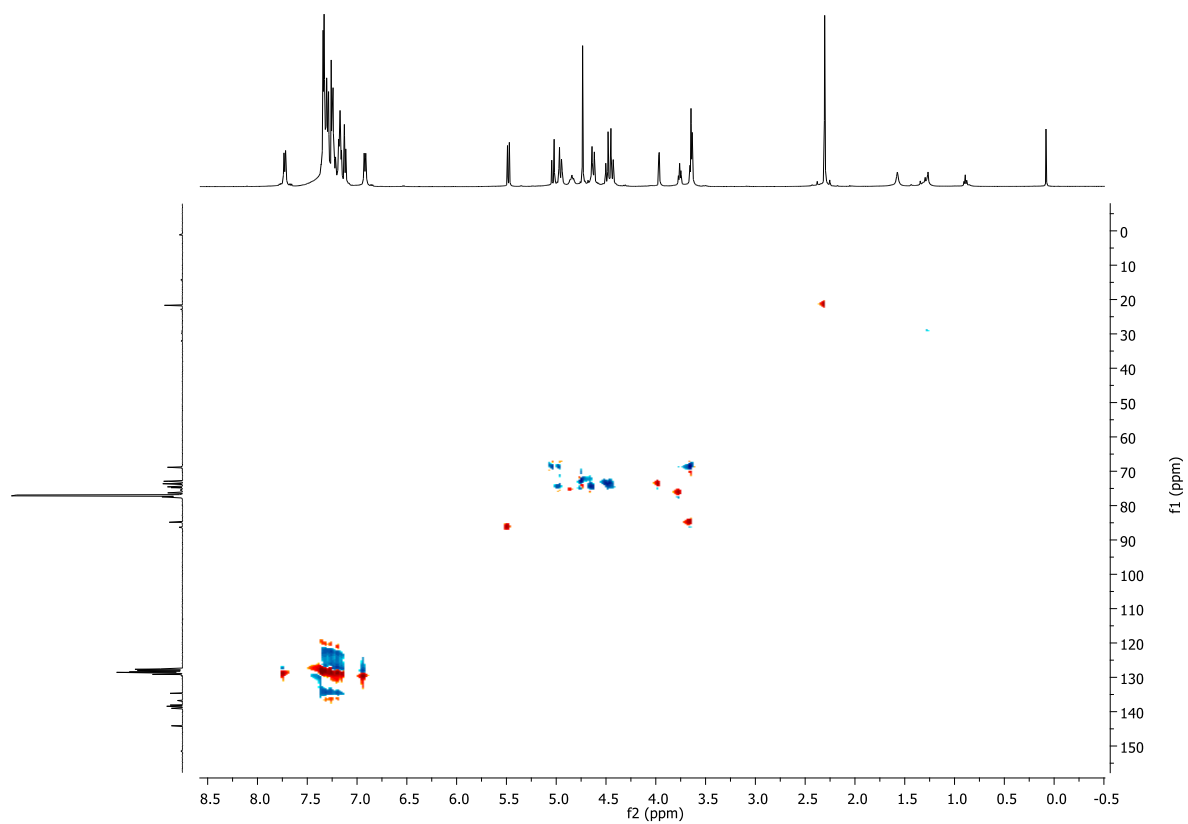

Compound S18 $\alpha$

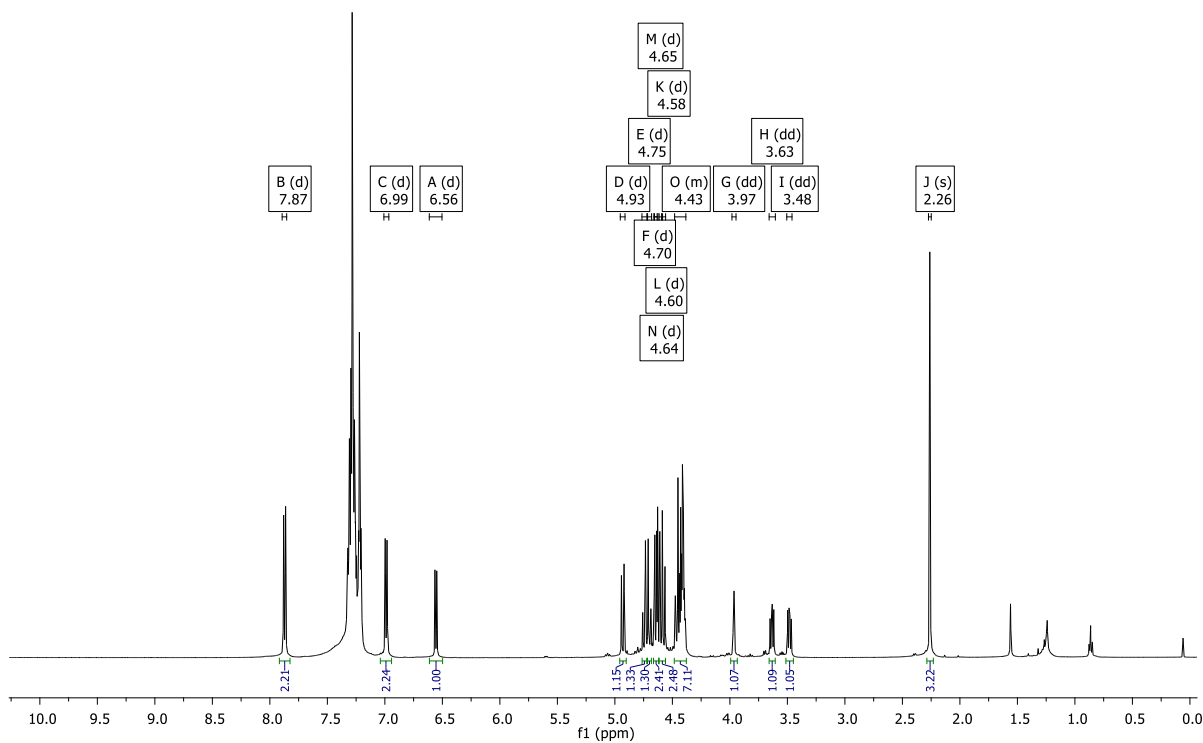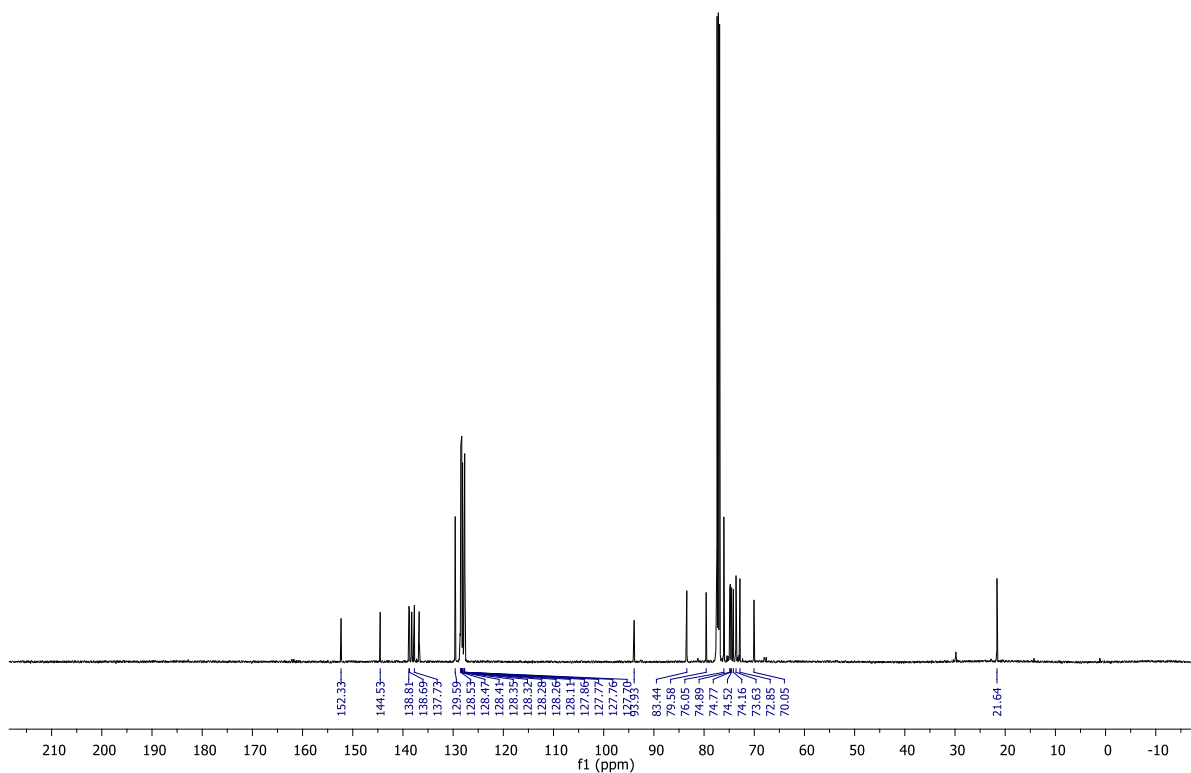

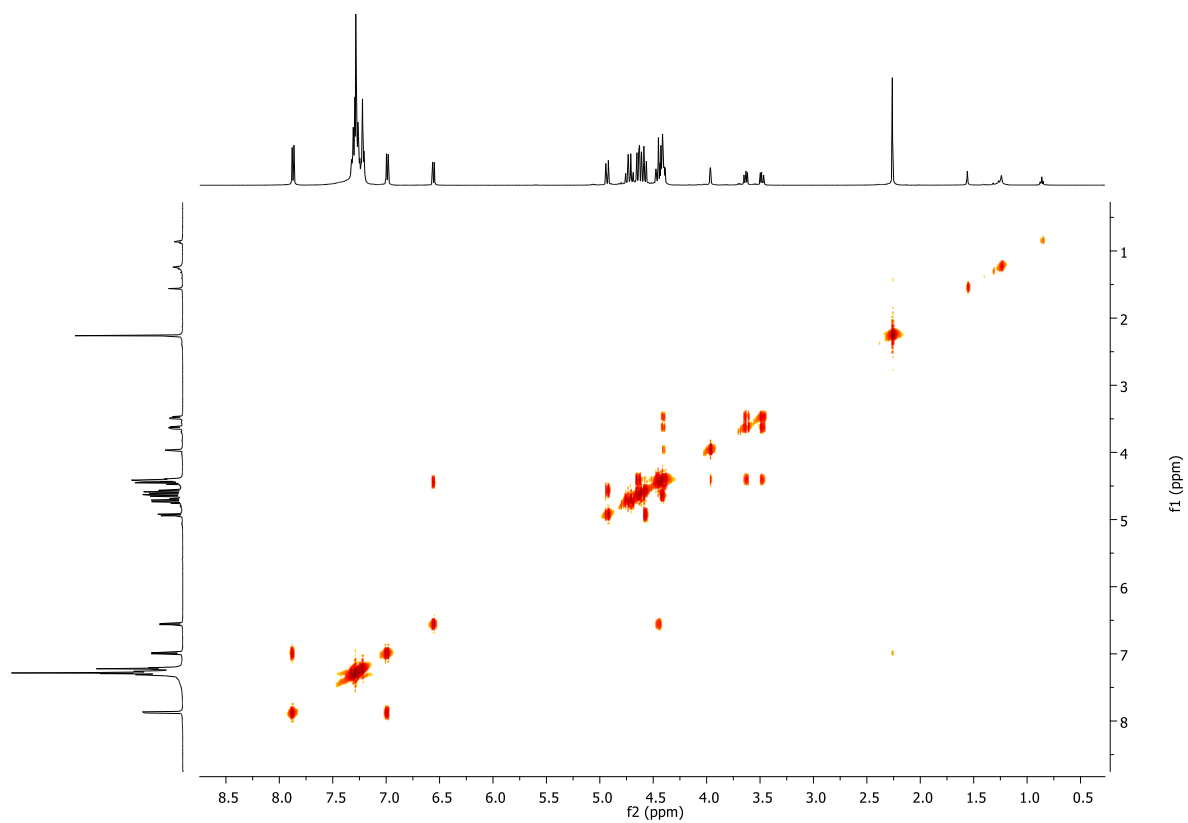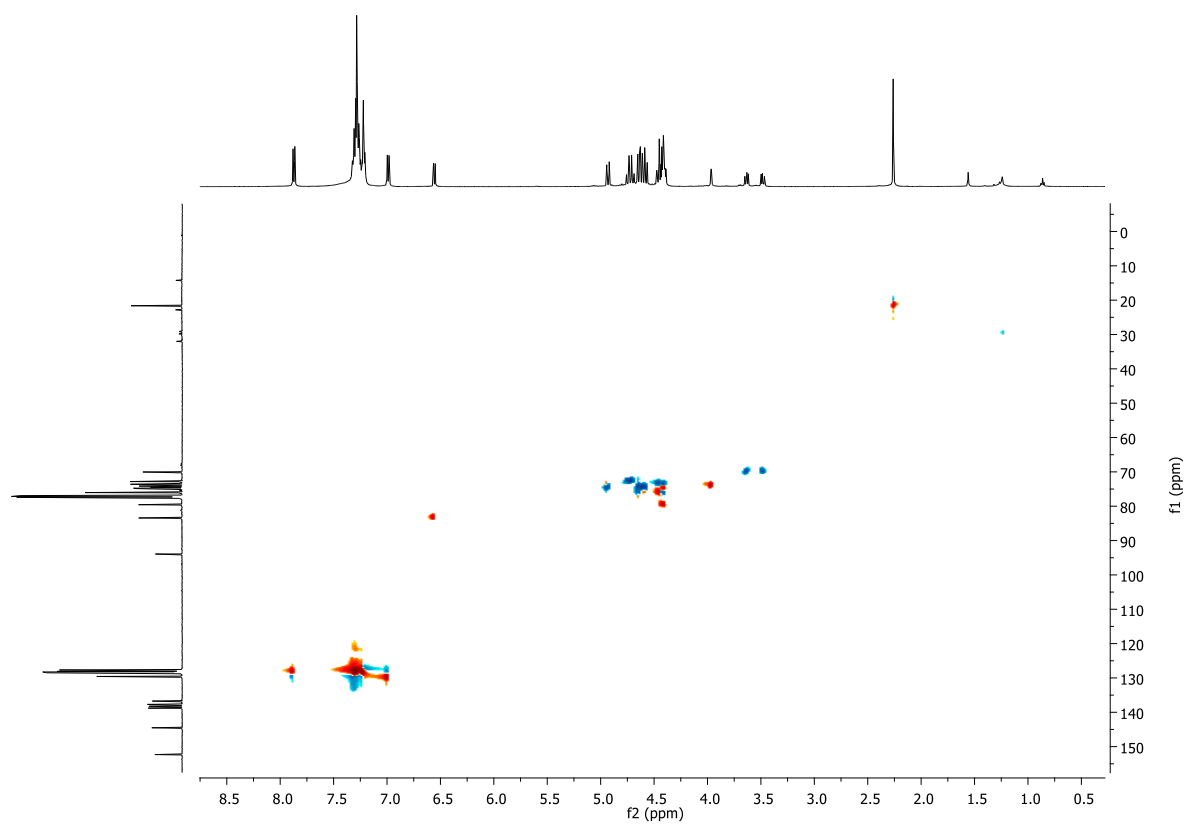

Compound S18 $\beta$

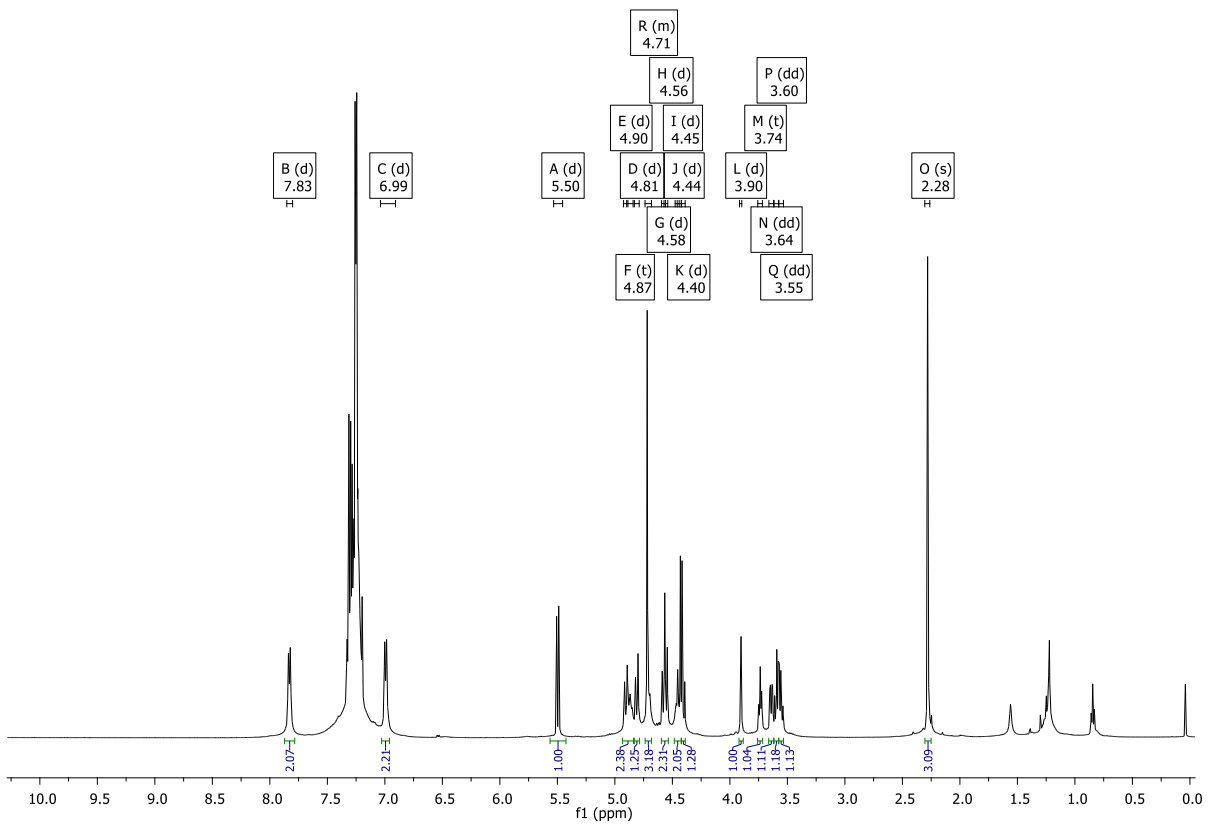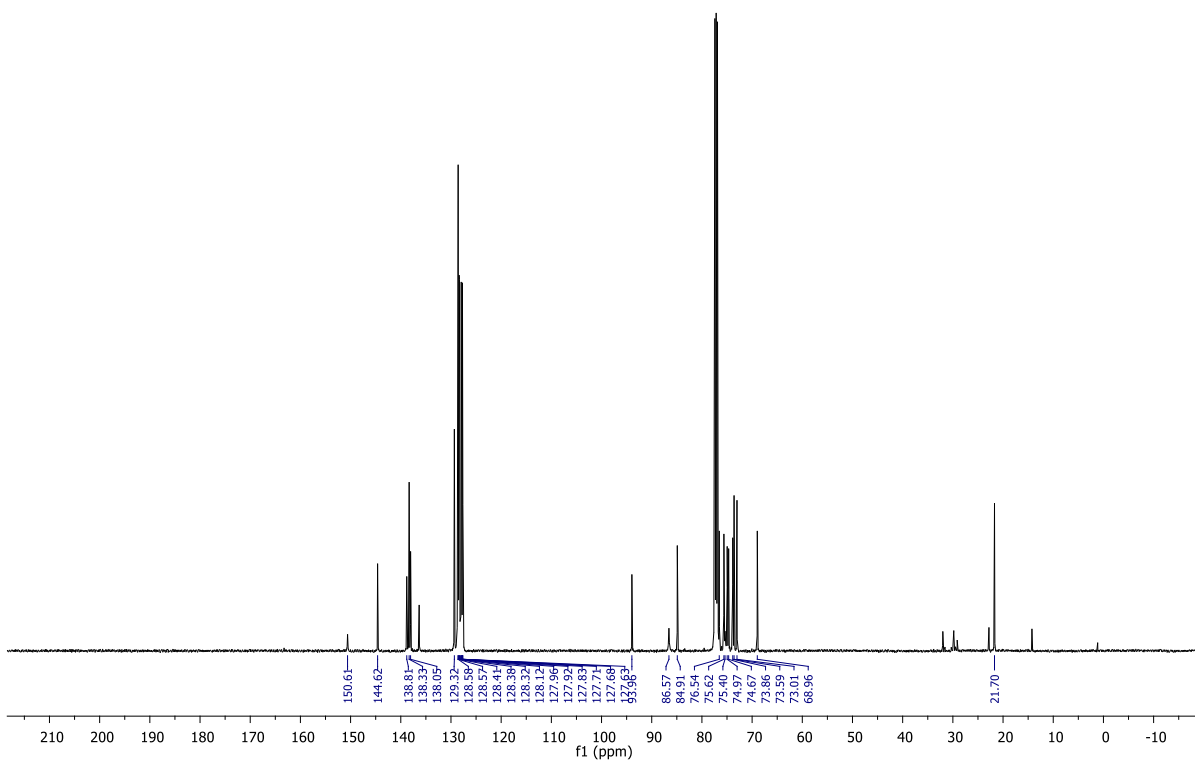



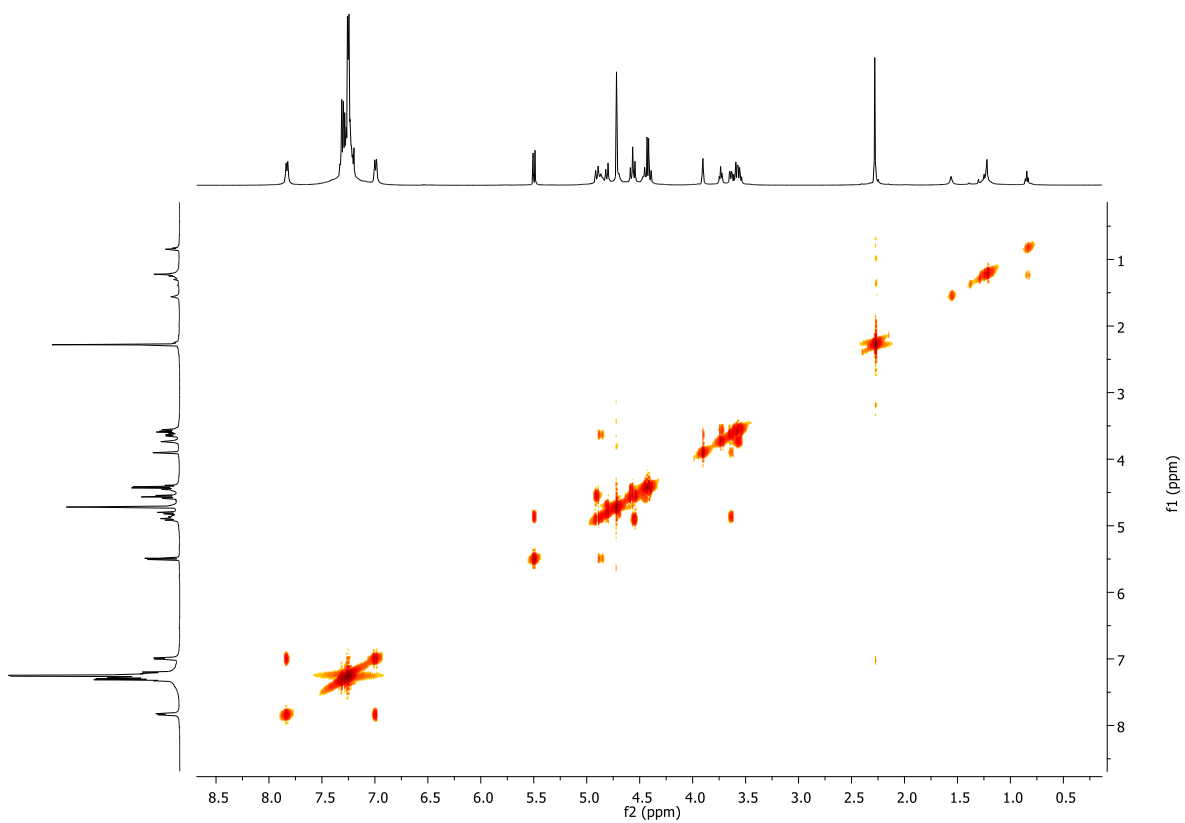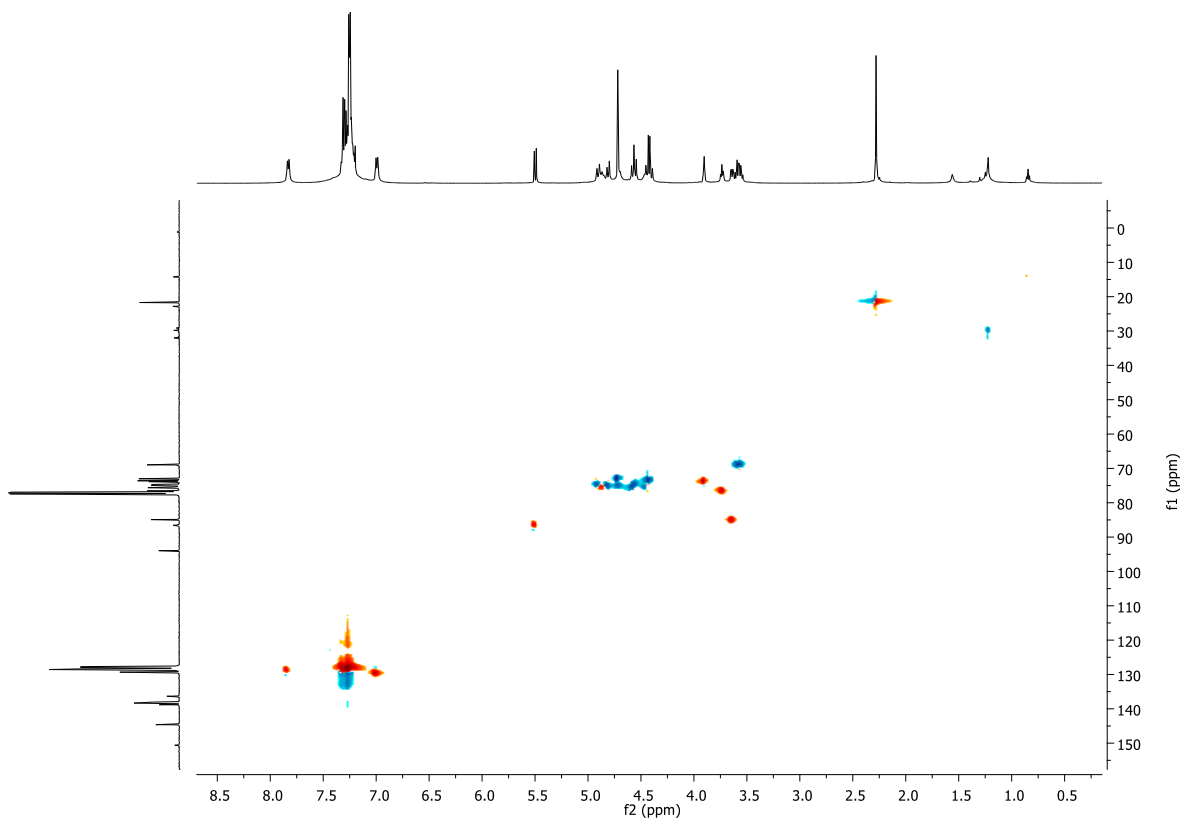

Compound S19

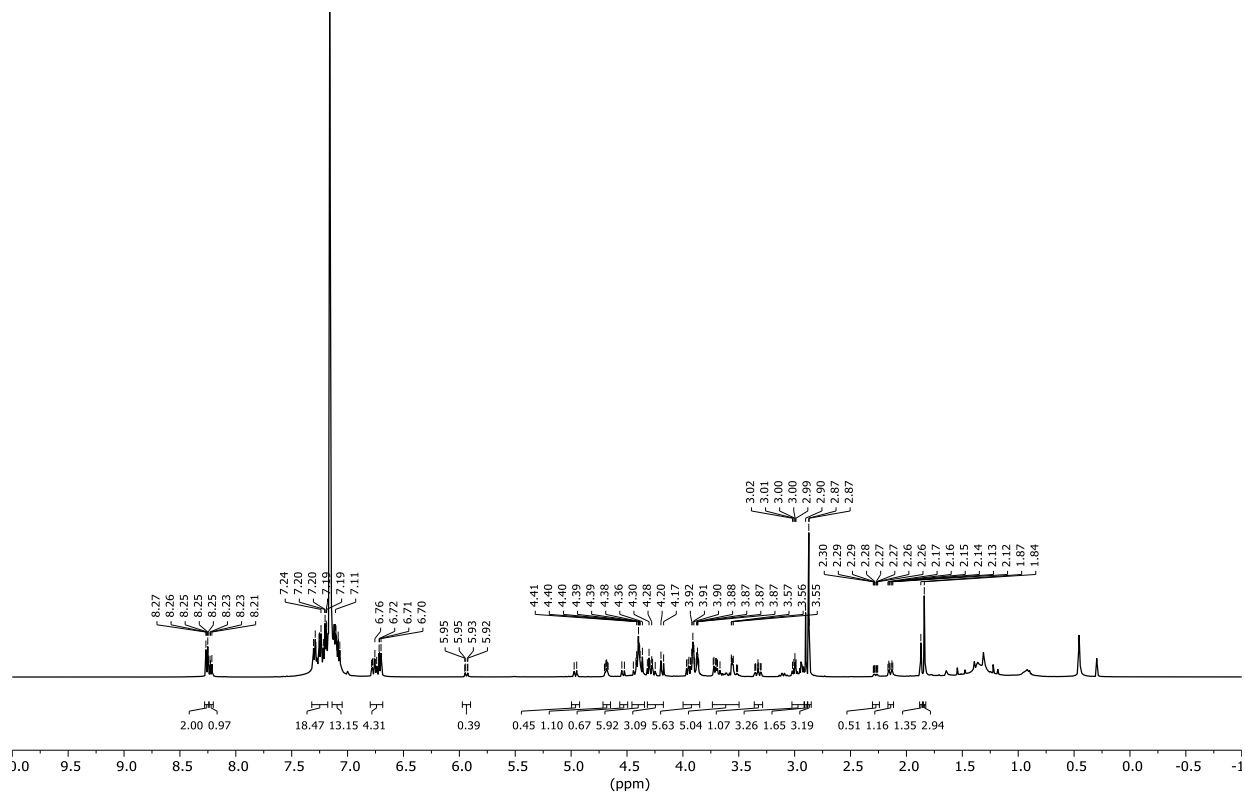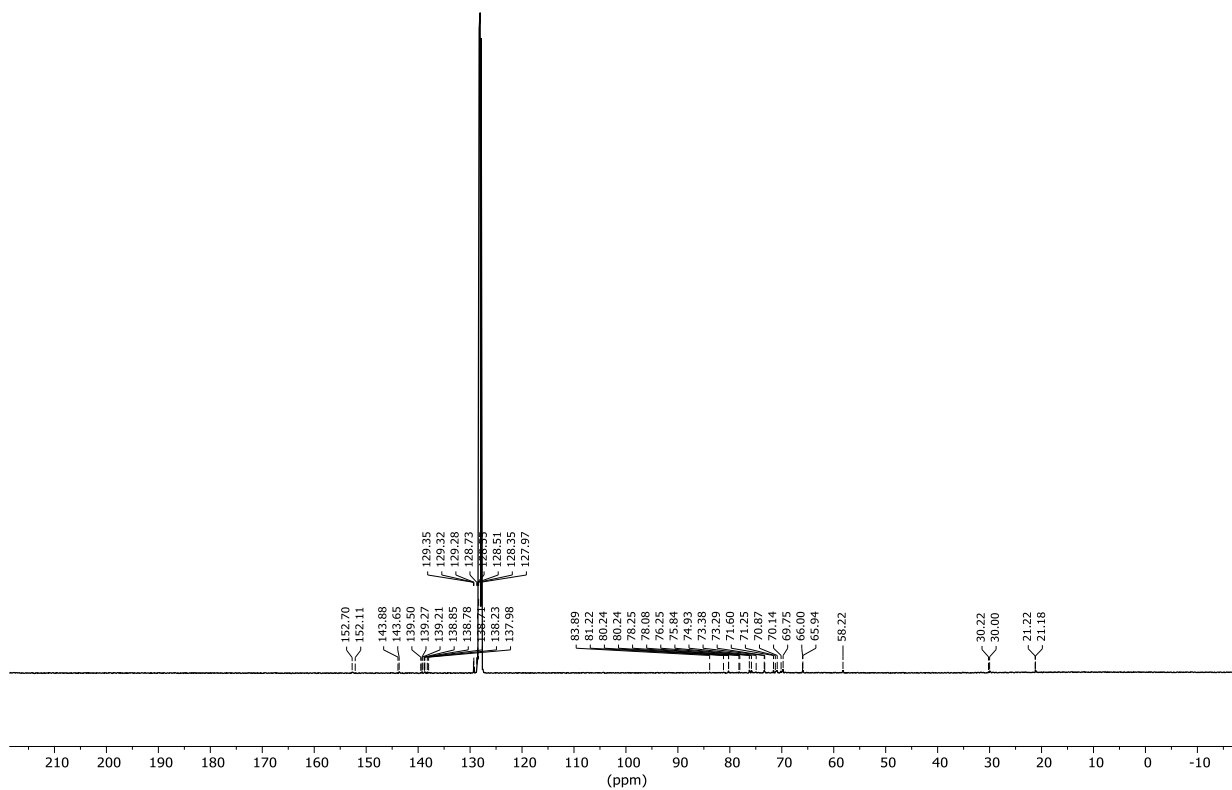

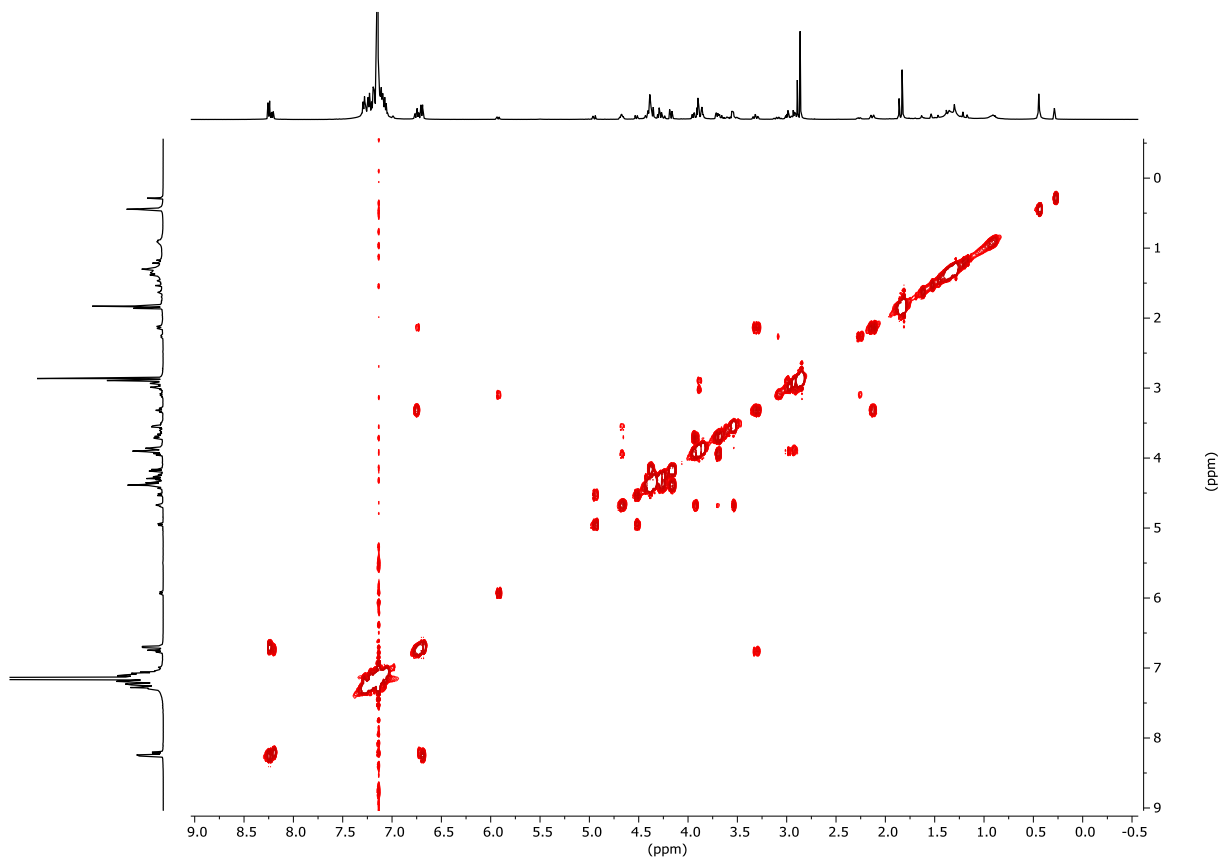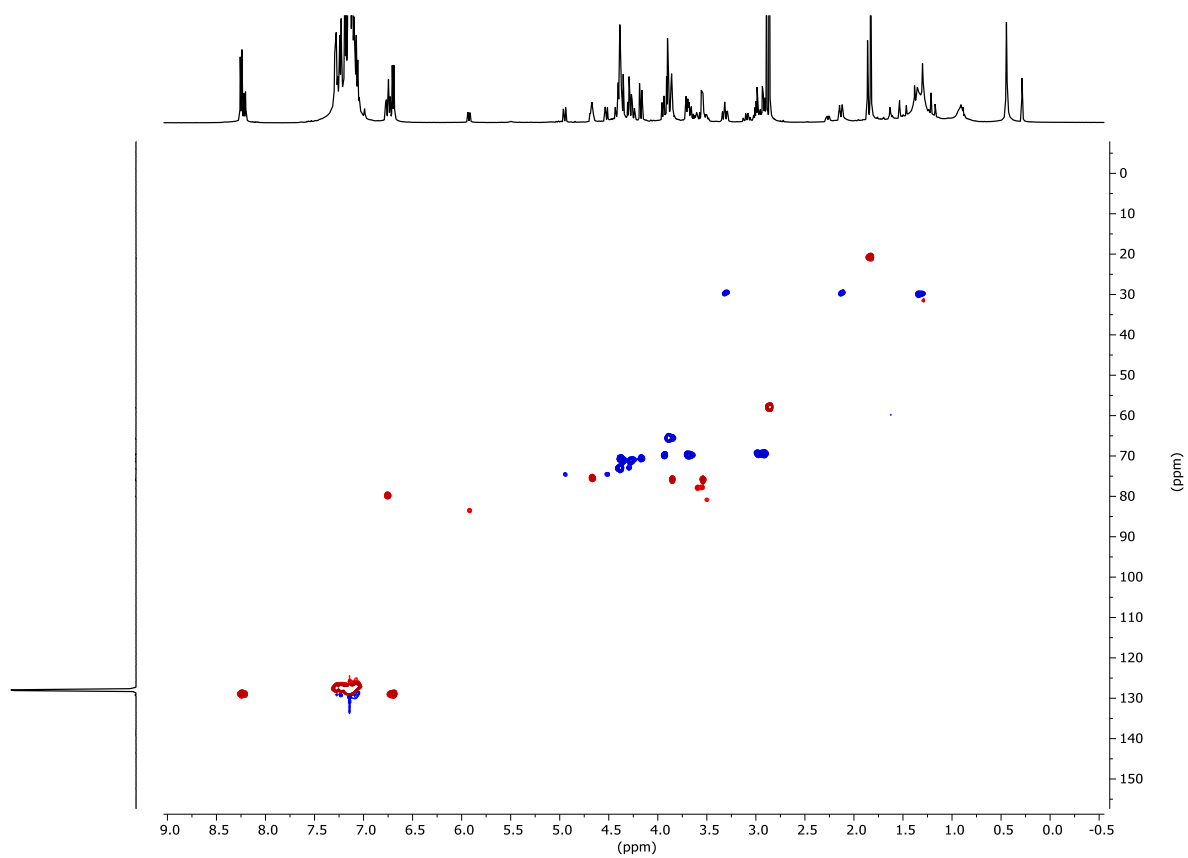

Compound S20 $\alpha$

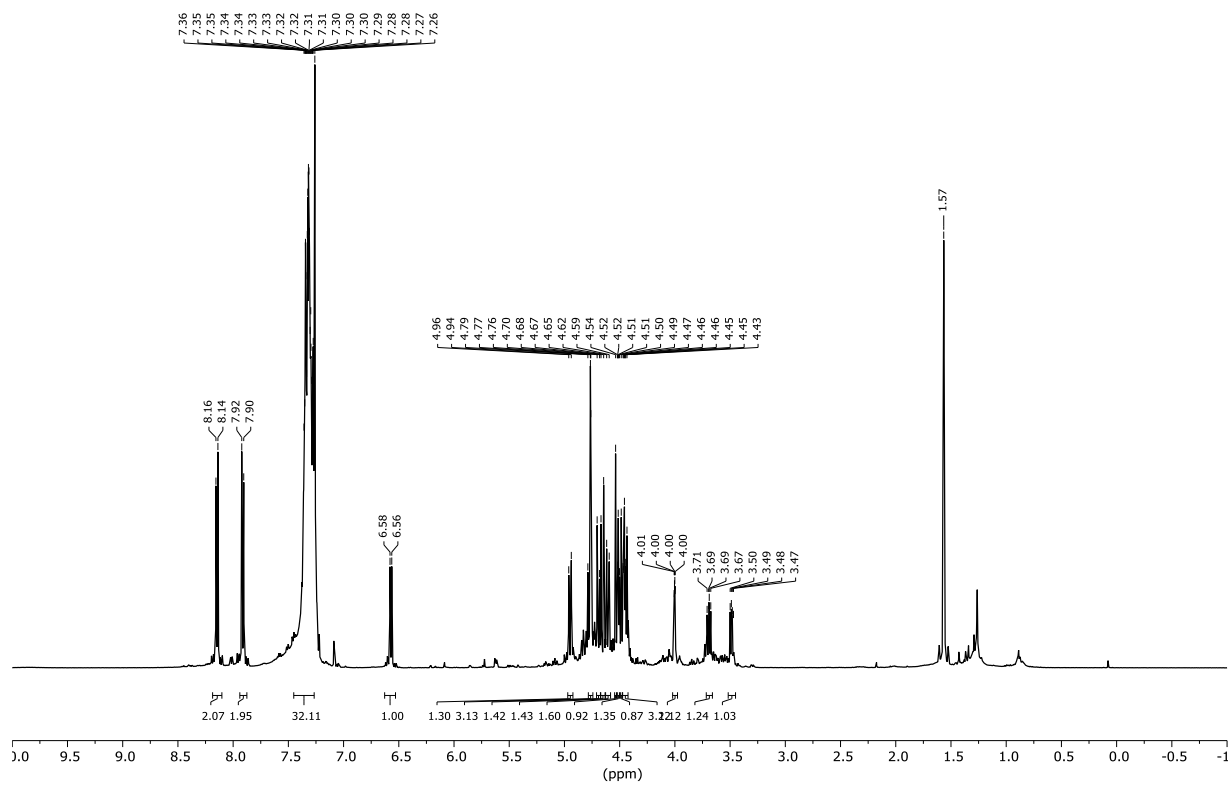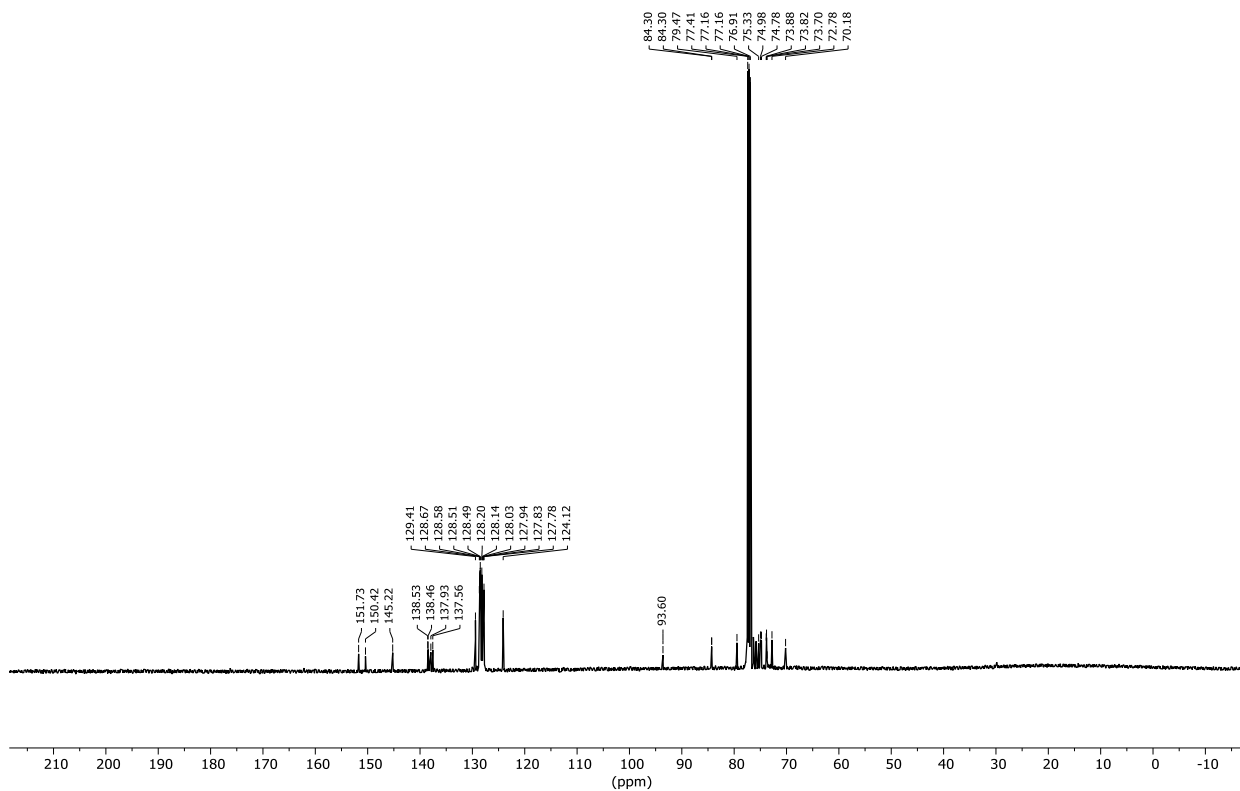

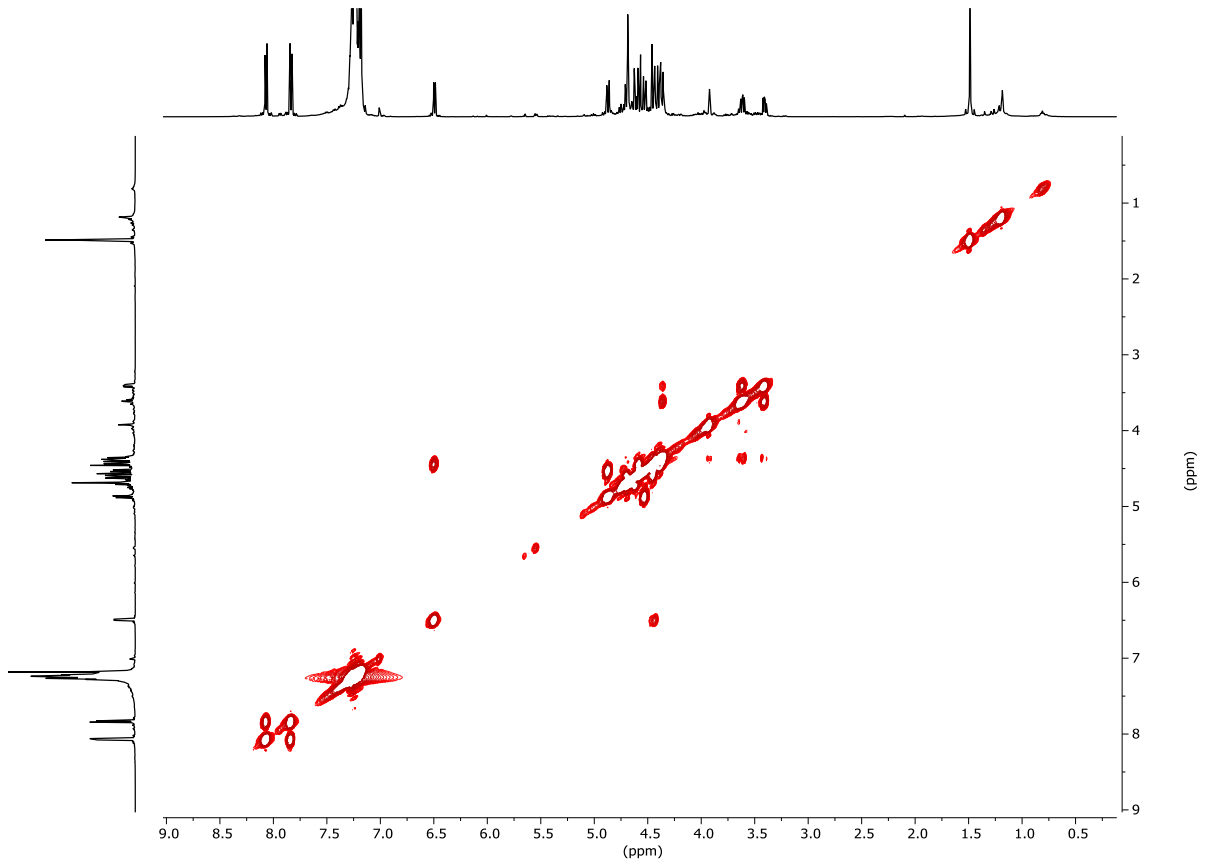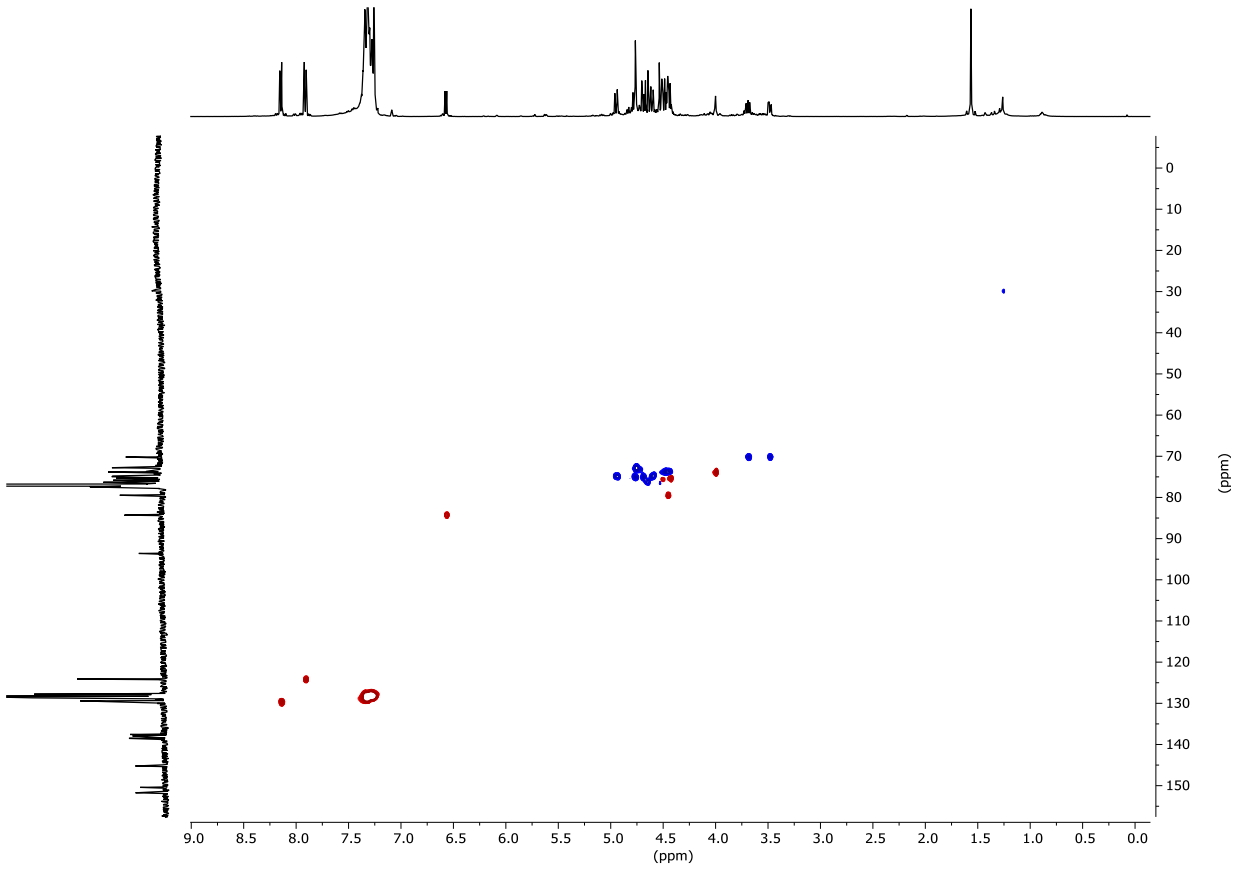

Compound S20β

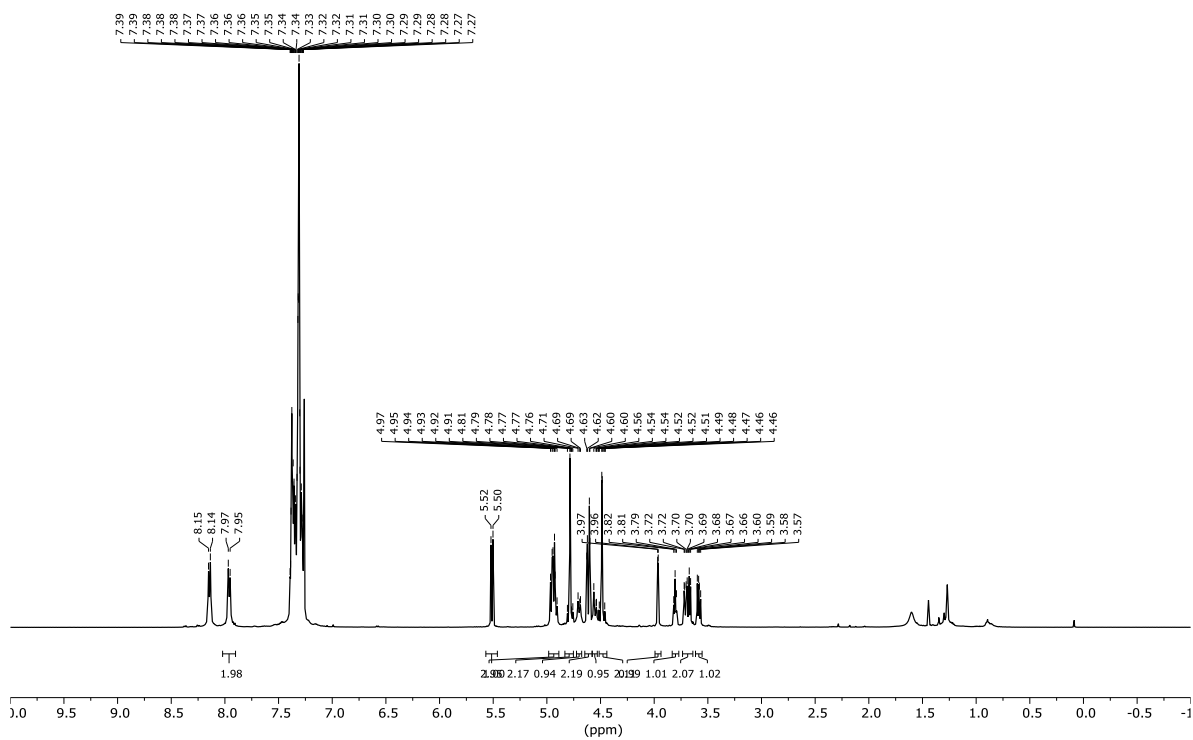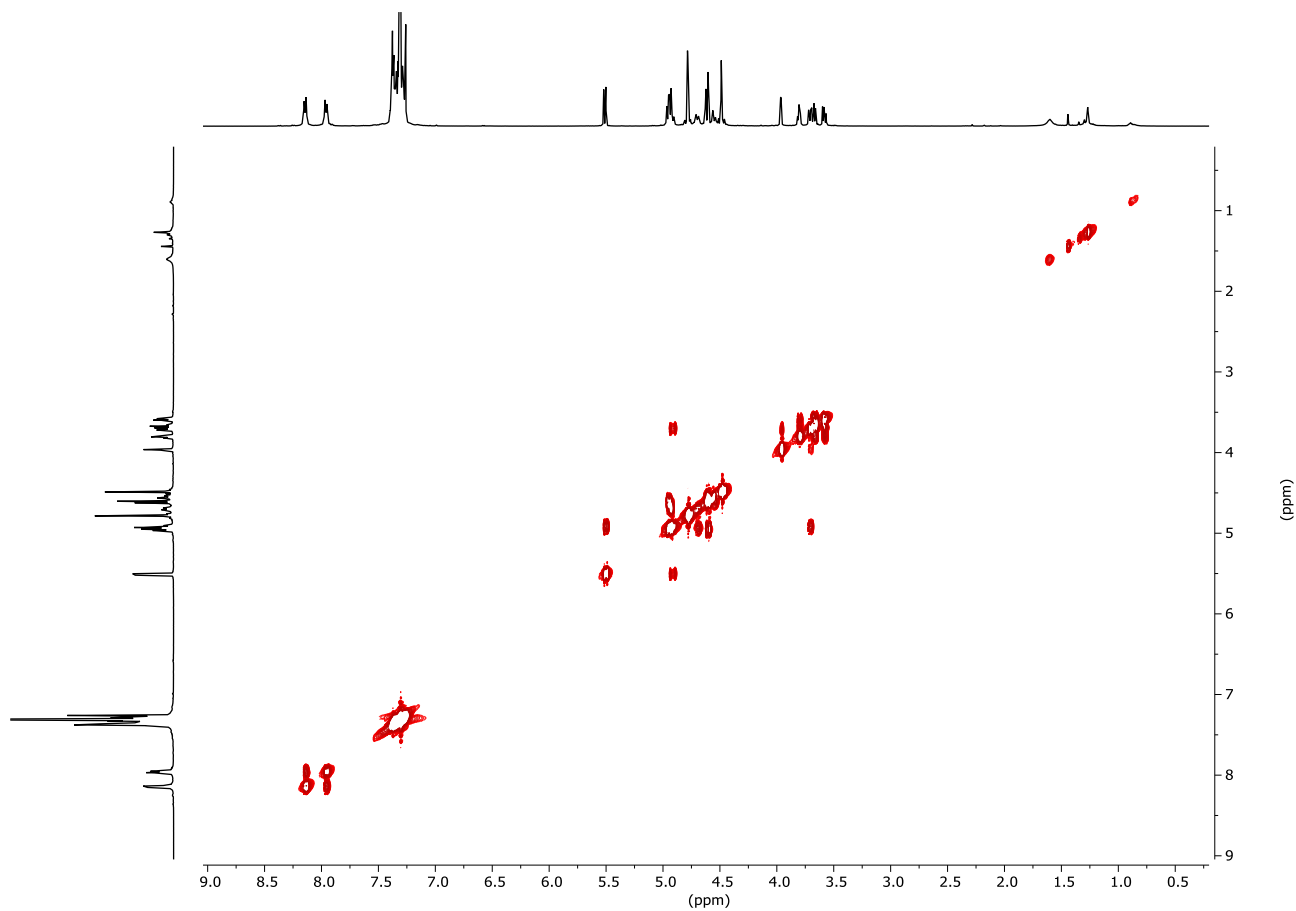

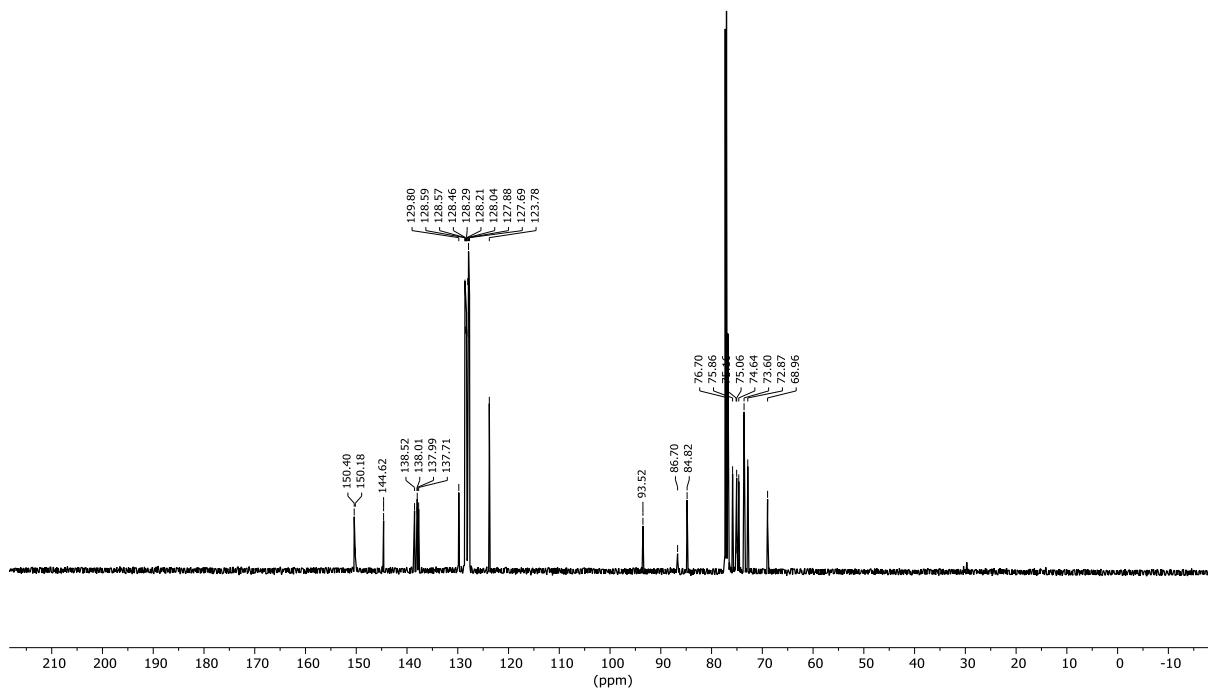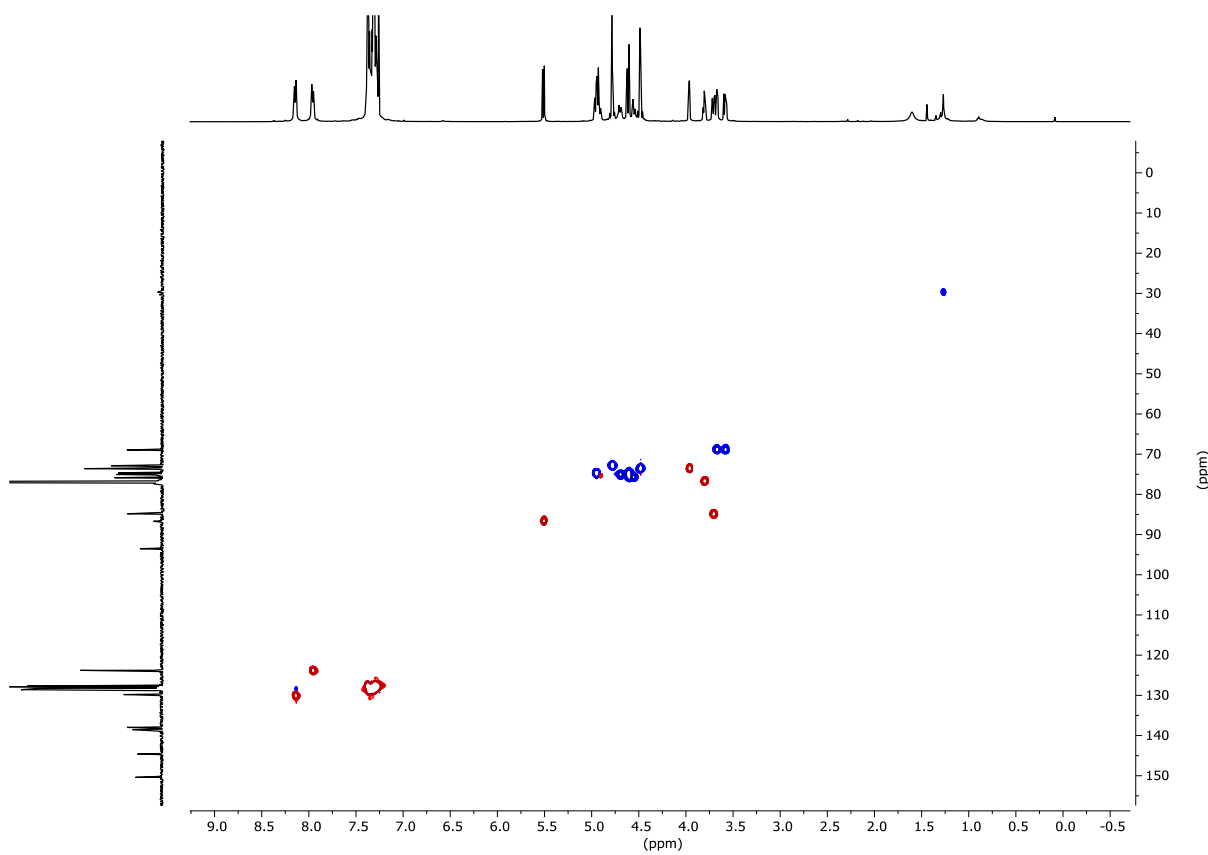

Compound S21

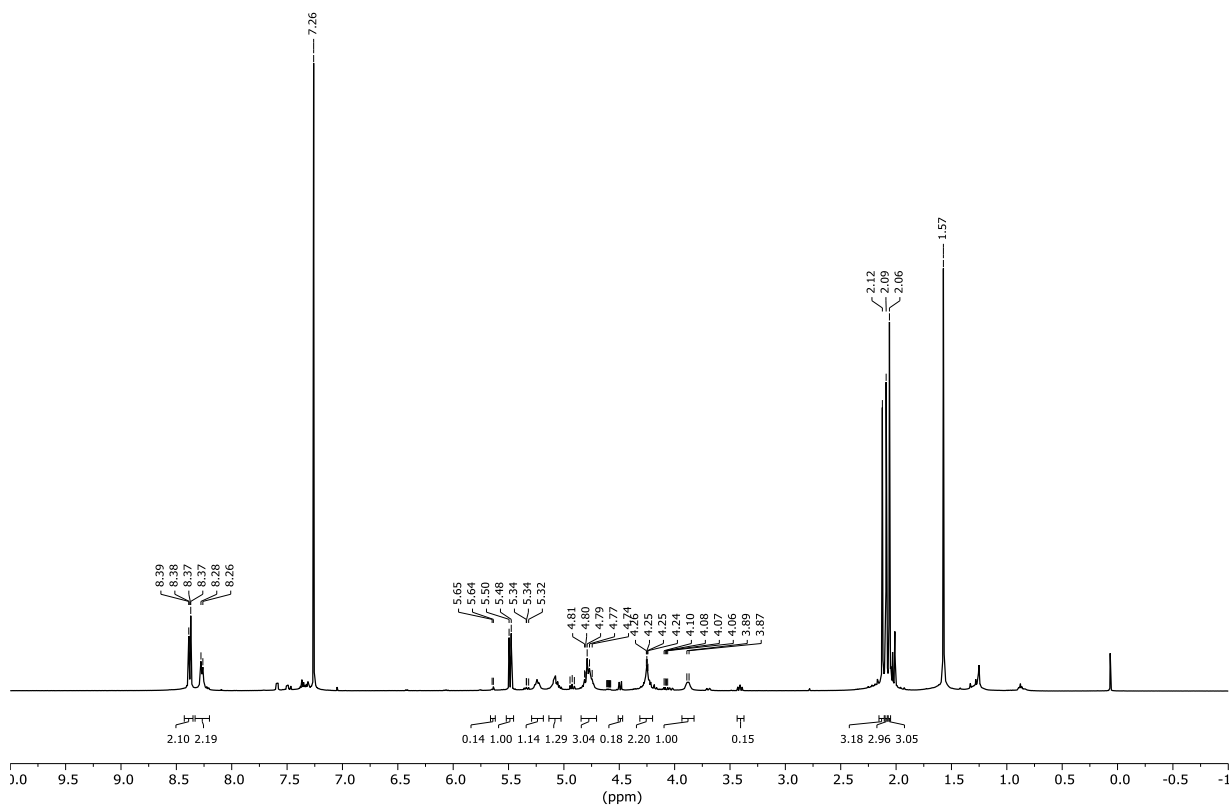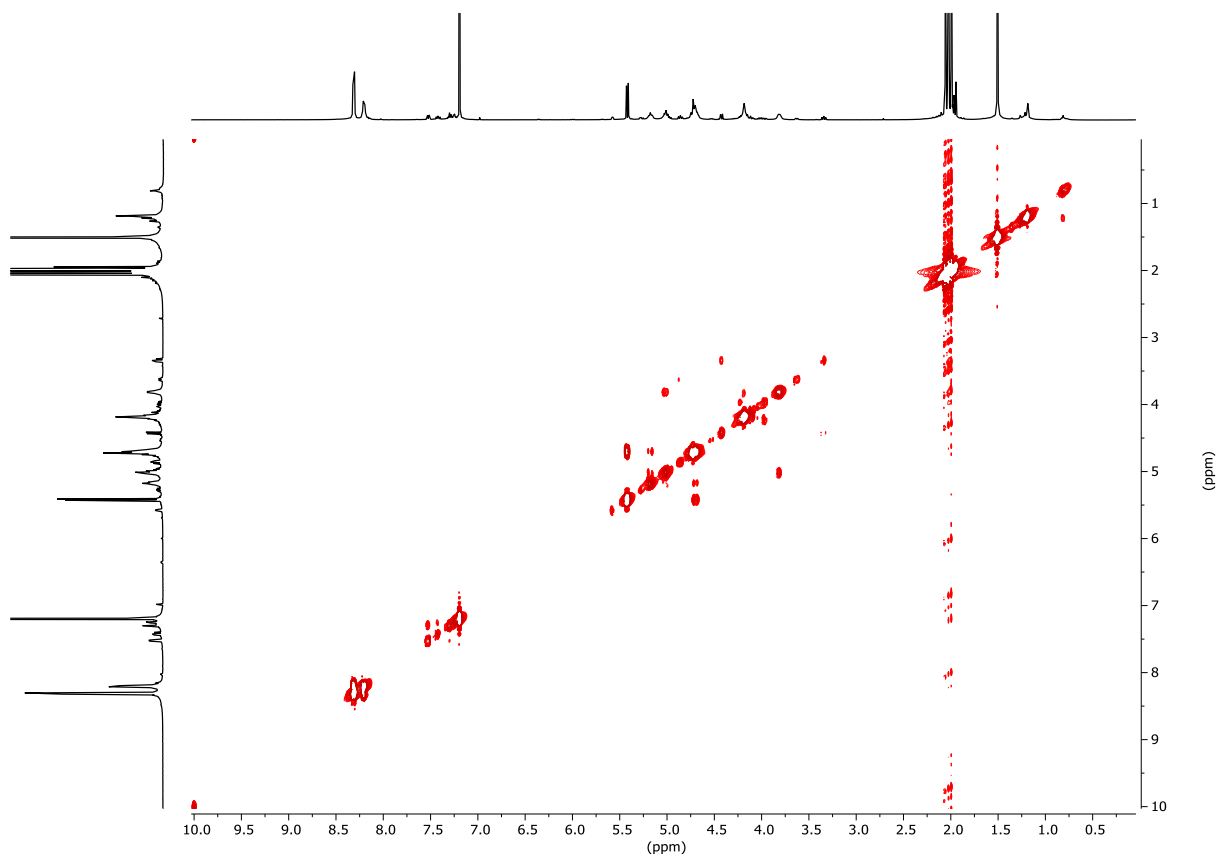



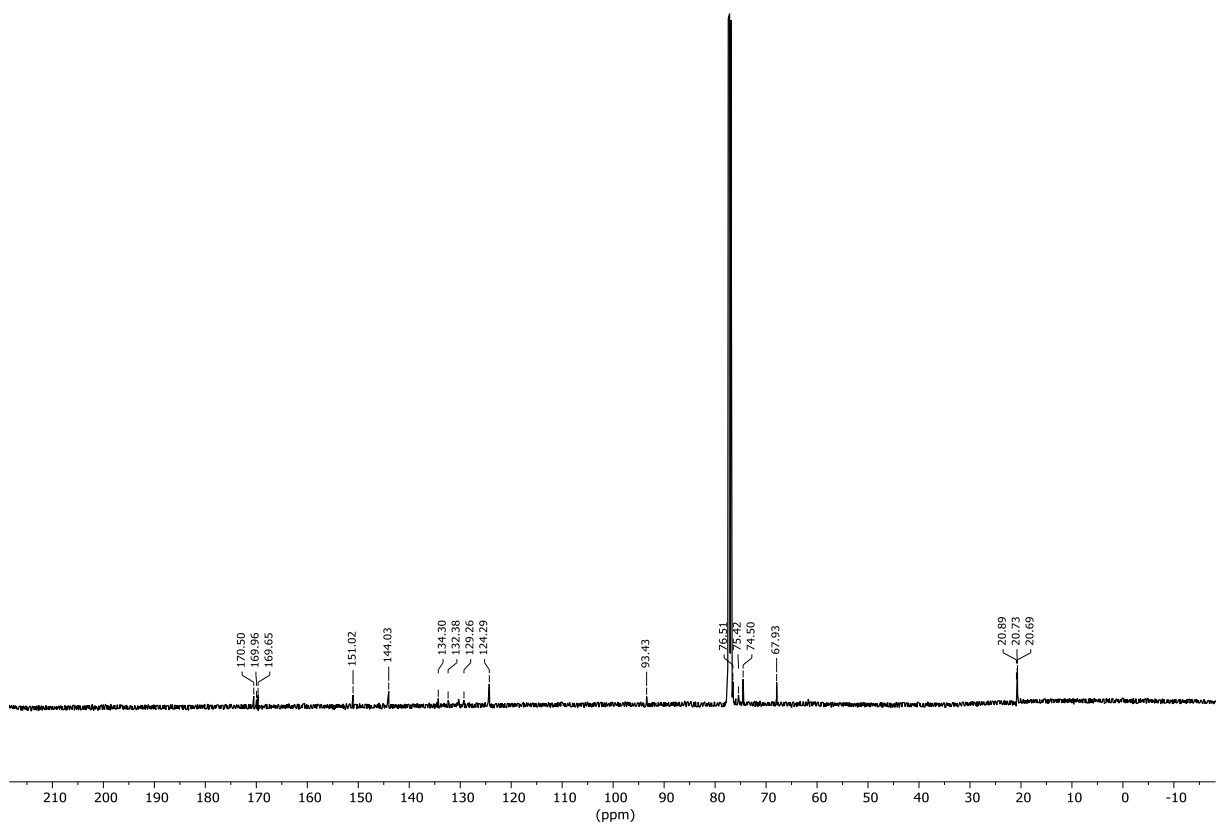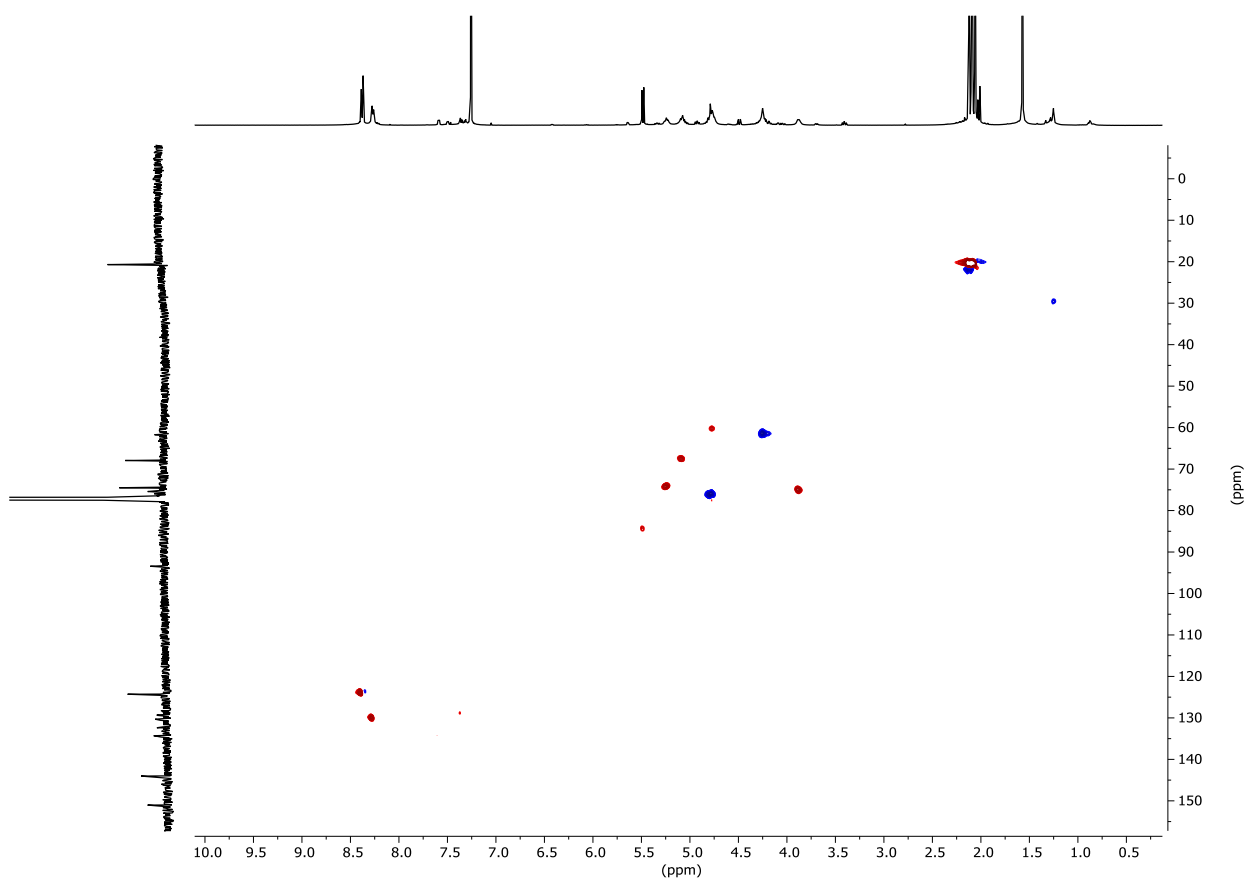

Compound S22α

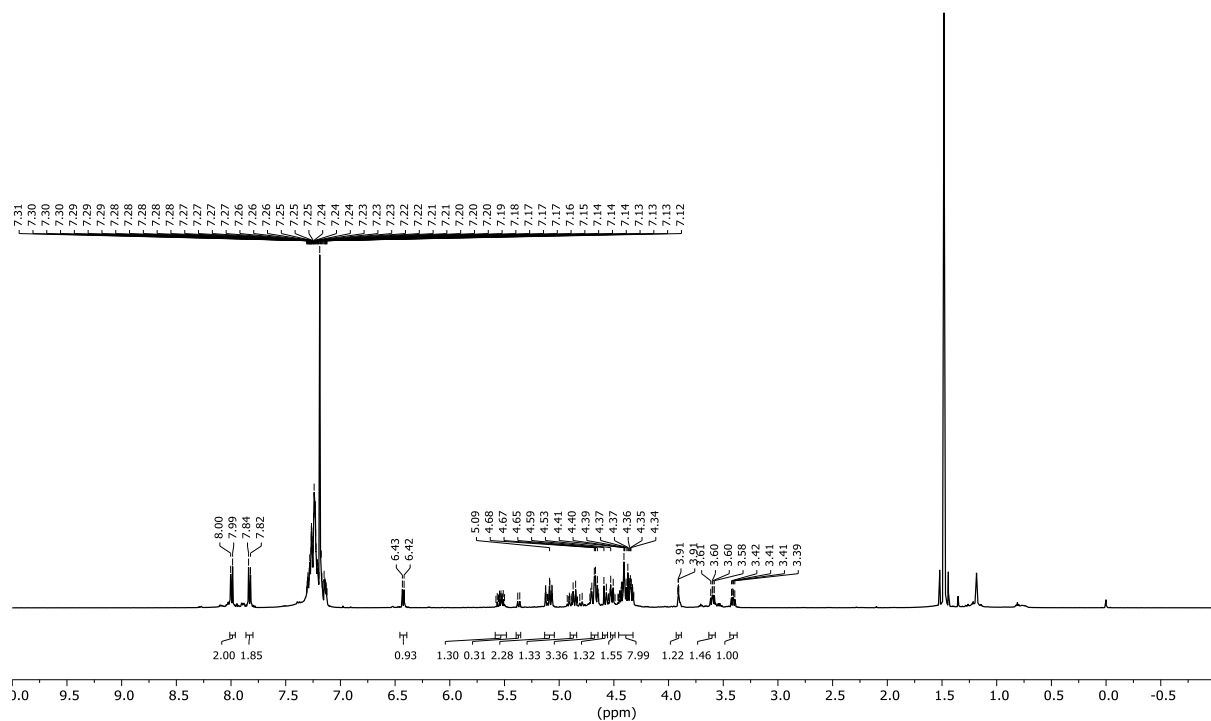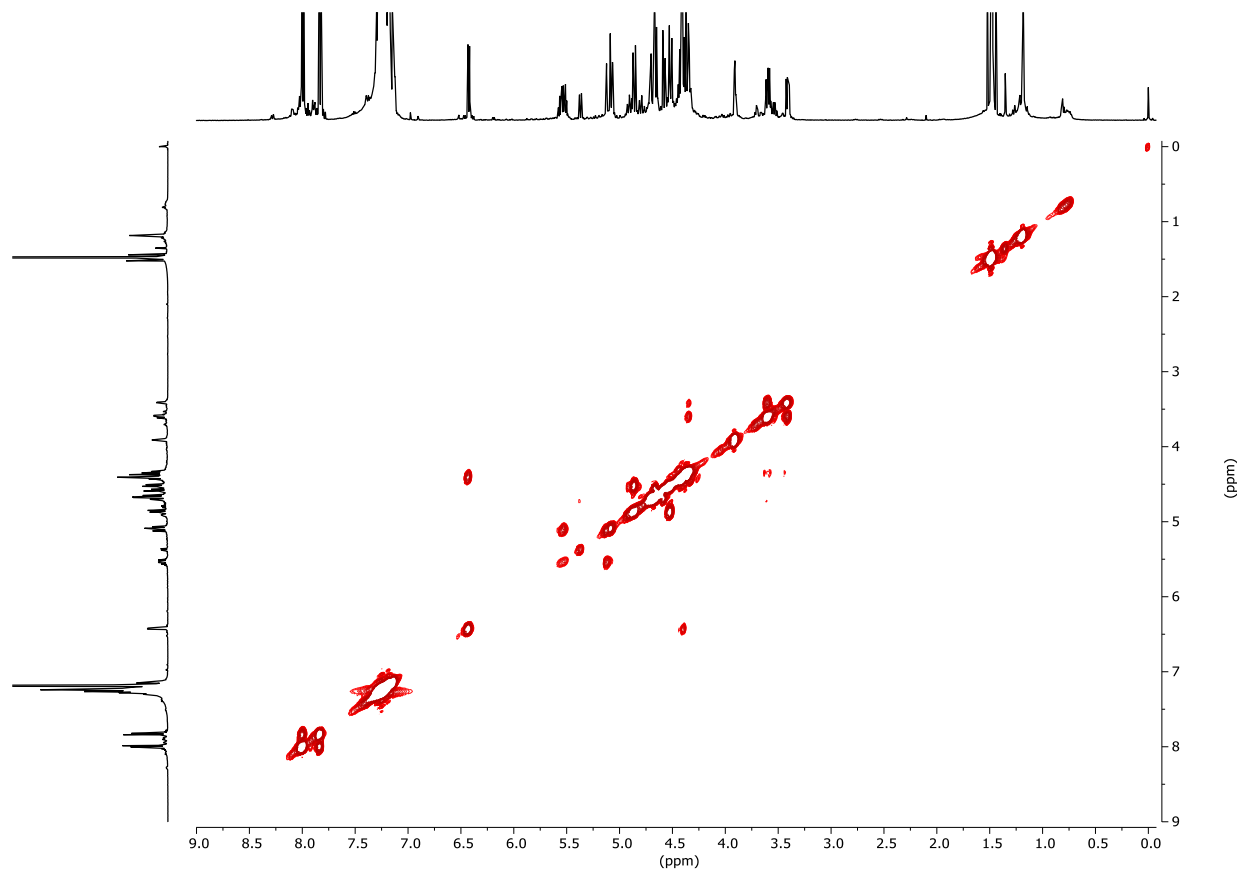

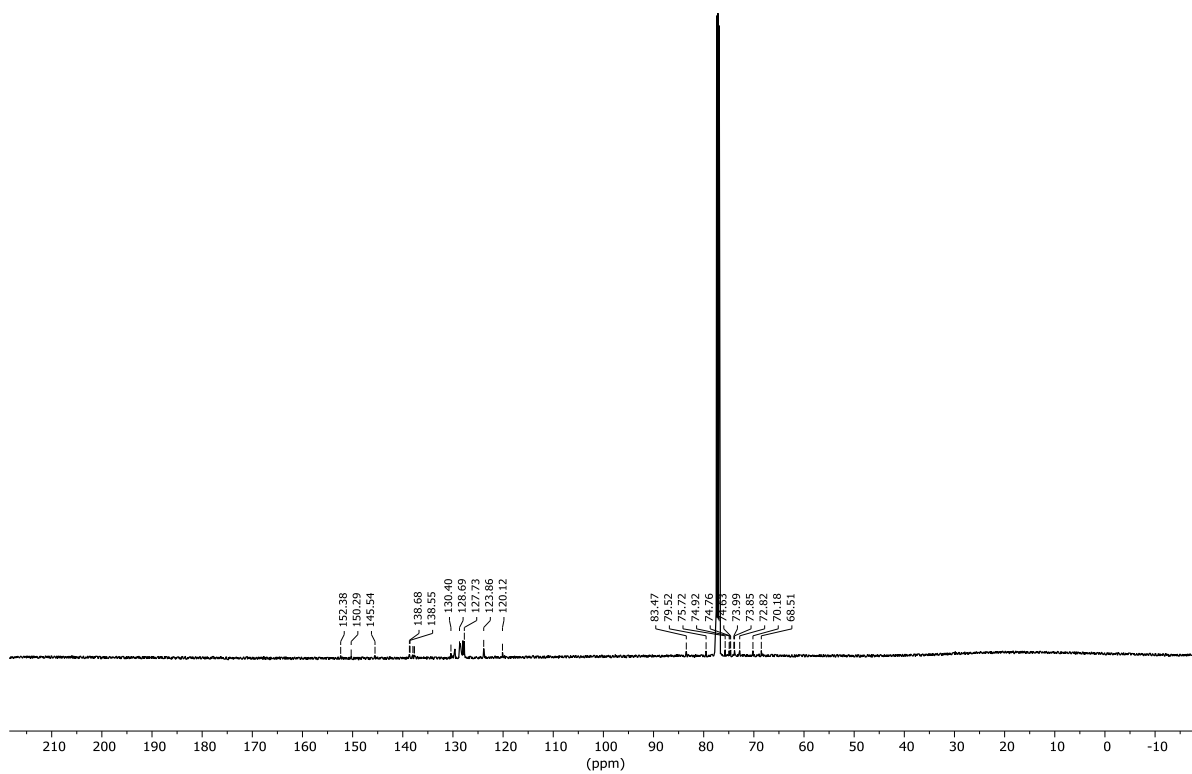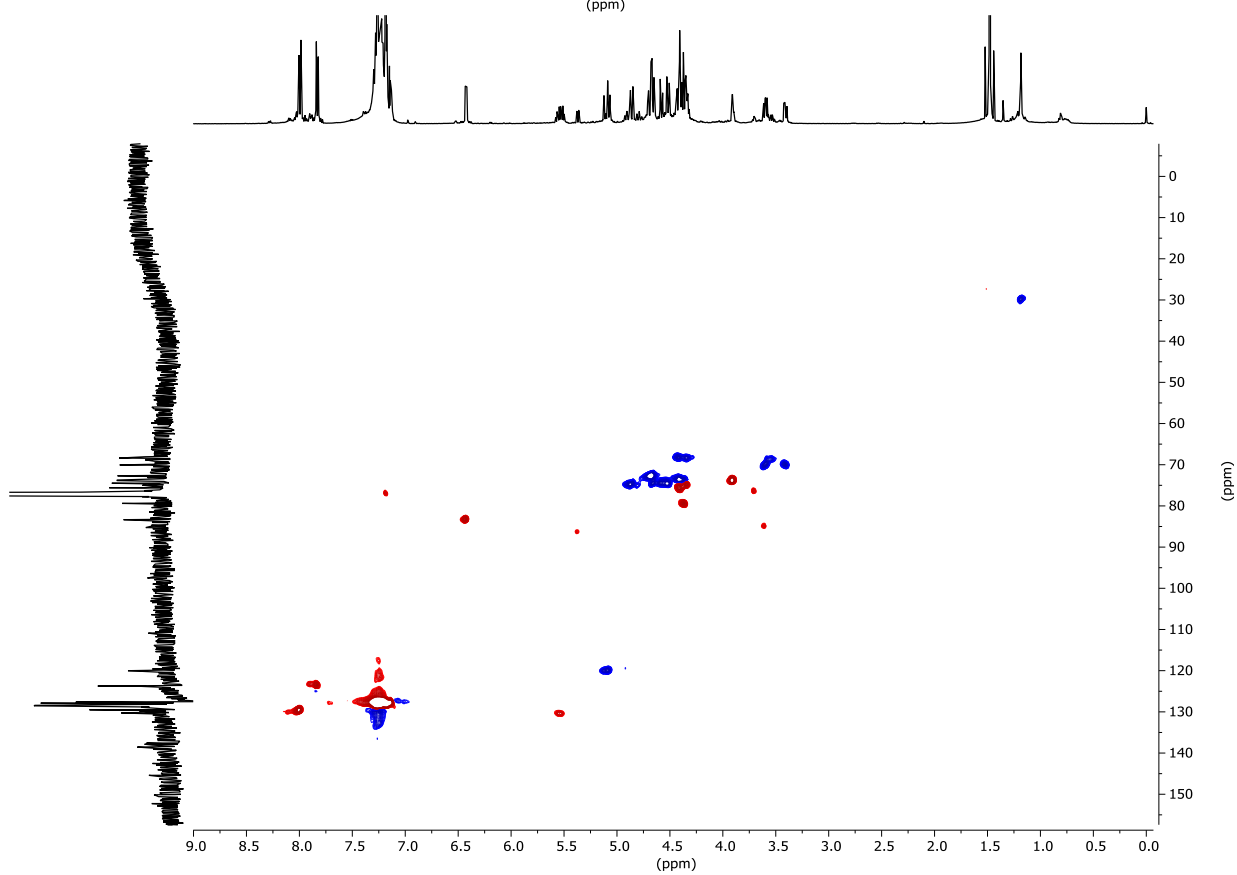



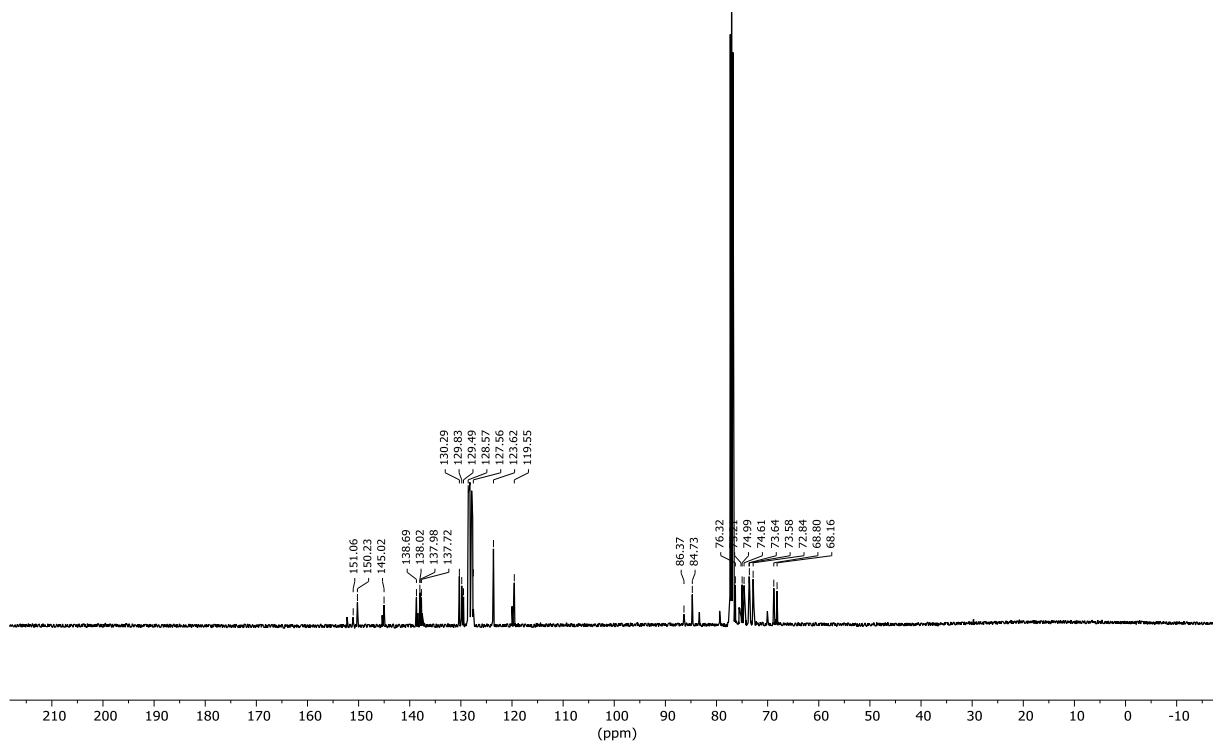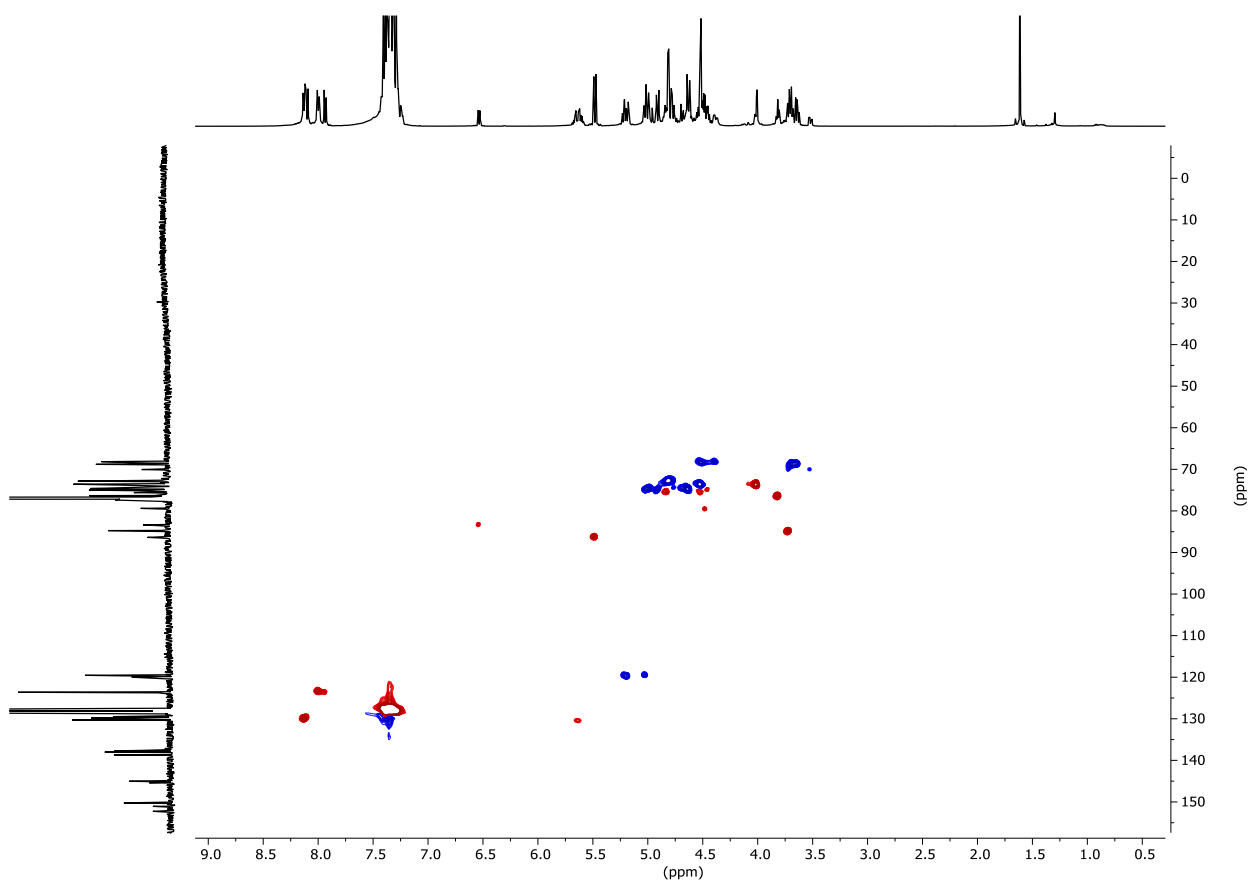

Compound S23

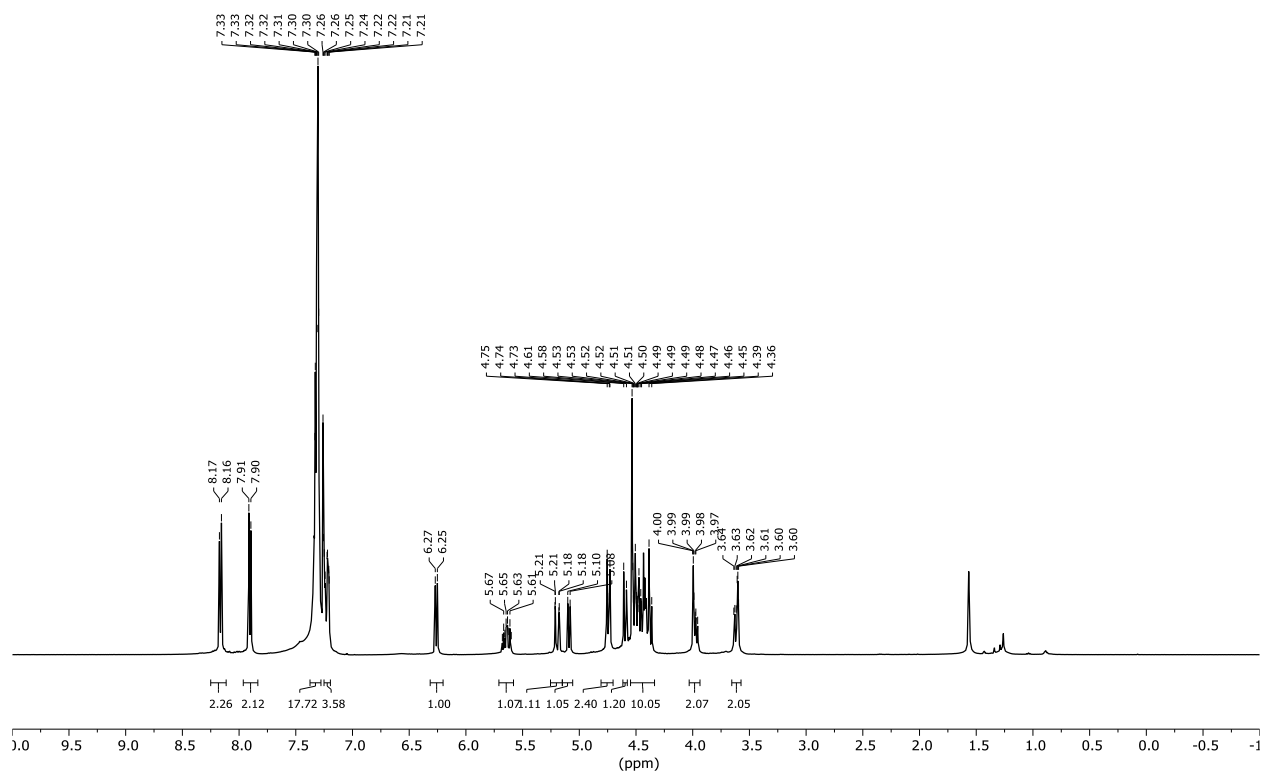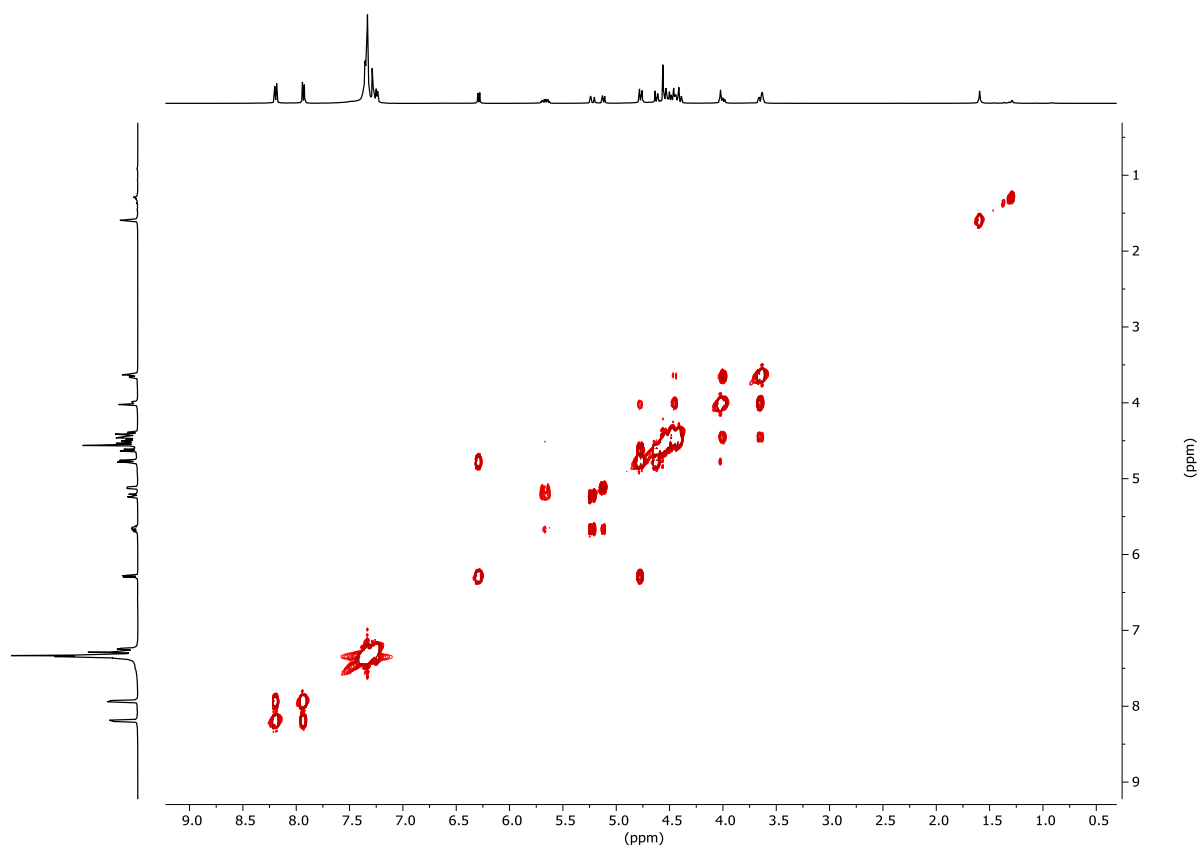

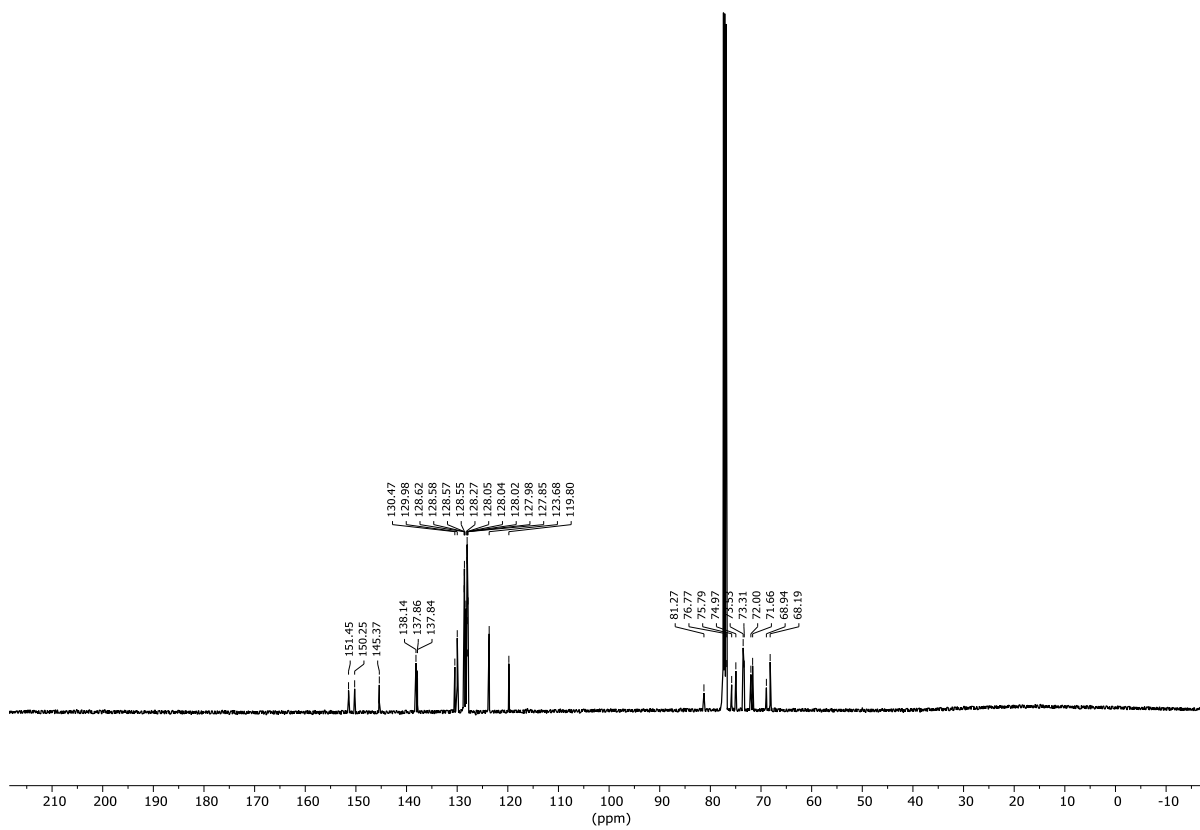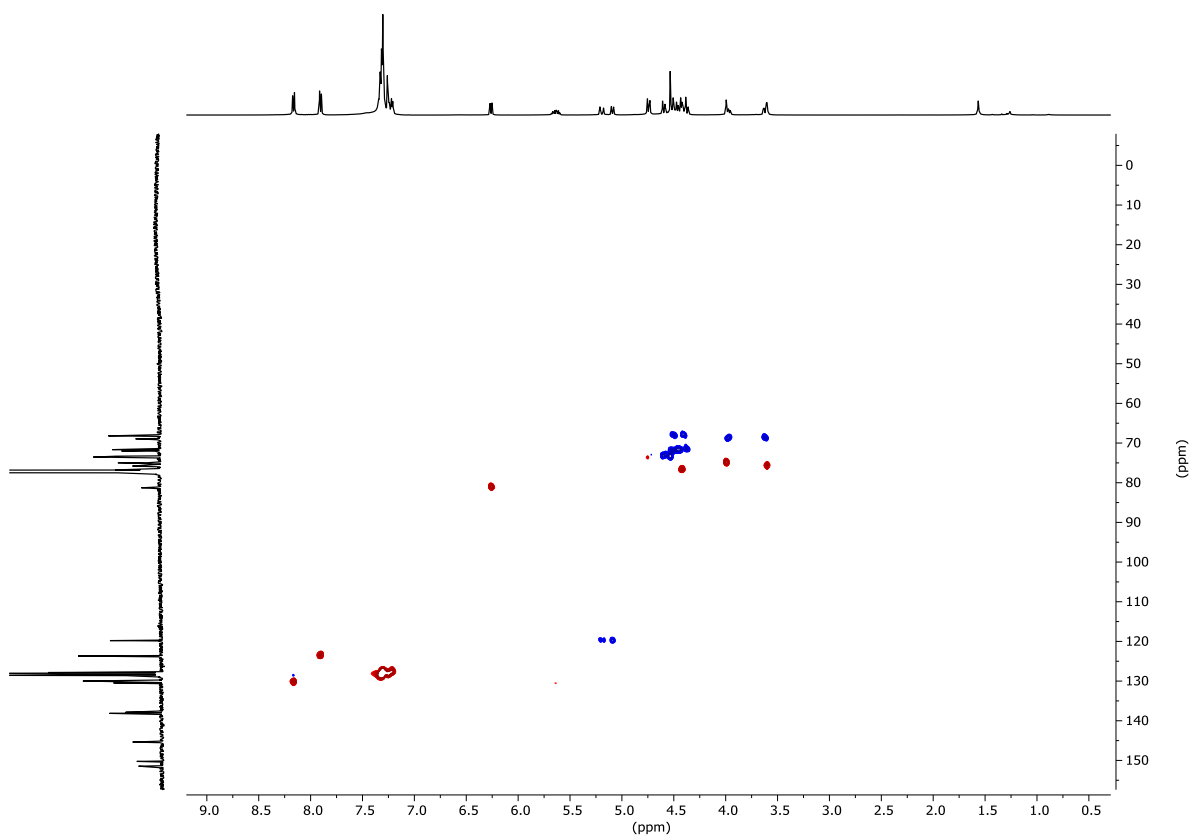

Compound S24

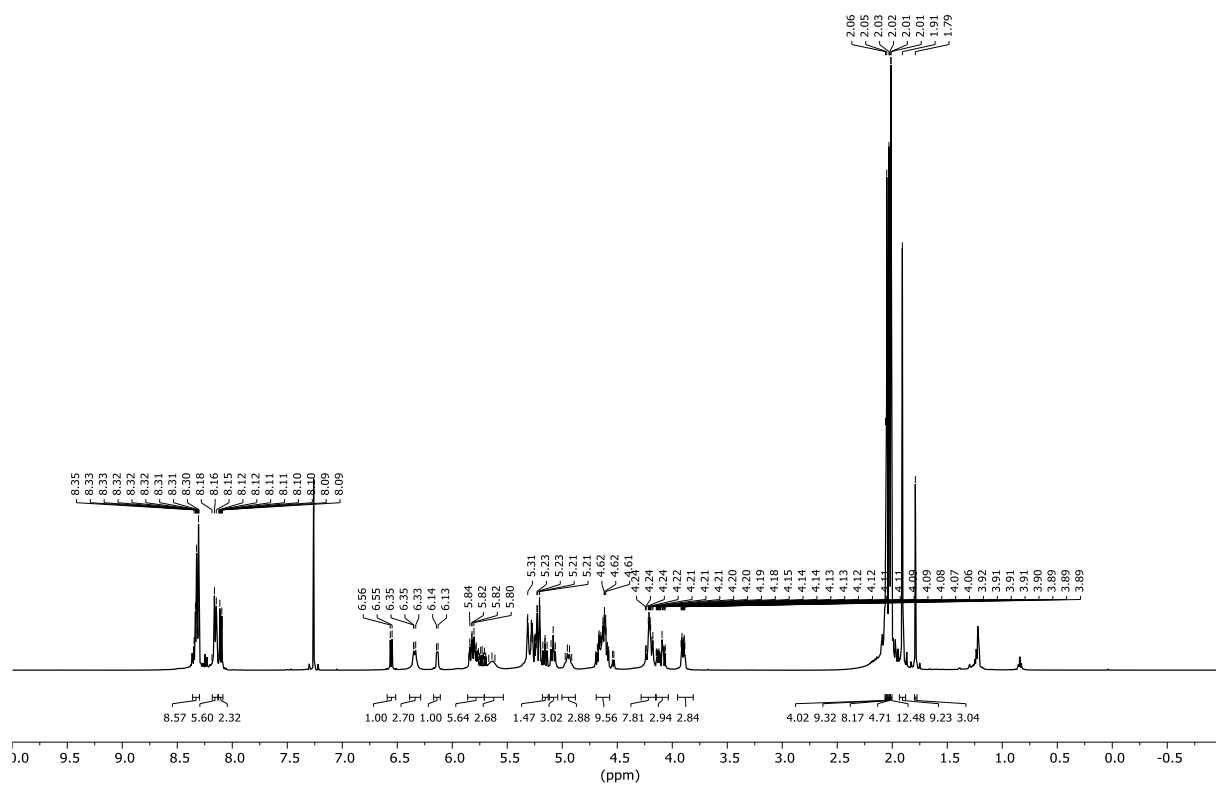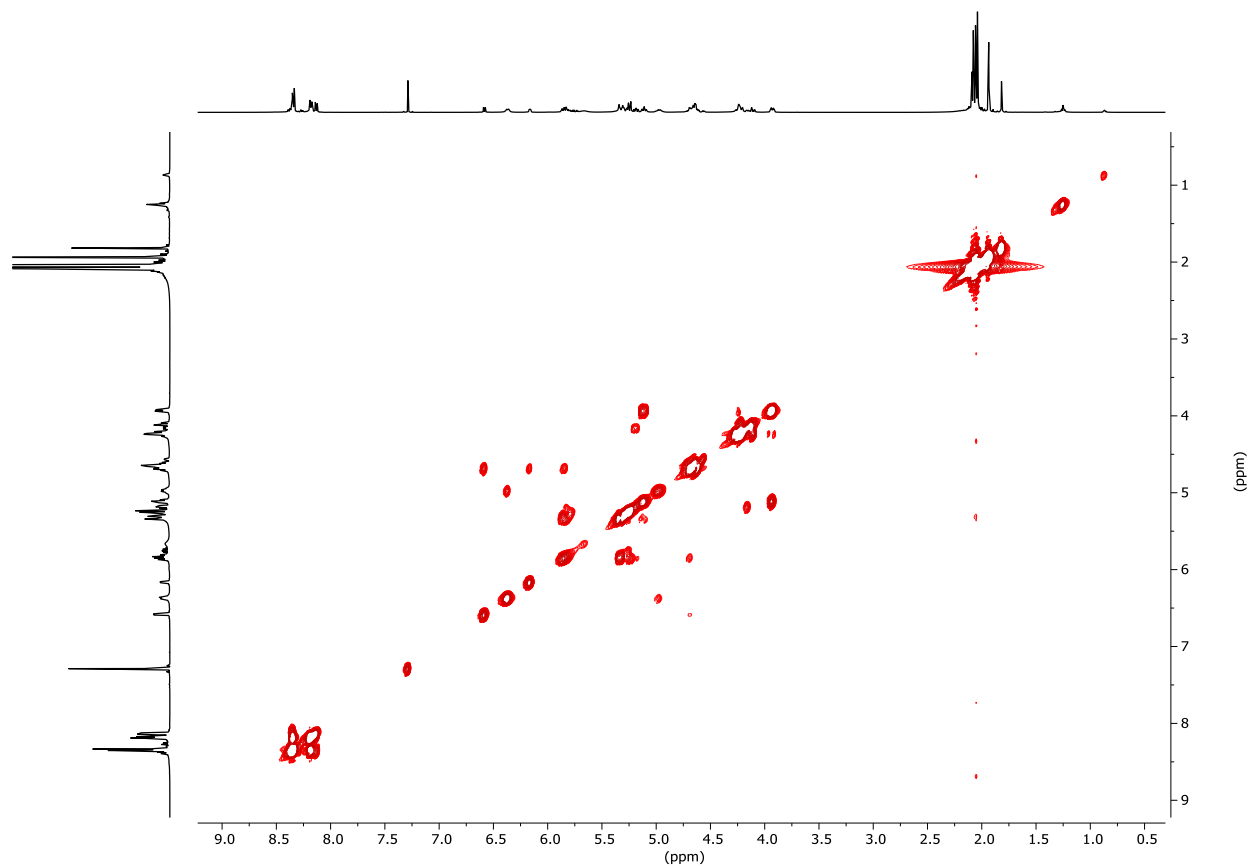



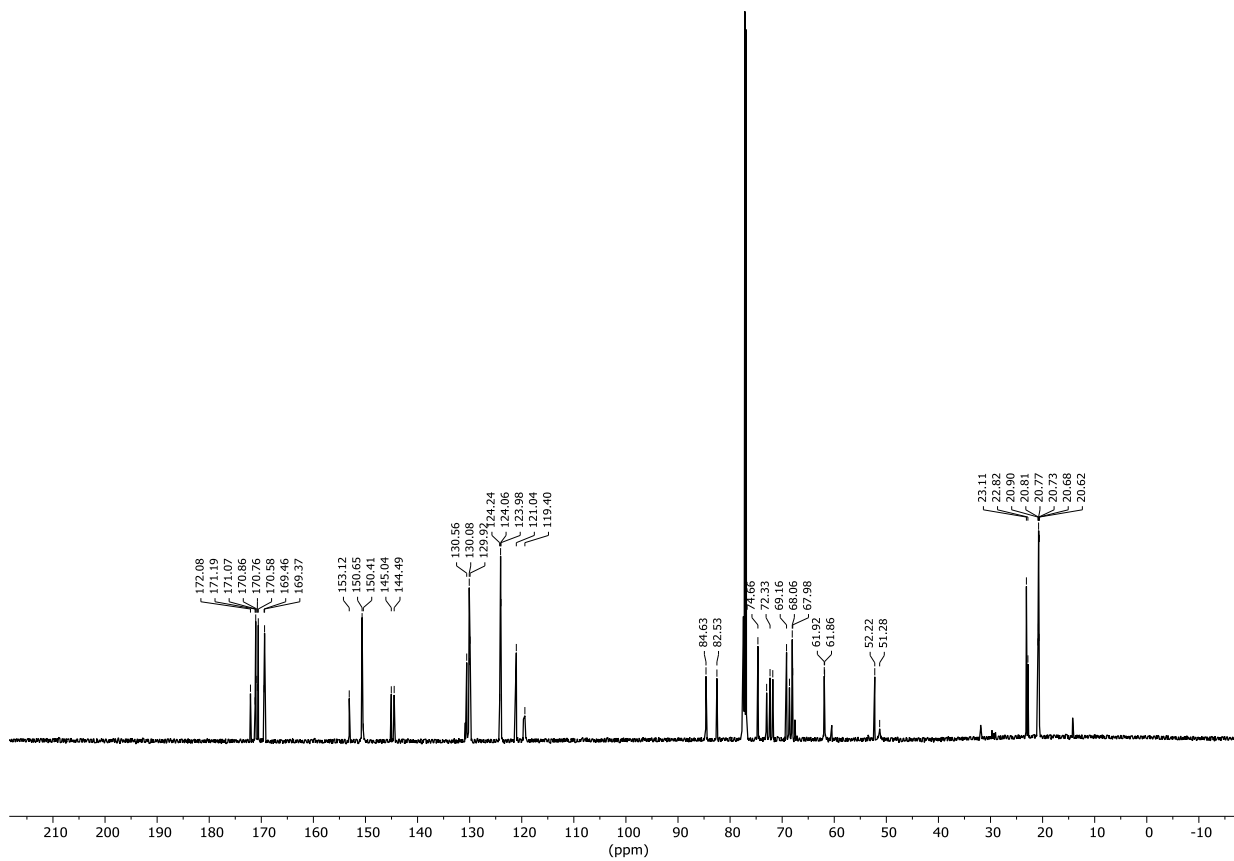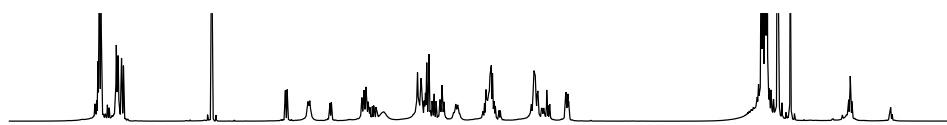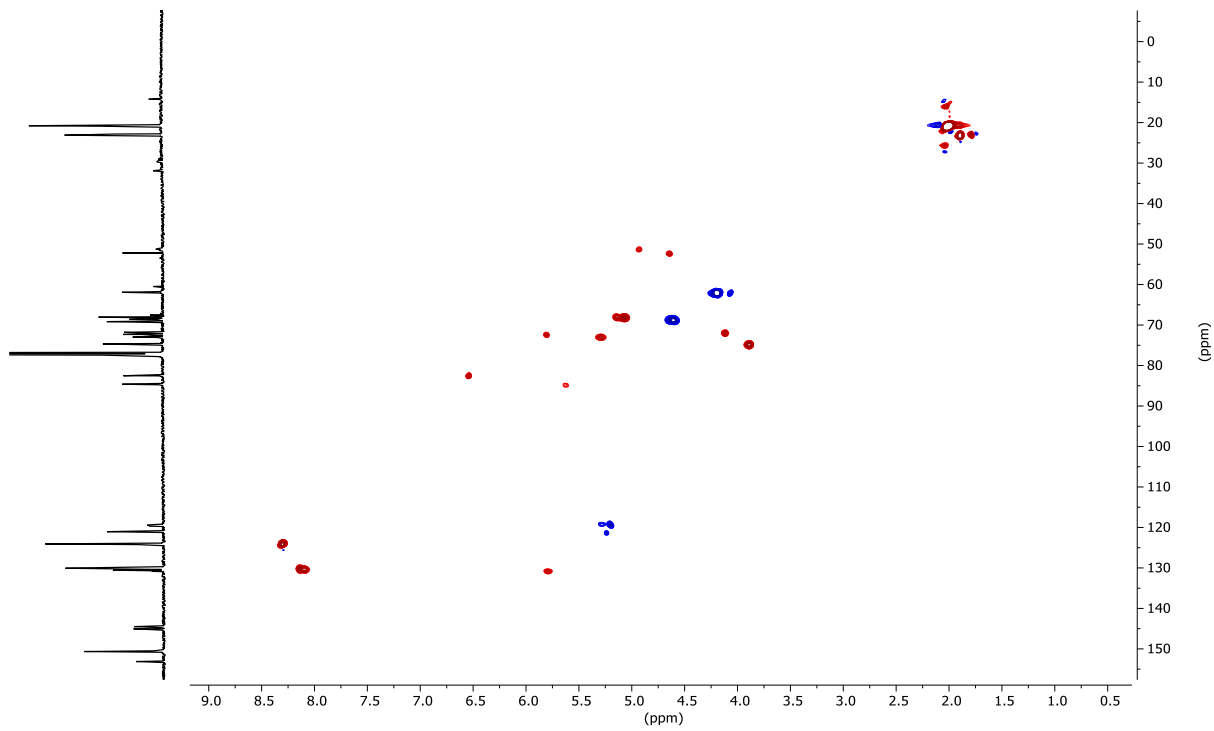

Compound S25

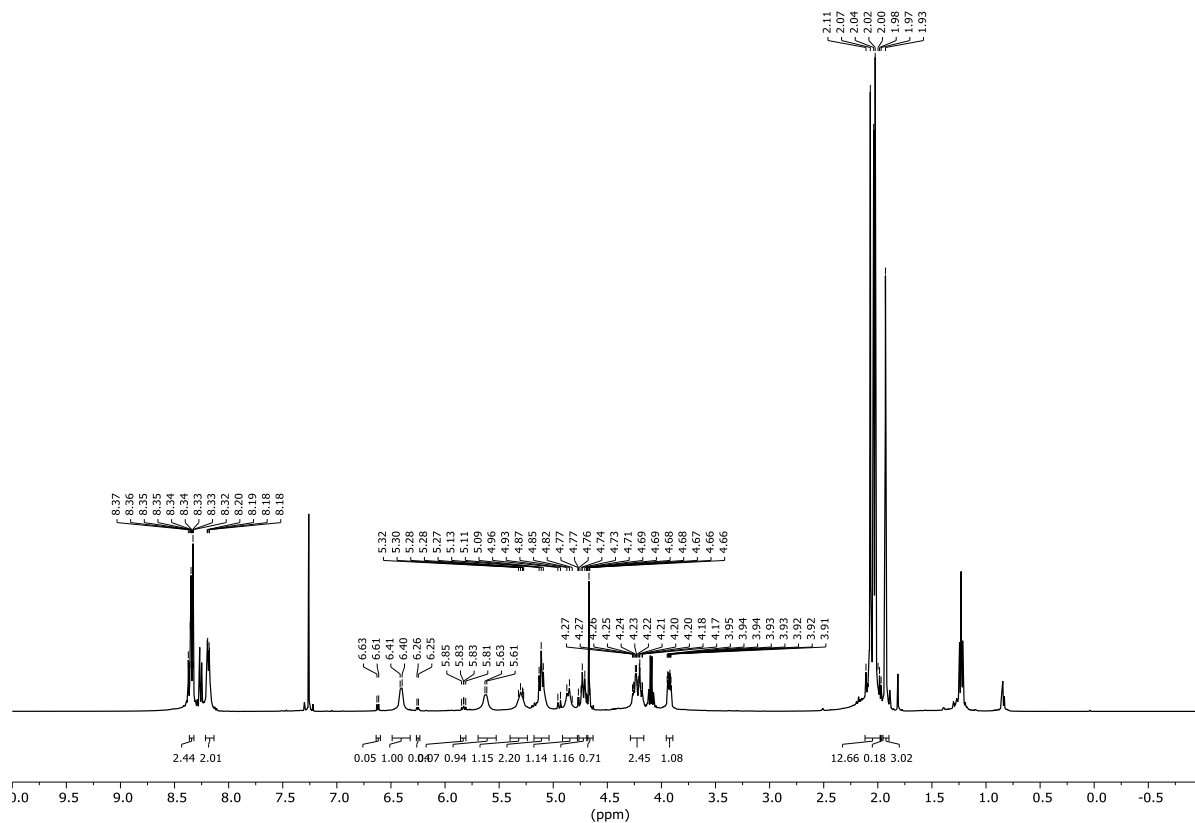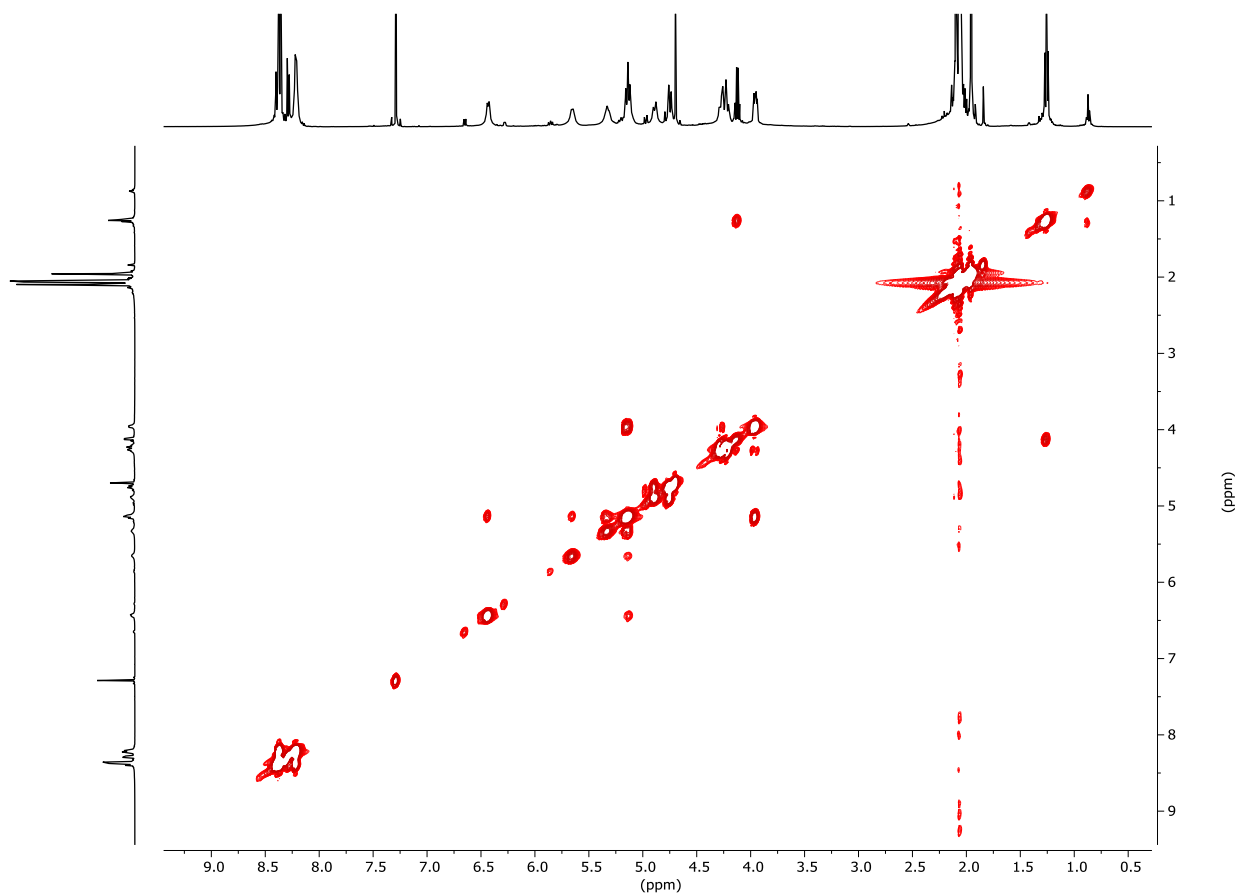

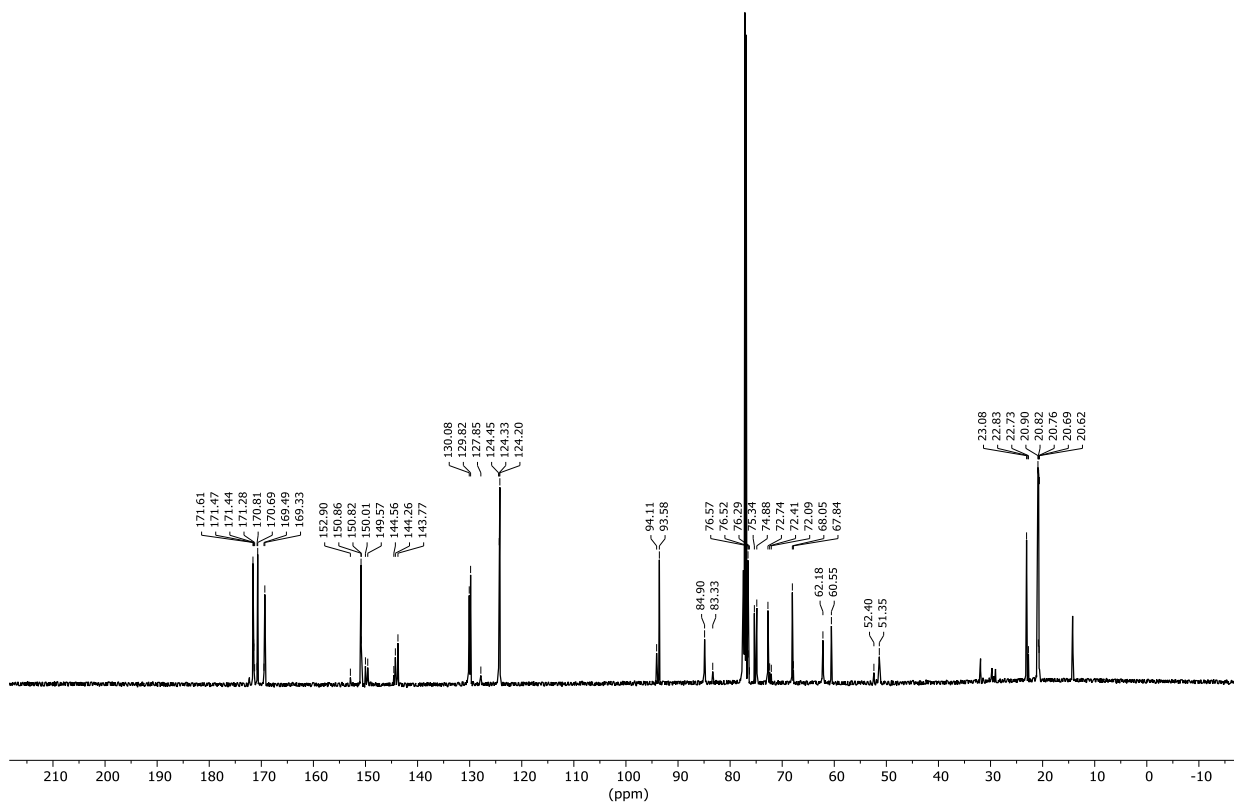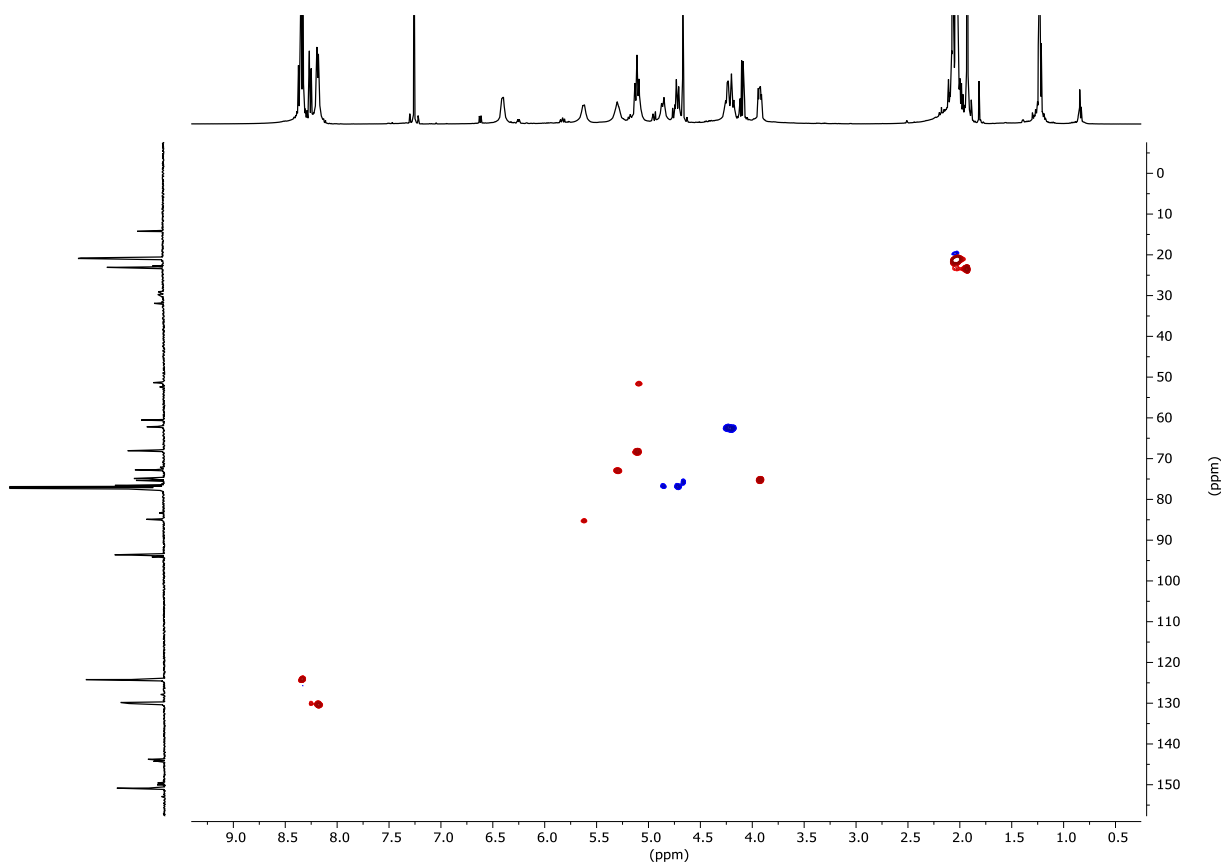

Compound S26 $\alpha$

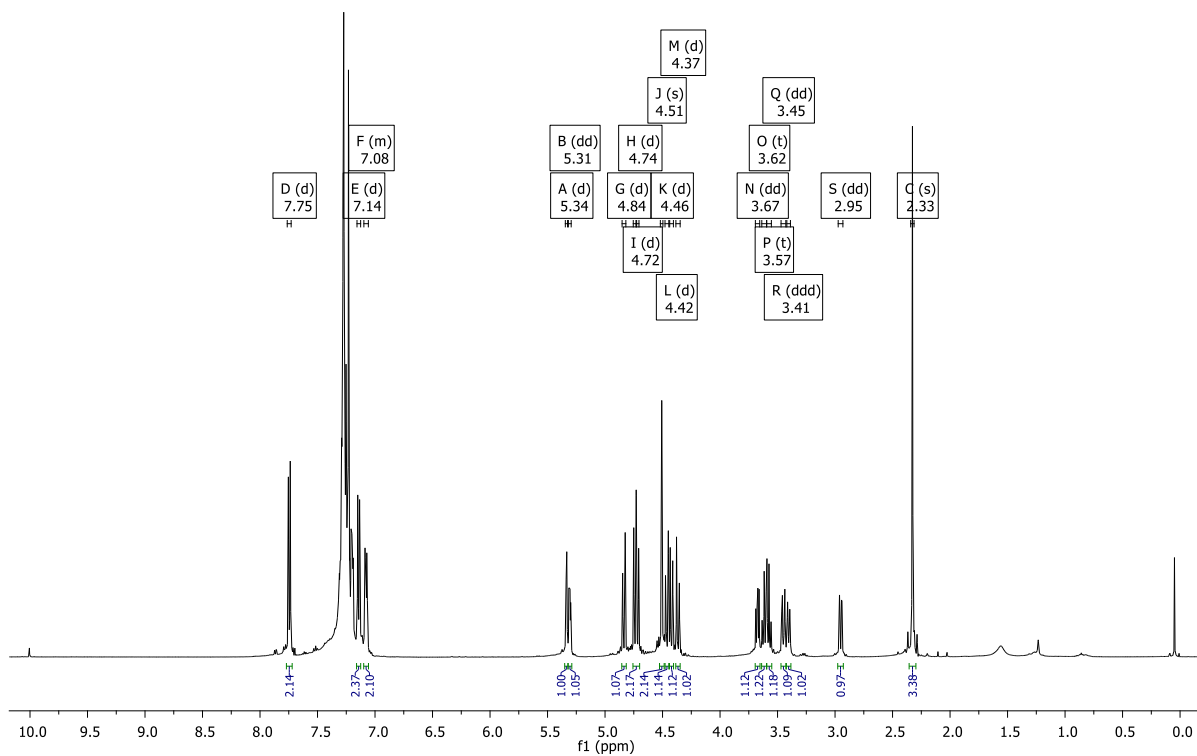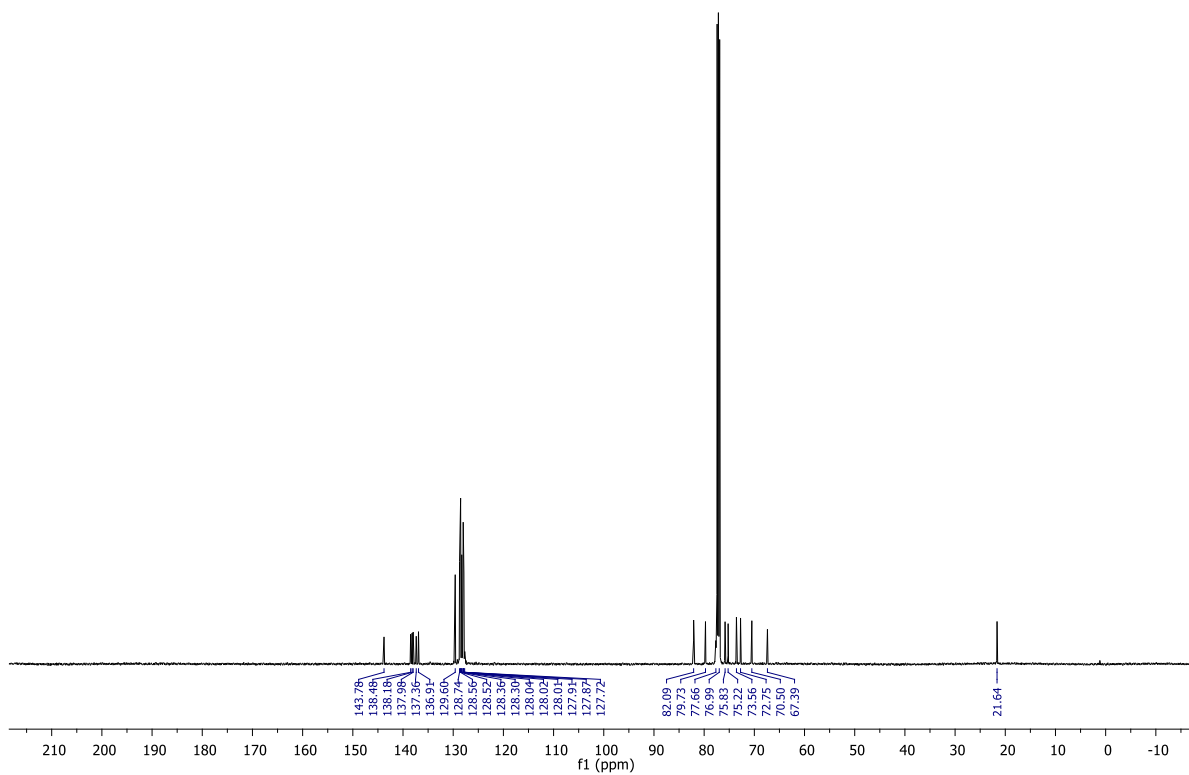

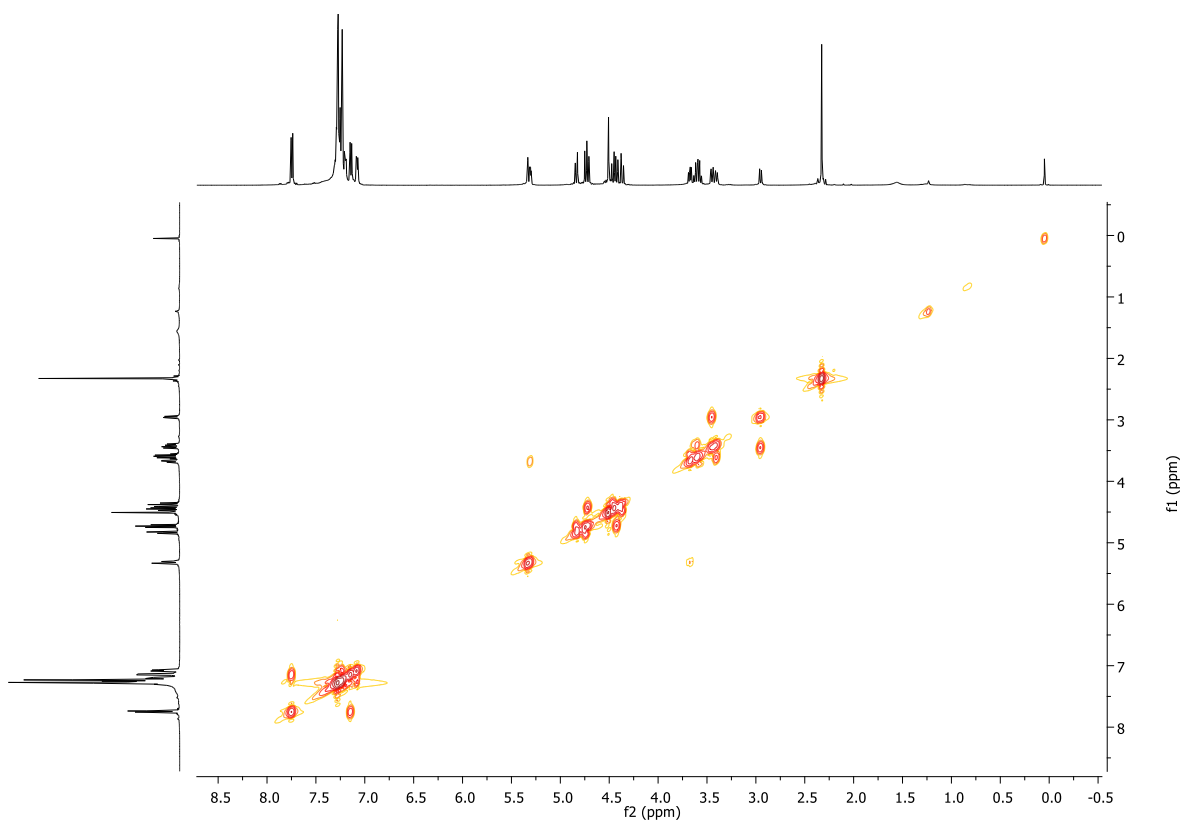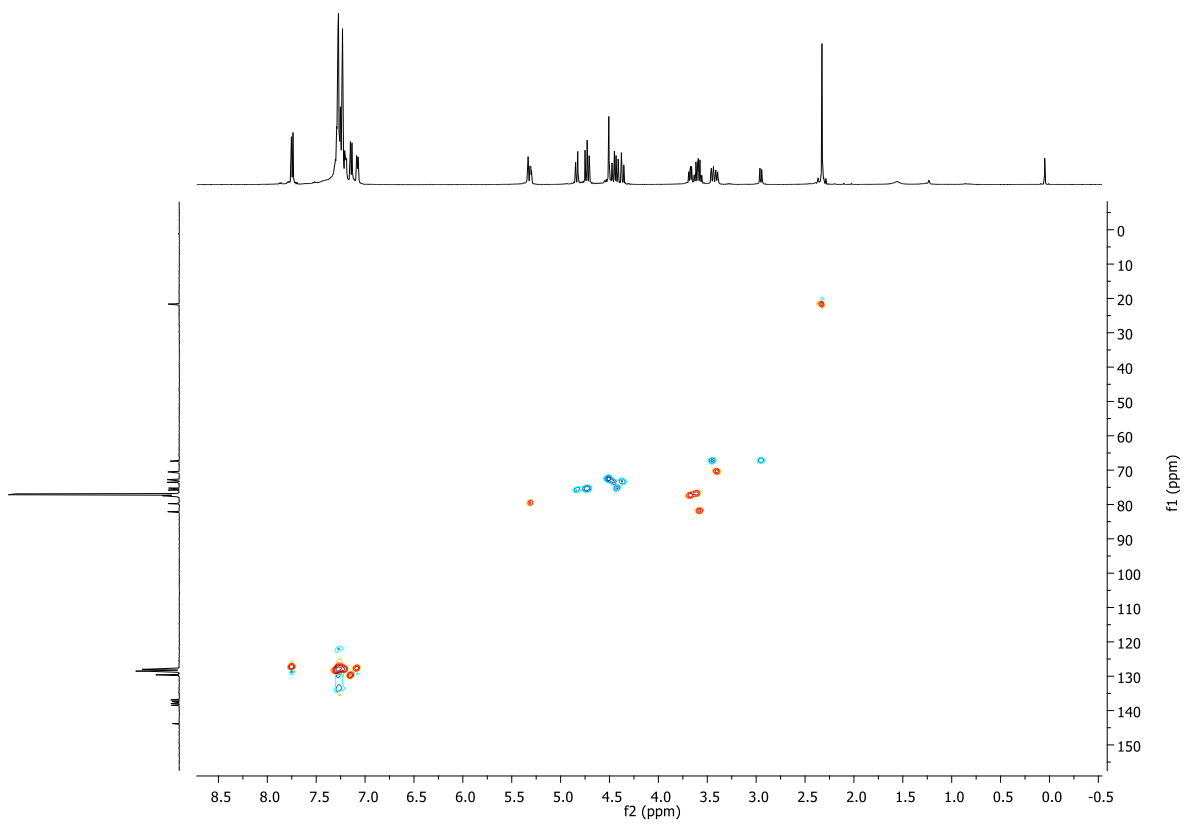

Compound S26 $\beta$

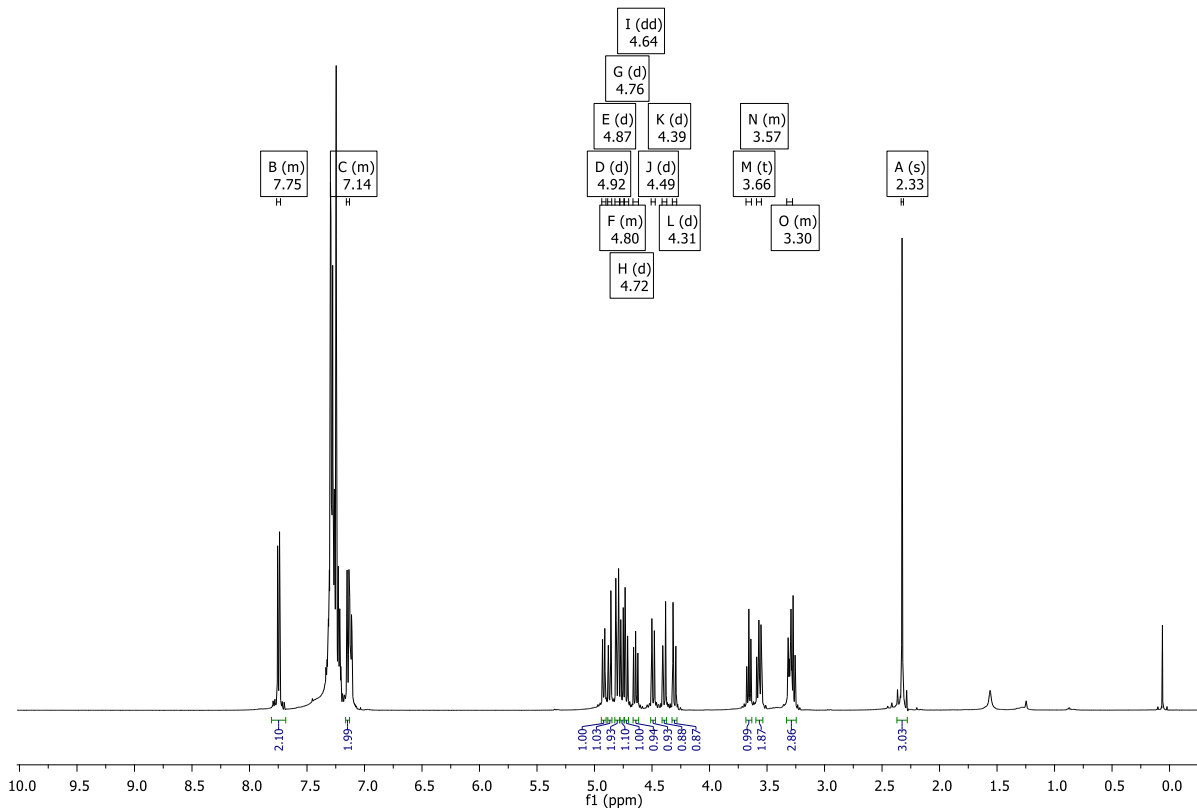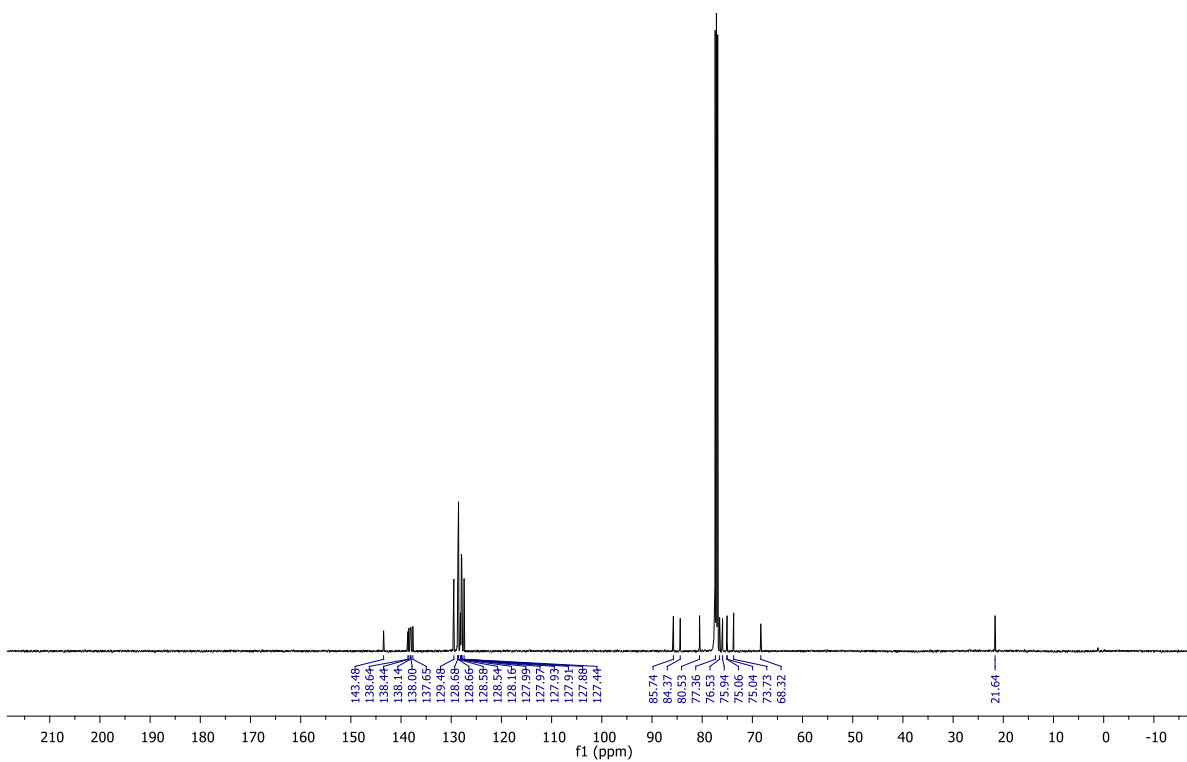

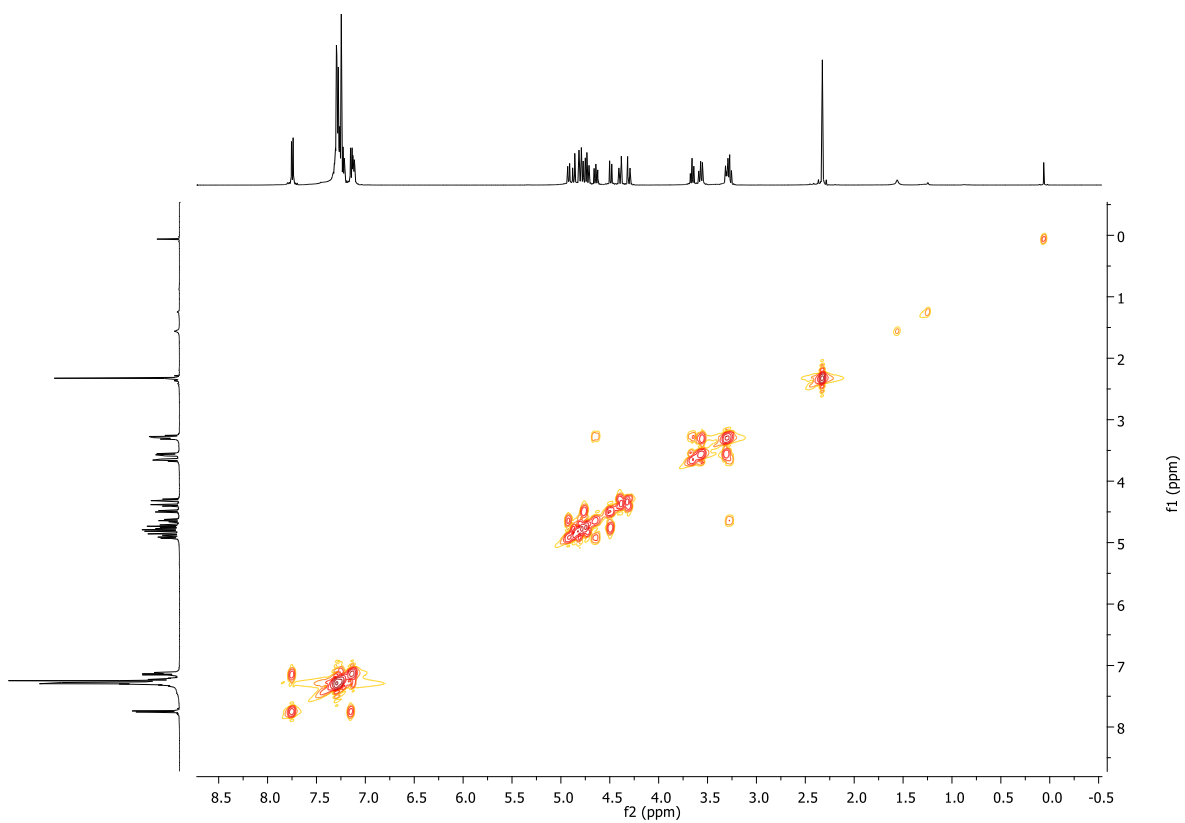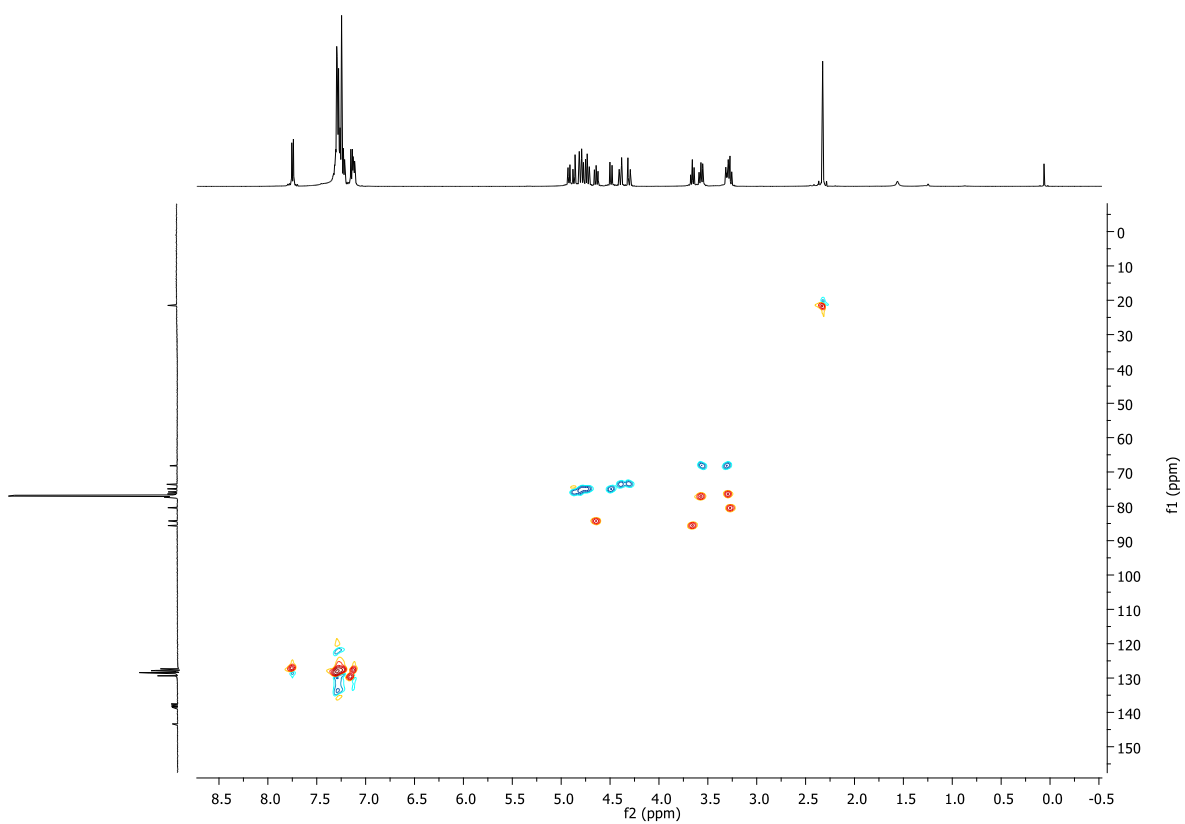

Compound S27

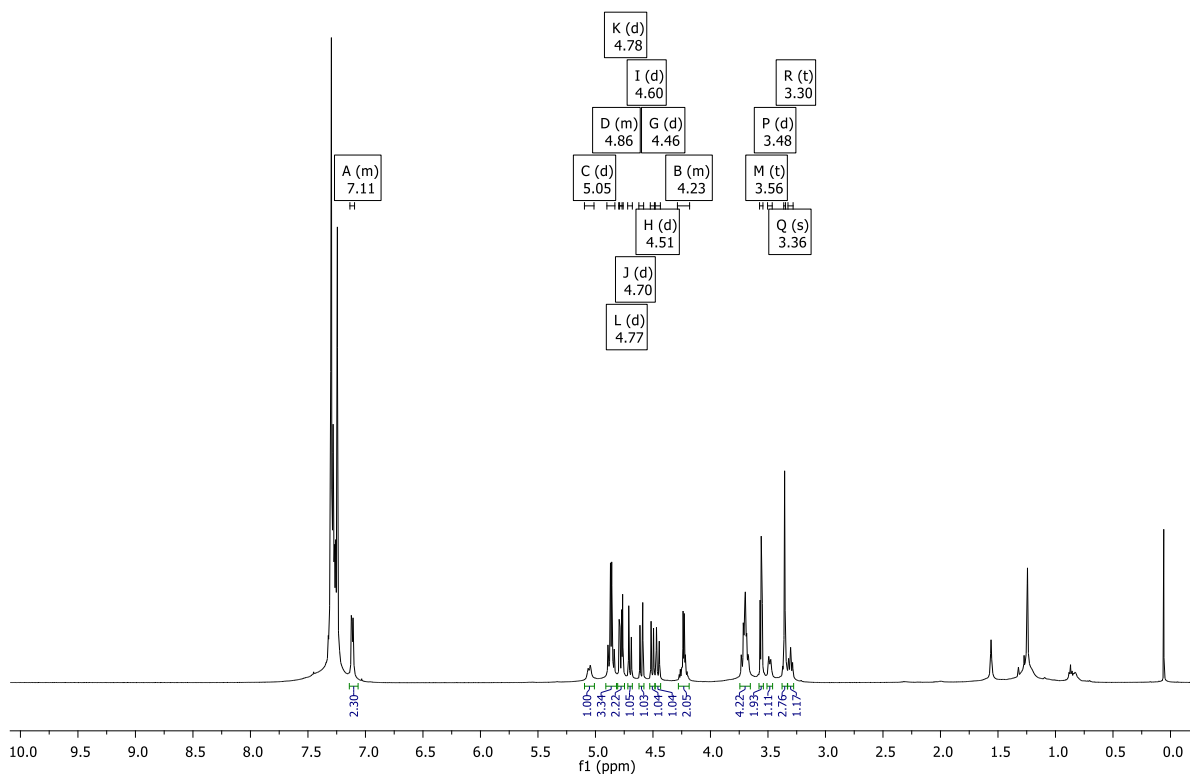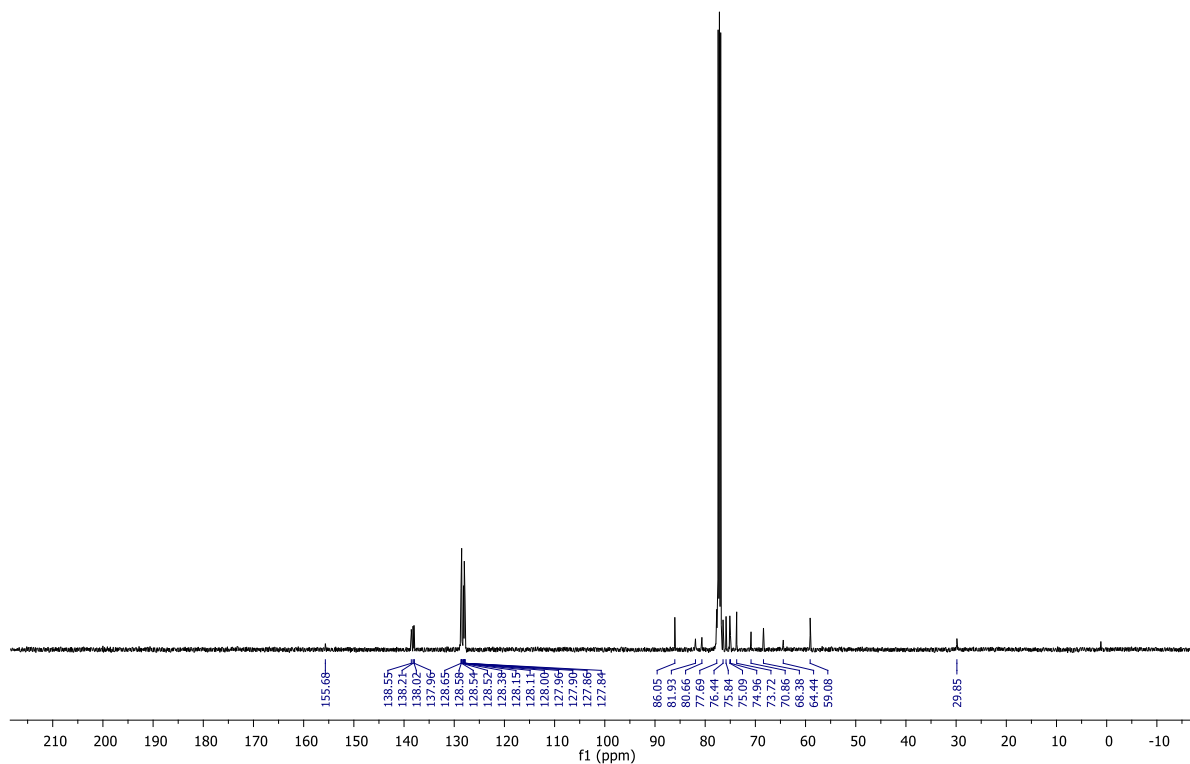



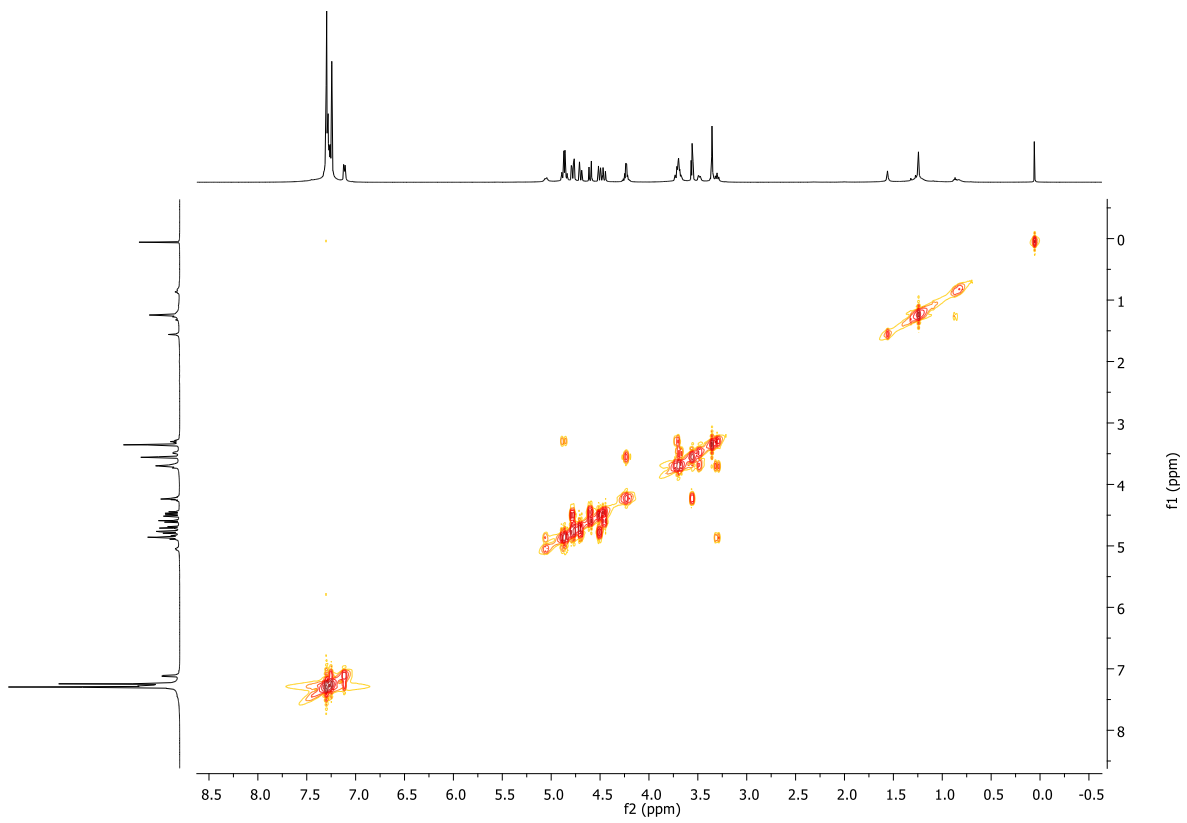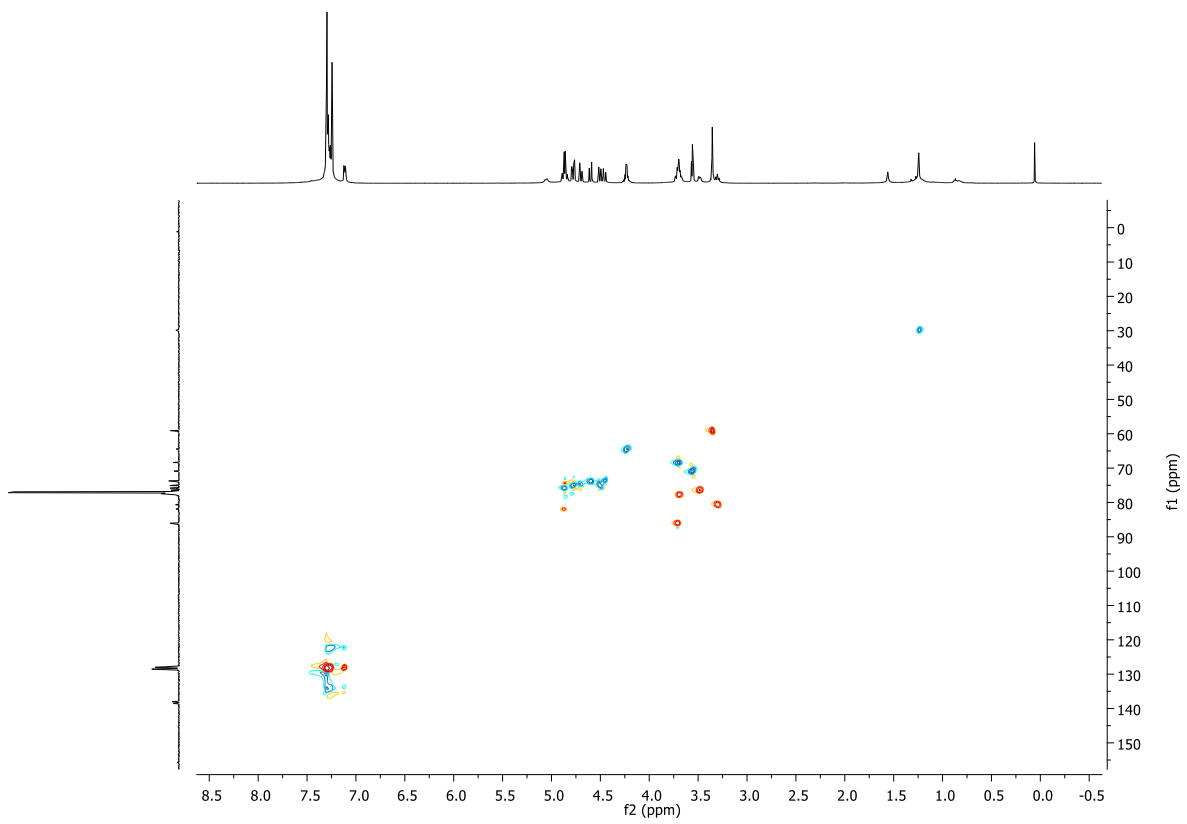

Compound S28

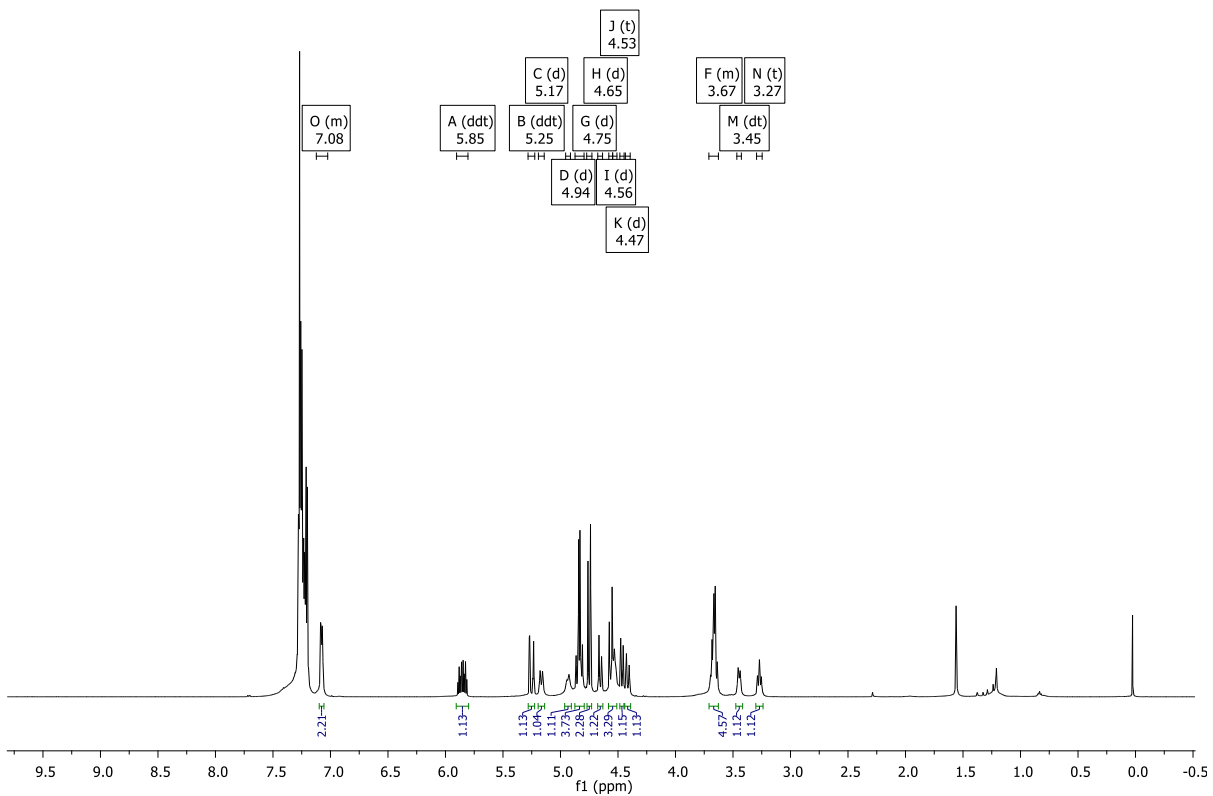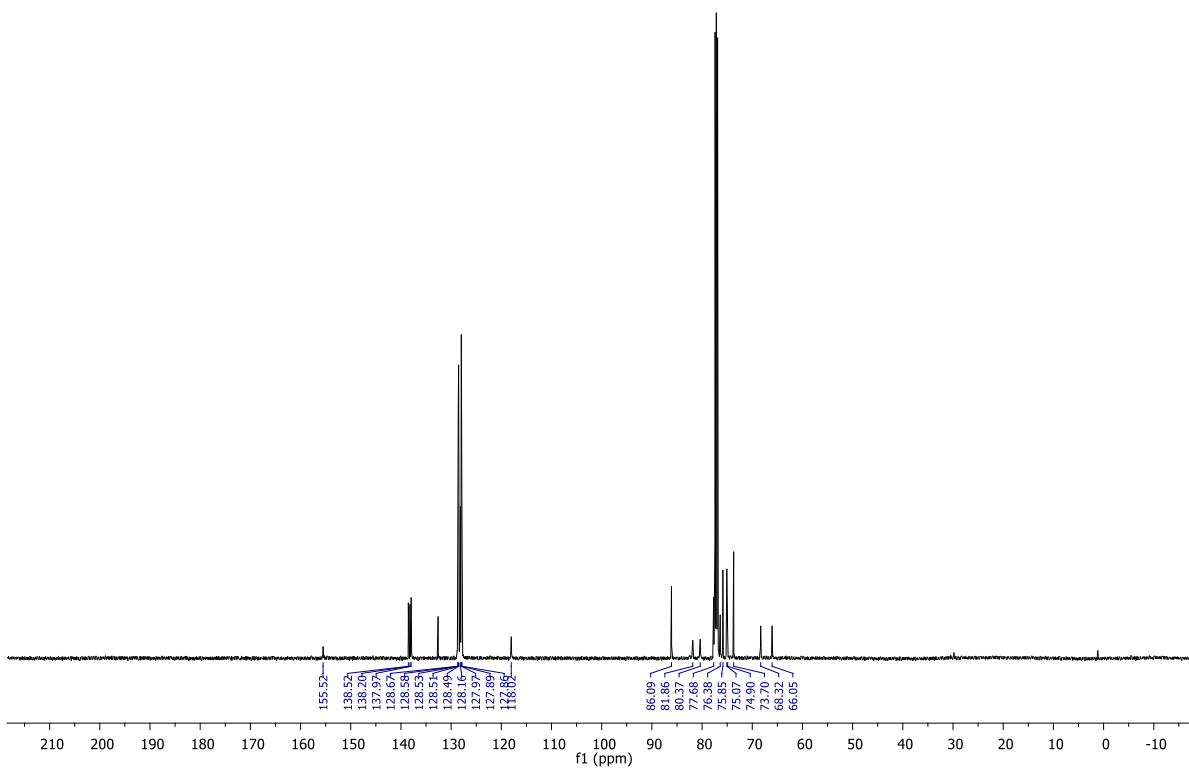

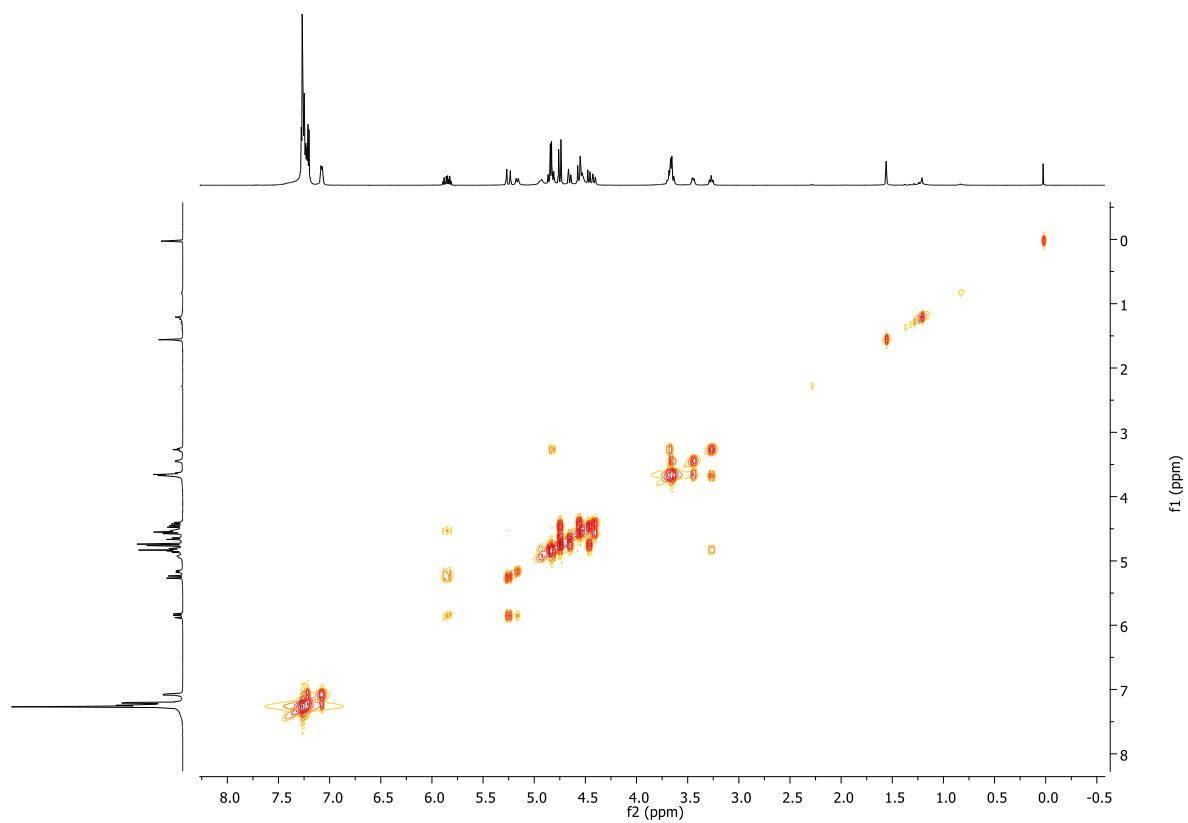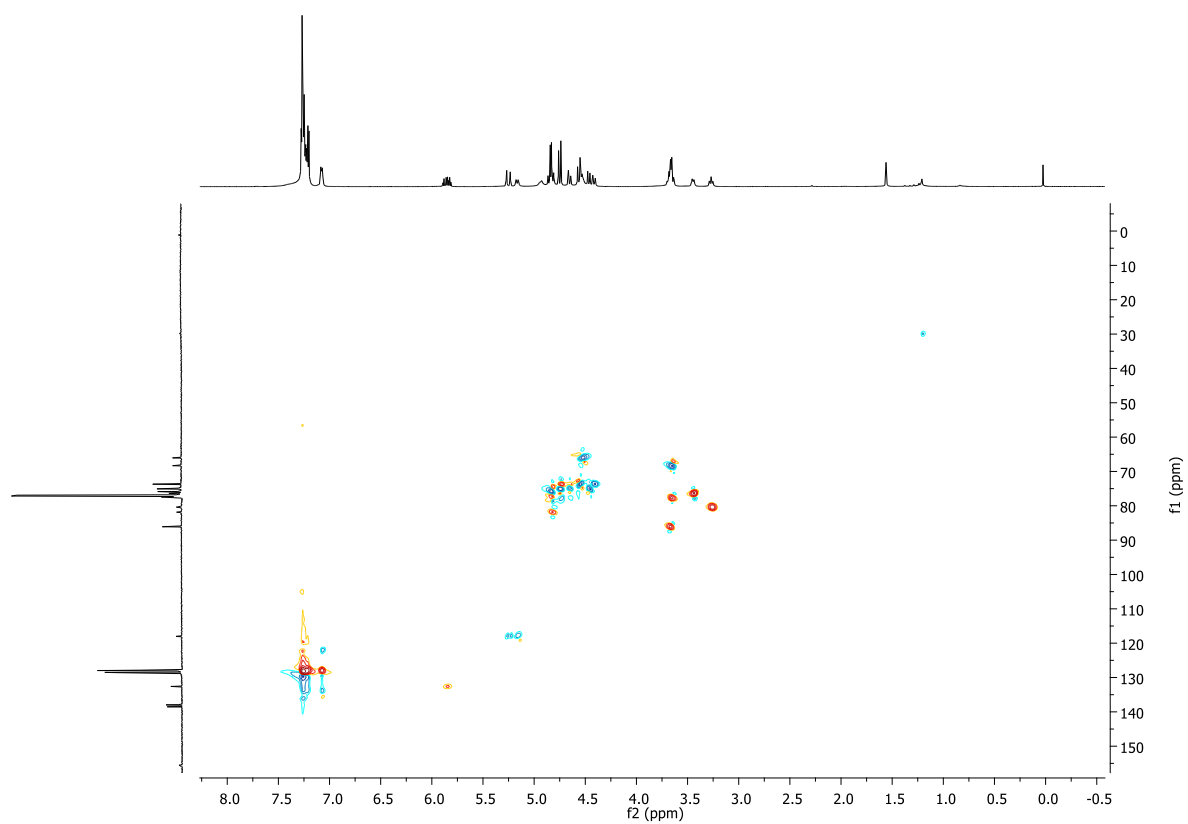

Compound S29

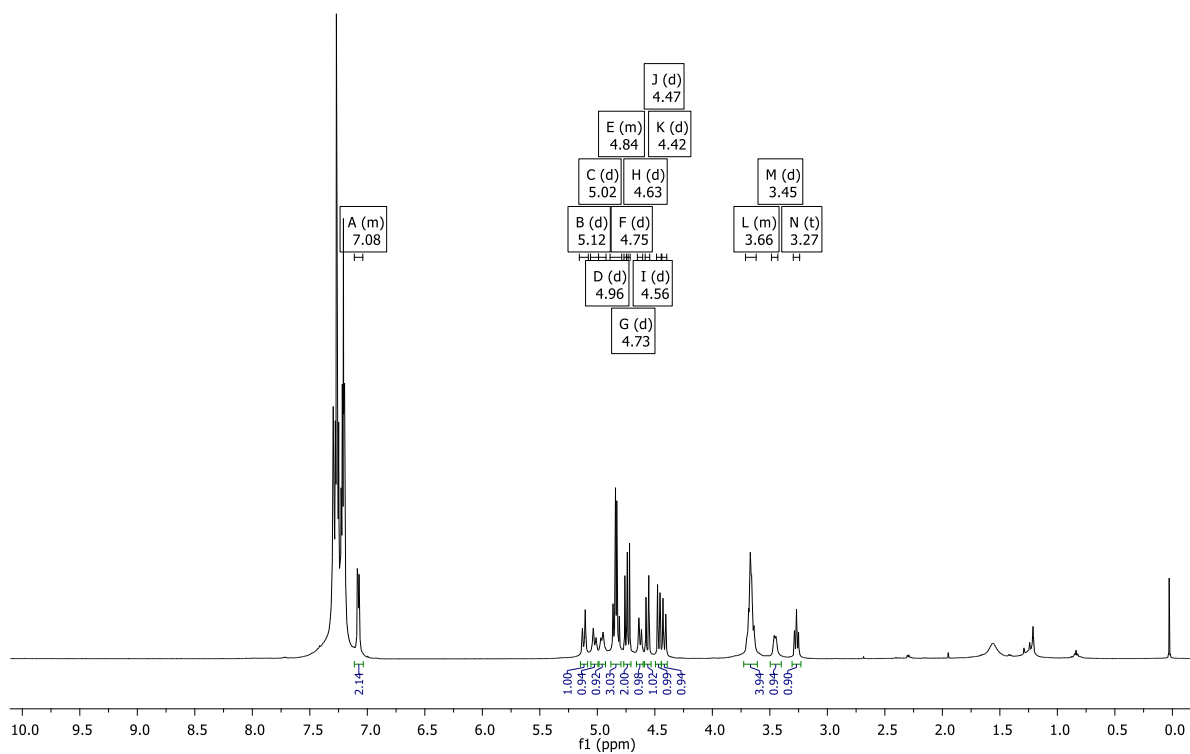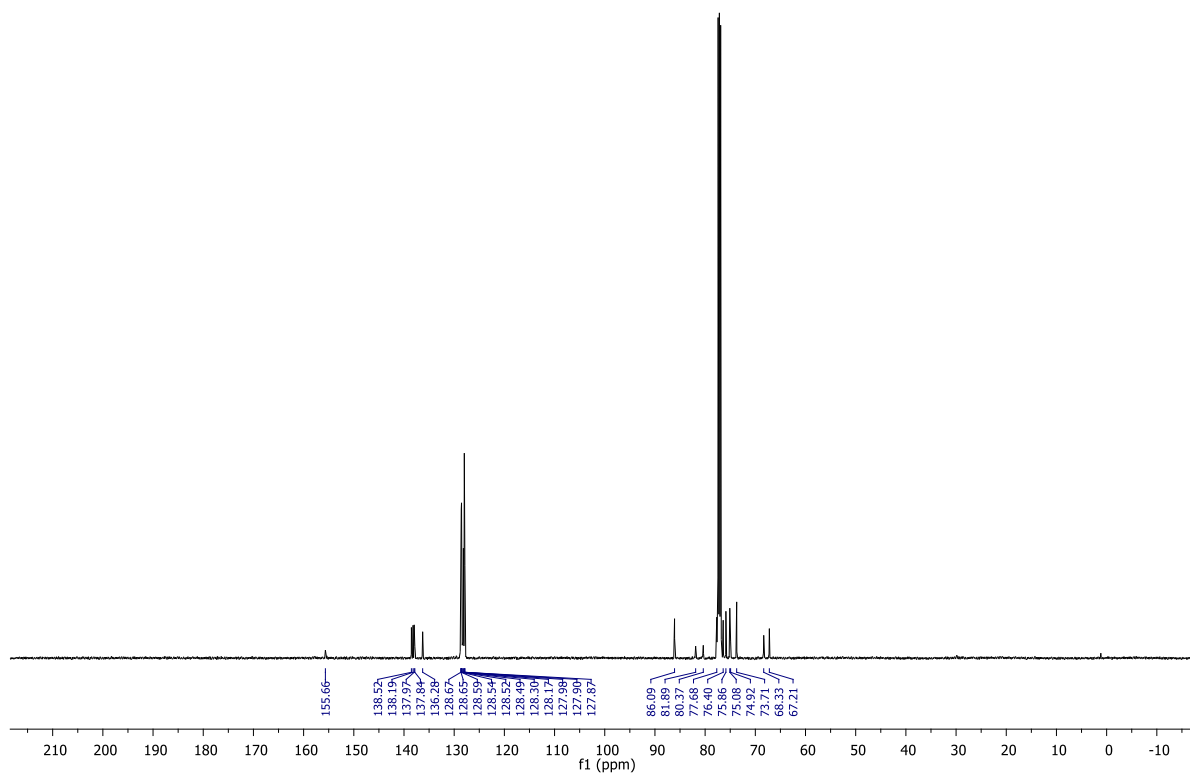

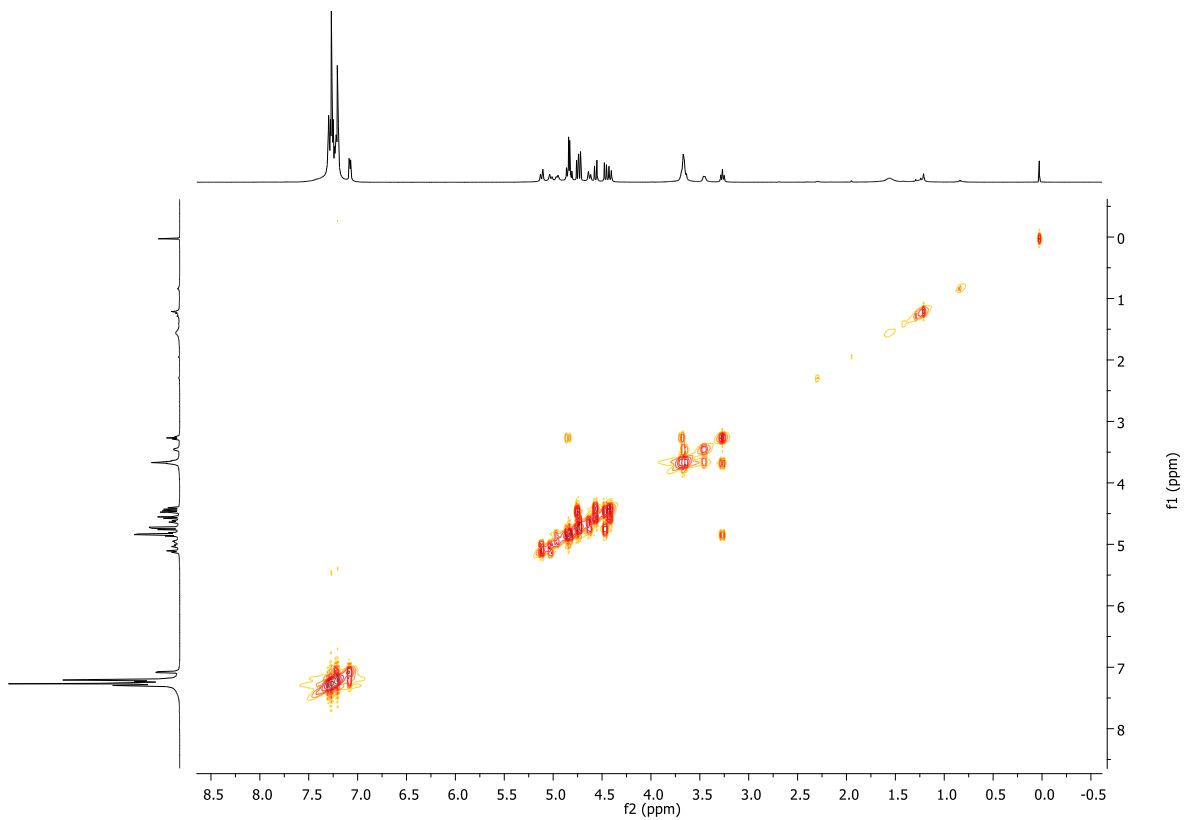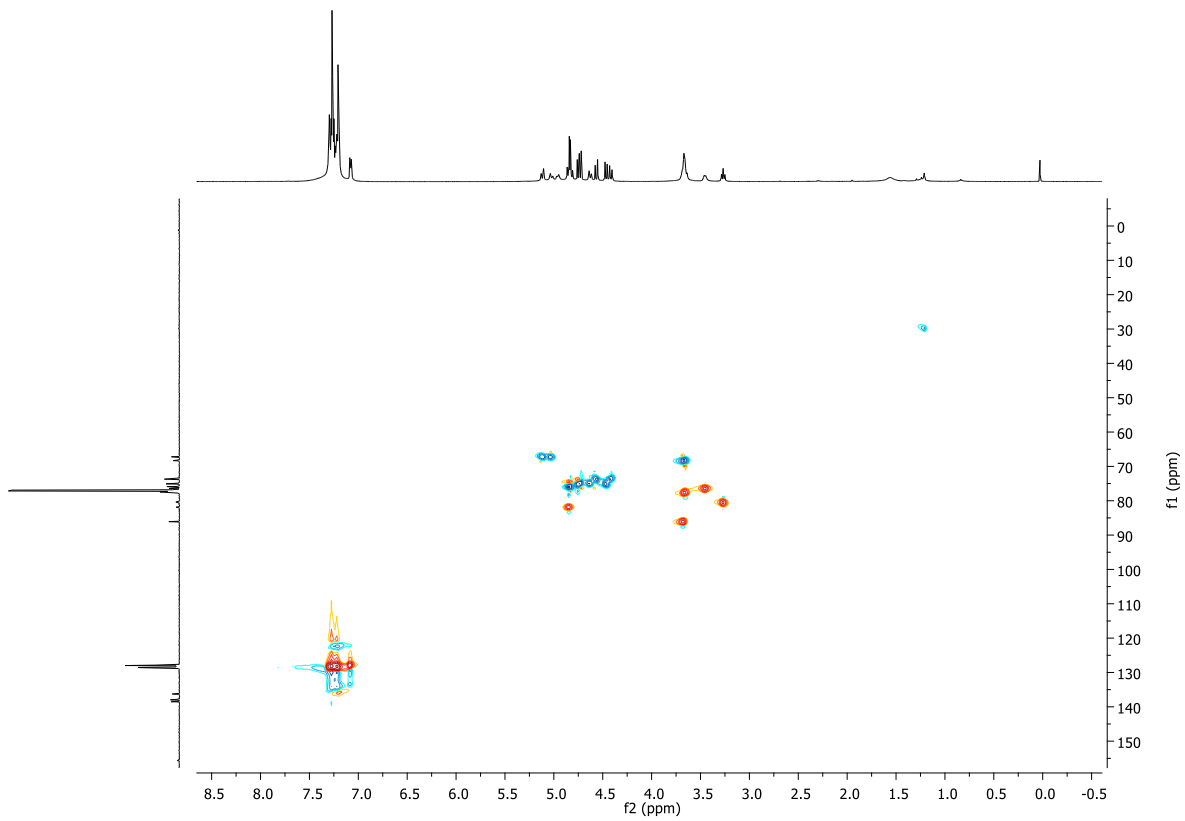

Compound S30

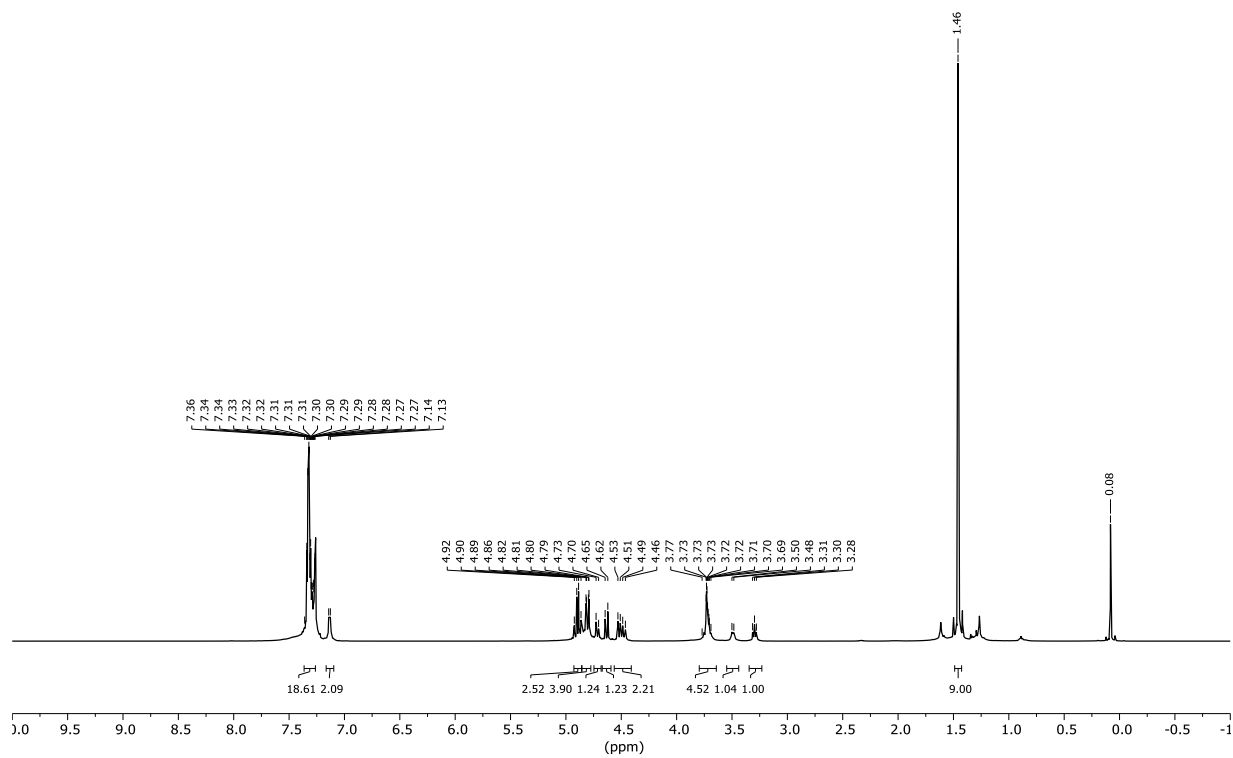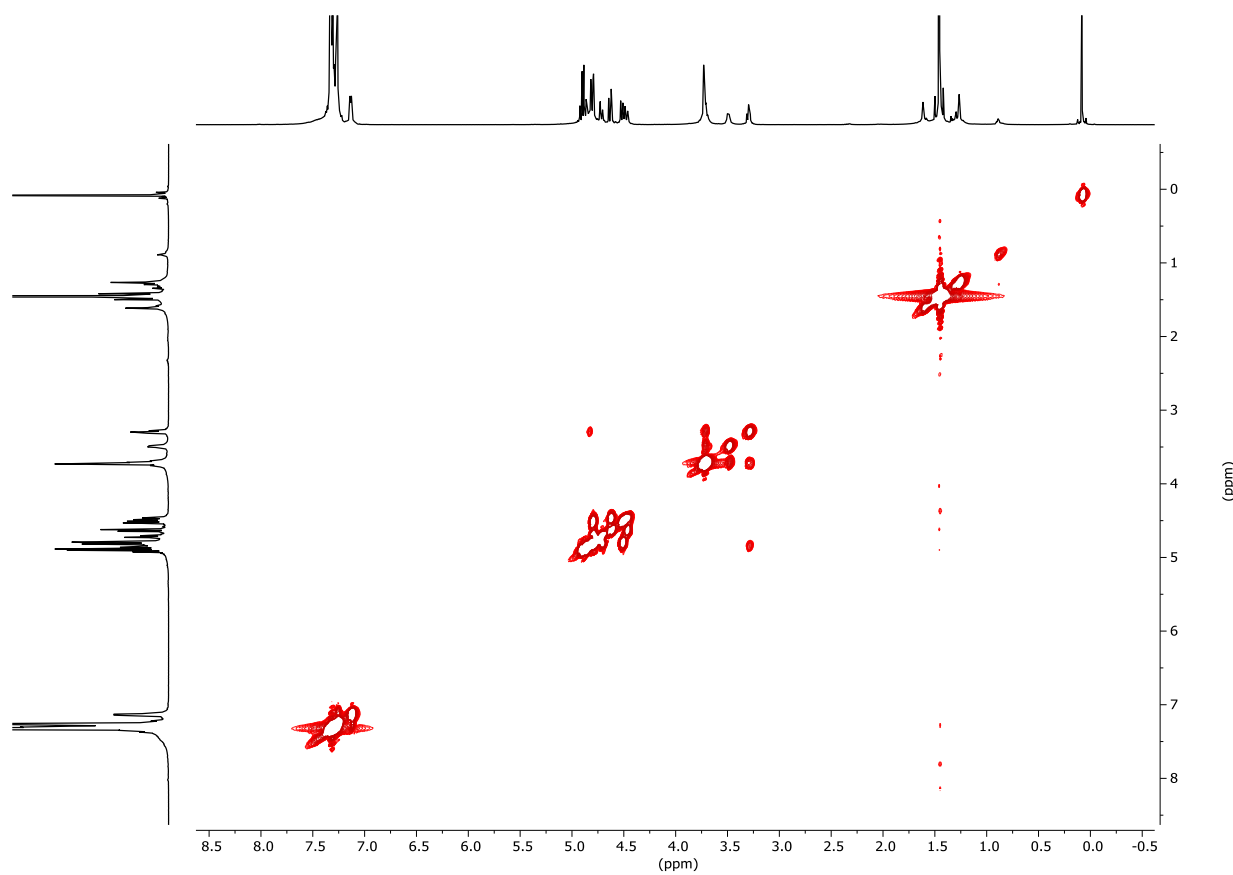

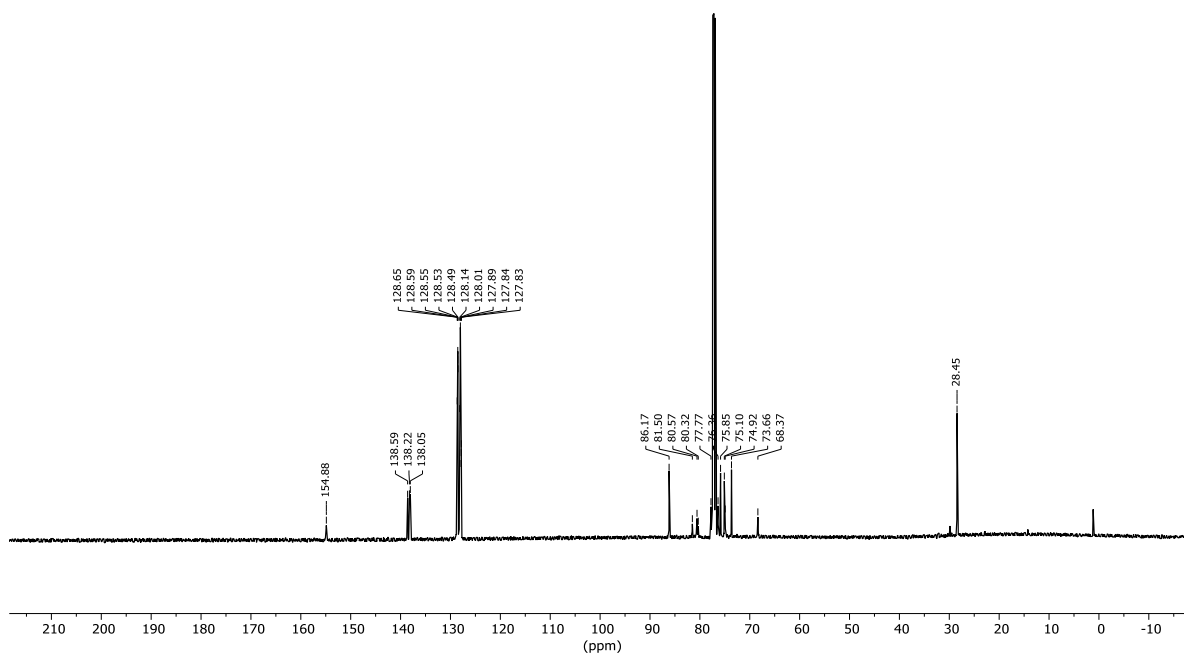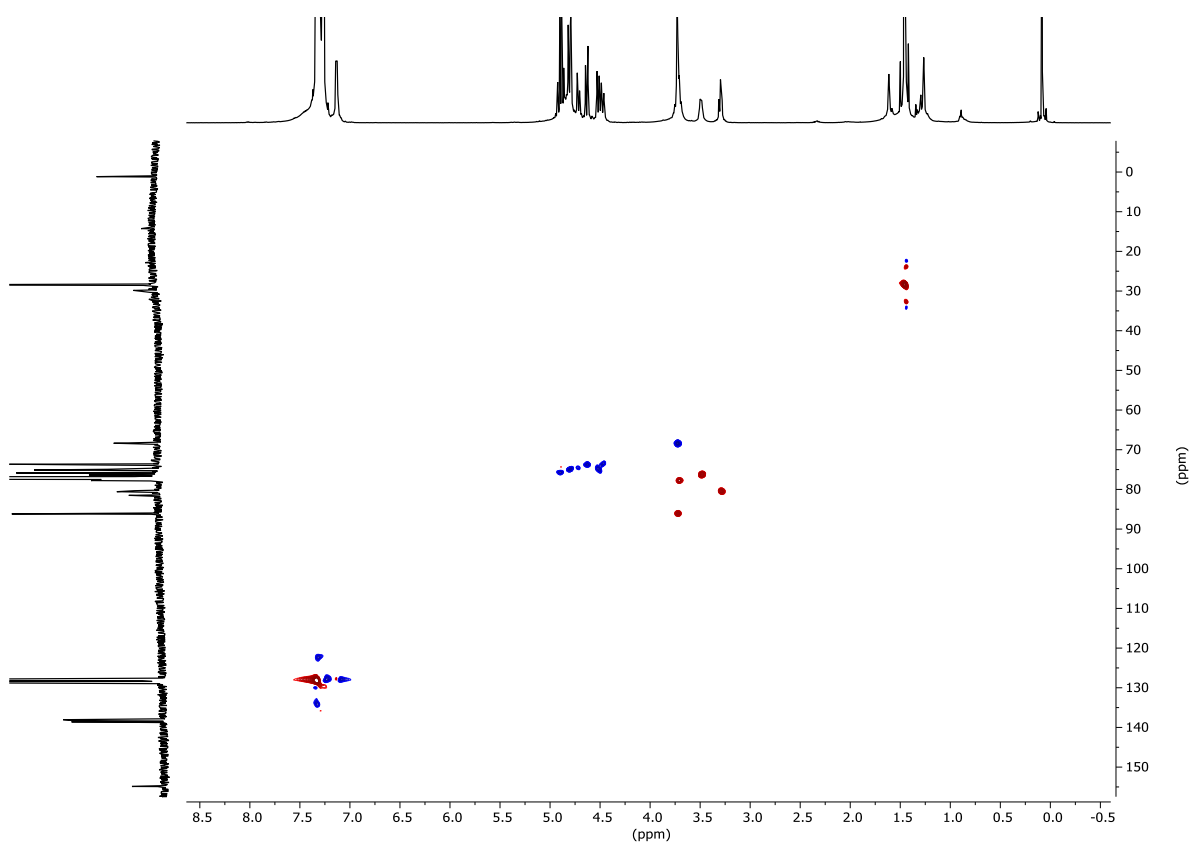

Compound S31

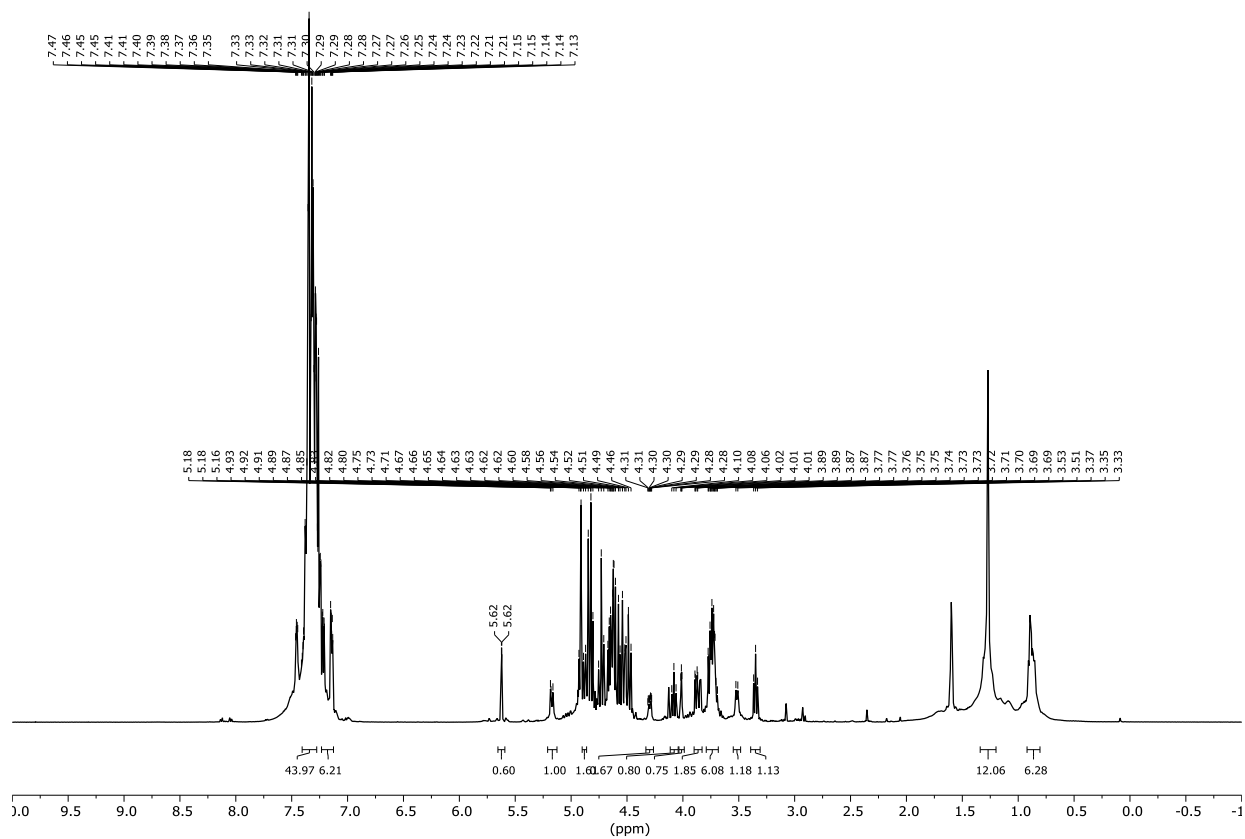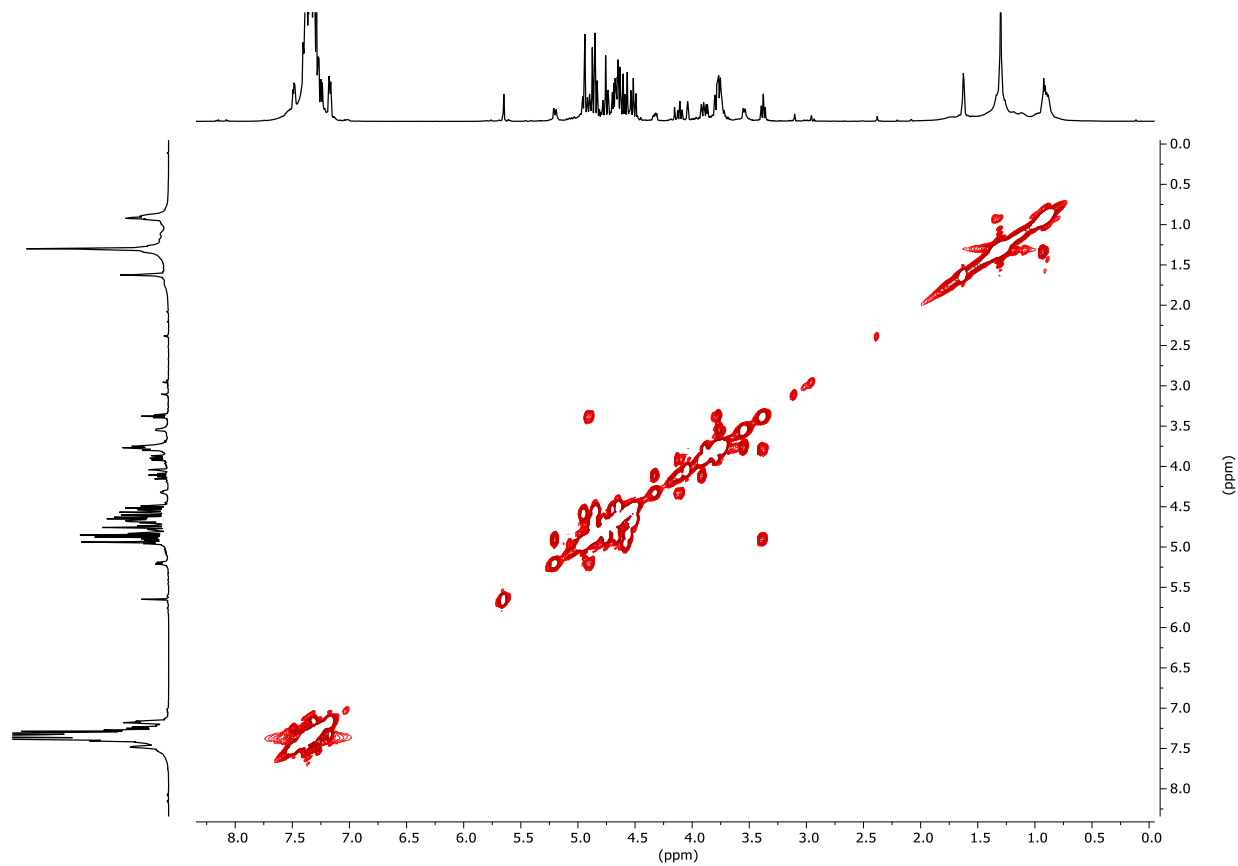



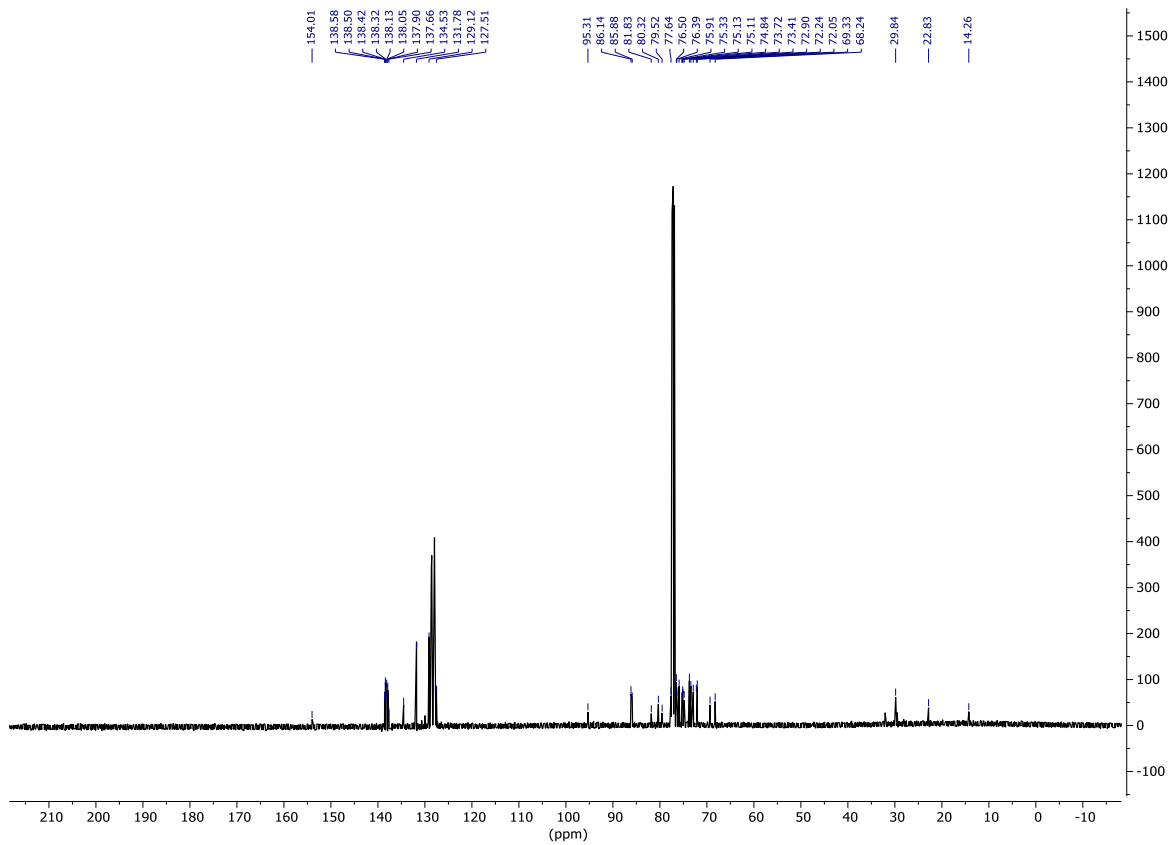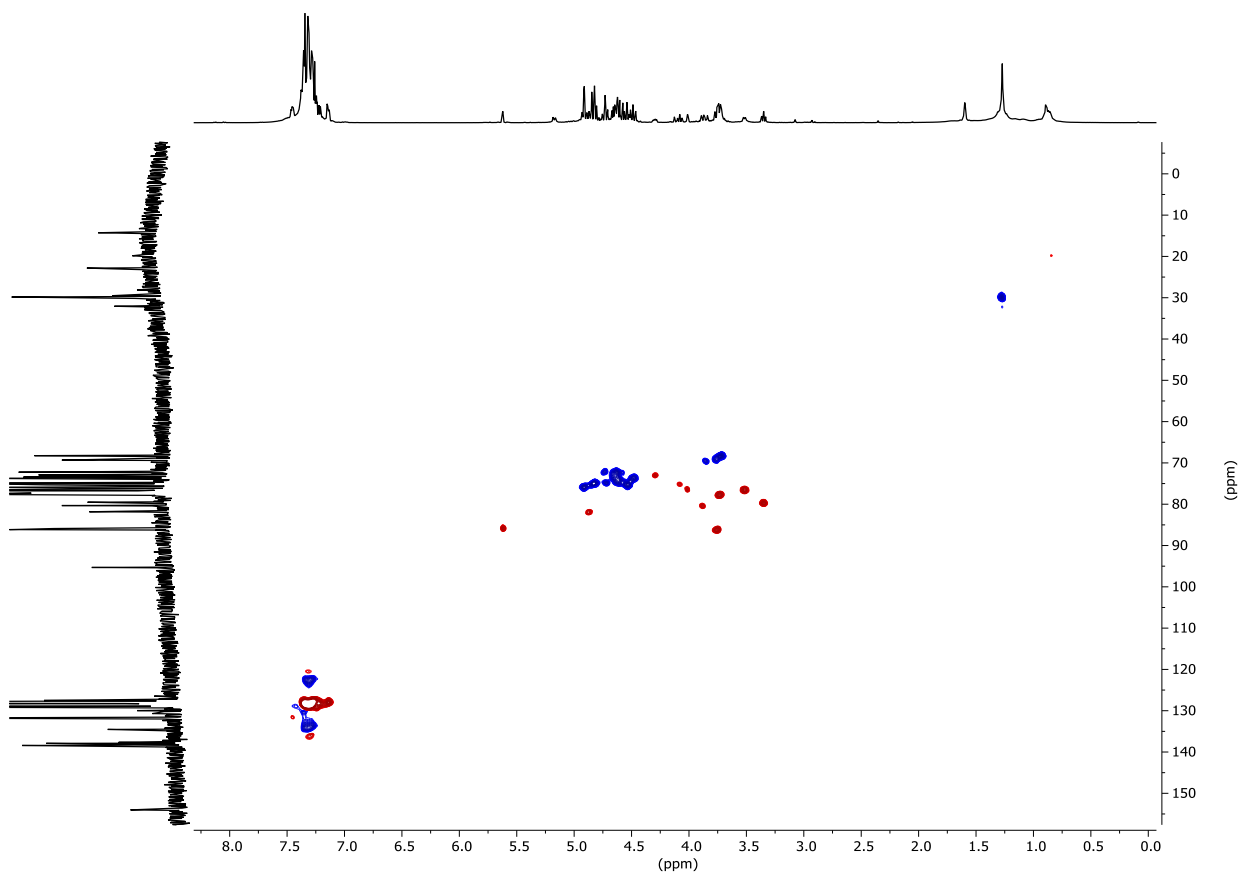

Compound S32

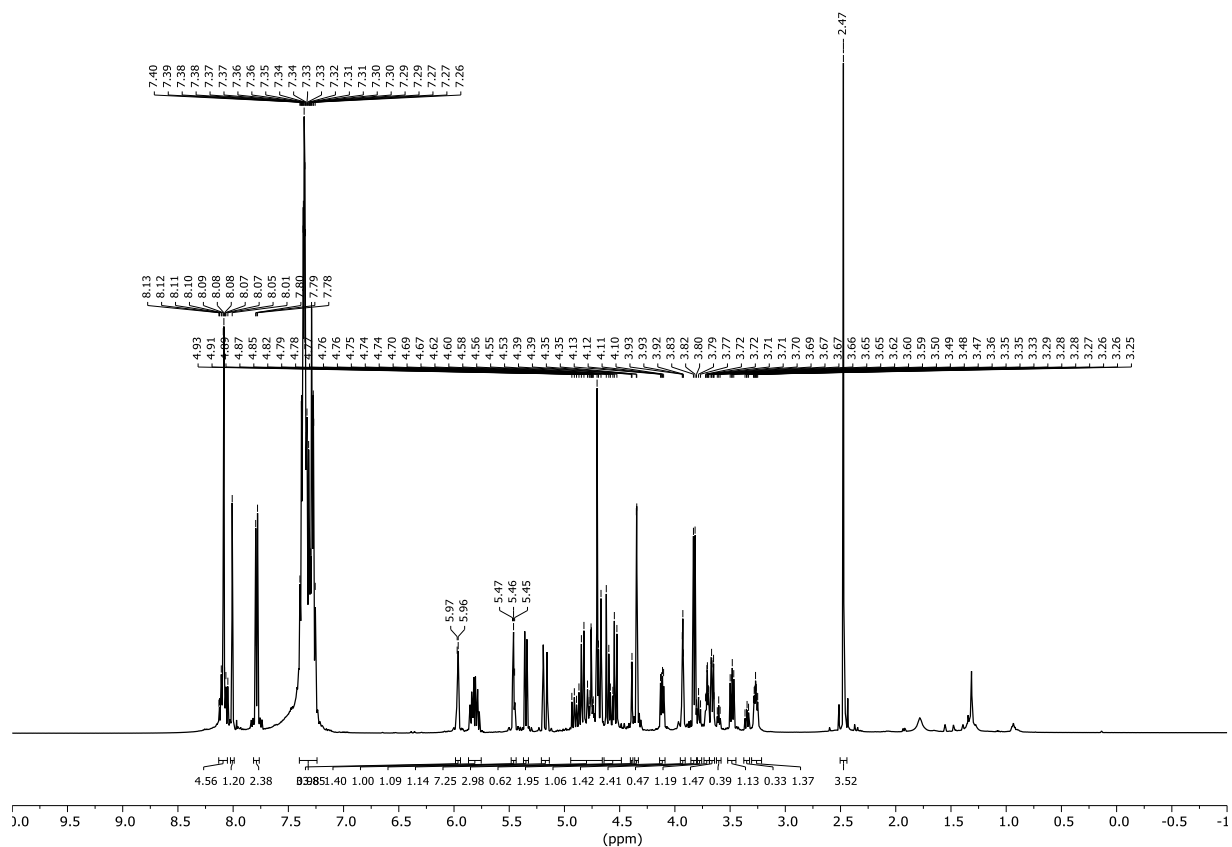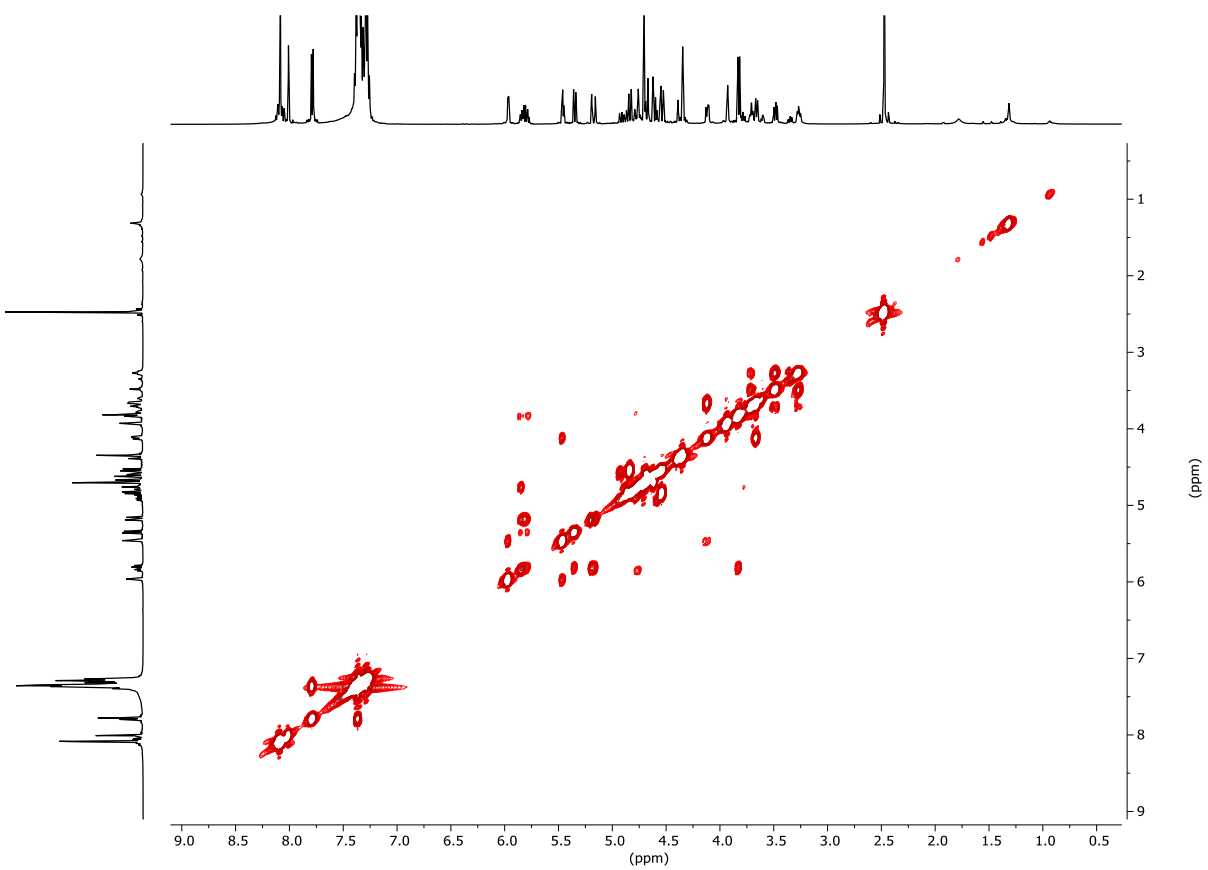

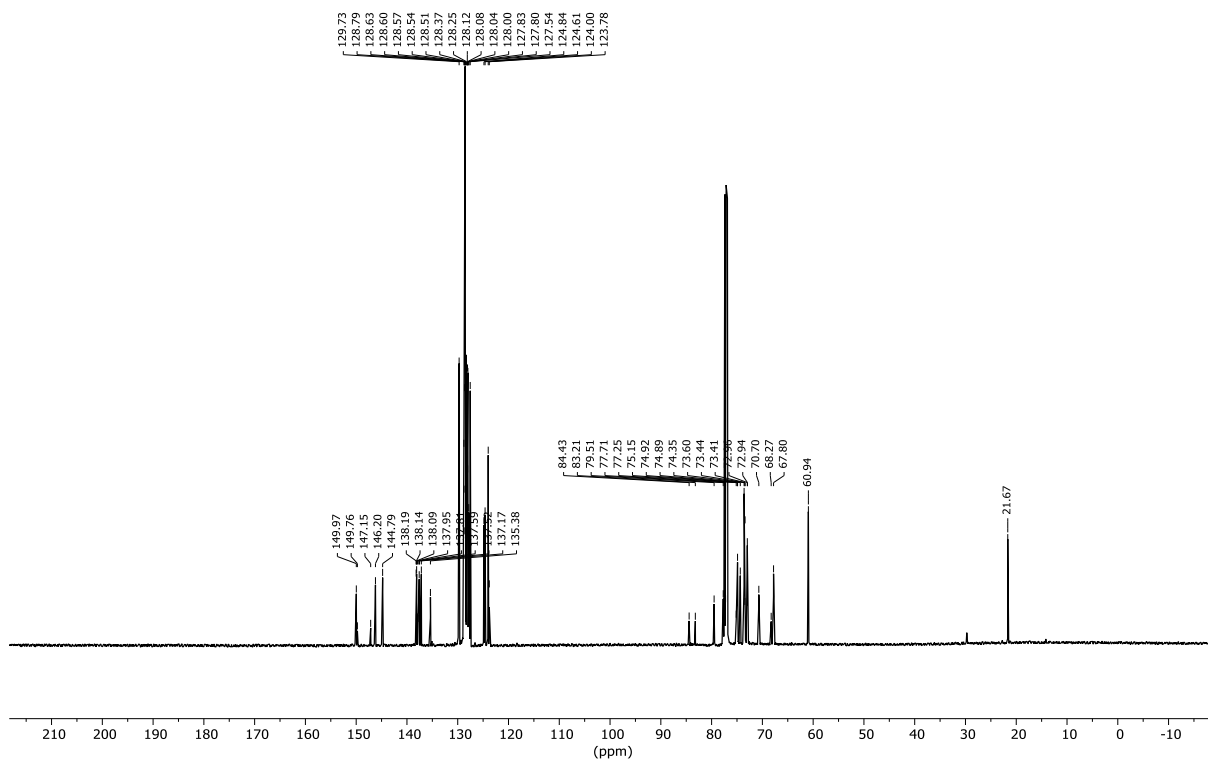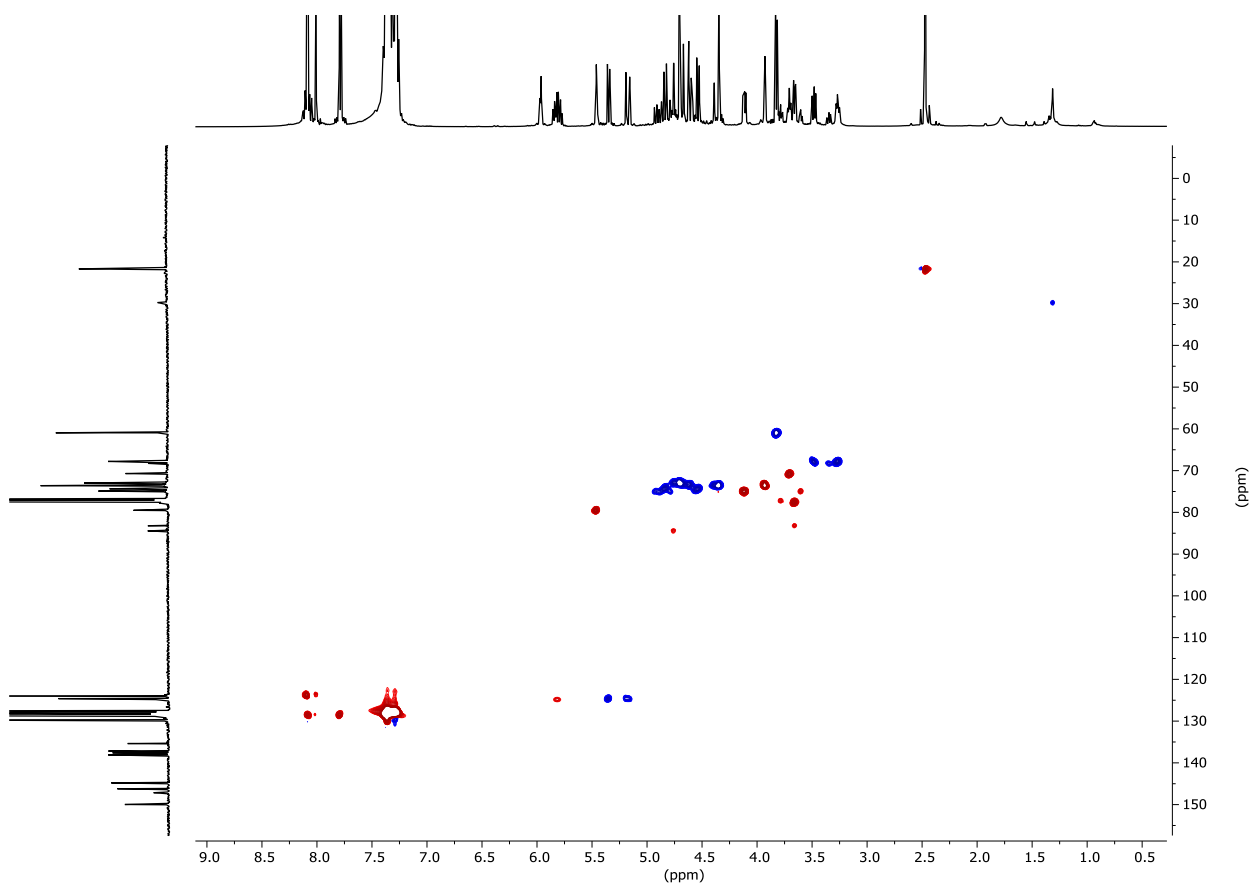

Supplement: SC-010-C9SC00857H-s002.pdf [file SC-010-C9SC00857H-s002.pdf]
